# Supplementary material for: Lipidomic signatures of CNS ischemic injury and their modulation by immunomodulatory hydrogels
Source: Royal Society of Chemistry journal article supplement (doi:10.1039/d6an00089d), 2026-05-12
Supplement: d6an00089d2.xlsx [file d6an00089d2.xlsx]

## Sheet: METASPACE File Table
	HA MAP (Neurotransmitter Range)			Control (Neurotransmitter Range)
	Table Name	File Name (METASPACE)		Table Name	File Name (METASPACE)
	I	20250612_HAMAP1_0954AM_MFW		C59M1R1	1_20240520_C59M1T1_1132AM_MFW_1
	II	20250612_HAMAP2_1217PM_MFW		C59M1R2	2_20240520_C59M1T2_1157AM_MFW_2
	III	20250612_HAMAP3_1150AM_MFW		C57M3R1	3_20240520_C57M3T1_1221PM_MFW_3
				C57M3R2	4_20240520_C57M3T2_1249PM_MFW_4
	HA MAP (Lipid Range)			C57M4R1	5_20240520_C57M4T1_0114PM_MFW_5
	Table Name	File Name (METASPACE)		C57M4R2	6_20240520_C57M4T2_0139PM_MFW_6
	I	20250613_HAMAP1Lip_0324PM_MFW		C59M1R3	7_20240520_C59M1T1710_0202PM_MFW_7
	II	20250613_HAMAP2Lip_0120PM_MFW		C59M1R4	8_20240520_C59M1T2710_0227PM_MFW_8
	III	20250613_HAMAP3Lip_0147PM_MFW
				Control (Neurotransmitter Range)
	PSA MAP (Neurotransmitter Range)			Table Name	File Name (METASPACE)
	Table Name	File Name (METASPACE)		C59M1R1	13_20240520_C59M1510T3L_0513PM_MFW_13
	I	20250612_PSA1_0138PM_MFW		C59M1R2	14_20240520_C59M1510T4L_0535PM_MFW_14
	II	20250612_PSA2_1037AM_MFW		C57M3R1	15_20240520_C57M3T3L_0557PM_MFW_15
	III	20250612_PSA3_0112PM_MFW		C57M3R2	16_20240520_C57M3T4L_0623PM_MFW_16
				C57M4R1	9_20240520_C57M4T3L_0329PM_MFW_9
	PSA MAP (Lipid Range)			C57M4R2	10_20240520_C57M4T4L_0400PM_MFW_10
	Table Name	File Name (METASPACE)		C59M1R3	11_20240520_C59M1710T3L_0422PM_MFW_11
	I	20250613_PSA1Lip_1133AM_MFW		C59M1R4	12_20240520_C59M1710T4L_0448PM_MFW_12
	II	20250613_PSA2Lip_0238PM_MFW
	III	20250613_PSA13Lip_1202PM_MFW		METASPACE:	https://metaspace2020.org/api_auth/review?prj=6cbb99d4-1784-11ef-86c1-6301d2601fb2&token=vaRpU5OUGpHD

## Sheet: HA MAP
Neurotransmitter Mass Range
						Replicate Detection			Lesion (TIC-Normalized Average Ion Abundance)			Healthy (TIC-Normalized Average Ion Abundance)
formula	adduct	ion	mz	moleculeNames	moleculeIds	I	II	III	I	II	III	I	II	III	log2(Fold Change) (Lesion/Healthy)	"-log10(BH-Adjusted P-Value)"	Selected Annotation	Category	Gel Component
C18H35NO	M+H	C18H35NO+H+	282.279	Oleamide	HMDB0002117	1	1	1	2.27215e-05	2.23523e-05	3.92581e-05	8.47186e-05	0.000126074	5.59079e-05	-1.66107	0.548423	Oleamide	FA	Edge
C6H11NO4	M+H	C6H11NO4+H+	162.076	Aminoadipic acid	LMFA01170098	1	1	1	0.000470301	0.0003863	0.000513254	0.00121602	0.000886944	0.000522008	-0.93828	0.50517	Aminoadipic acid	FA	Edge
C12H11NO	M+NH4	C12H11NO+NH4+	203.118	4-Hydroxydiphenylamine	HMDB0032597	1	1	1	1.11626e-06	1.01553e-06	4.46261e-06	9.7038e-06	9.8272e-06	3.22689e-06	-1.78705	0.533385	N-hydroxy-4-aminobiphenyl	PM	Edge
C7H7NO2	M+H	C7H7NO2+H+	138.055	Trigonelline, p-Aminobenzoic acid, 3-Pyridylacetic acid, Methyl nicotinate, 2-Pyridylacetic acid	HMDB0000875, HMDB0001392, HMDB0001538, HMDB0029806, HMDB0060722	1	1	1	0.000261425	0.000181506	0.000374624	0.00105481	0.000959742	0.000490884	-1.61568	0.574153	2-Aminobenzoic acid	PM	Edge
C8H9NO2	M+H	C8H9NO2+H+	152.071	Acetaminophen, 2-Phenylglycine, Dopamine quinone, Leukoaminochrome, Methyl 2-aminobenzoate, 2-(Methylamino)benzoic acid, 2-Amino-3-methylbenzoate	HMDB0001859, HMDB0002210, HMDB0012219, HMDB0012992, HMDB0029703, HMDB0032609, HMDB0060680	1	1	1	0.000844121	0.00077673	0.00127012	0.00289081	0.00435853	0.00152778	-1.60219	0.520875	Dopamine quinone	PM	Edge
C10H12N2O	M+H	C10H12N2O+H+	177.102	Serotonin, Cotinine	HMDB0000259, HMDB0001046	1	1	1	1.73458e-05	1.69155e-05	3.73637e-05	8.81279e-05	8.63027e-05	3.94176e-05	-1.57805	0.564209	Serotonin	PM	Edge
C6H14N2O	M+H	C6H14N2O+H+	131.118	N-Acetylputrescine	HMDB0002064	1	1	1	1.08672e-06	1.94201e-06	5.53471e-06	1.52415e-05	6.63517e-06	3.28224e-06	-1.55481	0.435337	N-Acetylputrescine	PM	Yes
C5H9N3	M+H	C5H9N3+H+	112.087	Histamine	HMDB0000870	1	1	1	1.0228e-05	7.39526e-06	1.33868e-05	4.52182e-05	2.68737e-05	1.37247e-05	-1.46852	0.501987	Histamine	PM	Edge
C11H14N2O	M+H	C11H14N2O+H+	191.118	5-Methoxytryptamine, N-Methylserotonin, Alline	HMDB0004095, HMDB0004369, HMDB0030533	1	1	1	9.83358e-06	8.87899e-06	2.78898e-05	5.43245e-05	4.90388e-05	2.42789e-05	-1.45363	0.564209	5-Methoxytryptamine	PM	Edge
C10H9NO2	M+H	C10H9NO2+H+	176.071	Indoleacetic acid, 5-Hydroxyindoleacetaldehyde	HMDB0000197, HMDB0004073	1	1	1	1.40576e-05	1.34962e-05	2.84751e-05	5.05626e-05	6.73093e-05	3.42862e-05	-1.44133	0.576611	Indoleacetic acid	PM	Edge
C10H9NO	M+H	C10H9NO+H+	160.076	Indoleacetaldehyde	HMDB0001190	1	1	1	7.41367e-06	8.93923e-06	9.94782e-06	2.89296e-05	3.32254e-05	8.49924e-06	-1.42567	0.489687	Indoleacetaldehyde	PM	Edge
C4H11NO	M+H	C4H11NO+H+	90.0913	Dimethylethanolamine	HMDB0032231	1	1	1	0.00219704	0.00281705	0.00491818	0.0110643	0.011225	0.00397781	-1.40307	0.520875	Dimethylethanolamine	PM	Yes
C8H7NO2	M+H	C8H7NO2+H+	150.055	5,6-Dihydroxyindole, NAPQI	HMDB0004058, HMDB0060946	1	1	1	4.78055e-05	3.70363e-05	5.24594e-05	0.000149736	0.000138	7.44763e-05	-1.39949	0.564209	5,6-Dihydroxyindole	PM	Edge
C8H11NO3	M+H	C8H11NO3+H+	170.081	Norepinephrine, Pyridoxine, 6-Hydroxydopamine, 5-Hydroxydopamine	HMDB0000216, HMDB0000239, HMDB0001537, HMDB0004817	1	1	1	0.000317829	0.000240897	0.000373899	0.000871302	0.00101169	0.000479746	-1.34109	0.548423	Norepinephrine	PM	Edge
C8H11NO2	M+H	C8H11NO2+H+	154.086	Dopamine, p-Octopamine, Vanillylamine	HMDB0000073, HMDB0004825, HMDB0012309	1	1	1	0.000115985	4.22034e-05	0.00013328	0.000317192	0.000217839	0.000197805	-1.33015	0.576611	Dopamine	PM	Edge
C8H13NO4	M+H	C8H13NO4+H+	188.092	2-Keto-6-acetamidocaproate	HMDB0012150	1	1	1	0.000102698	8.60201e-05	0.000131162	0.000306301	0.000328381	0.000150535	-1.29556	0.533385	2-Keto-6-acetamidocaproate	PM	Edge
C10H13NO4	M+H	C10H13NO4+H+	212.092	3-Methoxytyrosine, Methyldopa, 3-O-Methyl-a-methyldopa	HMDB0001434, HMDB0011754, HMDB0060747	1	1	1	1.328e-05	1.03185e-05	3.4815e-05	5.12826e-05	4.63542e-05	4.4136e-05	-1.27921	0.576611	3-Methoxytyrosine	PM	Edge
C8H9NO4	M+H	C8H9NO4+H+	184.06	4-Pyridoxic acid	HMDB0000017	1	1	1	1.05341e-05	5.07393e-06	1.98661e-05	2.88964e-05	1.4436e-05	3.79503e-05	-1.19619	0.520875	4-Pyridoxic acid	PM	Edge
C7H8O	M+NH4	C7H8O+NH4+	126.091	p-Cresol, m-Cresol	HMDB0001858, HMDB0002048	1	1	1	0.000618625	0.000644738	0.000811006	0.00208637	0.00172021	0.000944285	-1.19552	0.533385	p-Cresol	PM	Edge
C7H6O2	M+NH4	C7H6O2+NH4+	140.071	4-Hydroxybenzaldehyde	HMDB0011718	1	1	1	0.000545981	0.000455195	0.00137779	0.00183469	0.00201655	0.00158378	-1.19195	0.576611	4-Hydroxybenzaldehyde	PM	Edge
C6H11N3	M+H	C6H11N3+H+	126.103	1-Methylhistamine, 3-Methylhistamine	HMDB0000898, HMDB0001861	1	1	1	1.65726e-05	1.89823e-05	2.96152e-05	4.21637e-05	6.81393e-05	3.38635e-05	-1.14546	0.533385	1-Methylhistamine	PM	Edge
C10H11NO3	M+H	C10H11NO3+H+	194.081	p-Methylhippuric acid, Phenylacetylglycine, Methyl hippurate, 2-Methylhippuric acid, m-Methylhippuric acid, Methyl n-acetylanthranilate, 4-Hydroxy-5-phenyltetrahydro-1,3-oxazin-2-one, 3-Carbamoyl-2-phenylpropionaldehyde, 4-Anilino-4-oxobutanoic acid	HMDB0013292, HMDB0000821, HMDB0000859, HMDB0011723, HMDB0013245, HMDB0032388, HMDB0060389, HMDB0060366, HMDB0060758	1	1	1	2.24935e-05	2.96702e-05	5.93014e-05	7.76783e-05	8.20442e-05	8.51653e-05	-1.13553	0.576611	Phenylacetylglycine	PM	Edge
C9H11NO4	M+H	C9H11NO4+H+	198.076	L-Dopa, DL-Dopa	HMDB0000181, HMDB0000609	1	1	1	1.81834e-05	1.27343e-05	3.77508e-05	5.78011e-05	4.07931e-05	5.09429e-05	-1.12278	0.576611	L-Dopa	PM	Edge
C9H13NO2	M+H	C9H13NO2+H+	168.102	3-Methoxytyramine, p-Synephrine, 4-Methoxytyramine, 4-(beta-Methylaminoethyl)catechol, 4-Hydroxynorephedrine, a-Methyldopamine	HMDB0000022, HMDB0004826, HMDB0012162, HMDB0032020, HMDB0060592, HMDB0060807	1	1	1	0.000133322	9.62713e-05	0.000248704	0.000353678	0.000259541	0.00041701	-1.10699	0.576611	3-Methoxytyramine	PM	Edge
C10H11NO	M+H	C10H11NO+H+	162.091	Tryptophanol, (R)-Boschniakine	HMDB0003447, HMDB0030267	1	1	1	4.18095e-05	4.18599e-05	6.60218e-05	0.000118877	0.000129381	7.35983e-05	-1.10443	0.576611	Tryptophanol	PM	Edge
C5H7N3O	M+H	C5H7N3O+H+	126.066	5-Methylcytosine, 2-O-Methylcytosine, 3-Methylcytosine	HMDB0002894, HMDB0004339, HMDB0011601	1	1	1	1.23553e-05	1.48155e-05	2.79946e-05	5.07451e-05	3.84871e-05	2.73272e-05	-1.07923	0.564209	5-Methylcytosine	PM	Edge
C8H7NO	M+H	C8H7NO+H+	134.06	Indoxyl, 4-Hydroxybenzeneacetonitrile, 2-Methyl-4,5-benzoxazole	HMDB0004094, HMDB0029757, HMDB0032390	1	1	1	6.85562e-05	5.16016e-05	0.000116173	0.00017982	0.000171997	0.000142742	-1.06534	0.576611	5-Hydroxyindole	PM	Edge
C7H13NO4	M+H	C7H13NO4+H+	176.092	N-Carboxyethyl-g-aminobutyric acid	HMDB0002201	1	1	1	3.94193e-05	3.64202e-05	6.40828e-05	0.0001224	0.000109677	5.99468e-05	-1.06146	0.533385	N-Carboxyethyl-g-aminobutyric acid	PM	Yes
C5H7NO2	M+H	C5H7NO2+H+	114.055	1-Pyrroline-5-carboxylic acid, 1-Pyrroline-2-carboxylic acid	HMDB0001301, HMDB0006875	1	1	1	0.000517456	0.00030935	0.000842004	0.00139961	0.00103932	0.00103846	-1.05919	0.576611	1-Pyrroline-5-carboxylic acid	PM	Edge
C3H4N2O	M+H	C3H4N2O+H+	85.0396	Imidazolone	HMDB0004363	1	1	1	0.00157317	0.00154771	0.000716666	0.00395582	0.00307581	0.000861197	-1.04036	0.410195	Imidazolone	PM	Edge
C6H11NO3	M+H	C6H11NO3+H+	146.081	Isobutyrylglycine, N-Butyrylglycine, Allysine, 4-Acetamidobutanoic acid, (S)-5-Amino-3-oxohexanoate, 2-Keto-6-aminocaproate, L-trans-5-Hydroxy-2-piperidinecarboxylic acid, N-(2-Carboxymethyl)-morpholine	HMDB0000730, HMDB0000808, HMDB0001263, HMDB0003681, HMDB0012131, HMDB0012151, HMDB0029426, HMDB0061156	1	1	1	0.00013176	0.000132754	0.000181285	0.000380792	0.000349661	0.000186363	-1.04024	0.533385	4-Acetamidobutanoic acid	PM	Edge
C8H9NO3	M+H	C8H9NO3+H+	168.066	Pyridoxal, Isopyridoxal	HMDB0001545, HMDB0004290	1	1	1	0.000228206	0.000191955	0.000379016	0.000554074	0.000601476	0.000449267	-1.00582	0.576611	Pyridoxal	PM	Edge
C9H13NO3	M+H	C9H13NO3+H+	184.097	Epinephrine, Normetanephrine, Methylnoradrenaline, Ginkgotoxin	HMDB0000068, HMDB0000819, HMDB0002832, HMDB0029455	1	1	1	3.61682e-05	3.39654e-05	6.924e-05	0.000104529	9.76087e-05	7.71137e-05	-1.00261	0.576611	Epinephrine	PM	Edge
C5H10N2O	M+H	C5H10N2O+H+	115.087	3-Amino-2-piperidone, N-Mononitrosopiperazine	HMDB0000323, HMDB0061162	1	1	1	0.00010242	0.000180973	0.000375661	0.000340503	0.000702573	0.000271669	-0.996315	0.44461	3-Amino-2-piperidone	PM	Edge
C11H12O3	M+NH4	C11H12O3+NH4+	210.112	Dehydrozingerone, (R)-Shinanolone, Methyl trans-p-methoxycinnamate, Allyl phenoxyacetate, 1-(4-methoxy-1-benzofuran-5-yl)ethan-1-ol, 2,2-dimethyl-2H-chromene-5,7-diol, 2,2-dimethyl-2H-chromene-5,6-diol, 5,5-dimethyl-3,6-dioxatricyclo[5.4.0.0Â²,â´]undeca-1(11),7,9-trien-11-ol, 2-(hydroxymethyl)-2-methyl-2H-chromen-5-ol, ethyl (2E)-3-(4-hydroxyphenyl)prop-2-enoate, 4-(4-hydroxy-3-methoxyphenyl)but…	HMDB0032591, HMDB0030580, HMDB0030752, HMDB0031610, HMDB0129370, HMDB0126380, HMDB0126381, HMDB0126382, HMDB0126383, HMDB0131282, HMDB0133439, HMDB0133477, HMDB0133482, HMDB0133510, HMDB0133534	1	1	1	9.00614e-06	1.14686e-05	2.22218e-05	3.82419e-05	3.05724e-05	1.60065e-05	-0.990297	0.520875	Dehydrozingerone	PM	Edge
C8H9NO	M+H	C8H9NO+H+	136.076	N-Acetylarylamine, 2-Phenylacetamide, 2-Aminoacetophenone, 2'-Aminoacetophenone	HMDB0001250, HMDB0010715, HMDB0032628, HMDB0032630	1	0	1	0.000232405	0.00042527	0.000550597	0.000640845	0.000975489	0.000763976	-0.978204	0.576611	2-Phenylacetamide	PM	Edge
C4H9NO3	M+H	C4H9NO3+H+	120.066	L-Homoserine, L-Allothreonine, Hydroxyethyl glycine	HMDB0000719, HMDB0004041, HMDB0061148	1	1	1	0.000154527	0.000125839	0.000147848	0.000360433	0.00028377	0.000163302	-0.915141	0.520875	L-Homoserine	PM	Edge
C4H7NO	M+H	C4H7NO+H+	86.06	2-Pyrrolidinone	HMDB0002039	1	1	1	0.0046747	0.00380305	0.00427204	0.0093144	0.00890195	0.00577375	-0.911965	0.574153	2-Pyrrolidinone	PM	Edge
C8H11N	M+H	C8H11N+H+	122.096	N,N-Dimethylaniline, 1-Phenylethylamine, Phenylethylamine, 5-Ethyl-2-methylpyridine, 2-Propylpyridine, 2,6-Dimethylaniline	HMDB0001020, HMDB0002017, HMDB0012275, HMDB0029729, HMDB0032497, HMDB0060677	1	1	1	0.00023987	0.0002009	0.000355737	0.00054823	0.00047249	0.000417136	-0.852161	0.576611	1-Phenylethylamine	PM	Edge
C8H10O3	M+NH4	C8H10O3+NH4+	172.097	Sylvopinol, 4-Hydroxy-3-methoxybenzenemethanol, 5-ethylbenzene-1,2,3-triol, 2,4-dimethylbenzene-1,3,5-triol, 5-methoxy-4-methylbenzene-1,3-diol, 5-methoxy-2-methylbenzene-1,3-diol, 2,3-dimethoxyphenol, 1-(4-hydroxyphenyl)ethane-1,2-diol	HMDB0030570, HMDB0032012, HMDB0125534, HMDB0126617, HMDB0131231, HMDB0131232, HMDB0131479, HMDB0135785	1	1	1	6.79665e-05	6.72467e-05	9.40569e-05	0.000166687	0.000141588	9.59991e-05	-0.818287	0.547555	4-Hydroxy-3-methoxybenzenemethanol (Vanillyl alcohol)	PM	Edge
C7H11NO3	M+H	C7H11NO3+H+	158.081	3-Methylcrotonylglycine, Tiglylglycine	HMDB0000459, HMDB0000959	1	1	1	0.000154719	0.000148171	0.000371426	0.000434178	0.000398417	0.000332447	-0.788885	0.520875	N-Acetylproline	PM	Edge
C11H13NO3	M+H	C11H13NO3+H+	208.097	N-Acetyl-L-phenylalanine, 3-Phenylpropionylglycine, Phenylpropionylglycine, N-isopropylterephthalamic acid	HMDB0000512, HMDB0002042, HMDB0000860, HMDB0060608	1	1	1	8.39237e-06	1.22306e-05	2.89618e-05	2.7391e-05	2.55917e-05	3.20447e-05	-0.77803	0.487218	N-Acetyl-L-phenylalanine	PM	Edge
C8H7NO3	M+H	C8H7NO3+H+	166.05	Formylanthranilic acid, 4-Pyridoxolactone, 5-Pyridoxolactone, Noradrenochrome	HMDB0004089, HMDB0003454, HMDB0004291, HMDB0013030	1	1	1	2.12355e-05	1.63282e-05	4.9212e-05	5.28469e-05	3.3308e-05	6.24486e-05	-0.776104	0.483735	Formylanthranilic acid	PM	Edge
C7H11NO4	M+H	C7H11NO4+H+	174.076	N-Acetyl-L-glutamate 5-semialdehyde	HMDB0006488	1	1	1	5.16834e-05	4.72694e-05	0.00010671	0.000122407	0.000103864	0.000103044	-0.67919	0.520875	N-Acetyl-L-glutamate 5-semialdehyde	PM	Edge
C4H9NO	M+H	C4H9NO+H+	88.0757	Morpholine, 4-Aminobutyraldehyde, N-Ethylacetamide, 2-(dimethylamino)acetaldehyde	HMDB0031581, HMDB0001080, HMDB0031215, HMDB0142479	1	1	1	0.00546091	0.00520875	0.00600757	0.00922111	0.00899909	0.00727145	-0.612144	0.576611	4-Aminobutyraldehyde	PM	Yes
C10H16N2O3	M+H	C10H16N2O3+H+	213.123	L-prolyl-L-proline	HMDB0011180	1	1	1	7.09655e-06	7.24171e-06	1.63969e-05	2.97005e-05	2.70858e-05	1.62821e-05	-1.24936	0.576611	L-prolyl-L-proline	PM/AA	Edge
C9H11NO3	M+H	C9H11NO3+H+	182.081	L-Tyrosine, 4-Hydroxy-4-(3-pyridyl)-butanoic acid, L-Threo-3-Phenylserine, Beta-Tyrosine, o-Tyrosine	HMDB0000158, HMDB0001119, HMDB0002184, HMDB0003831, HMDB0006050	1	1	1	7.56509e-05	6.44478e-05	0.000132375	0.000159495	0.000183005	0.000151047	-0.857073	0.576611	L-Tyrosine	PM/AA	Edge
C8H11NO	M+H	C8H11NO+H+	138.091	2-Hydroxyphenethylamine, Tyramine, Dimethylaniline-N-oxide, m-Tyramine, 2-Acetyl-1-ethylpyrrole, 4-Hydroxy-2,6-dimethylaniline	HMDB0001065, HMDB0000306, HMDB0001466, HMDB0004989, HMDB0029759, HMDB0060681	1	1	1	0.000444739	0.000327755	0.000539715	0.000833212	0.000723453	0.00058809	-0.708817	0.576611	Tyramine	PM/AA	Edge
C10H11NO2	M+H	C10H11NO2+H+	178.086	5-Hydroxytryptophol, 1,2-Dehydrosalsolinol	HMDB0001855, HMDB0012490	1	1	1	4.3619e-05	5.62526e-05	8.94943e-05	9.14678e-05	0.000116679	7.78252e-05	-0.594695	0.520875	5-Hydroxytryptophol	PM	Edge
C6H9NO2	M+H	C6H9NO2+H+	128.071	(Â±)-4-Methylene-2-pyrrolidinecarboxylic acid, D-1-Piperideine-2-carboxylic acid, (S)-2,3,4,5-Tetrahydropiperidine-2-carboxylate	HMDB0029434, HMDB0001084, HMDB0012130	1	1	1	0.000858442	0.000754082	0.00353358	0.00209196	0.00231729	0.0031813	-0.560726	0.231524	D-1-Piperideine-2-carboxylic acid	PM	Edge
C9H9NO2	M+H	C9H9NO2+H+	164.071	4-(3-Pyridyl)-3-butenoic acid, 3-Methyldioxyindole	HMDB0001424, HMDB0004186	1	1	1	0.000154117	0.000137327	0.000283619	0.000254658	0.000244723	0.000299118	-0.473571	0.447557	3-Methyldioxyindole	PM	Edge
C7H8O4	M+H	C7H8O4+H+	157.05	Ascladiol, 2,3-Methyleneglutaric acid, 4-methoxybenzene-1,2,3-triol, 2-methoxybenzene-1,3,5-triol, 6-methoxybenzene-1,2,4-triol, 5-methoxybenzene-1,2,3-triol	HMDB0029610, HMDB0059731, HMDB0125064, HMDB0125077, HMDB0140890, HMDB0140891	0	1	1	0.00028892	0.000238536	0.000386971	0.000432995	0.00034721	0.000420172	-0.392547	0.520875	2,3-Methyleneglutaric acid	PM	Yes
C10H8O4	M+H	C10H8O4+H+	193.05	8-Hydroxy-7-methoxy-2H-1-benzopyran-2-one, 7-hydroxy-3-(hydroxymethyl)-1H-isochromen-1-one, 6-hydroxy-3-(hydroxymethyl)-1H-isochromen-1-one, 5-hydroxy-3-(hydroxymethyl)-1H-isochromen-1-one, 4-methoxy-1-benzofuran-5-carboxylic acid, 6-hydroxy-7-methoxy-2H-chromen-2-one, 5,7-dihydroxy-4-methyl-2H-chromen-2-one, 5-hydroxy-7-methoxy-2H-chromen-2-one, 7-hydroxy-5-methoxy-2H-chromen-2-one, 6,7-dihydrox…	HMDB0030692, HMDB0128620, HMDB0128621, HMDB0128622, HMDB0129374, HMDB0132246, HMDB0136758, HMDB0136674, HMDB0136675, HMDB0136755, HMDB0136756, HMDB0136757, HMDB0136775, HMDB0136776	1	1	1	3.5477e-06	5.38627e-06	1.12367e-05	1.3174e-05	3.21323e-06	1.00342e-05	-0.389451	0.164054	Scopoletin	PM	Edge
C6H6O4	M+H	C6H6O4+H+	143.034	trans-trans-Muconic acid, Sumiki's acid, cis,cis-Muconic acid, 2,3-Methylenesuccinic acid, benzene-1,2,3,5-tetrol, benzene-1,2,3,4-tetrol	HMDB0002349, HMDB0002432, HMDB0006331, HMDB0059762, HMDB0125218, HMDB0134002	1	1	1	0.000205993	0.00012367	0.000228983	0.000257556	0.000103417	0.000174332	0.0615726	0.0397733	2,3-Methylenesuccinic acid	PM	Edge
C4H6O3	M+H	C4H6O3+H+	103.039	3-methyl pyruvic acid, 4-hydroxy-crotonic acid, 2-methyl-3-oxo-propanoic acid, 3-hydroxybut-2-enoic acid, (S)-Methylmalonic acid semialdehyde, Acetoacetic acid, Succinic acid semialdehyde	LMFA01060002, LMFA01050398, LMFA01060193, LMFA01030978, LMFA01060190, LMFA01060003, LMFA06000118	1	1	1	0.00116533	0.000772113	0.00156219	0.001263	0.000819637	0.000992149	0.186719	0.157413	Succinic acid semialdehyde	FA	Edge
C4H4O2	M+H	C4H4O2+H+	85.0284	4-Hydroxy-2-butenoic acid gamma-lactone	HMDB0032330	1	1	1	0.00858199	0.00635889	0.00697718	0.00741952	0.00597239	0.00560548	0.206319	0.36749	4-Hydroxy-2-butenoic acid gamma-lactone	PM	Edge
C6H4O2	M+NH4	C6H4O2+NH4+	126.055	Quinone, 1,2-Benzoquinone	HMDB0003364, HMDB0012133	1	1	1	0.00101525	0.000919379	0.00316639	0.00155747	0.00144276	0.0013521	0.228999	0.0982255	Quinone	PM	Edge
C8H8O4	M+H	C8H8O4+H+	169.05	3-Hydroxymandelic acid, 2',4',6'-Trihydroxyacetophenone, 3,4-Dihydroxymandelaldehyde, 2,6-Dimethoxy-1,4-benzoquinone, Homogentisic acid, p-Hydroxymandelic acid, 3,4-Dihydroxybenzeneacetic acid, 3-hydroxy-5-methoxybenzoic acid, 2-hydroxy-4-methoxybenzoic acid, 3-hydroxy-2-methoxybenzoic acid	HMDB0000750, HMDB0029644, HMDB0006242, HMDB0029673, HMDB0000130, HMDB0000822, HMDB0001336, HMDB0125536, HMDB0131176, HMDB0140902	1	1	1	7.54606e-05	6.80342e-05	0.000172923	0.000114567	7.24572e-05	8.27823e-05	0.229907	0.123841	3,4-Dihydroxybenzeneacetic acid (DOPAC)/2-Hydroxymandelic acid	PM	Edge
C10H13NO3	M+H	C10H13NO3+H+	196.097	N-Acetyldopamine, 2-Phenyl-1,3-propanediol monocarbamate	HMDB0041943, HMDB0060351	1	1	1	2.84525e-05	3.82033e-05	0.000159411	4.45179e-05	4.73724e-05	3.34909e-05	0.850426	0.215946	N-Acetyldopamine	PM	Edge
C5H4O3	M+H	C5H4O3+H+	113.023	3-Furoic acid, 2-Furoic acid	HMDB0000444, HMDB0000617	1	1	1	0.00031272	0.000339536	0.000788812	0.000308527	0.000106179	0.000215166	1.19401	0.474703	3-Furoic acid	PM	Edge
C7H9N3O4	M+H	C7H9N3O4+H+	200.067	(S)-Isowillardiine	HMDB0030376	1	1	1	4.35986e-05	8.53392e-05	0.00028268	0	0	0	Only in Lesion	0.479385	(S)-Isowillardiine/Willardiine	PM	Edge
C5H9NO2	M+H	C5H9NO2+H+	116.071	L-Proline, D-Proline, Acetamidopropanal, 4-Amino-2-methylenebutanoic acid	HMDB0000162, HMDB0003411, HMDB0012880, HMDB0030409	0	1	0									L-Proline	PM	Edge
C4H7NO3	M+H	C4H7NO3+H+	118.05	L-2-Amino-3-oxobutanoic acid, Acetylglycine, L-Aspartate-semialdehyde	HMDB0006454, HMDB0000532, HMDB0012249	0	1	0									L-2-Amino-3-oxobutanoic acid	FA	Edge
C6H11NO2	M+H	C6H11NO2+H+	130.086	L-trans-4-Methyl-2-pyrrolidinecarboxylic acid, L-Pipecolic acid, D-Pipecolic acid, Pipecolic acid, N4-Acetylaminobutanal, 2-Pyrrolidineacetic acid	HMDB0029435, HMDB0000716, HMDB0005960, HMDB0000070, HMDB0004226, HMDB0029444	0	1	0									Pipecolic acid	PM	Edge
C8H8O5	M+H	C8H8O5+H+	185.044	3,4-Dihydroxymandelic acid, 4-O-Methylgallic acid, Methyl 2,4,6-trihydroxybenzoate, 2,4-dihydroxy-5-methoxybenzoic acid, 2,4-dihydroxy-3-methoxybenzoic acid, 2,5-dihydroxy-4-methoxybenzoic acid, 2-(2,4-dihydroxyphenyl)-2-hydroxyacetic acid, 2-(3,4,5-trihydroxyphenyl)acetic acid, 2-(2,3,4-trihydroxyphenyl)acetic acid, 2-(2,4,5-trihydroxyphenyl)acetic acid, 2,3-dihydroxy-4-methoxybenzoic acid	HMDB0001866, HMDB0013198, HMDB0029650, HMDB0125522, HMDB0125542, HMDB0130482, HMDB0126480, HMDB0130405, HMDB0130407, HMDB0130408, HMDB0140912	0	1	0									3,4-Dihydroxymandelic acid	PM	Edge
C3H6O2	M+H	C3H6O2+H+	75.0441	Propionic acid	LMFA01010003	1	1	1	7.89052e-05	2.19756e-05	1.86673e-05	3.21934e-05	2.46047e-05	1.52812e-05	0.729937	0.215946	Propionic acid	FA
C3H8O2	M+H	C3H8O2+H+	77.0597	(S)-Propane-1,2-diol	HMDB0006213	1	1	1	0.000145825	0.000329067	0.00016156	5.46218e-05	9.16852e-05	5.88819e-05	1.6331	0.520875	(S)-Propane-1,2-diol	PM
C3H2O2	M+NH4	C3H2O2+NH4+	88.0393	Propynoic acid	HMDB0006804	1	1	1	0.000441079	0.000350833	0.000393739	0.000523943	0.000570725	0.000585955	-0.503317	0.576611	Propynoic acid	PM
C3H4O3	M+H	C3H4O3+H+	89.0233	Pyruvic acid	LMFA01060077	1	1	1	6.26853e-05	3.70647e-05	5.52162e-05	5.23634e-05	2.78886e-05	3.07125e-05	0.481855	0.44461	Pyruvic acid	FA
C4H12N2	M+H	C4H12N2+H+	89.1073	Putrescine	HMDB0001414	1	1	1	0.0001018	0.000128859	0.000227444	0.00045976	0.000401597	0.000233552	-1.25707	0.576611	Putrescine	PM
C6H7N	M+H	C6H7N+H+	94.0651	Aniline	HMDB0003012	1	1	1	0.00279109	0.00247114	0.00407995	0.00491087	0.00548772	0.00499653	-0.720642	0.576611	Aniline	PM
C4H5NS	M+H	C4H5NS+H+	100.022	Allyl isothiocyanate, 3-Thiocyanato-1-propene	HMDB0005843, HMDB0029755	1	1	1	5.00729e-05	4.2346e-05	0.000105226	8.13768e-05	7.12795e-05	0.000107185	-0.39472	0.265739	Allyl isothiocyanate	PM
C5H6N2O	M+H	C5H6N2O+H+	111.055	Imidazole-4-acetaldehyde, 3-Hydroxy-4-aminopyridine	HMDB0003905, HMDB0060741	1	1	1	8.83553e-05	5.68827e-05	0.000129189	0.000252918	0.000147912	0.000205076	-1.14267	0.576611	Imidazole-4-acetaldehyde	PM
C5H5NO2	M+H	C5H5NO2+H+	112.039	Pyrrole-2-carboxylic acid	HMDB0004230	1	1	1	8.83539e-05	4.84726e-05	0.000102138	0.000183959	0.000119292	0.000172504	-0.993422	0.576611	Pyrrole-2-carboxylic acid	PM
C4H5N3O	M+H	C4H5N3O+H+	112.051	Cytosine	HMDB0000630	1	1	1	6.29403e-05	5.61616e-05	1.93011e-05	4.90002e-05	3.85226e-05	2.34723e-05	0.31838	0.169209	Cytosine	PM
C4H6N2O2	M+H	C4H6N2O2+H+	115.05	Dihydrouracil, N-Methylhydantoin	HMDB0000076, HMDB0003646	1	1	1	4.5698e-05	4.26902e-05	4.4999e-05	0.000127926	8.88413e-05	5.98698e-05	-1.05237	0.520875	Dihydrouracil	PM
C6H12O2	M+H	C6H12O2+H+	117.091	(Â±)-2-Methylpentanoic acid, Caproic acid, Isocaproic acid, Methyl (S)-2-Methylbutanoate, Methyl 3-methylbutanoate, Isopropyl propionate, Propyl propionate, Methyl pentanoate, 2-Ethylbutanoic acid, 2-Methylpropyl acetate, Ethyl 2-methylpropanoate, n-Butyl acetate, Diacetone alcohol, 3-Methylpentanoic acid, Ethyl butyrate	HMDB0031580, HMDB0000535, HMDB0000689, HMDB0029762, HMDB0030027, HMDB0030056, HMDB0030059, HMDB0031207, HMDB0031221, HMDB0031246, HMDB0031248, HMDB0031325, HMDB0031511, HMDB0033774, HMDB0033889	1	1	1	0.0673008	0.0294434	0.0502971	0.0527942	0.0685822	0.0422908	-0.154544	0.123841	Caproic acid	FA
C4H7NOS	M+H	C4H7NOS+H+	118.032	Homocysteine thiolactone	HMDB0002287	1	1	1	0.00141491	0.000916279	8.60015e-05	0.00196926	0.00154025	0.000191322	-0.614514	0.191121	Homocysteine thiolactone	PM
C6H6N2O	M+H	C6H6N2O+H+	123.055	Niacinamide, 2-Acetylpyrazine	HMDB0001406, HMDB0031861	1	1	1	0.000461464	0.000375424	0.00140691	0.000611085	0.000564529	0.00166625	-0.340897	0.123841	Niacinamide	PM
C6H5NO2	M+H	C6H5NO2+H+	124.039	Nicotinic acid, Picolinic acid, 2-Hydroxy-4-imino-2,5-cyclohexadienone, Isonicotinic acid	HMDB0001488, HMDB0002243, HMDB0031713, HMDB0060665	1	1	1	7.02721e-05	5.12012e-05	8.7201e-05	0.000176976	0.000114621	0.000148878	-1.07781	0.576611	Picolinic acid	PM
C6H8N2O	M+H	C6H8N2O+H+	125.071	Methylimidazole acetaldehyde, 2-Methoxy-3-methylpyrazine	HMDB0004181, HMDB0031852	1	1	1	0.000127445	9.66142e-05	0.000192216	0.000361361	0.000256795	0.000279968	-1.10937	0.576611	Methylimidazole acetaldehyde	PM
C5H6N2O2	M+H	C5H6N2O2+H+	127.05	Thymine, Imidazoleacetic acid, 1H-Imidazole-1-acetic acid	HMDB0000262, HMDB0002024, HMDB0029736	1	1	1	0.000111913	8.1449e-05	8.82137e-05	8.89258e-05	6.92336e-05	0.00010781	0.0822636	0.105834	Imidazoleacetic acid	PM
C5H6O4	M+H	C5H6O4+H+	131.034	Mesaconic acid, Itaconic acid, Glutaconic acid, Citraconic acid, Gamma-delta-Dioxovaleric acid, Methyl hydrogen fumarate	HMDB0000749, HMDB0002092, HMDB0000620, HMDB0000634, HMDB0013233, HMDB0033809	1	1	1	5.16506e-05	3.10096e-05	5.03158e-05	5.47007e-05	2.48129e-05	3.28784e-05	0.242628	0.18227	Itaconic acid, Glutaconic acid	FA
C9H9N	M+H	C9H9N+H+	132.081	3-Methylindole	HMDB0000466	1	1	1	4.14759e-05	3.606e-05	5.34794e-05	0.000133317	0.000112299	7.73586e-05	-1.30168	0.576611	3-Methylindole	PM
C9H11N	M+H	C9H11N+H+	134.096	1,2,3,4-Tetrahydroisoquinoline	HMDB0012489	1	1	1	0.000461903	0.00087035	0.000679453	0.00120222	0.00151977	0.000654433	-0.747076	0.476666	1,2,3,4-Tetrahydroisoquinoline	PM
C8H7N	M+NH4	C8H7N+NH4+	135.092	Indole	HMDB0000738	1	1	1	0.000153478	0.000155276	0.000181565	0.000489408	0.00064285	0.000205487	-1.44801	0.520875	Indole	PM
C6H14O3	M+H	C6H14O3+H+	135.102	Polypropylene glycol (m w 1,200-3,000)	HMDB0032478	1	1	1	0.0220486	0.00631805	0.0233463	0.0532515	0.0285944	0.0392507	-1.22756	0.576611	Polypropylene glycol (m w 1,200-3,000)	PM
C7H8N2O	M+H	C7H8N2O+H+	137.071	N-Methylnicotinamide, 2-Acetyl-3-methylpyrazine	HMDB0003152, HMDB0030001	1	1	1	8.61048e-05	7.01335e-05	0.000131993	0.000274938	0.000243759	0.000180268	-1.27799	0.576611	2-Methylnicotinamide	PM
C7H7NO	M+NH4	C7H7NO+NH4+	139.087	Benzamide	HMDB0004461	1	1	1	0.000100215	9.68638e-05	0.000241583	0.00049227	0.000397626	0.000246778	-1.37364	0.576611	Benzamide	PM
C6H9N3O	M+H	C6H9N3O+H+	140.082	Histidinal	HMDB0012234	1	1	1	4.63098e-06	1.9624e-06	1.74313e-05	1.40417e-05	7.81884e-06	2.09757e-05	-0.834318	0.324738	Histidinal	PM
C6H8N2O2	M+H	C6H8N2O2+H+	141.066	1,3-Dimethyluracil, Imidazolepropionic acid, Methylimidazoleacetic acid, Pi-Methylimidazoleacetic acid	HMDB0002144, HMDB0002271, HMDB0002820, HMDB0004988	1	1	1	2.88901e-05	2.18874e-05	4.292e-05	8.75517e-05	5.99202e-05	6.98668e-05	-1.21386	0.576611	Methylimidazoleacetic acid	PM
C6H7NO3	M+H	C6H7NO3+H+	142.05	2-Aminomuconic acid semialdehyde	HMDB0001280	1	1	1	3.0816e-05	2.332e-05	8.64649e-05	8.47981e-05	7.89047e-05	8.21084e-05	-0.805944	0.473644	2-Aminomuconic acid semialdehyde	FA
C8H12O	M+NH4	C8H12O+NH4+	142.123	6-Methyl-3,5-heptadien-2-one, 2,3-Dimethyl-2-cyclohexen-1-one, (E,E)-2,4-Octadienal, trans,trans-3,5-Octadien-2-one, 1,5-Octadien-3-one	HMDB0031582, HMDB0031414, HMDB0031686, HMDB0032446, HMDB0032447	1	1	1	0.000240456	0.000185379	0.000251381	0.000437737	0.000350791	0.000306562	-0.693361	0.576611	2,4-octadienal	FA
C6H8O4	M+H	C6H8O4+H+	145.05	3-hexenedioic acid, Ethyl hydrogen fumarate, 3E-methylglutaconic acid, (E)-hex-2-enedioic acid, 2E-methyl-glutaconic acid, 2-methylideneglutaric acid	LMFA01170087, LMFA07010876, LMFA01170068, LMFA01170070, LMFA01170079, LMFA01020394	1	1	1	0.0111426	0.00831721	0.0147103	0.013265	0.0100723	0.0111978	-0.0153317	0.0185988	3-Hexenedioic acid	FA
C9H10N2	M+H	C9H10N2+H+	147.092	Dimethylbenzimidazole, 1H-Indole-3-methanamine, Myosmine, 1,4-Dimethylpyrrolo[1,2-a]pyrazine, 3,4-Dimethylpyrrolo[1,2-a]pyrazine, 1,3-Dimethylpyrrolo[1,2-a]pyrazine	HMDB0003701, HMDB0029740, HMDB0030386, HMDB0030906, HMDB0030907, HMDB0030908	1	1	1	1.93216e-05	2.44874e-05	3.02003e-05	9.03165e-05	0.000107233	2.93667e-05	-1.61638	0.516839	1H-Indole-3-methanamine	PM
C7H14O3	M+H	C7H14O3+H+	147.102	3-Hydroxyisoheptanoic acid, (+/-)-Ethyl 2-hydroxy-2-methylbutyrate, Methyl DL-Leucate, Ethyl 2-hydroxyisovalerate	HMDB0002207, HMDB0032269, HMDB0036231, HMDB0059842	1	1	1	0.000277126	0.000544474	0.000232233	0.000443686	0.000751431	0.000250372	-0.455911	0.215946	3-Hydroxyisoheptanoic acid	FA
C6H13NO3	M+H	C6H13NO3+H+	148.097	(2R,3R,4R)-2-Amino-4-hydroxy-3-methylpentanoic acid, N-(2-Hydroxyethyl)-morpholine N-oxide, 2-amino-6-hydroxyhexanoic acid	HMDB0029449, HMDB0061157, HMDB0142963	1	1	1	9.83277e-06	1.26648e-05	8.35107e-06	3.95388e-05	3.48955e-05	1.10829e-05	-1.47101	0.50517	N-(2-Hydroxyethyl)-morpholine N-oxide	PM
C8H6O3	M+H	C8H6O3+H+	151.039	Phenylglyoxylic acid, (E)-8-Hydroxy-2-octene-4,6-diynoic acid, 4-Hydroxyphthalide	HMDB0001587, HMDB0031515, HMDB0032598	1	1	1	2.84598e-05	2.27492e-05	3.74736e-05	4.89209e-05	2.52028e-05	3.30161e-05	-0.272772	0.215946	Phenylglyoxylic acid	PM
C5H10O5	M+H	C5H10O5+H+	151.06	L-Threo-2-pentulose, D-Xylulose, D-Xylose, D-Ribose, 2-Deoxyribonic acid, D-Ribulose, L-Arabinose, L-Ribulose, Beta-D-ribopyranose, Arabinofuranose, D-Apiose, D-Arabinose, 3-hydroxy-2,2-bis(hydroxymethyl)propanoic acid	HMDB0000751, HMDB0001644, HMDB0000098, HMDB0000283, HMDB0000366, HMDB0000621, HMDB0000646, HMDB0003371, HMDB0012194, HMDB0012325, HMDB0029941, HMDB0029942, HMDB0127617	1	1	1	7.93313e-06	6.67155e-06	1.30622e-05	8.31443e-06	6.65664e-06	8.12204e-06	0.260697	0.21192	D-Ribose	PM
C9H13NO	M+H	C9H13NO+H+	152.107	Phenylpropanolamine, N-Methylphenylethanolamine, N-Methyltyramine, 1,2,3,4,5,6-Hexahydro-5-methyl-7H-cyclopenta[b]pyridin-7-one, 4-Hydroxyamphetamine	HMDB0001942, HMDB0001387, HMDB0003633, HMDB0039658, HMDB0060765	1	1	1	4.96701e-05	6.12378e-05	9.21174e-05	0.000158854	0.000146812	8.77061e-05	-0.954237	0.564209	N-Methyltyramine	PM
C7H8N2O2	M+H	C7H8N2O2+H+	153.066	N1-Methyl-2-pyridone-5-carboxamide, N1-Methyl-4-pyridone-3-carboxamide	HMDB0004193, HMDB0004194	1	1	1	1.9303e-05	1.20262e-05	3.36404e-05	5.63014e-05	3.98049e-05	4.60592e-05	-1.12973	0.576611	N1-Methyl-4-pyridone-3-carboxamide	PM
C7H7NO3	M+H	C7H7NO3+H+	154.05	Mesalazine, 3-Hydroxyanthranilic acid	HMDB0014389, HMDB0001476	1	1	1	6.94746e-06	3.16718e-06	1.5205e-05	1.70725e-05	1.2572e-05	2.01862e-05	-0.976775	0.520875	3-Hydroxyanthranilic acid	PM
C10H12N2	M+H	C10H12N2+H+	161.107	Tryptamine	HMDB0000303	1	1	1	1.2807e-05	1.55272e-05	2.07145e-05	6.91105e-05	8.09181e-05	1.86225e-05	-1.78175	0.50517	Tryptamine	PM
C8H16O3	M+H	C8H16O3+H+	161.117	3-Hydroxyvalproic acid, 4-Hydroxyvalproic acid, Ethyl (Â±)-3-hydroxyhexanoate, 7-Hydroxyoctanoic acid, Hydroxyoctanoic acid, 3-Hydroxyoctanoic acid, (R)-2-Hydroxycaprylic acid, (R)-3-Hydroxyoctanoic acid, 5-Hydroxyvalproic acid, (+/-)-Ethyl 2-hydroxy-3-methylvalerate, Peroxyoctanoic acid, Ethyl 2-hydroxy-4-methylpentanoate	HMDB0013899, HMDB0013900, HMDB0031509, HMDB0000486, HMDB0000711, HMDB0001954, HMDB0002264, HMDB0010722, HMDB0013898, HMDB0032270, HMDB0032827, HMDB0059867	1	1	1	0.000974247	0.00138784	0.00101912	0.0016919	0.00270247	0.0012974	-0.751337	0.483735	3-hydroxyoctanoic acid	FA
C7H15NO3	M+H	C7H15NO3+H+	162.112	L-Carnitine	HMDB0000062	1	1	1	6.02311e-05	5.08527e-05	5.19142e-05	9.88648e-05	9.96459e-05	7.60726e-05	-0.75239	0.576611	L-Carnitine	FA
C6H10O5	M+H	C6H10O5+H+	163.06	2-Hydroxyadipic acid, 3-Hydroxyadipic acid, 3-Hydroxymethylglutaric acid, 2(R)-Hydroxyadipic acid, Levoglucosan, 2-Hydroxy-2-ethylsuccinic acid, D-1-Deoxy-erythro-hexo-2,3-diulose	HMDB0000321, HMDB0000345, HMDB0000355, HMDB0000368, HMDB0000640, HMDB0059758, HMDB0029934	1	1	1	0.00126793	0.000802589	0.00125988	0.00151493	0.0010048	0.000936512	-0.0535097	0.0501332	2-Hydroxyadipic acid	FA
C8H5NO2	M+NH4	C8H5NO2+NH4+	165.066	Agrocybin, Indole-5,6-quinone	HMDB0030481, HMDB0006779	1	1	1	2.11133e-05	1.36695e-05	4.14534e-05	6.43307e-05	4.18886e-05	6.27307e-05	-1.14805	0.576611	Indole-5,6-quinone	PM
C9H12N2O	M+H	C9H12N2O+H+	165.102	Kynuramine	HMDB0012246	1	1	1	6.01262e-05	5.60514e-05	0.000109356	0.000213624	0.000205648	0.000135935	-1.29969	0.576611	Kynuramine	PM
C9H11NO2	M+H	C9H11NO2+H+	166.086	3-Pyridinebutanoic acid, Norsalsolinol	HMDB0001007, HMDB0006044	1	1	1	0.000135741	0.000203761	0.000238079	0.000259749	0.000300361	0.000303596	-0.58052	0.576611	L-Phenylalanine	PM
C8H12N2O2	M+H	C8H12N2O2+H+	169.097	Pyridoxamine	HMDB0001431	1	1	1	3.95994e-05	3.34503e-05	9.13317e-05	0.000143466	0.000117231	0.000127037	-1.23802	0.576611	Pyridoxamine	PM
C11H10N2	M+H	C11H10N2+H+	171.092	2-Amino-5-phenylpyridine	HMDB0029747	1	1	1	4.69057e-07	7.2846e-07	1.29079e-06	9.4456e-06	9.7001e-06	9.87646e-07	-3.01635	0.501987	10-hydroperoxy-H4-neuroprostane	PM
C9H10O2	M+Na	C9H10O2+Na+	173.057	4-Coumaryl alcohol, 2'-Hydroxy-5'-methylacetophenone, Hydrocinnamic acid, 3-Methylphenylacetic acid, 3,4-Dimethylbenzoic acid, 2-Phenylpropionate, 2-Methoxy-4-vinylphenol, Benzyl acetate, o-Tolyl acetate, p-Tolyl acetate, 2'-Methoxyacetophenone, 4'-Methoxyacetophenone, Methyl phenylacetate, 3-ethenyl-5-methoxyphenol, 3-(2-hydroxyphenyl)propanal, 2-(3-hydroxyprop-1-en-1-yl)phenol, 4-(prop-2-en-1-y…	HMDB0003654, HMDB0032592, HMDB0000764, HMDB0002222, HMDB0002237, HMDB0011743, HMDB0013744, HMDB0031310, HMDB0032073, HMDB0032075, HMDB0032569, HMDB0032570, HMDB0032617, HMDB0125532, HMDB0134026, HMDB0134027, HMDB0135239, HMDB0135276, HMDB0135277, HMDB0135278, HMDB0135279, HMDB0135280, HMDB0135281, HMDB0135644	1	1	1	0.00196002	0.00251012	0.0021491	0.00194783	0.00255248	0.00172089	0.0894724	0.129388	Methyl phenylacetate	PM
C11H12N2	M+H	C11H12N2+H+	173.107	1,2,3,4-Tetrahydro-beta-carboline	HMDB0012488	1	1	1	4.83604e-06	5.47391e-06	9.84367e-06	2.61171e-05	2.97325e-05	5.20652e-06	-1.5991	0.474703	1,2,3,4-Tetrahydro-beta-carboline	PM
C8H15NO3	M+H	C8H15NO3+H+	174.112	Hexanoylglycine, Isovalerylalanine, Isovalerylsarcosine, N-Acetylleucine	HMDB0000701, HMDB0000747, HMDB0002087, HMDB0011756	1	1	1	5.75226e-05	5.65233e-05	6.12247e-05	0.000172946	0.000120315	7.35409e-05	-1.06542	0.520875	N-Acetylleucine	PM
C8H14O3	M+NH4	C8H14O3+NH4+	176.128	6-Ethyl-1-methyl-2,7,8-trioxabicyclo[3.2.1]octane, cis-4-Hydroxycyclohexylacetic acid, trans-4-Hydroxycyclohexylacetic acid, Alpha-Ketooctanoic acid, 3-Oxooctanoic acid, Tetrahydrofurfuryl propionate, Ethyl 3-oxohexanoate, 1-Methyl-2-oxopropyl butyrate, 2-n-Propyl-4-oxopentanoic acid, 3-Oxovalproic acid	HMDB0030303, HMDB0000451, HMDB0000909, HMDB0013211, HMDB0010721, HMDB0031177, HMDB0031307, HMDB0036230, HMDB0060683, HMDB0060685	1	1	1	0.000356968	0.00116456	0.000384481	0.000511535	0.00142595	0.00026592	-0.209179	0.0659087	trans-4-Hydroxycyclohexylacetic acid	PM
C9H7NO2	M+NH4	C9H7NO2+NH4+	179.082	2-Indolecarboxylic acid, 4,6-Dihydroxyquinoline, 3-Formyl-6-hydroxyindole	HMDB0002285, HMDB0004077, HMDB0031172	1	1	1	1.12357e-05	9.13068e-06	2.94738e-05	4.32878e-05	3.49803e-05	3.55839e-05	-1.19178	0.576611	4,6-Dihydroxyquinoline	PM
C9H9NO3	M+H	C9H9NO3+H+	180.066	Hippuric acid, 1-(4-Methoxyphenyl)-2-nitroethylene, 3-Succinoylpyridine, Adrenochrome, Methyl n-formylanthranilate	HMDB0000714, HMDB0032595, HMDB0000992, HMDB0012884, HMDB0032398	1	1	1	1.01369e-05	8.28664e-06	2.74106e-05	3.26155e-05	3.26531e-05	2.98838e-05	-1.05382	0.533385	Adrenochrome	PM
C6H13NO5	M+H	C6H13NO5+H+	180.087	Glucosamine, Fructosamine, beta-D-Glucosamine	HMDB0001514, HMDB0002030, HMDB0030091	1	1	1	0.00152036	0.00120479	0.00133813	0.00368474	0.00293833	0.00147748	-0.995377	0.50517	Glucosamine	PM
C9H12N2O2	M+H	C9H12N2O2+H+	181.097	5-Hydroxykynurenamine, Tyrosinamide, L-2-Amino-3-(4-aminophenyl)propanoic acid, (4-Ethoxyphenyl)urea	HMDB0004076, HMDB0013319, HMDB0030397, HMDB0032565	1	1	1	1.87272e-05	1.82496e-05	4.51548e-05	7.56201e-05	6.50645e-05	5.46845e-05	-1.25019	0.576611	5-Hydroxykynurenamine	PM
C10H12O2	M+NH4	C10H12O2+NH4+	182.118	1-Phenylethyl acetate, Benzenebutanoic acid, 3-Phenylbutyric acid, Methyl 3-phenylpropanoate, Benzyl propionate, Propyl benzoate, Isopropyl benzoate, 3-Hydroxy-4-phenylbutan-2-one, 3-(4-Methoxyphenyl)-2-propen-1-ol, Ethyl phenylacetate, Thymoquinone, 4-Isopropylbenzoic acid, 1-ethenyl-3,5-dimethoxybenzene, 4-(3-hydroxyphenyl)butan-2-one, 2-hydroxy-2-methyl-3-phenylpropanal, 2-benzyl-3-hydroxyprop…	HMDB0032620, HMDB0000543, HMDB0001955, HMDB0030060, HMDB0030063, HMDB0031761, HMDB0032038, HMDB0032336, HMDB0032586, HMDB0032618, HMDB0034732, HMDB0035268, HMDB0127494, HMDB0133507, HMDB0133600, HMDB0133601, HMDB0133603, HMDB0133604, HMDB0133605, HMDB0133606, HMDB0133607, HMDB0133608, HMDB0133609, HMDB0133610, HMDB0133617, HMDB0133725, HMDB0133727, HMDB0133729, HMDB0133753, HMDB0133754, HMDB01357…	1	1	1	7.88695e-05	6.89425e-05	0.000146694	0.000172598	0.000130335	0.000239718	-0.88173	0.533385	Phenyl butyrate	PM
C12H14N2	M+H	C12H14N2+H+	187.123	1,2,3,4-Tetrahydro-2-methyl-b-carboline	HMDB0029836	1	1	1	3.59604e-06	4.40657e-06	1.76344e-05	2.82713e-05	2.44131e-05	2.40254e-05	-1.58118	0.576611	1,2,3,4-Tetrahydro-2-methyl-b-carboline	PM
C11H9NO2	M+H	C11H9NO2+H+	188.071	Indoleacrylic acid	HMDB0000734	1	1	1	1.01508e-05	5.54605e-06	2.38248e-05	3.08228e-05	1.34018e-05	4.72437e-05	-1.21063	0.474703	Indoleacrylic acid	PM
C9H17NO3	M+H	C9H17NO3+H+	188.128	N-Heptanoylglycine	HMDB0013010	1	1	1	9.79992e-05	0.000176033	8.9388e-05	0.000156138	0.000270636	9.2079e-05	-0.513688	0.24816	N-Heptanoylglycine	PM
C12H16N2	M+H	C12H16N2+H+	189.139	Dimethyltryptamine	HMDB0005973	1	1	1	2.4058e-06	6.03133e-06	9.08124e-06	2.58899e-05	2.18287e-05	5.337e-06	-1.59864	0.488908	Dimethyltryptamine	PM
C11H11NO2	M+H	C11H11NO2+H+	190.086	Indole-3-propionic acid, Indole-3-methyl acetate	HMDB0002302, HMDB0029738	1	1	1	9.63509e-06	9.05521e-06	1.4151e-05	2.29154e-05	3.03521e-05	1.25279e-05	-1.00248	0.520875	Indole-3-propionic acid	PM
C9H16O3	M+NH4	C9H16O3+NH4+	190.144	Tetrahydrofurfuryl butyrate, 9-Oxo-nonanoic acid	HMDB0036188, HMDB0094711	1	1	1	0.00696061	0.0100302	0.00889076	0.0114025	0.017926	0.0103163	-0.615207	0.501987	9-Oxo-nonanoic acid	FA
C7H10O5	M+NH4	C7H10O5+NH4+	192.087	Shikimic acid, 2-Isopropyl-3-oxosuccinate, 3,4,5-trihydroxycyclohex-1-ene-1-carboxylic acid	HMDB0003070, HMDB0012149, HMDB0130150	1	1	1	0.000109381	0.00010359	0.000136833	0.000269198	0.000234003	0.000161571	-0.926313	0.576611	Shikimic acid	PM
C11H17NO2	M+H	C11H17NO2+H+	196.133	2-hydroxymexiletine, p-hydroxymexiletine	HMDB0060953, HMDB0060954	1	1	1	2.00899e-05	1.50466e-05	3.98729e-05	5.90833e-05	4.23886e-05	7.3584e-05	-1.22267	0.576611	2-hydroxymexiletine	PM
C6H12O6	M+NH4	C6H12O6+NH4+	198.097	D-Glucose, myo-Inositol, L-Sorbose, D-Galactose, D-Mannose, 3-Deoxyarabinohexonic acid, Beta-D-Glucose, D-Fructose, Allose, Alpha-D-Glucose, D-Tagatose, Beta-D-Galactose, Dihydroxyacetone (dimer), 2,5-bis(hydroxymethyl)oxolane-2,3,4-triol	HMDB0000122, HMDB0000211, HMDB0001266, HMDB0000143, HMDB0000169, HMDB0000346, HMDB0000516, HMDB0000660, HMDB0001151, HMDB0003345, HMDB0003418, HMDB0003449, HMDB0032222, HMDB0125599	1	1	1	0.000129933	0.00012519	7.15106e-05	0.000140559	0.000172207	8.73276e-05	-0.292663	0.229356	D-Glucose	PM
C10H15NO3	M+H	C10H15NO3+H+	198.112	Metanephrine, Desglymidodrine	HMDB0004063, HMDB0060558	1	1	1	5.73775e-05	6.07694e-05	0.000111515	0.000216803	0.000160554	0.000135887	-1.16013	0.576611	Metanephrine	PM
C9H10O5	M+H	C9H10O5+H+	199.06	Vanillylmandelic acid, 3-(3,4-Dihydroxyphenyl)lactic acid, 3-(3,4,5-trihydroxyphenyl)propanoic acid, 2-(2,5-dihydroxy-4-methoxyphenyl)acetic acid, 2-(2,3,4-trihydroxyphenyl)propanoic acid, 2-hydroxy-3,4-dimethoxybenzoic acid, 4-hydroxy-2,3-dimethoxybenzoic acid, 2-(2,4,5-trihydroxyphenyl)propanoic acid, 3-(2,4-dihydroxyphenyl)-3-hydroxypropanoic acid, 3-(2,4,5-trihydroxyphenyl)propanoic acid, 2-(…	HMDB0000291, HMDB0003503, HMDB0125529, HMDB0130476, HMDB0137823, HMDB0142084, HMDB0142087, HMDB0125024, HMDB0126478, HMDB0126489, HMDB0131426, HMDB0133489, HMDB0137136, HMDB0140947	1	1	1	2.90098e-05	2.23345e-05	3.9652e-05	3.41582e-05	1.98782e-05	1.91985e-05	0.313277	0.24816	Vanillylmandelic acid	PM
C4H9O7P	M+H	C4H9O7P+H+	201.016	D-Erythrose 4-phosphate	HMDB0001321	1	1	1	3.97083e-05	2.86187e-05	5.37759e-05	0.000110942	7.89778e-05	4.84867e-05	-0.965324	0.520875	D-Erythrose 4-phosphate	PM
C10H19NO3	M+H	C10H19NO3+H+	202.144	Capryloylglycine, Valproylglycine	HMDB0000832, HMDB0013116	1	1	1	6.69094e-05	7.58732e-05	7.17851e-05	0.000109678	0.000141161	7.5934e-05	-0.606858	0.501987	Valproylglycine	PM
C9H17NO4	M+H	C9H17NO4+H+	204.123	L-Acetylcarnitine	HMDB0000201	1	1	1	7.50589e-05	6.94228e-05	6.72487e-05	0.000157385	0.000138734	8.49925e-05	-0.847985	0.523613	L-Acetylcarnitine	FA
C7H12N2O5	M+H	C7H12N2O5+H+	205.082	L-beta-aspartyl-L-alanine, gamma-Glutamylglycine, Alanyl-Aspartic acid, Aspartyl-Alanine, Glutamylglycine	HMDB0011162, HMDB0011667, HMDB0028683, HMDB0028746, HMDB0028819	1	1	1	2.11389e-05	1.09732e-05	1.24129e-05	6.59592e-05	2.9743e-05	1.70885e-05	-1.34096	0.435337	Glutamylglycine	PM
C11H11NO3	M+H	C11H11NO3+H+	206.081	5-Methoxyindoleacetate, Indolelactic acid, Cinnamoylglycine, Edulitine	HMDB0004096, HMDB0000671, HMDB0011621, HMDB0030179	1	1	1	2.47973e-06	3.04821e-06	4.29852e-06	7.59476e-06	1.12322e-05	3.83918e-06	-1.2058	0.501987	5-Methoxyindoleacetate	PM
C9H16O4	M+NH4	C9H16O4+NH4+	206.139	Nonate, (+/-)-Ethyl 3-acetoxy-2-methylbutyrate, Azelaic acid, cis- and trans-Ethyl 2,4-dimethyl-1,3-dioxolane-2-acetate, (+/-)-Methyl 5-acetoxyhexanoate, 2,4-Dimethylpimelic acid, 3-Methylsuberic acid, Diethyl methylsuccinate, Diethyl glutarate	HMDB0011717, HMDB0032258, HMDB0000784, HMDB0032200, HMDB0032387, HMDB0059760, HMDB0059783, HMDB0059814, HMDB0059879	1	1	1	0.000107945	0.000148918	0.000130314	0.000157901	0.00023313	0.000186791	-0.577632	0.564209	Azelaic acid	FA
C10H20O3	M+NH4	C10H20O3+NH4+	206.175	3-Hydroxycapric acid, (R)-3-Hydroxydecanoic acid, (1R,2R,4R,8R)-p-Menthane-2,8,9-triol, 7-Methyl-3-methylene-1,6,7-octanetriol, cis-p-Menthane-1,7,8-triol, 2,6-Dimethyl-7-octene-2,3,6-triol, (1S,2S,4R,8R)-p-Menthane-1,2,9-triol, 2-Hexyl-1,3-dioxolane-4-methanol, (1R,2R,4S)-p-Menthane-1,2,8-triol, xi-5-Hydroxydecanoic acid, Ethyl (Â±)-3-hydroxyoctanoate	HMDB0002203, HMDB0010725, HMDB0033574, HMDB0033640, HMDB0034783, HMDB0038186, HMDB0039470, HMDB0039669, HMDB0039893, HMDB0040329, HMDB0041600	1	1	1	3.68411e-06	8.73411e-06	7.88656e-06	2.50059e-05	2.47643e-05	2.2134e-06	-1.35624	0.394337	3-Hydroxycapric acid	PM
C11H10O4	M+H	C11H10O4+H+	207.065	Isoeugenitol, Eugenitol, Vinyl caffeate, 1-(6-hydroxy-4-methoxy-1-benzofuran-5-yl)ethan-1-one, 6-(hydroxymethyl)-7-methoxy-2H-chromen-2-one	HMDB0029472, HMDB0029466, HMDB0029775, HMDB0129368, HMDB0136784	1	1	1	2.49789e-05	2.21681e-05	2.1652e-05	2.9515e-05	2.17269e-05	1.83444e-05	-0.0164162	0.0200768	Isoeugenitol	PM
C10H12N2O3	M+H	C10H12N2O3+H+	209.092	L-Kynurenine, Formyl-5-hydroxykynurenamine, 4-Aminobenzoyl-(beta)-alanine	HMDB0000684, HMDB0012948, HMDB0060757	1	1	1	1.54247e-06	2.46954e-06	9.00564e-06	1.69879e-05	9.43535e-06	1.42253e-05	-1.64274	0.576611	L-Kynurenine	PM
C10H10O5	M+H	C10H10O5+H+	211.06	Vanilpyruvic acid, 3-(4-hydroxy-3-methoxyphenyl)oxirane-2-carboxylic acid, (2E)-3-(2,4-dihydroxy-3-methoxyphenyl)prop-2-enoic acid, (2E)-3-(2,4-dihydroxy-5-methoxyphenyl)prop-2-enoic acid, 3-(3,4-dihydroxy-5-methoxyphenyl)prop-2-enoic acid, 3-(2,4-dihydroxy-5-methoxyphenyl)prop-2-enoic acid, 3-(2,4-dihydroxy-3-methoxyphenyl)prop-2-enoic acid, 3-(2,3-dihydroxy-4-methoxyphenyl)prop-2-enoic acid, 3-…	HMDB0011714, HMDB0125516, HMDB0125515, HMDB0125514, HMDB0127490, HMDB0127946, HMDB0127947, HMDB0132221, HMDB0132228, HMDB0140909, HMDB0141258, HMDB0141331, HMDB0142176, HMDB0142177, HMDB0142178, HMDB0142180, HMDB0142181	1	1	1	2.50604e-05	2.34365e-05	3.35167e-05	3.9192e-05	2.69357e-05	1.36798e-05	0.03934	0.0236372	Vanilpyruvic acid	PM
C10H9N5O	M+H	C10H9N5O+H+	216.088	Kinetin	HMDB0012245	1	1	1	1.92505e-05	2.12639e-05	7.1231e-06	1.20086e-05	1.03106e-05	6.13164e-06	0.743625	0.403682	Kinetin	PM
C10H19NO4	M+H	C10H19NO4+H+	218.139	Propionylcarnitine, O-propanoyl-carnitine	HMDB0000824, HMDB0062514	1	1	1	4.81087e-05	9.43608e-05	0.000164362	6.38816e-05	9.68605e-05	0.000108267	0.189794	0.102793	Propionylcarnitine	FA
C11H20O3	M+NH4	C11H20O3+NH4+	218.175	4-heptanoyl butyric acid, 8-propionyl caprylic acid, 5R-hydroxy-4R-decanolide, 5S-hydroxy-4R-decanolide, 6-hydroxy-4-Undecanolide, Pelargonyl acetic acid, 3-capryl propionic acid, 9-acetyl pelargonic acid, 3-Hydroxy-2,8-dimethyl-1,7-dioxaspiro[5.5]undecane, 2-hydroxy-10-undecenoic acid, 2S-hydroxy-10-undecenoic acid, (S)-9-Hydroxy-10-undecenoic acid, 2-oxo-undecanoic acid, 3Z-Hexenyl 2R-hydroxy-3…	LMFA01060036, LMFA01060037, LMFA07040022, LMFA07040023, LMFA07040031, LMFA01060034, LMFA01060035, LMFA01060038, LMPK09000029, LMFA01050164, LMFA01050329, LMFA01050436, LMFA01060087, LMFA07010641, LMFA01050328	1	1	1	9.92171e-06	1.28509e-05	1.51968e-05	2.97593e-05	3.06285e-05	2.01756e-05	-1.08529	0.576611	4-heptanoyl butyric acid	FA
C9H18N2O4	M+H	C9H18N2O4+H+	219.134	Isoleucyl-Serine, Leucyl-Serine, Serylisoleucine, Serylleucine, Threoninyl-Valine, Valyl-Threonine	HMDB0028916, HMDB0028938, HMDB0029042, HMDB0029043, HMDB0029074, HMDB0029137	1	1	1	0.000118317	0.000194664	0.000315771	0.000108661	0.000113839	0.000176947	0.654486	0.376831	Leucyl-Serine	PM/AA
C11H22O3	M+NH4	C11H22O3+NH4+	220.191	2-hydroxy hendecanoic acid, 3-Hydroxynonyl acetate, 10-hydroxy-undecanoic acid, 3-hydroxy-undecanoic acid, 4-hydroxy-undecanoic acid, 3S-hydroxy-undecanoic acid, omega-hydroxy hendecanoic acid	LMFA01050034, LMFA07010753, LMFA01050161, LMFA01050162, LMFA01050163, LMFA01050327, LMFA01050035	1	1	1	1.71437e-05	2.19911e-05	1.73162e-05	5.81161e-05	6.15562e-05	1.43953e-05	-1.24789	0.46108	3S-hydroxy-undecanoic acid	FA
C12H13NO2	M+NH4	C12H13NO2+NH4+	221.128	3-Indolebutyric acid, 5-(2-Furanyl)-1,2,3,4,5,6-hexahydro-7H-cyclopenta[b]pyridin-7-one	HMDB0002096, HMDB0039656	1	1	1	2.31419e-06	7.12498e-06	1.30072e-05	1.67418e-05	2.24327e-05	1.46789e-05	-1.26256	0.576611	3-Indolebutyric acid	PM
C11H14N2O3	M+H	C11H14N2O3+H+	223.108	Glycyl-Phenylalanine, Phenylalanyl-Glycine	HMDB0028848, HMDB0028995	1	1	1	9.76121e-06	5.98864e-06	1.83141e-05	3.83572e-05	2.6143e-05	2.82013e-05	-1.44435	0.576611	Phenylalanyl-Glycine	PM/AA
C11H12O5	M+H	C11H12O5+H+	225.076	Elenolide, Sinapic acid, 3-(3-hydroxy-4,5-dimethoxyphenyl)prop-2-enoic acid, 3-(4,5-dihydroxy-2,3-dimethoxyphenyl)prop-2-enal, 3-(6-hydroxy-7-methoxy-2H-1,3-benzodioxol-5-yl)propanal, 3-(7-hydroxy-6-methoxy-2H-1,3-benzodioxol-5-yl)propanal, 6-(3-hydroxyprop-1-en-1-yl)-4-methoxy-2H-1,3-benzodioxol-5-ol, 6-(3-hydroxyprop-1-en-1-yl)-5-methoxy-2H-1,3-benzodioxol-4-ol, 3-(4-hydroxy-3,5-dimethoxyphenyl…	HMDB0030018, HMDB0032616, HMDB0141325, HMDB0128665, HMDB0128667, HMDB0128668, HMDB0128673, HMDB0128674, HMDB0127488, HMDB0128183, HMDB0140920, HMDB0142075, HMDB0142169, HMDB0142170, HMDB0142171, HMDB0142172, HMDB0142173, HMDB0142174	1	1	1	2.47533e-05	2.14518e-05	1.52783e-05	2.24743e-05	1.44291e-05	9.62999e-06	0.401929	0.337068	Sinapic acid	PM
C10H12O6	M+H	C10H12O6+H+	229.071	3-(2,3,4-trihydroxy-5-methoxyphenyl)propanoic acid, 3-(2,4,5-trihydroxy-3-methoxyphenyl)propanoic acid, 2-(2,3,6-trihydroxy-4-methoxyphenyl)propanoic acid, 6-hydroxy-2,3,4-trimethoxybenzoic acid, 2-(2,3,5-trihydroxy-4-methoxyphenyl)propanoic acid, 2-hydroxy-3,4,5-trimethoxybenzoic acid	HMDB0125592, HMDB0125596, HMDB0125049, HMDB0142089, HMDB0125034, HMDB0141334	1	1	1	9.49437e-05	8.7474e-05	0.000118408	0.000141935	9.75632e-05	5.67633e-05	0.0220561	0.0185988	Carlosic acid	PM
C11H19NO4	M+H	C11H19NO4+H+	230.139	Butenylcarnitine	HMDB0013126	1	1	1	1.40965e-05	1.97466e-05	1.69891e-05	4.31416e-05	4.23857e-05	1.82626e-05	-1.02985	0.520875	Butenylcarnitine	FA
C11H22N2O3	M+H	C11H22N2O3+H+	231.17	Isoleucyl-Valine, Leucyl-Valine, Valyl-Isoleucine, Valyl-Leucine	HMDB0028920, HMDB0028942, HMDB0029130, HMDB0029131	1	1	1	1.4174e-05	3.65337e-05	1.64083e-05	2.39707e-05	8.13513e-05	1.44427e-05	-0.835474	0.215946	Isoleucyl-Valine	PM/AA
C12H16N2O3	M+H	C12H16N2O3+H+	237.123	Alanyl-Phenylalanine, Phenylalanyl-Alanine, O-Desmethyl-lacosamide	HMDB0028694, HMDB0028988, HMDB0060855	1	1	1	8.20131e-06	6.09123e-06	2.1612e-05	3.88342e-05	3.0728e-05	2.40177e-05	-1.38203	0.576611	Alanyl-Phenylalanine	PM/AA
C12H24N2O3	M+H	C12H24N2O3+H+	245.186	Isoleucyl-Isoleucine, Isoleucyl-Leucine, Leucyl-Isoleucine, Leucyl-Leucine	HMDB0028910, HMDB0028911, HMDB0028932, HMDB0028933	1	1	1	2.44906e-05	2.78561e-05	3.26483e-05	4.66768e-05	7.43698e-05	4.22229e-05	-0.941805	0.533385	Isoleucyl-Isoleucine	PM/AA
C5H12O7P2	M+H	C5H12O7P2+H+	247.013	Dimethylallylpyrophosphate, Isopentenyl pyrophosphate	HMDB0001120, HMDB0001347	1	1	1	2.18323e-05	1.24022e-05	2.05256e-05	2.6679e-05	3.05859e-05	3.23176e-05	-0.710091	0.576611	Dimethylallyl pyrophosphate	PR
C11H21NO5	M+H	C11H21NO5+H+	248.149	Hydroxybutyrylcarnitine, (R)-3-hydroxybutyrylcarnitine	HMDB0013127, HMDB0062735	1	1	1	1.98685e-05	2.27113e-05	2.23916e-05	3.51182e-05	4.84823e-05	2.37974e-05	-0.725091	0.501987	Hydroxybutyrylcarnitine	FA
C12H22O4	M+NH4	C12H22O4+NH4+	248.186	Dodecanedioic acid, Bis(1-methylethyl) hexanedioate, Dipropyl hexanedioate	HMDB0000623, HMDB0041613, HMDB0041614	1	1	1	3.41898e-05	4.37101e-05	1.95305e-05	5.53902e-05	8.0846e-05	3.26208e-05	-0.793359	0.464983	Dodecanedioic acid	FA
C13H18N2O3	M+H	C13H18N2O3+H+	251.139	Paucine, 3-Hydroxymelatonin, (2E)-N-(4-aminobutyl)-3-(3,4-dihydroxyphenyl)prop-2-enimidic acid, N-(4-aminobutyl)-3-(4-hydroxyphenyl)oxirane-2-carboximidic acid, N-(4-aminobutyl)-3-(3,4-dihydroxyphenyl)prop-2-enimidic acid, (2E)-N-(3-aminopropyl)-3-(4-hydroxy-3-methoxyphenyl)prop-2-enimidic acid	HMDB0029876, HMDB0060742, HMDB0139529, HMDB0139530, HMDB0139613, HMDB0139973	1	1	1	1.51874e-06	5.69507e-07	3.82372e-06	5.76642e-06	2.81204e-06	4.95152e-06	-1.19445	0.520875	3-Hydroxymelatonin	PM
C11H17NO6	M+H	C11H17NO6+H+	260.113	Fumarycarnitine, Osmaronin	HMDB0013134, HMDB0032769	1	1	1	7.2658e-06	5.9356e-06	4.67428e-06	1.18279e-05	8.96107e-06	1.96285e-06	-0.347981	0.152123	Fumarycarnitine	FA
C12H20O6	M+H	C12H20O6+H+	261.133	Glycerol tripropanoate	HMDB0032857	1	1	1	0.000118226	0.00012954	0.000125388	7.53323e-05	7.3968e-05	3.76741e-05	0.99693	0.576611	Glycerol tripropanoate	PM
C16H20O3	M+H	C16H20O3+H+	261.149	10-Hydroxy-3-methoxy-1,3,5,7-cadinatetraen-9-one, 2-(hydroxymethyl)-2-(4-methylpent-3-en-1-yl)-2H-chromen-8-ol, 2-methyl-2-(4-methylpent-3-en-1-yl)-2H-chromene-6,8-diol, 2-methyl-2-(4-methylpent-3-en-1-yl)-2H-chromene-7,8-diol, 2-[2-(3,3-dimethyloxiran-2-yl)ethyl]-2-methyl-2H-chromen-8-ol, 5-methyl-5-(4-methylpent-3-en-1-yl)-3,6-dioxatricyclo[5.4.0.0Â²,â´]undeca-1(7),8,10-trien-8-ol, 2-(2-hydrox…	HMDB0036456, HMDB0134719, HMDB0134722, HMDB0134724, HMDB0134726, HMDB0134728, HMDB0134730, HMDB0134736	1	1	1	0	5.7304e-07	2.85713e-07	5.25796e-07	7.80516e-07	0	-0.605183	0.156919	lahorenoic acid A	FA
C13H25NO3	M+NH4	C13H25NO3+NH4+	261.217	N-Undecanoylglycine	HMDB0013286	1	1	1	2.03303e-06	5.36886e-06	8.31857e-06	7.69865e-06	1.2619e-05	9.66476e-06	-0.931475	0.533385	N-Undecanoylglycine	PM
C12H23NO4	M+NH4	C12H23NO4+NH4+	263.197	2-Methylbutyroylcarnitine, Isovalerylcarnitine, Valerylcarnitine, Pivaloylcarnitine	HMDB0000378, HMDB0000688, HMDB0013128, HMDB0041993	1	1	1	2.51449e-06	6.13859e-06	1.72674e-06	2.62415e-06	1.40629e-05	2.54029e-07	-0.706744	0.136586	2-Methylbutyroylcarnitine	FA
C14H20N2O3	M+H	C14H20N2O3+H+	265.155	Phenylalanyl-Valine, Valyl-Phenylalanine, (2E)-N-(4-aminobutyl)-3-(4-hydroxy-3-methoxyphenyl)prop-2-enimidic acid, N-(4-aminobutyl)-3-(4-hydroxy-3-methoxyphenyl)prop-2-enimidic acid	HMDB0029008, HMDB0029134, HMDB0139553, HMDB0139638	1	1	1	8.8543e-07	1.36345e-06	5.55694e-06	7.69319e-06	4.39661e-06	6.42189e-06	-1.24581	0.520875	Phenylalanyl-Valine	PM/AA
C18H22NO	M+H	C18H22NO+H+	269.177	N-(p-Hydroxyphenethyl)actinidine	HMDB0030347	1	1	1	6.90755e-06	1.36912e-05	4.27786e-06	2.91596e-07	5.14913e-07	0	4.94696	0.533385	Gel Component	PM
C12H14O7	M+H	C12H14O7+H+	271.081	Phenylglucuronide, Phenol glucuronide, 3,4,5-trihydroxy-6-phenoxyoxane-2-carboxylic acid	HMDB0059806, HMDB0060014, HMDB0135168	1	1	1	4.95562e-05	3.8707e-05	3.96015e-05	4.90717e-05	2.95478e-05	1.57014e-05	0.438968	0.321073	Phenol glucuronide	PM
C13H25NO5	M+H	C13H25NO5+H+	276.181	Hydroxyhexanoycarnitine	HMDB0013131	1	1	1	8.02856e-06	8.48069e-06	1.33105e-05	3.11494e-05	3.21226e-05	1.4771e-05	-1.388	0.537298	Hydroxyhexanoycarnitine	FA
C20H30O	M+H	C20H30O+H+	287.237	Vitamin A, 11-cis-Retinol, 9-cis-Retinol, 13-cis Retinol, (x)-p-Menth-1-en-4-yl 5-isopropyl-2-methylphenyl ether, Abietinal, ent-16-Kauren-19-al, ent-19-Trachylobanal, 8,13-Abietadien-18-al	HMDB0000305, HMDB0006216, HMDB0006217, HMDB0006221, HMDB0030403, HMDB0034735, HMDB0036728, HMDB0036841, HMDB0038709	1	1	1	0.000142784	7.20778e-05	3.59039e-05	0.000158612	0.000104177	7.45099e-05	-0.427686	0.215946	Vitamin A	PR
C9H18NO8P	M+H	C9H18NO8P+H+	300.084	D-4'-Phosphopantothenate	HMDB0001016	1	1	1	2.41509e-06	3.03087e-06	6.4969e-06	1.1259e-05	1.0927e-05	4.74747e-06	-1.17325	0.520875	D-4'-Phosphopantothenate	PM
C20H30O2	M+H	C20H30O2+H+	303.232	Eicosapentaenoic acid, Retinyl ester, 8,15-Isopimaradien-18-oic acid, Siderone, Yucalexin B14, Yucalexin A16, 8(17),12-Labdadiene-15,16-dial, Isopimaric acid, Cascarillone, 8,13-Abietadien-18-oic acid, (ent-15beta,16beta)-15,16-Epoxy-3-kauranone, ent-8(17),13(16),14-Labdatrien-18-oic acid	HMDB0001999, HMDB0003598, HMDB0035692, HMDB0036703, HMDB0036709, HMDB0036775, HMDB0036805, HMDB0036811, HMDB0036826, HMDB0038172, HMDB0038687, HMDB0039486	1	1	1	5.66662e-05	1.7835e-05	5.43301e-06	2.47018e-05	1.27183e-05	5.17306e-06	0.908191	0.215946	Eicosapentaenoic acid	FA
C20H32O2	M+H	C20H32O2+H+	305.248	Arachidonic acid, Cis-8,11,14,17-Eicosatetraenoic acid, Mesterolone, Sideridiol, ent-17-Hydroxy-16beta-kauran-19-al, Yucalexin P21, Copalic acid, Junicedral, 7,13-Eperudien-15-oic acid, Oryzalexin S, Oryzalexin E	HMDB0001043, HMDB0002177, HMDB0006036, HMDB0036702, HMDB0036721, HMDB0036754, HMDB0036829, HMDB0036830, HMDB0037824, HMDB0039687, HMDB0039702	1	1	1	0.000930037	0.000387439	0.000181598	0.000972348	0.000526231	0.000367189	-0.315697	0.123841	Arachidonic acid	FA
C20H34O	M+NH4	C20H34O+NH4+	308.295	Presphaerol, (-)-Dilophol, 8-[3]-ladderane-1-octanol, cis-9,10-Epoxy-1,3Z,6Z-eicosatriene, 5-(1-methoxybutan-2-yl)isolongifol-5-ene, Geranylgeraniol, aphidicolan-16beta-ol, Verrucosan-2b-ol, (+)-Verticillol, (+)-Tormesol, (Z,Z,Z)-geranylgeraniol, tuberculosinol	LMPR0104220002, LMPR0104450002, LMFA05000066, LMFA12000308, LMPR0103500014, LMPR0104010009, LMPR0104160002, LMPR0104280002, LMPR0104380001, LMPR0104530001, LMPR0104010018, LMPR0104030005	1	1	1	1.25925e-05	1.09928e-05	2.01283e-05	3.98301e-05	5.74773e-05	2.06943e-05	-1.43265	0.520875	FA(20:3)	FA
C20H36O	M+NH4	C20H36O+NH4+	310.31	9S,10R-Epoxy-3Z,6Z-eicosadiene, 6R,7S-Epoxy-3Z,9Z-eicosadiene, 6S,7R-Epoxy-3Z,9Z-eicosadiene, 3,4-Epoxy-6Z,9Z-eicosadiene, 3,7,11,15-Tetramethyl-6,10,14-hexadecatrien-1-ol, 9R,10S-Epoxy-3Z,6Z-eicosadiene	LMFA12000310, LMFA12000311, LMFA12000312, LMFA12000313, LMFA05000210, LMFA12000309	1	1	1	8.95958e-06	7.09585e-06	1.17836e-05	2.61453e-05	3.94032e-05	1.62738e-05	-1.55539	0.533385	FA(20:2)	FA
C22H30O	M+H	C22H30O+H+	311.237	14'-apo-beta-carotenal, (11Z)-8,18-ethanoretinal, Desogestrel	LMPR01070297, LMPR01090043, LMST02030104	1	1	1	2.43079e-05	5.37628e-06	2.22648e-06	3.52378e-05	1.24106e-05	1.01226e-05	-0.856305	0.236067	FA(22:7)	FA
C11H19N3O6S	M+H	C11H19N3O6S+H+	322.107	L-L-Homoglutathione	HMDB0029395	1	1	1	4.06499e-05	4.52093e-05	2.51063e-05	2.57496e-05	3.53652e-05	1.45381e-05	0.552647	0.447557	L-L-Homoglutathione	PM
C20H35NO2	M+H	C20H35NO2+H+	322.274	Anandamide (18:3,n-6), Anandamide (18:3,n-3)	LMFA08040003, LMFA08040007	1	1	1	0.00016789	9.12385e-05	4.9343e-05	0.000419439	0.000270479	8.96753e-05	-1.33758	0.451989	Anandamide (18:3,n-3)	FA
C21H36O	M+NH4	C21H36O+NH4+	322.31	pregnan-21-ol, 3-pentadecylphenol, 9S,10R-Epoxy-1,3Z,6Z-heneicosatriene	LMST02030174, LMPK15010004, LMFA12000319	1	1	1	2.60695e-05	2.11096e-05	4.95093e-05	7.93509e-05	0.000127584	5.31987e-05	-1.42784	0.533385	pregnan-21-ol	ST
C20H37NO2	M+H	C20H37NO2+H+	324.29	Linoleoyl ethanolamide	HMDB0012252	1	1	1	6.36816e-06	2.60341e-06	6.71184e-06	4.28159e-06	5.59038e-06	4.32712e-06	0.143441	0.103473	Linoleoyl ethanolamide	FA
C22H32O2	M+H	C22H32O2+H+	329.248	Docosahexaenoic acid, Neogrifolin, Grifolin, Retinol acetate	HMDB0002183, HMDB0030053, HMDB0030446, HMDB0035185	1	1	1	0.000412633	0.000155342	6.26728e-05	0.000541917	0.000229513	0.000161908	-0.565565	0.191121	Docosahexaenoic acid	FA
C18H35NO4	M+H	C18H35NO4+H+	330.264	4,8 Dimethylnonanoyl carnitine, Undecanoylcarnitine	HMDB0006202, HMDB0013321	1	1	1	1.35234e-05	6.55924e-06	9.70398e-06	4.04086e-05	3.04968e-05	1.88869e-05	-1.59193	0.574153	Undecanoylcarnitine	FA
C22H36O2	M+H	C22H36O2+H+	333.279	Adrenic acid, 1-Hydroxy-1-phenyl-3-hexadecanone, 3-Hydroxy-1-phenyl-1-hexadecanone, Ethyl Arachidonate	HMDB0002226, HMDB0035676, HMDB0035677, HMDB0062725	1	1	1	7.8246e-05	3.2643e-05	4.90149e-06	7.32212e-05	5.02169e-05	1.30389e-05	-0.237141	0.0733297	Adrenic acid	FA
C10H16N4O7S	M+H	C10H16N4O7S+H+	337.081	S-Nitrosoglutathione	HMDB0004645	1	1	1	7.83677e-07	2.76456e-06	6.69495e-07	7.43186e-06	5.32808e-06	1.14649e-06	-1.72121	0.474703	S-Nitrosoglutathione	PM
C22H35NO2	M+H	C22H35NO2+H+	346.274	Anandamide (20:5,n-3)	LMFA08040008	1	1	1	0.00016038	7.65277e-05	3.46688e-05	0.000469263	0.000217584	7.6014e-05	-1.49006	0.398727	Anandamide (20:5,n-3)	FA
C23H34O2	M+NH4	C23H34O2+NH4+	360.29	TrHA, 6Z,8E-tricosdien-4,19-diynoic acid	LMFA01030853, LMFA01031128	1	1	1	8.44731e-06	3.49316e-06	1.00939e-06	1.6223e-05	1.38965e-05	4.98308e-06	-1.43864	0.520875	TrHA	FA
C27H46O	M-H2O+H	C27H44-H2O+H+	369.352	Cholesterol	LMST01010001	1	1	1	0.00244538	0.00151033	0.00138846	0.00205	0.00221962	0.00224393	-0.285478	0.324738	Cholesterol	ST
C23H38O4	M+H	C23H38O4+H+	379.284	2-Arachidonylglycerol, MG(0:0/20:4(8Z,11Z,14Z,17Z)/0:0), MG(20:4(5Z,8Z,11Z,14Z)/0:0/0:0), MG(20:4(8Z,11Z,14Z,17Z)/0:0/0:0), 1-Acetoxy-2-hydroxy-5,12,15-heneicosatrien-4-one, Persenone A	HMDB0004666, HMDB0011549, HMDB0011578, HMDB0011579, HMDB0035273, HMDB0036568	1	1	1	6.63493e-06	1.132e-05	5.47832e-06	3.26179e-05	4.00551e-05	1.36029e-05	-1.8804	0.533385	2-Arachidonylglycerol	GL
C23H43NO3S	M+NH4	C23H43NO3S+NH4+	431.33	N-oleoyl methionine	LMFA08020110	1	1	1	7.88131e-07	8.58817e-07	2.43276e-06	1.03042e-05	7.17133e-06	9.90651e-07	-2.17835	0.473644	N-oleoyl methionine	FA
C27H44O4	M+NH4	C27H44O4+NH4+	450.358	24-Hydroxycalcitriol, 3beta,7alpha-Dihydroxy-5-cholestenoate, Neochlorogenin, Rockogenin, 23S,25,26-Trihydroxyvitamin D3, 4-cholesten-7Î±,12Î±,24-triol-3-one, 7alpha,12alpha,26-trihydroxycholest-4-en-3-one, 1alpha,23(S),25-trihydroxyvitamin D3, 3alpha,7beta-dihydroxy-5beta-cholest-24-en-26-oic Acid	HMDB0006228, HMDB0012454, HMDB0030702, HMDB0033769, HMDB0060134, HMDB0062399, HMDB0062400, HMDB0062686, HMDB0062712	1	1	1	1.63156e-06	2.63399e-06	5.61174e-06	1.48162e-05	1.33773e-05	4.01875e-06	-1.70542	0.520875	Calcitetrol	ST
C21H42NO8P	M+NH4	C21H42NO8P+NH4+	485.299	PE(8:0/8:0)	LMGP02010102	1	1	1	1.59992e-05	2.31061e-05	1.96843e-05	3.84511e-06	1.35834e-05	1.20068e-05	0.998012	0.576611	PE(16:0)	GP
C4H4N2O2	M+H	C4H4N2O2+H+	113.035	Uracil, 4-Carboxypyrazole	HMDB0000300, HMDB0060760	0	1	1	3.34334e-05	2.17793e-05	3.15688e-05	5.42543e-05	3.2198e-05	4.23488e-05	-0.569685	0.520875	Uracil	PM
C10H13NO2	M+H	C10H13NO2+H+	180.102	3,5-Dimethylphenyl methylcarbamate, 2(N)-Methyl-norsalsolinol, (R)-Salsolinol, Maltoxazine, 1,2,3,4,5,6-Hexahydro-5-(1-hydroxyethylidene)-7H-cyclopenta[b]pyridin-7-one, Salsolinol	HMDB0031811, HMDB0001189, HMDB0005199, HMDB0030372, HMDB0039655, HMDB0042012	0	1	1	9.09559e-05	0.000158351	0.000462771	0.000153938	0.000166772	0.00017953	0.509412	0.167666	alpha-Methylphenylalanine	PM
C11H15NO2	M+H	C11H15NO2+H+	194.118	(R)-N-Methylsalsolinol, (S)-N-Methylsalsolinol, (-)-Salsoline, (R)-1,2-dimethyl-5,6-dihydroxy-tetrahydroisoquinoline, 2-Isopropylphenyl methylcarbamate	HMDB0003626, HMDB0003892, HMDB0012469, HMDB0012484, HMDB0031797	0	1	1	4.21277e-05	6.30546e-05	9.56055e-05	9.53447e-05	8.87967e-05	0.000115275	-0.576483	0.520875	(-)-Salsoline	PM
C3H8O3	M+H	C3H8O3+H+	93.0546	Glycerol	HMDB0000131	1	0	1	1.63306e-05	1.61299e-05	5.5677e-06	5.54661e-06	4.73478e-06	2.9686e-06	1.52108	0.520875	Glycerol	PM
C5H5N5	M+H	C5H5N5+H+	136.062	Adenine	HMDB0000034	1	0	1	0.000147613	0.000104337	8.96351e-05	0.000120853	0.000149733	0.000106744	-0.143578	0.164054	Adenine	PM
C11H13NO2	M+H	C11H13NO2+H+	192.102	5-Methoxytryptophol	HMDB0001896	1	0	1	5.72969e-05	5.25091e-05	5.7349e-05	0.000112934	0.000113748	6.98651e-05	-0.827076	0.536357	5-Methoxytryptophol	PM
C9H17O7P	M+H	C9H17O7P+H+	269.078	DHAP(6:0)	HMDB0011679	1	0	1	1.76968e-06	4.5715e-06	3.73134e-07	0	0	0	Only in Lesion	0.474703	DHAP(6:0)	PM
C18H32O2	M+H	C18H32O2+H+	281.248	Linoleic acid, Bovinic acid, 9E,11E-Octadecadienoic acid, 10E,12Z-Octadecadienoic acid, Linoelaidic acid, Mangiferic acid, Linalyl caprylate, Ethyl 2E,4Z-hexadecadienoate, 5-Octadecynoic acid, Dihomolinoleic acid, 6Z,9Z-octadecadienoic acid, Octadecadienoate	HMDB0000673, HMDB0003797, HMDB0005047, HMDB0005048, HMDB0006270, HMDB0029800, HMDB0030430, HMDB0031051, HMDB0031097, HMDB0061864, HMDB0062238, HMDB0062784	1	0	1	7.02222e-05	2.70044e-05	1.9713e-05	2.94934e-05	2.02365e-05	2.50371e-05	0.645292	0.233205	Linoleic acid	FA
C18H34O2	M+H	C18H34O2+H+	283.263	Oleic acid, Elaidic acid, Vaccenic acid, (Z)-13-Octadecenoic acid, Ethyl 9-hexadecenoate, (E)-13-Octadecenoic acid, 7Z-octadecenoic acid, Octadec-9-enoic Acid	HMDB0000207, HMDB0000573, HMDB0003231, HMDB0041480, HMDB0059871, HMDB0062218, HMDB0062242, HMDB0062703	1	0	1	0.00029577	9.87985e-05	7.52453e-05	0.000271967	0.000164581	0.000122234	-0.250195	0.105834	Oleic acid, Elaidic acid, Vaccenic acid	FA
C18H36O2	M+H	C18H36O2+H+	285.279	Stearic acid, Ethyl hexadecanoate, 16-Methylheptadecanoic acid, Hexyl dodecanoate	HMDB0000827, HMDB0029811, HMDB0031066, HMDB0061946	1	0	1	0.000119079	4.68158e-05	2.59961e-05	0.000130382	7.3221e-05	5.5288e-05	-0.43206	0.18227	Stearic acid	FA
C19H40O3	M+H	C19H40O3+H+	317.305	1-Hexadecylglycerol, 1,2,4-Nonadecanetriol	LMGL01020032, LMFA05000577	1	0	1	1.95016e-05	4.89318e-06	1.44775e-07	3.22889e-07	0	0	6.24793	0.394337	1-Hexadecylglycerol	PM
C21H32O2	M+NH4	C21H32O2+NH4+	334.274	Pregnenolone, 20a-Dihydroprogesterone, 5a-Pregnane-3,20-dione, Ethyltestosterone, Bolasterone, (3beta,5alpha)-3-Hydroxypregn-16-en-20-one, Kaurenoic acid methyl ester, 5-alpha-Pregnan-3,20-dione	HMDB0000253, HMDB0003069, HMDB0003759, HMDB0006002, HMDB0006048, HMDB0034369, HMDB0036729, HMDB0059652	1	0	1	4.83063e-06	2.21692e-06	8.30197e-07	1.10445e-05	7.6663e-06	1.2091e-06	-1.33835	0.394337	Pregnenolone	ST
C22H37NO2	M+H	C22H37NO2+H+	348.29	Anandamide, O-Arachidonoyl Ethanolamine	HMDB0004080, HMDB0013655	1	0	1	6.36784e-06	5.60494e-07	2.71569e-07	7.33381e-06	4.57004e-06	9.51959e-07	-0.83637	0.21074	Anandamide (20:4,n-6)	FA
C22H39NO2	M+H	C22H39NO2+H+	350.305	Anandamide (20:3,n-3), Dihomo-gamma-linolenoyl-EA, Mead Acid-EA	LMFA08040005, LMFA08040011, LMFA08040037	1	0	1	1.65126e-05	7.88148e-06	2.29855e-06	4.42845e-05	3.35036e-05	3.57693e-06	-1.60797	0.418168	Anandamide (20:3,n-3)	FA
C11H17N3O7S	M+NH4	C11H17N3O7S+NH4+	353.113	S-Formylglutathione	HMDB0001550	1	0	1	1.76088e-06	2.45191e-06	3.57851e-06	7.87578e-06	5.72732e-06	1.75322e-06	-0.978897	0.394727	S-Formylglutathione	PM
C25H37NO2	M+H	C25H37NO2+H+	384.29	Macamide	LMFA08020160	1	0	1	4.70998e-06	6.6074e-07	8.5621e-07	8.53409e-06	5.85876e-06	1.13476e-06	-1.31824	0.394337	Macamide	FA
C27H52O4	M+NH4	C27H52O4+NH4+	458.42	MG(0:0/24:1(15Z)/0:0), MG(24:1(15Z)/0:0/0:0)	HMDB0011559, HMDB0011589	1	0	1	8.322e-07	1.27944e-06	2.97362e-06	8.38008e-06	5.85016e-06	1.13919e-06	-1.59567	0.447557	MG(24:1)	GL
C4H4N2	M+H	C4H4N2+H+	81.0447	Pyrimidine	HMDB0003361	0	0	1									Pyrimidine	PM
C18H32O	M+H	C18H32O+H+	265.253	9Z,12Z-Octadecadienal, 11E,14E-Octadecadienal, 2E,13Z-Octadecadienal, 3Z,13Z-Octadecadienal, 6S,7R-Epoxy-3Z,9Z-octadecadiene, 3,4-Epoxy-6,9-octadecadiene, 5-(1-hydroxypropan-2-yl)isolongifolane, 9,12,15-Octadecatrien-1-ol, 9,12-octadecadienal, 3E,13Z-Octadecadienal, 11Z,13Z-Octadecadienal, 13Z,15Z-Octadecadienal, 9S,10R-Epoxy-6Z-octadecene	LMFA06000242, LMFA06000233, LMFA06000234, LMFA06000241, LMFA12000287, LMFA12000288, LMPR0103500010, LMFA05000216, LMFA06000101, LMFA06000235, LMFA06000239, LMFA06000240, LMFA12000284	0	0	1									FA(18:2)	FA
C20H34O2	M+H	C20H34O2+H+	307.263	8,11,14-Eicosatrienoic acid, 5,8,11-Eicosatrienoic acid, Sciadonic acid, Sagittariol, 11,14,17-Eicosatrienoic acid	HMDB0002925, HMDB0010378, HMDB0031058, HMDB0036835, HMDB0060039	0	0	1									11,14,17-eicosatrienoic acid	FA
C20H39NO2	M+H	C20H39NO2+H+	326.305	N-Oleoylethanolamine	HMDB0002088	0	0	1									N-Oleoylethanolamine	FA
C22H34O2	M+H	C22H34O2+H+	331.263	Docosapentaenoic acid (22n-6), Docosapentaenoic acid, Ethyl abietate, ent-16-Kauren-19-ol acetate, 4,8,12,15,19-Docosapentaenoic acid, Ethyl icosapentate	HMDB0001976, HMDB0006528, HMDB0032257, HMDB0035024, HMDB0039133, HMDB0039530	0	0	1									Docosapentaenoic acid	FA
C13H18N2O	M+H	C13H18N2O+H+	219.149	5-Methoxydimethyltryptamine, N-despropyl ropinirole	HMDB0002004, HMDB0060625	1	1	0	8.43756e-07	1.21197e-06	2.78169e-06	5.70953e-06	5.02959e-06	1.57053e-06	-1.34748	0.501987	5-Methoxydimethyltryptamine	PM
C3H3NS	M+H	C3H3NS+H+	86.0059	Thiazole	HMDB0029713	0	1	0									Thiazole	PM
C4H6O2	M+H	C4H6O2+H+	87.0441	Gamma-Butyrolactone, Oxolan-3-one, Diacetyl, But-2-enoic acid, Ethenyl acetate, Isocrotonic acid	HMDB0000549, HMDB0002523, HMDB0003407, HMDB0010720, HMDB0031209, HMDB0034439	0	1	0									Gamma-Butyrolactone	FA
C4H9N3O2	M+H	C4H9N3O2+H+	132.077	Creatine, Beta-Guanidinopropionic acid	HMDB0000064, HMDB0013222	0	1	0									Creatine	PM
C7H6O3	M+H	C7H6O3+H+	139.039	4-Hydroxybenzoic acid, Gentisate aldehyde, 2-Methoxy-1,4-benzoquinone, keratan sulfate II (core 2-linked),degradation product 1	HMDB0000500, HMDB0004062, HMDB0032576, HMDB0062484	0	1	0									4-Hydroxybenzoic acid	PM
C7H8O3	M+H	C7H8O3+H+	141.055	Ethyl maltol, 2-methoxybenzene-1,4-diol, 3-methoxybenzene-1,2-diol, 4-methoxybenzene-1,3-diol, 5-methoxybenzene-1,3-diol, 2-methoxybenzene-1,3-diol, 4-methoxybenzene-1,2-diol	HMDB0031735, HMDB0137138, HMDB0125538, HMDB0125014, HMDB0132905, HMDB0133970, HMDB0137137	0	1	0									3-Methoxycatechol	PM
C7H11N3O	M+H	C7H11N3O+H+	154.097	N-Acetylhistamine	HMDB0013253	0	1	0									N-Acetylhistamine	PM
C9H10O4	M+H	C9H10O4+H+	183.065	Hydroxyphenyllactic acid, 2',6'-Dihydroxy-4'-methoxyacetophenone, Homovanillic acid, Isohomovanillic acid, 3-(3-Hydroxyphenyl)-3-hydroxypropanoic acid, 3-Methoxy-4-hydroxyphenylglycolaldehyde, 2,6-Dimethoxybenzoic acid, 3-(3,5-dihydroxyphenyl)propanoic acid, 3,5-dimethoxybenzoic acid, 4-ethenyl-6-methoxybenzene-1,2,3-triol, 5-ethenyl-3-methoxybenzene-1,2,4-triol, 2-hydroxy-2-(4-methoxyphenyl)acet…	HMDB0000755, HMDB0029646, HMDB0000118, HMDB0000333, HMDB0002643, HMDB0004061, HMDB0029273, HMDB0125533, HMDB0127495, HMDB0125591, HMDB0125595, HMDB0140294, HMDB0124923, HMDB0126386, HMDB0129348, HMDB0134042, HMDB0134043, HMDB0131428, HMDB0133494, HMDB0133788, HMDB0140892	0	1	0									Hydroxyphenyllactic acid	PM
C7H11NO5	M+H	C7H11NO5+H+	190.071	Glutarylglycine, N-Acetylglutamic acid	HMDB0000590, HMDB0001138	0	1	0									N-Acetylglutamic acid	PM
C10H13N3O	M+H	C10H13N3O+H+	192.113	4-Hydroxydebrisoquine, N'-nitrosoanabasine	HMDB0006468, HMDB0041939	0	1	0									4-Hydroxydebrisoquine	PM
C9H15N3O2	M+H	C9H15N3O2+H+	198.124	L-Histidine trimethylbetaine	HMDB0029422	0	1	0									L-Histidine trimethylbetaine	PM
C10H13N5O4	M+H	C10H13N5O4+H+	268.104	Adenosine, Deoxyguanosine	HMDB0000050, HMDB0000085	0	1	0									Adenosine	PM
C15H22N2O3	M+H	C15H22N2O3+H+	279.17	Leucyl-phenylalanine, Isoleucyl-Phenylalanine, Phenylalanyl-Isoleucine, keratan sulfate I	HMDB0013243, HMDB0028914, HMDB0028998, HMDB0062483	0	1	0									Leucyl-phenylalanine	AA
C13H26O5	M+NH4	C13H26O5+NH4+	280.212	Glyceryl 5-hydroxydecanoate	HMDB0032297	0	1	0									Glyceryl 5-hydroxydecanoate	PM
C15H29NO5	M+H	C15H29NO5+H+	304.212	3-hydroxyoctanoyl carnitine	HMDB0061634	0	1	0									3-hydroxyoctanoyl carnitine	FA
C6H12N4	M+H	C6H12N4+H+	141.113	Metenamine	HMDB0029598	1	0	0									Metenamine	PM
Lipid Mass Range
						Replicate Detection			Lesion (TIC-Normalized Average Ion Abundance)			Healthy (TIC-Normalized Average Ion Abundance)
formula	adduct	ion	mz	moleculeNames	moleculeIds	I	II	III	I	II	III	I	II	III	log2(Fold Change) (Lesion/Healthy)	"-log10(BH-Adjusted P-Value)"	Selected Annotation	Category	Gel Component
C7H9N3O4	M+H	C7H9N3O4+H+	200.067	(S)-Isowillardiine	HMDB0030376	1	1	1	7.73086e-05	0.00010594	0.000711892	0	0	0	Only in Lesion	0.323181	(S)-Isowillardiine/Willardine	PM	Edge
C16H32O2	M+H	C16H32O2+H+	257.248	Ethyl tetradecanoate, Palmitic acid, Trimethyltridecanoic acid, Isopalmitic acid, Butyl dodecanoate, Dodecyl butyrate, Hexyl decanoate, Octyl octanoate, Dodecyl 2-methylpropanoate	HMDB0034153, HMDB0000220, HMDB0002396, HMDB0031068, HMDB0032065, HMDB0032249, HMDB0032324, HMDB0033166, HMDB0036210	1	0	1	0.00207453	0.00150926	0.000910584	0.00134246	0.0011935	0.000797874	0.43094	0.262561	Palmitic acid	FA	Edge
C18H36O2	M+H	C18H36O2+H+	285.279	Stearic acid, Ethyl hexadecanoate, 16-Methylheptadecanoic acid, Hexyl dodecanoate	HMDB0000827, HMDB0029811, HMDB0031066, HMDB0061946	1	1	1	0.00114531	0.000873903	0.000511876	0.00099378	0.000788788	0.00047475	0.165147	0.0945349	Stearic acid	FA	Edge
C11H13NO3	M+H	C11H13NO3+H+	208.097	N-Acetyl-L-phenylalanine, 3-Phenylpropionylglycine, Phenylpropionylglycine, N-isopropylterephthalamic acid	HMDB0000512, HMDB0002042, HMDB0000860, HMDB0060608	1	1	1	0.000108845	0.000104138	0.000291418	0.000222359	0.00026107	0.000380823	-0.77688	0.371932	N-Acetyl-L-phenylalanine	PM	Yes
C18H35NO	M+H	C18H35NO+H+	282.279	Oleamide	HMDB0002117	1	1	1	0.000240941	0.000221441	0.000736123	0.000862265	0.00125357	0.00151846	-1.60044	0.641558	Oleamide	FA	Yes
C19H36O3	M+H	C19H36O3+H+	313.274	10-oxo-nonadecanoic acid, 2-oxo-nonadecanoic acid, 18-oxo-nonadecanoic acid, 3-oxo-nonadecanoic acid	LMFA01060128, LMFA01060130, LMFA01060129, LMFA01060131	1	1	1	0.000504721	0.000420558	0.00051111	0.000644636	0.000644375	0.000509566	-0.324409	0.507958	3-oxo-nonadecanoic acid	FA	Yes
C18H37NO	M+H	C18H37NO+H+	284.295	Stearamide	LMFA08010003	0	1	0									Stearamide	FA	Yes
C10H19NO3	M+H	C10H19NO3+H+	202.144	Capryloylglycine, Valproylglycine	HMDB0000832, HMDB0013116	1	1	1	0.000194723	0.000207206	0.000255945	0.000428187	0.000265474	0.000252591	-0.524414	0.371932	Valproylglycine	PM
C9H17NO4	M+H	C9H17NO4+H+	204.123	L-Acetylcarnitine	HMDB0000201	1	1	1	0.000297908	0.000260623	0.000285724	0.000516005	0.000535367	0.000367879	-0.749378	0.621879	L-Acetylcarnitine	FA
C7H12N2O5	M+H	C7H12N2O5+H+	205.082	L-beta-aspartyl-L-alanine, gamma-Glutamylglycine, Alanyl-Aspartic acid, Aspartyl-Alanine, Glutamylglycine	HMDB0011162, HMDB0011667, HMDB0028683, HMDB0028746, HMDB0028819	1	1	1	0.000189763	0.000150816	0.000225863	0.000315062	0.000299607	0.000202682	-0.529026	0.449573	Aspartyl-Alanine	PM
C11H12N2O2	M+H	C11H12N2O2+H+	205.097	3-Hydroxymethylantipyrine, D-Tryptophan, (Â±)-Tryptophan, S-nirvanol, Nirvanol, 4-Hydroxyantipyrine	HMDB0013840, HMDB0013609, HMDB0030396, HMDB0060967, HMDB0060533, HMDB0060878	1	1	1	2.86545e-05	2.6428e-05	6.86931e-05	7.77628e-05	0.000115866	0.000140225	-1.43149	0.641558	D-Tryptophan	PM
C9H16O4	M+NH4	C9H16O4+NH4+	206.139	cis- and trans-Ethyl 2,4-dimethyl-1,3-dioxolane-2-acetate, (+/-)-Ethyl 3-acetoxy-2-methylbutyrate, (+/-)-Methyl 5-acetoxyhexanoate, 3-Methylsubericacid, Azelaic acid	LMFA07010803, LMFA07010695, LMFA07010697, LMFA01030981, LMFA01170054	1	1	1	0.000187447	0.000216655	0.000275735	0.00025708	0.000287523	0.000276294	-0.272013	0.371932	Azelaic acid	FA
C11H10O4	M+H	C11H10O4+H+	207.065	Isoeugenitol, Eugenitol, Vinyl caffeate, 1-(6-hydroxy-4-methoxy-1-benzofuran-5-yl)ethan-1-one, 6-(hydroxymethyl)-7-methoxy-2H-chromen-2-one	HMDB0029472, HMDB0029466, HMDB0029775, HMDB0129368, HMDB0136784	1	1	1	0.000194037	0.000196912	0.000241772	0.000120968	0.000154629	0.000126834	0.652825	0.803745	Isoeugenitol	PM
C11H13NO2	M+NH4	C11H13NO2+NH4+	209.128	5-Methoxytryptophol	HMDB0001896	1	1	1	8.08648e-05	7.08296e-05	0.000220646	0.000258355	0.000289161	0.000409054	-1.36125	0.641558	5-Methoxytryptophol	PM
C10H10O5	M+H	C10H10O5+H+	211.06	Vanilpyruvic acid, 3-(4-hydroxy-3-methoxyphenyl)oxirane-2-carboxylic acid, (2E)-3-(2,4-dihydroxy-3-methoxyphenyl)prop-2-enoic acid, (2E)-3-(2,4-dihydroxy-5-methoxyphenyl)prop-2-enoic acid, 3-(3,4-dihydroxy-5-methoxyphenyl)prop-2-enoic acid, 3-(2,4-dihydroxy-5-methoxyphenyl)prop-2-enoic acid, 3-(2,4-dihydroxy-3-methoxyphenyl)prop-2-enoic acid, 3-(2,3-dihydroxy-4-methoxyphenyl)prop-2-enoic acid, 3-…	HMDB0011714, HMDB0125516, HMDB0125515, HMDB0125514, HMDB0127490, HMDB0127946, HMDB0127947, HMDB0132221, HMDB0132228, HMDB0140909, HMDB0141258, HMDB0141331, HMDB0142176, HMDB0142177, HMDB0142178, HMDB0142180, HMDB0142181	1	1	1	0.000396483	0.000379134	0.000826271	0.000267693	0.000292142	0.000103714	1.2715	0.389951	Vanilpyruvic acid	PM
C10H11NO3	M+NH4	C10H11NO3+NH4+	211.108	p-Methylhippuric acid, Phenylacetylglycine, Methyl hippurate, 2-Methylhippuric acid, m-Methylhippuric acid, Methyl n-acetylanthranilate, 4-Hydroxy-5-phenyltetrahydro-1,3-oxazin-2-one, 3-Carbamoyl-2-phenylpropionaldehyde, 4-Anilino-4-oxobutanoic acid	HMDB0013292, HMDB0000821, HMDB0000859, HMDB0011723, HMDB0013245, HMDB0032388, HMDB0060389, HMDB0060366, HMDB0060758	1	1	1	0.000171553	0.000126947	0.000494265	0.00043174	0.000409016	0.000731542	-0.987909	0.372635	Phenylacetylglycine	PM
C10H13NO4	M+H	C10H13NO4+H+	212.092	3-Methoxytyrosine, Methyldopa, 3-O-Methyl-a-methyldopa	HMDB0001434, HMDB0011754, HMDB0060747	1	1	1	8.4212e-05	7.27319e-05	0.000273177	0.000242981	0.000290807	0.000392788	-1.10717	0.478307	3-Methoxytyrosine	PM
C10H9N5O	M+H	C10H9N5O+H+	216.088	Kinetin	HMDB0012245	1	1	1	0.00022389	0.000167246	0.000106667	0.000119993	8.99001e-05	0.000181434	0.347201	0.231282	Kinetin	PM
C10H17NO4	M+H	C10H17NO4+H+	216.123	2-amino-8-oxo-9,10-epoxy-decanoic acid, Propenoylcarnitine	LMFA01060176, LMFA07070104	1	1	1	9.25696e-05	8.41055e-05	0.000163167	0.000208248	0.000215086	0.000189117	-0.849733	0.621879	Propenoylcarnitine	FA
C11H21NO3	M+H	C11H21NO3+H+	216.159	N-Nonanoylglycine	HMDB0013279	1	1	1	0.00014019	0.000138571	0.000163209	0.000190312	0.000144361	0.000152257	-0.13977	0.239574	N-Nonanoylglycine	PM
C13H16N2O	M+H	C13H16N2O+H+	217.134	Nb-Acetyl-Nb-methyltryptamine	HMDB0029837	1	1	1	1.76842e-05	1.52578e-05	6.56856e-05	8.27587e-05	9.83299e-05	0.000123707	-1.62778	0.641558	Nb-Acetyl-Nb-methyltryptamine	PM
C13H15NO2	M+H	C13H15NO2+H+	218.118	N-desisopropylpropranolol	HMDB0060961	1	1	1	6.78408e-05	7.10868e-05	0.000124398	8.59659e-05	0.000108335	0.000115533	-0.234646	0.206425	N-desisopropylpropranolol	PM
C10H19NO4	M+H	C10H19NO4+H+	218.139	Propionylcarnitine, O-propanoyl-carnitine	HMDB0000824, HMDB0062514	1	1	1	0.000154836	0.000222618	0.000853044	0.000167258	0.000189437	0.000385838	0.728714	0.181836	O-propanoyl-carnitine	FA
C9H18N2O4	M+H	C9H18N2O4+H+	219.134	Isoleucyl-Serine, Leucyl-Serine, Serylisoleucine, Serylleucine, Threoninyl-Valine, Valyl-Threonine	HMDB0028916, HMDB0028938, HMDB0029042, HMDB0029043, HMDB0029074, HMDB0029137	1	1	1	0.000484487	0.000521695	0.00127538	0.000443936	0.000139747	0.00028183	1.39839	0.371932	Isoleucyl-Serine	PM
C13H18N2O	M+H	C13H18N2O+H+	219.149	5-Methoxydimethyltryptamine, N-despropyl ropinirole	HMDB0002004, HMDB0060625	1	1	1	2.30917e-05	2.03754e-05	5.03916e-05	8.58742e-05	9.69828e-05	0.000111471	-1.64886	0.964306	5-Methoxydimethyltryptamine	PM
C11H14N2O3	M+H	C11H14N2O3+H+	223.108	Glycyl-Phenylalanine, Phenylalanyl-Glycine	HMDB0028848, HMDB0028995	1	1	1	7.89023e-05	7.00148e-05	0.000182678	0.000197624	0.000215106	0.000294338	-1.09243	0.621879	Phenylalanyl-Glycine	PM
C11H12O5	M+H	C11H12O5+H+	225.076	Elenolide, Sinapic acid, 3-(3-hydroxy-4,5-dimethoxyphenyl)prop-2-enoic acid, 3-(4,5-dihydroxy-2,3-dimethoxyphenyl)prop-2-enal, 3-(6-hydroxy-7-methoxy-2H-1,3-benzodioxol-5-yl)propanal, 3-(7-hydroxy-6-methoxy-2H-1,3-benzodioxol-5-yl)propanal, 6-(3-hydroxyprop-1-en-1-yl)-4-methoxy-2H-1,3-benzodioxol-5-ol, 6-(3-hydroxyprop-1-en-1-yl)-5-methoxy-2H-1,3-benzodioxol-4-ol, 3-(4-hydroxy-3,5-dimethoxyphenyl…	HMDB0030018, HMDB0032616, HMDB0141325, HMDB0128665, HMDB0128667, HMDB0128668, HMDB0128673, HMDB0128674, HMDB0127488, HMDB0128183, HMDB0140920, HMDB0142075, HMDB0142169, HMDB0142170, HMDB0142171, HMDB0142172, HMDB0142173, HMDB0142174	1	1	1	0.000217956	0.00020982	0.000244977	0.000122081	0.000134141	0.000108366	0.88381	1.09881	Elenolide, Sinapic acid	PM
C11H13NO3	M+NH4	C11H13NO3+NH4+	225.123	N-Acetyl-L-phenylalanine, 3-Phenylpropionylglycine, Phenylpropionylglycine, N-isopropylterephthalamic acid	HMDB0000512, HMDB0002042, HMDB0000860, HMDB0060608	1	1	1	0.000116968	9.06121e-05	0.000307855	0.000321242	0.000345974	0.000474242	-1.14702	0.573117	N-Acetyl-L-phenylalanine	PM
C11H19NO4	M+H	C11H19NO4+H+	230.139	Butenylcarnitine	LMFA07070053	1	1	1	0.000113223	0.000106086	0.00015507	0.000189912	0.000190615	0.000186042	-0.597752	0.621879	Butenylcarnitine	FA
C11H22N2O3	M+H	C11H22N2O3+H+	231.17	Isoleucyl-Valine, Leucyl-Valine, Valyl-Isoleucine, Valyl-Leucine	HMDB0028920, HMDB0028942, HMDB0029130, HMDB0029131	1	1	1	0.00018754	0.000234161	0.00020787	0.00031816	0.000273685	0.000204674	-0.33934	0.371932	Isoleucyl-Valine	PM
C11H21NO3	M+NH4	C11H21NO3+NH4+	233.186	N-Nonanoylglycine	HMDB0013279	1	1	1	8.6173e-05	9.23304e-05	0.000379372	0.000150597	9.5212e-05	0.000256068	0.152609	0.0431414	N-Nonanoylglycine	PM
C12H16N2O3	M+H	C12H16N2O3+H+	237.123	Alanyl-Phenylalanine, Phenylalanyl-Alanine, O-Desmethyl-lacosamide	HMDB0028694, HMDB0028988, HMDB0060855	1	1	1	9.05041e-05	7.42947e-05	0.00024938	0.00024418	0.000266549	0.000333879	-1.02803	0.487252	Alanyl-Phenylalanine	PM
C12H21NO4	M+H	C12H21NO4+H+	244.154	2-ethylacryloylcarnitine, Tiglylcarnitine	LMFA07070030, LMFA07070108	1	1	1	8.97562e-05	7.75722e-05	0.000109448	9.84424e-05	0.000100981	9.20852e-05	-0.0748203	0.117104	Tiglylcarnitine	FA
C12H24N2O3	M+H	C12H24N2O3+H+	245.186	Isoleucyl-Isoleucine, Isoleucyl-Leucine, Leucyl-Isoleucine, Leucyl-Leucine	HMDB0028910, HMDB0028911, HMDB0028932, HMDB0028933	1	1	1	0.000170494	0.000147503	0.00028603	0.000352198	0.000202076	0.000261339	-0.433272	0.305273	Isoleucyl-Leucine	PM
C5H12O7P2	M+H	C5H12O7P2+H+	247.013	Dimethylallylpyrophosphate, Isopentenyl pyrophosphate	HMDB0001120, HMDB0001347	1	1	1	2.94725e-05	2.32516e-05	2.57513e-05	8.23609e-06	9.50648e-06	1.71684e-05	1.16856	0.830146	Dimethylallylpyrophosphate	PR
C11H21NO5	M+H	C11H21NO5+H+	248.149	3-hydroxybutyrylcarnitine, Hydroxybutyrylcarnitine	LMFA07070037, LMFA07070071	1	1	1	7.95139e-05	7.58612e-05	0.000111693	0.000144915	0.000130832	0.000122707	-0.577208	0.641558	Hydroxybutyrylcarnitine	FA
C12H22O4	M+NH4	C12H22O4+NH4+	248.186	Bis(1-methylethyl) hexanedioate, Dodecanedioic acid, Dipropyl hexanedioate	LMFA07010790, LMFA01170009, LMFA07010841	1	1	1	0.00014951	0.000145209	0.000177034	0.000281351	0.0002398	0.000227833	-0.666904	0.857902	Dodecanedioic acid	FA
C14H22N2O2	M+H	C14H22N2O2+H+	251.175	3-Hydroxylidocaine	HMDB0060655	1	1	1	1.95077e-05	1.52443e-05	5.39664e-05	5.80179e-05	5.56447e-05	0.000133177	-1.47627	0.381521	3-Hydroxylidocaine	PM
C11H17NO6	M+H	C11H17NO6+H+	260.113	Fumarycarnitine, Osmaronin	HMDB0013134, HMDB0032769	1	1	1	6.24675e-05	4.59858e-05	7.34152e-05	6.50325e-05	7.69301e-05	8.10259e-05	-0.294074	0.371932	Fumarycarnitine	FA
C6H12O9S	M+H	C6H12O9S+H+	261.027	{[2,3,4-trihydroxy-5-(hydroxymethyl)oxolan-2-yl]methoxy}sulfonic acid, {[3,4,5-trihydroxy-5-(hydroxymethyl)oxolan-2-yl]methoxy}sulfonic acid, [4,5-dihydroxy-2,5-bis(hydroxymethyl)oxolan-3-yl]oxidanesulfonic acid, [2,4-dihydroxy-2,5-bis(hydroxymethyl)oxolan-3-yl]oxidanesulfonic acid	HMDB0125613, HMDB0125614, HMDB0125615, HMDB0125616	1	1	1	2.25902e-05	3.3724e-05	5.67086e-05	2.90891e-06	1.92356e-05	6.56094e-06	1.97722	0.531369	D-Galactose 6-sulfate	PM
C12H20O6	M+H	C12H20O6+H+	261.133	Glycerol tripropanoate	HMDB0032857	1	1	1	0.000474838	0.000524937	0.000819489	0.000120212	0.000140943	5.15536e-05	2.54046	0.641558	Glycerol tripropanoate	PM
C14H20N2O3	M+H	C14H20N2O3+H+	265.155	Phenylalanyl-Valine, Valyl-Phenylalanine, (2E)-N-(4-aminobutyl)-3-(4-hydroxy-3-methoxyphenyl)prop-2-enimidic acid, N-(4-aminobutyl)-3-(4-hydroxy-3-methoxyphenyl)prop-2-enimidic acid	HMDB0029008, HMDB0029134, HMDB0139553, HMDB0139638	1	1	1	3.83875e-05	2.94802e-05	9.57327e-05	0.000112715	0.000123265	0.000178345	-1.34059	0.641558	Phenylalanyl-Valine	PM
C18H32O	M+H	C18H32O+H+	265.253	9Z,12Z-Octadecadienal, 11E,14E-Octadecadienal, 2E,13Z-Octadecadienal, 3Z,13Z-Octadecadienal, 6S,7R-Epoxy-3Z,9Z-octadecadiene, 3,4-Epoxy-6,9-octadecadiene, 5-(1-hydroxypropan-2-yl)isolongifolane, 9,12,15-Octadecatrien-1-ol, 9,12-octadecadienal, 3E,13Z-Octadecadienal, 11Z,13Z-Octadecadienal, 13Z,15Z-Octadecadienal, 9S,10R-Epoxy-6Z-octadecene	LMFA06000242, LMFA06000233, LMFA06000234, LMFA06000241, LMFA12000287, LMFA12000288, LMPR0103500010, LMFA05000216, LMFA06000101, LMFA06000235, LMFA06000239, LMFA06000240, LMFA12000284	1	1	1	0.00085912	0.000529764	0.000432016	0.000700629	0.00063051	0.000447711	0.0337079	0.0218047	(z)-9,17-octadecadienal	PM
C12H14O7	M+H	C12H14O7+H+	271.081	Phenylglucuronide, Phenol glucuronide, 3,4,5-trihydroxy-6-phenoxyoxane-2-carboxylic acid	HMDB0059806, HMDB0060014, HMDB0135168	1	1	1	0.000587832	0.000552104	0.000771397	0.000294312	0.000324291	9.85719e-05	1.41418	0.830146	Phenylglucuronide	PM
C13H25NO5	M+H	C13H25NO5+H+	276.181	Hydroxyhexanoycarnitine	HMDB0013131	1	1	1	3.77629e-05	3.78663e-05	6.32162e-05	9.64345e-05	9.94831e-05	9.88837e-05	-1.08626	0.721681	Hydroxyhexanoycarnitine	FA
C15H22N2O3	M+H	C15H22N2O3+H+	279.17	Leucyl-phenylalanine, Isoleucyl-Phenylalanine, Phenylalanyl-Isoleucine, keratan sulfate I	HMDB0013243, HMDB0028914, HMDB0028998, HMDB0062483	1	1	1	3.34616e-05	2.88209e-05	0.000104289	9.76103e-05	9.58607e-05	0.000159395	-1.08298	0.449573	Leucyl-phenylalanine	PM
C18H33NO	M+H	C18H33NO+H+	280.263	Linoleamide	HMDB0062656	1	1	1	1.62671e-05	1.27462e-05	3.91837e-05	3.81296e-05	7.68737e-05	6.79598e-05	-1.42377	0.621879	Linoleamide	FA
C20H30O	M+H	C20H30O+H+	287.237	Vitamin A, 11-cis-Retinol, 9-cis-Retinol, 13-cis Retinol, (x)-p-Menth-1-en-4-yl 5-isopropyl-2-methylphenyl ether, Abietinal, ent-16-Kauren-19-al, ent-19-Trachylobanal, 8,13-Abietadien-18-al	HMDB0000305, HMDB0006216, HMDB0006217, HMDB0006221, HMDB0030403, HMDB0034735, HMDB0036728, HMDB0036841, HMDB0038709	1	1	1	0.000922376	0.000777993	0.000420661	0.000780813	0.000658749	0.000339225	0.253871	0.149559	Vitamin A	PR
C19H32O	M+NH4	C19H32O+NH4+	294.279	5a-Androstan-3b-ol, 3-tridecylphenol, 5-(1-hydroxybutan-2-yl)isolongifol-5-ene, 5-(3-hydroxybutan-2-yl)isolongifol-5-ene, 5-(1-methoxypropan-2-yl)isolongifol-5-ene, 5-(1-hydroxybutan-2-yl)isolongifol-4-ene	LMST02020095, LMPK15010003, LMPR0103500007, LMPR0103500009, LMPR0103500016, LMPR0103500006	1	1	1	5.45326e-05	4.33752e-05	0.000128515	0.00011548	0.000122376	0.000147334	-0.766557	0.371932	5a-Androstan-3b-ol	ST
C9H18NO8P	M+H	C9H18NO8P+H+	300.084	D-4'-Phosphopantothenate	HMDB0001016	1	1	1	2.96786e-05	2.26612e-05	1.66442e-05	2.98532e-05	5.97268e-05	5.69371e-05	-1.08674	0.507958	D-4'-Phosphopantothenate	PM
C20H30O2	M+H	C20H30O2+H+	303.232	Eicosapentaenoic acid, Retinyl ester, 8,15-Isopimaradien-18-oic acid, Siderone, Yucalexin B14, Yucalexin A16, 8(17),12-Labdadiene-15,16-dial, Isopimaric acid, Cascarillone, 8,13-Abietadien-18-oic acid, (ent-15beta,16beta)-15,16-Epoxy-3-kauranone, ent-8(17),13(16),14-Labdatrien-18-oic acid	HMDB0001999, HMDB0003598, HMDB0035692, HMDB0036703, HMDB0036709, HMDB0036775, HMDB0036805, HMDB0036811, HMDB0036826, HMDB0038172, HMDB0038687, HMDB0039486	1	1	1	0.000376313	0.000250466	0.000120958	0.000206809	0.000125084	5.58746e-05	0.947337	0.357429	Eicosapentaenoic acid	FA
C15H29NO5	M+H	C15H29NO5+H+	304.212	3-hydroxyoctanoyl carnitine	HMDB0061634	1	1	1	3.33756e-05	2.67856e-05	8.0685e-05	7.4081e-05	7.84168e-05	0.00010655	-0.879095	0.438603	3-hydroxyoctanoyl carnitine	FA
C20H32O2	M+H	C20H32O2+H+	305.248	Arachidonic acid, Cis-8,11,14,17-Eicosatetraenoic acid, Mesterolone, Sideridiol, ent-17-Hydroxy-16beta-kauran-19-al, Yucalexin P21, Copalic acid, Junicedral, 7,13-Eperudien-15-oic acid, Oryzalexin S, Oryzalexin E	HMDB0001043, HMDB0002177, HMDB0006036, HMDB0036702, HMDB0036721, HMDB0036754, HMDB0036829, HMDB0036830, HMDB0037824, HMDB0039687, HMDB0039702	1	1	1	0.00563679	0.00455952	0.00203578	0.00418192	0.00331076	0.00132072	0.472899	0.231327	Arachidonic acid	FA
C20H35NO	M+H	C20H35NO+H+	306.279	Clavepictine B	LMSP01080053	1	1	1	5.35603e-06	6.88572e-06	1.78351e-05	1.94687e-05	2.80497e-05	2.5506e-05	-1.27972	0.641558	Clavepictine B	SP
C20H34O2	M+H	C20H34O2+H+	307.263	8,11,14-Eicosatrienoic acid, 5,8,11-Eicosatrienoic acid, Sciadonic acid, Sagittariol, 11,14,17-Eicosatrienoic acid	HMDB0002925, HMDB0010378, HMDB0031058, HMDB0036835, HMDB0060039	1	1	1	0.000338642	0.000261805	0.000151524	0.000163387	0.000154772	0.000114549	0.797283	0.371932	11,14,17-eicosatrienoic acid	FA
C20H34O	M+NH4	C20H34O+NH4+	308.295	Presphaerol, (-)-Dilophol, 8-[3]-ladderane-1-octanol, cis-9,10-Epoxy-1,3Z,6Z-eicosatriene, 5-(1-methoxybutan-2-yl)isolongifol-5-ene, Geranylgeraniol, aphidicolan-16beta-ol, Verrucosan-2b-ol, (+)-Verticillol, (+)-Tormesol, (Z,Z,Z)-geranylgeraniol, tuberculosinol	LMPR0104220002, LMPR0104450002, LMFA05000066, LMFA12000308, LMPR0103500014, LMPR0104010009, LMPR0104160002, LMPR0104280002, LMPR0104380001, LMPR0104530001, LMPR0104010018, LMPR0104030005	1	1	1	0.000135502	0.000113531	0.000402563	0.000456355	0.000605632	0.000714444	-1.44693	0.641558	Geranylgeraniol	PR
C19H37NO2	M+H	C19H37NO2+H+	312.29	(4E,8E,9Me-d19:2)sphingosine	LMSP01080012	1	1	1	3.61339e-05	2.60418e-05	5.32668e-05	6.97701e-05	6.20738e-05	6.79353e-05	-0.791231	0.621879	(4E,8E,9Me-d19:2)sphingosine	SP
C17H31NO4	M+H	C17H31NO4+H+	314.233	9-Decenoylcarnitine	HMDB0013205	1	1	1	3.27683e-05	3.79604e-05	4.77088e-05	6.35361e-05	7.97697e-05	6.70401e-05	-0.828638	0.869995	9-Decenoylcarnitine	FA
C10H20O7P2	M+H	C10H20O7P2+H+	315.076	Geranyl-PP	HMDB0001285	1	1	1	5.59376e-05	5.3602e-05	0.000134803	0.000142959	0.000171536	0.000162591	-0.965343	0.531369	Geranyl-PP	PR
C16H31NO5	M+H	C16H31NO5+H+	318.227	3-hydroxynonanoyl carnitine	HMDB0061635	1	1	1	1.52053e-05	7.41663e-06	1.48204e-05	3.58807e-05	2.92214e-05	2.89739e-05	-1.32915	0.964306	3-hydroxynonanoyl carnitine	FA
C20H33NO2	M+H	C20H33NO2+H+	320.258	N-hydroxy arachidonoyl amine, Anandamide (18:4,n-3)	LMFA08020029, LMFA08040006	1	1	1	3.76207e-05	8.82081e-06	3.21111e-06	8.85917e-06	7.16759e-06	6.88138e-07	1.57073	0.24373	N-hydroxy arachidonoyl amine	FA
C11H19N3O6S	M+H	C11H19N3O6S+H+	322.107	L-L-Homoglutathione	HMDB0029395	1	1	1	0.00187702	0.00305965	0.00166569	0.000885265	0.00114814	0.000696095	1.27434	0.531369	L-L-Homoglutathione	PM
C20H35NO2	M+H	C20H35NO2+H+	322.274	Alpha-Linolenoyl ethanolamide	HMDB0013624	1	1	1	0.00121227	0.000678364	0.000403641	0.00230922	0.00139572	0.000578578	-0.900758	0.301428	Alpha-Linolenoyl ethanolamide	FA
C20H37NO2	M+H	C20H37NO2+H+	324.29	Linoleoyl ethanolamide	HMDB0012252	1	1	1	8.16747e-05	5.38343e-05	0.000186384	8.42316e-05	8.59855e-05	0.000145217	0.0292463	0.015494	Linoleoyl ethanolamide	FA
C20H39NO2	M+H	C20H39NO2+H+	326.305	N-Oleoylethanolamine	HMDB0002088	1	1	1	3.78619e-05	3.04364e-05	8.2629e-05	6.57143e-05	7.01115e-05	0.000103513	-0.665198	0.371932	N-Oleoylethanolamine	FA
C22H32O2	M+H	C22H32O2+H+	329.248	Docosahexaenoic acid, Neogrifolin, Grifolin, Retinol acetate	HMDB0002183, HMDB0030053, HMDB0030446, HMDB0035185	1	1	1	0.00237988	0.00166441	0.000711538	0.00213841	0.00140001	0.000523705	0.227462	0.0861425	Docosahexaenoic acid	FA
C18H35NO4	M+H	C18H35NO4+H+	330.264	4,8 dimethylnonanoyl carnitine, Undecanoylcarnitine	LMFA07070046, LMFA07070110	1	1	1	4.58867e-05	4.0222e-05	7.37686e-05	0.000130505	0.000138404	0.000110803	-1.24794	0.964306	Undecanoylcarnitine	FA
C22H34O2	M+H	C22H34O2+H+	331.263	Docosapentaenoic acid (22n-6), Docosapentaenoic acid, Ethyl abietate, ent-16-Kauren-19-ol acetate, 4,8,12,15,19-Docosapentaenoic acid, Ethyl icosapentate	HMDB0001976, HMDB0006528, HMDB0032257, HMDB0035024, HMDB0039133, HMDB0039530	1	1	1	0.000222233	0.000150538	3.73404e-05	5.91983e-05	4.42672e-05	1.73217e-05	1.76355	0.371932	Docosapentaenoic acid	FA
C17H33NO5	M+H	C17H33NO5+H+	332.243	3-hydroxydecanoyl carnitine	HMDB0061636	1	1	1	6.06222e-06	7.7681e-06	1.07949e-05	2.31302e-05	2.68819e-05	2.75332e-05	-1.65491	1.34753	3-hydroxydecanoyl carnitine	FA
C18H34O4	M+NH4	C18H34O4+NH4+	332.28	(9Z)-(7S,8S)-Dihydroxyoctadecenoic acid, 10-Hydroxy-9-ketooctadecanoic acid, 3-Acetoxy-palmitic acid, Octadecanedioic acid, 9-Hydroxy-10-ketooctadecanoic acid, 18-hydroxy-9R,10S-epoxy-stearic acid, 6-HpOME(7E), 7S,10S-diHOME, 8R,11S-DiHOME, 11R-HpOME, 13R-HpOME(11E), 13S-HpOME(11E), 12R-HpOME(13E), 14R-HpOME(12E), 12S-HpOME(13Z), 10R-HpOME(11Z), 8-HpOME(6E), 9-HpOME(7E), 11-HpOME(9Z), 12-HpOME(10…	LMFA01050451, LMFA01050538, LMFA01050550, LMFA01170029, LMFA01060213, LMFA02000003, LMFA02000097, LMFA02000060, LMFA02000063, LMFA02000067, LMFA02000068, LMFA02000069, LMFA02000070, LMFA02000072, LMFA02000075, LMFA02000076, LMFA02000079, LMFA02000080, LMFA02000081, LMFA02000082, LMFA02000161, LMFA02000162, LMFA02000116, LMFA02000117, LMFA02000119, LMFA02000163, LMFA02000164, LMFA02000225, LMFA020…	1	1	1	2.78379e-05	2.27673e-05	2.46378e-05	6.76643e-05	6.35114e-05	5.38735e-05	-1.29828	0.964306	Octadecanedioic acid	FA
C22H37NO	M+H	C22H37NO+H+	332.295	N-ethyl arachidonoyl amine, N,N-dimethyl arachidonoyl amine	LMFA08020006, LMFA08020023	1	1	1	2.02697e-06	2.75488e-06	1.26795e-05	6.351e-06	1.6076e-05	1.0728e-05	-0.925059	0.305273	N,N-dimethyl arachidonoyl amine	FA
C22H36O2	M+H	C22H36O2+H+	333.279	5Z,13Z,16Z,19Z-Docosatetraenoic acid, 8,12,16,19-docosatetraenoic acid, 22:4(7Z,13Z,16Z,19Z), 3,7,11,15-Tetramethyl-2E,6E,10E,14-hexadecatetraenyl acetate, 10-[3]-ladderane-decanoic acid, Adrenic acid, 22:4(4Z,7Z,10Z,13E), 4,7,10,13-docosatetraenoic acid, Adrenic Acid	LMFA04000087, LMFA01030179, LMFA04000063, LMFA07010351, LMFA01140012, LMFA04000050, LMFA04000066, LMFA01030177, LMFA01030178	1	1	1	0.000490307	0.000389054	0.000110099	0.000370714	0.000345179	9.72842e-05	0.283073	0.0981348	Adrenic acid	FA
C21H32O2	M+NH4	C21H32O2+NH4+	334.274	Calusterone, Bolasterone, 5beta-pregnane-3,20-dione, Pregnenolone, 6Z,9Z,12Z,15Z,18Z-heneicosapentaenoic acid, 20-hydroxypregn-4-en-3-one, (20R)-20-hydroxypregn-4-en-3-one, (20S)-20-hydroxypregn-4-en-3-one, 5alpha-pregnane-3,20-dione, Ethyltestosterone	LMST02020010, LMST02020017, LMST02030146, LMST02030088, LMFA01030823, LMST02030152, LMST02030153, LMST02030169, LMST02030170, LMST02030201	1	1	1	6.23367e-05	4.07039e-05	3.18952e-05	0.000137277	6.1586e-05	2.39317e-05	-0.723443	0.220604	Pregnenolone	ST
C11H15N2O8P	M+H	C11H15N2O8P+H+	335.064	Nicotinamide ribotide	HMDB0000229	1	1	1	1.80435e-05	3.77191e-05	8.08511e-05	4.61129e-05	9.57663e-05	5.44455e-05	-0.523139	0.231282	Nicotinamide ribotide, NMN	PM
C12H22O11	M+H	C12H22O11+H+	343.123	D-Maltose, Alpha-Lactose, Trehalose, Isomaltose, Galactinol, 3-b-Galactopyranosyl glucose, Epimelibiose, Kojibiose, Turanose, Neotrehalose, Inulobiose, Galabiose, Maltulose, Mannobiose, 2-{[3,4-dihydroxy-2,5-bis(hydroxymethyl)oxolan-2-yl]oxy}-6-(hydroxymethyl)oxane-3,4,5-triol, 6-({[3,4,5-trihydroxy-6-(hydroxymethyl)oxan-2-yl]oxy}methyl)oxane-2,3,4,5-tetrol	HMDB0000163, HMDB0000186, HMDB0000975, HMDB0002923, HMDB0005826, HMDB0006603, HMDB0006792, HMDB0011742, HMDB0011740, HMDB0029880, HMDB0029898, HMDB0029902, HMDB0029919, HMDB0029933, HMDB0125600, HMDB0133305	1	1	1	0.000386324	0.000338922	2.45454e-05	4.60281e-05	2.00414e-05	3.4484e-06	3.43103	0.371932	D-Maltose/Trehalose	PM
C22H35NO2	M+H	C22H35NO2+H+	346.274	Eicosapentaenoyl Ethanolamide	HMDB0013649	1	1	1	0.00114466	0.000541876	0.000280288	0.00239056	0.00117559	0.000389246	-1.00795	0.262561	Eicosapentaenoyl Ethanolamide	PM
C18H18O7	M+H	C18H18O7+H+	347.113	Hamilcone, 5,2'-Dihydroxy-6,7,6'-trimethoxyflavanone, 5,2'-Dihydroxy-7,8,6'-trimethoxyflavanone, 2,8-Dihydroxy-3,9,10-trimethoxypterocarpan, Amorphaquinone, 2',6'-Dihydroxy-4,3'-dimethoxy-4',5'-methylenedioxydihydrochalcone, 5,2'-Dihydroxy-7,4',5'-trimethoxyflavanone, 5,3'-Dihydroxy-6,7,4'-trimethoxyflavanone, Agestricin D, 5,3'-Dihydroxy-7,8,4'-trimethoxyflavanone, 5,6-Dihydroxy-7,8,4'-trimethox…	LMPK12120349, LMPK12140601, LMPK12140645, LMPK12070070, LMPK12080054, LMPK12120565, LMPK12140536, LMPK12140626, LMPK12140627, LMPK12140673, LMPK12140683, LMPK12140684	1	1	1	4.07434e-05	1.7429e-05	6.22968e-05	4.46684e-05	1.03061e-05	2.91295e-05	0.518419	0.206425	C18 Ceramide	SP
C22H37NO2	M+H	C22H37NO2+H+	348.29	Anandamide-d4 (20:4,n-6), Anandamide (20:4,n-6), Arachidonoyl-EA(d8), Virodhamine	LMFA08040056, LMFA08040001, LMFA08040044, LMFA00000014	1	1	1	8.88953e-05	3.76819e-05	2.79259e-05	8.1539e-05	5.89705e-05	3.78241e-05	-0.206943	0.0861425	Anandamide (20:4,n-6)	FA
C22H39NO2	M+H	C22H39NO2+H+	350.305	Anandamide (20:3,n-3), Dihomo-gamma-linolenoyl-EA, Mead Acid-EA	LMFA08040005, LMFA08040011, LMFA08040037	1	1	1	0.000178372	0.000105189	7.54205e-05	0.000315535	0.000239	0.000118758	-0.907325	0.371932	Anandamide (20:3,n-3)	FA
C18H24O5S	M+H	C18H24O5S+H+	353.142	Estradiol-17beta 3-sulfate	LMST05020005	1	1	1	4.98684e-05	3.4591e-05	2.07648e-06	6.55551e-05	3.30188e-05	9.43262e-06	-0.319748	0.0844523	Estradiol-17beta 3-sulfate	ST
C21H40O4	M+H	C21H40O4+H+	357.3	MG(0:0/18:1(11Z)/0:0), MG(0:0/18:1(9Z)/0:0), MG(18:1(11Z)/0:0/0:0), MG(18:1(9Z)/0:0/0:0), Stearoyllactic acid, 3-(2-Heptenyloxy)-2-hydroxypropyl undecanoate	HMDB0011536, HMDB0011537, HMDB0011566, HMDB0011567, HMDB0033372, HMDB0034031	1	1	1	0.000245844	0.000213864	0.00030128	0.000422959	0.000469721	0.000370112	-0.730674	0.857902	MG(18:1)	GL
C20H39NO4	M+H	C20H39NO4+H+	358.295	N-palmitoyl threonine	LMFA08020107	1	1	1	8.71494e-06	4.03523e-06	3.68783e-06	2.0026e-05	1.80642e-05	1.57008e-05	-1.71033	0.964306	N-palmitoyl threonine	FA
C24H38O2	M+H	C24H38O2+H+	359.294	Tetracosapentaenoic acid (24:5n-6), Tetracosapentaenoic acid (24:5n-3)	HMDB0006322, HMDB0006323	1	1	1	1.13043e-05	1.05856e-05	2.21134e-05	7.87807e-06	2.26134e-05	2.16355e-05	-0.24442	0.105341	Tetracosapentaenoic acid (24:5n-6)	PM
C23H34O2	M+NH4	C23H34O2+NH4+	360.29	TrHA, 6Z,8E-tricosdien-4,19-diynoic acid	LMFA01030853, LMFA01031128	1	1	1	9.8077e-05	5.76548e-05	6.27091e-05	0.000213739	0.000120319	5.60872e-05	-0.836765	0.290537	TrHA	FA
C18H32O6	M+NH4	C18H32O6+NH4+	362.254	delta10-13-PhytoF, delta14-10-PhytoF, delta10-12-PhytoF, delta14-9-PhytoF	LMFA02040001, LMFA02040004, LMFA02040002, LMFA02040003	1	1	1	3.0873e-05	2.59736e-05	3.42335e-05	6.04518e-05	5.89992e-05	4.80754e-05	-0.879182	0.889068	Glycerol trivalerate	PM
C21H41NO4	M+H	C21H41NO4+H+	372.311	Tetradecanoylcarnitine	HMDB0005066	1	1	1	6.12219e-06	4.40644e-06	4.88856e-06	2.1864e-05	1.65526e-05	1.26177e-05	-1.72693	0.641558	Tetradecanoylcarnitine	FA
C24H41NO	M+NH4	C24H41NO+NH4+	377.353	N-butyl arachidonoyl amine, N-tert-butyl arachidonoyl amine, (-)N-(1R-methyl-propyl) arachidonoyl amine, (+)N-(1S-methyl-propyl) arachidonoyl amine, N,N-diethyl arachidonoyl amine, N-propyl alpha-methyl arachidonoyl amine, N-isopropyl alpha-methylarachidonoyl amine	LMFA08020011, LMFA08020012, LMFA08020016, LMFA08020017, LMFA08020024, LMFA08020033, LMFA08020035	1	1	1	1.72862e-05	8.79452e-06	3.0602e-05	5.19993e-05	9.18318e-05	5.54278e-05	-1.81366	0.641558	N-butyl arachidonoyl amine	FA
C23H38O4	M+H	C23H38O4+H+	379.284	2-Arachidonylglycerol, MG(0:0/20:4(8Z,11Z,14Z,17Z)/0:0), MG(20:4(5Z,8Z,11Z,14Z)/0:0/0:0), MG(20:4(8Z,11Z,14Z,17Z)/0:0/0:0), 1-Acetoxy-2-hydroxy-5,12,15-heneicosatrien-4-one, Persenone A	HMDB0004666, HMDB0011549, HMDB0011578, HMDB0011579, HMDB0035273, HMDB0036568	1	1	1	0.000125734	0.000132855	0.000174663	0.000343334	0.000295737	0.000153893	-0.872046	0.381521	2-Arachidonylglycerol	GL
C23H41NO4	M+H	C23H41NO4+H+	396.311	9,12-Hexadecadienoylcarnitine	HMDB0013334	1	1	1	2.07006e-05	1.69876e-05	1.97485e-05	6.88116e-05	4.35064e-05	2.11569e-05	-1.21652	0.371932	9,12-Hexadecadienoylcarnitine	FA
C25H38O4	M+H	C25H38O4+H+	403.284	7b-Hydroxy-3-oxo-5b-cholanoic acid, MG(0:0/22:6(4Z,7Z,10Z,13Z,16Z,19Z)/0:0), MG(22:6(4Z,7Z,10Z,13Z,16Z,19Z)/0:0/0:0)	HMDB0000541, HMDB0011557, HMDB0011587	1	1	1	7.39263e-05	4.54374e-05	7.01702e-05	0.000123195	0.000106101	5.8458e-05	-0.602378	0.371932	MG(22:6)	GL
C24H38O5	M+H	C24H38O5+H+	407.279	7-Ketodeoxycholic acid, 3,7-Dihydroxy-12-oxocholanoic acid, Annocherin A, (6b,7b,13R)-6,7-Diacetoxy-8,14-labdadiene-13-ol, 7alpha,12alpha-dihydroxy-3-oxo-5beta-cholan-24-oic Acid	HMDB0000391, HMDB0000400, HMDB0033399, HMDB0035288, HMDB0062680	1	1	1	6.24323e-05	4.4078e-05	1.47279e-05	4.41754e-05	2.315e-05	2.1642e-06	0.802977	0.245311	3-Oxocholic acid	ST
C25H38O4	M+NH4	C25H38O4+NH4+	420.311	MG(0:0/22:6(4Z,7Z,10Z,13Z,16Z,19Z)/0:0), 1alpha-hydroxy-26,27-dinorvitamin D3 25-carboxylic acid / 1alpha-hydroxy-26,27-dinorcholecalciferol 25-carboxylic acid, (+)-Scalarin, 16-O-deacetyl-16-epi-scalarolbutenolide	LMGL01010027, LMST03020025, LMPR0105060001, LMPR0105060005	1	1	1	2.9876e-05	1.43734e-05	2.25621e-05	7.55664e-05	4.90759e-05	1.36151e-05	-1.04919	0.305273	MG(22:6)	GL
C23H43NO6	M+H	C23H43NO6+H+	430.316	Hexadecanedioic acid mono-L-carnitine ester	HMDB0000712	1	1	1	5.30142e-06	4.04291e-06	2.3607e-06	1.77575e-05	1.79524e-05	1.57442e-05	-2.13616	1.34753	Hexadecanedioic acid mono-L-carnitine ester	FA
C23H43NO3S	M+NH4	C23H43NO3S+NH4+	431.33	N-oleoyl methionine	LMFA08020110	1	1	1	4.94968e-05	2.58629e-05	4.96961e-05	0.000232285	0.000175459	0.000153496	-2.16605	0.830146	N-oleoyl methionine	FA
C29H48O4	M+NH4	C29H48O4+NH4+	478.389	13'-Carboxy-alpha-tocopherol, (3beta,5alpha,6beta,9alpha,22E,24R)-23-Methylergosta-7,22-diene-3,5,6,9-tetrol	HMDB0012555, HMDB0033634	1	1	1	5.9188e-06	3.3845e-06	8.2268e-06	3.01594e-05	2.79783e-05	2.86792e-05	-2.30814	1.34753	13'-Carboxy-alpha-tocopherol	PM
C34H62O2	M+NH4	C34H62O2+NH4+	520.509	Linolenyl palmitate, Palmitoleyl linoleate, Palmityl linolenate, Linoleyl palmitatoleate	LMFA07010122, LMFA07010124, LMFA07010125, LMFA07010123	1	1	1	6.49967e-05	3.7817e-05	3.14329e-05	2.742e-06	2.58177e-06	2.14642e-06	4.1676	0.621879	Linolenyl palmitate	FA
C26H48NO7P	M+NH4	C26H48NO7P+NH4+	535.351	PC(18:3(9Z,12Z,15Z)/0:0), PC(18:3(6Z,9Z,12Z)/0:0)	LMGP01050038, LMGP01050128	1	1	1	6.92517e-05	9.91577e-05	3.05965e-05	9.11288e-05	0.000105869	3.70593e-05	-0.234047	0.0981348	PC(18:3)	GP
C36H64O2	M+NH4	C36H64O2+NH4+	546.524	Linolenyl oleate, Linoleyl linoleate, 36:4(21Z,24Z,27Z,30Z), Oleyl linolenate	LMFA07010145, LMFA07010146, LMFA01030829, LMFA07010147	1	1	1	6.13601e-06	1.23709e-06	3.58248e-06	1.80964e-05	3.44819e-06	1.59076e-05	-1.77339	0.371932	Linoleyl linoleate	FA
C36H66O2	M+NH4	C36H66O2+NH4+	548.54	Oleyl linoleate, Stearyl linolenate, Linolenyl stearate, Linoleyl oleate	LMFA07010150, LMFA07010151, LMFA07010148, LMFA07010149	1	1	1	0.000131812	7.46839e-05	0.000104073	0.000411141	0.000255468	0.000210827	-1.49838	0.546656	Oleyl linoleate	FA
C28H52NO7P	M+NH4	C28H52NO7P+NH4+	563.382	LysoPC(20:3(5Z,8Z,11Z)), LysoPC(20:3(8Z,11Z,14Z))	HMDB0010393, HMDB0010394	1	1	1	0.00187209	0.00164724	0.0011005	0.00224741	0.00155943	0.000909408	-0.0297974	0.0176798	PC(20:3)	GP
C30H54NO7P	M+NH4	C30H54NO7P+NH4+	589.398	PC(22:4(7Z,10Z,13Z,16Z)/0:0)	LMGP01050124	1	1	1	0.000236478	0.000167981	0.000115882	0.000371338	0.000191455	0.000108598	-0.367696	0.149559	PC(22:4)	GP
C39H74O5	M+NH4	C39H74O5+NH4+	640.587	DG(16:1(9Z)/20:0/0:0)[iso2], DG(17:1(9Z)/19:0/0:0)[iso2], DG(15:1(9Z)/21:0/0:0)[iso2], DG(19:1(9Z)/17:0/0:0)[iso2], DG(18:0/18:1(9Z)/0:0)[iso2], DG(16:0/20:1(11Z)/0:0)[iso2], DG(14:0/22:1(11Z)/0:0)[iso2], DG(14:1(9Z)/22:0/0:0)[iso2]	LMGL02010047, LMGL02010052, LMGL02010466, LMGL02010524, LMGL02010043, LMGL02010048, LMGL02010396, LMGL02010419	1	1	1	9.12526e-06	5.64706e-06	2.72545e-05	1.57914e-05	1.66685e-05	1.57777e-05	-0.198848	0.0770023	DG(36:1)	GL
C40H76O5	M+NH4	C40H76O5+NH4+	654.603	DG(17:1(9Z)/20:0/0:0)[iso2], DG(17:0/20:1(11Z)/0:0)[iso2], DG(18:1(9Z)/19:0/0:0)[iso2], DG(16:1(9Z)/21:0/0:0)[iso2], DG(15:1(9Z)/22:0/0:0)[iso2], DG(19:1(9Z)/18:0/0:0)[iso2], DG(15:0/22:1(11Z)/0:0)[iso2]	LMGL02010059, LMGL02010060, LMGL02010072, LMGL02010095, LMGL02010467, LMGL02010527, LMGL02010444	1	1	1	3.3693e-06	2.3807e-06	1.40941e-05	1.89956e-05	8.66906e-06	6.19666e-06	-0.770926	0.233758	DG(37:1)	GL
C42H80O5	M+NH4	C42H80O5+NH4+	682.634	DG(17:1(9Z)/22:0/0:0)[iso2], DG(17:0/22:1(13Z)/0:0)[iso2], DG(18:1(9Z)/21:0/0:0)[iso2], DG(19:1(9Z)/20:0/0:0)[iso2], DG(19:0/20:1(11Z)/0:0)[iso2]	LMGL02010124, LMGL02010125, LMGL02010144, LMGL02010532, LMGL02010118	1	1	1	6.71211e-06	2.32345e-06	1.85738e-05	1.6292e-05	1.26745e-05	7.44808e-06	-0.399358	0.131037	DG(39:1)	GL
C43H72O5	M+NH4	C43H72O5+NH4+	686.572	DG(20:3(8Z,11Z,14Z)/20:3(8Z,11Z,14Z)/0:0), DG(20:1(11Z)/20:5(5Z,8Z,11Z,14Z,17Z)/0:0)[iso2], DG(18:2(9Z,12Z)/22:4(7Z,10Z,13Z,16Z)/0:0)[iso2], DG(18:0/22:6(4Z,7Z,10Z,13Z,16Z,19Z)/0:0)[iso2], DG(20:2(11Z,14Z)/20:4(5Z,8Z,11Z,14Z)/0:0)[iso2], DG(18:3(9Z,12Z,15Z)/22:3(10Z,13Z,16Z)/0:0)[iso2], DG(18:1(9Z)/22:5(7Z,10Z,13Z,16Z,19Z)/0:0)[iso2], DG(18:3(6Z,9Z,12Z)/22:3(10Z,13Z,16Z)/0:0)[iso2], DG(18:4(6Z,9Z…	LMGL02010186, LMGL02010188, LMGL02010214, LMGL02010216, LMGL02010187, LMGL02010202, LMGL02010215, LMGL02010494, LMGL02010517	1	1	1	8.97091e-06	1.04988e-05	1.15653e-05	5.18416e-05	2.81914e-05	6.79248e-06	-1.48422	0.323181	DG(40:6)	GL
C37H74NO8P	M+H	C37H74NO8P+H+	692.522	PC(14:0/15:0), PC(15:0/14:0), PE(14:0/18:0), PE(16:0/16:0), PE(18:0/14:0), 3-Sn-phosphatidylethanolamine	HMDB0007868, HMDB0007932, HMDB0008826, HMDB0008923, HMDB0008986, HMDB0029174	1	1	1	8.77016e-06	1.8936e-06	7.01829e-07	6.3148e-05	4.72479e-06	7.94276e-06	-2.73782	0.262561	PE(32:0)	GP
C44H78O5	M+NH4	C44H78O5+NH4+	704.619	DG(20:4(5Z,8Z,11Z,14Z)/21:0/0:0)[iso2], DG(19:0/22:4(7Z,10Z,13Z,16Z)/0:0)[iso2], DG(19:1(9Z)/22:3(10Z,13Z,16Z)/0:0)[iso2]	LMGL02010227, LMGL02010232, LMGL02010542	1	1	1	1.50887e-06	3.44431e-07	6.71733e-06	7.04264e-06	2.45892e-06	6.71831e-07	-0.247328	0.0442788	DG(41:4)	GL
C39H76NO8P	M+H	C39H76NO8P+H+	718.538	PC(15:0/16:1(9Z)), PC(16:1(9Z)/15:0), PE(14:0/20:1(11Z)), PE(14:1(9Z)/20:0), PE(16:0/18:1(11Z)), PE(16:0/18:1(9Z)), PE(16:1(9Z)/18:0), PE(18:0/16:1(9Z)), PE(18:1(11Z)/16:0), PE(18:1(9Z)/16:0), PE(20:0/14:1(9Z)), PE(20:1(11Z)/14:0)	HMDB0007936, HMDB0008000, HMDB0008834, HMDB0008866, HMDB0008926, HMDB0008927, HMDB0008958, HMDB0008990, HMDB0009022, HMDB0009055, HMDB0009218, HMDB0009250	1	1	1	2.73835e-05	6.85196e-06	5.49057e-06	0.000143252	2.71976e-05	1.89592e-05	-2.25335	0.290537	PE(34:1)	GP
C39H78NO8P	M+H	C39H78NO8P+H+	720.554	PE(13:0/21:0), PC(15:0/16:0), PC(16:0/15:0), PC(19:0/12:0), PC(12:0/19:0), PC(17:0/14:0), PE-NMe2(16:0/16:0), PE(14:0/20:0), PE(15:0/19:0), PC(11:0/20:0), PC(13:0/18:0), PC(9:0/22:0), PC(10:0/21:0), PC(20:0/11:0), PC(21:0/10:0), PC(18:0/13:0), PE(22:0/12:0), PE(21:0/13:0), PE(20:0/14:0), PE(19:0/15:0), PE(18:0/16:0), PE(17:0/17:0), PE(16:0/18:0), PE(12:0/22:0), PC(14:0/17:0)	LMGP02011252, LMGP01010532, LMGP01010562, LMGP01010967, LMGP01011327, LMGP01011499, LMGP02010325, LMGP02011243, LMGP02011231, LMGP01010417, LMGP01011346, LMGP01011266, LMGP01010396, LMGP01010996, LMGP01011061, LMGP01011581, LMGP02011165, LMGP02011169, LMGP02011180, LMGP02011185, LMGP02011205, LMGP02011213, LMGP02011225, LMGP02011258, LMGP01011366	1	1	1	7.01244e-06	4.55745e-06	1.21052e-05	4.18587e-05	3.35811e-06	1.52186e-05	-1.35202	0.250422	PE(34:0)	GP
C46H78O5	M+NH4	C46H78O5+NH4+	728.619	DG(21:0/22:6(4Z,7Z,10Z,13Z,16Z,19Z)/0:0)[iso2]	LMGL02010290	1	1	1	7.25577e-06	4.04543e-06	6.08511e-06	8.63276e-05	2.92374e-05	1.15511e-05	-2.87012	0.357429	DG(43:6)	GL
C40H78NO8P	M+H	C40H78NO8P+H+	732.554	PC(14:0/18:1(11Z)), PC(14:0/18:1(9Z)), PC(14:1(9Z)/18:0), PC(16:0/16:1(9Z)), PC(16:1(9Z)/16:0), PC(18:0/14:1(9Z)), PC(18:1(11Z)/14:0), PC(18:1(9Z)/14:0), PE(15:0/20:1(11Z)), PE(20:1(11Z)/15:0), PE-NMe(16:0/18:1(9Z))	HMDB0007872, HMDB0007873, HMDB0007904, HMDB0007969, HMDB0008001, HMDB0008032, HMDB0008064, HMDB0008097, HMDB0008900, HMDB0009252, HMDB0010569	1	1	1	6.65232e-06	3.16813e-07	2.09126e-06	2.05179e-05	1.81628e-06	2.0706e-06	-1.42952	0.206425	PC(32:1)	GP
C40H80NO8P	M+H	C40H80NO8P+H+	734.569	PC(16:0/16:0), PC(14:0/18:0), PC(18:0/14:0), PE(15:0/20:0), PE(20:0/15:0)	HMDB0000564, HMDB0007871, HMDB0008031, HMDB0008899, HMDB0009219	1	1	1	4.75213e-05	1.39177e-05	1.96344e-05	0.000349904	6.82048e-05	7.06026e-05	-2.59168	0.323181	PC(32:0)	GP
C41H78NO8P	M+H	C41H78NO8P+H+	744.554	PC(15:0/18:2(9Z,12Z)), PC(18:2(9Z,12Z)/15:0), PE(14:0/22:2(13Z,16Z)), PE(14:1(9Z)/22:1(13Z)), PE(16:0/20:2(11Z,14Z)), PE(16:1(9Z)/20:1(11Z)), PE(18:0/18:2(9Z,12Z)), PE(18:1(11Z)/18:1(11Z)), PE(18:1(11Z)/18:1(9Z)), PE(18:1(9Z)/18:1(11Z)), PE(18:1(9Z)/18:1(9Z)), PE(18:2(9Z,12Z)/18:0), PE(20:1(11Z)/16:1(9Z)), PE(20:2(11Z,14Z)/16:0), PE(22:1(13Z)/14:1(9Z)), PE(22:2(13Z,16Z)/14:0)	HMDB0007940, HMDB0008132, HMDB0008843, HMDB0008875, HMDB0008934, HMDB0008966, HMDB0008994, HMDB0009025, HMDB0009026, HMDB0009058, HMDB0009059, HMDB0009090, HMDB0009254, HMDB0009286, HMDB0009515, HMDB0009547	1	1	1	6.0438e-06	3.61955e-06	2.31844e-06	4.31753e-05	4.2743e-06	3.61693e-06	-2.09153	0.239574	PE(36:2)	GP
C41H80NO8P	M+H	C41H80NO8P+H+	746.569	PC(15:0/18:1(11Z)), PC(15:0/18:1(9Z)), PC(18:1(11Z)/15:0), PC(18:1(9Z)/15:0), PE(14:0/22:1(13Z)), PE(14:1(9Z)/22:0), PE(16:0/20:1(11Z)), PE(16:1(9Z)/20:0), PE(18:0/18:1(11Z)), PE(18:0/18:1(9Z)), PE(18:1(11Z)/18:0), PE(18:1(9Z)/18:0), PE(20:0/16:1(9Z)), PE(20:1(11Z)/16:0), PE(22:0/14:1(9Z)), PE(22:1(13Z)/14:0), PE-NMe2(16:0/18:1(9Z))	HMDB0007938, HMDB0007939, HMDB0008066, HMDB0008099, HMDB0008842, HMDB0008874, HMDB0008933, HMDB0008965, HMDB0008992, HMDB0008993, HMDB0009024, HMDB0009057, HMDB0009221, HMDB0009253, HMDB0009482, HMDB0009514, HMDB0010568	1	1	1	2.35651e-05	7.17001e-06	4.59302e-05	8.88131e-05	1.89007e-05	3.30458e-05	-0.876587	0.233758	PE(36:1)	GP
C42H82NO8P	M+H	C42H82NO8P+H+	760.585	PC(14:0/20:1(11Z)), PC(14:1(9Z)/20:0), PC(16:0/18:1(11Z)), PC(16:0/18:1(9Z)), PC(16:1(9Z)/18:0), PC(18:0/16:1(9Z)), PC(18:1(11Z)/16:0), PC(18:1(9Z)/16:0), PC(20:0/14:1(9Z)), PC(20:1(11Z)/14:0), PE(15:0/22:1(13Z)), PE(22:1(13Z)/15:0)	HMDB0007879, HMDB0007911, HMDB0007971, HMDB0007972, HMDB0008003, HMDB0008035, HMDB0008067, HMDB0008100, HMDB0008263, HMDB0008295, HMDB0008908, HMDB0009516	1	1	1	9.07487e-05	2.52399e-05	4.85577e-05	0.000530154	0.000132447	0.000144691	-2.2946	0.357429	PC(34:1)	GP
C42H84NO8P	M+H	C42H84NO8P+H+	762.601	PC(14:0/20:0), PC(16:0/18:0), PC(18:0/16:0), PC(20:0/14:0), PE(15:0/22:0), PE(22:0/15:0), PE-NMe(18:0/18:0)	HMDB0007878, HMDB0007970, HMDB0008034, HMDB0008262, HMDB0008907, HMDB0009483, HMDB0112975	1	1	1	3.67833e-06	1.41073e-06	2.48933e-06	5.98813e-05	6.86509e-06	5.56116e-06	-3.25418	0.279878	PC(34:0)	GP
C43H78NO8P	M+H	C43H78NO8P+H+	768.554	PC(15:0/20:4(5Z,8Z,11Z,14Z)), PC(15:0/20:4(8Z,11Z,14Z,17Z)), PC(20:4(5Z,8Z,11Z,14Z)/15:0), PC(20:4(8Z,11Z,14Z,17Z)/15:0), PE(16:0/22:4(7Z,10Z,13Z,16Z)), PE(16:1(9Z)/20:3(8Z,11Z,14Z)), PE(18:0/20:4(5Z,8Z,11Z,14Z)), PE(18:0/20:4(8Z,11Z,14Z,17Z)), PE(18:1(11Z)/20:3(5Z,8Z,11Z)), PE(18:1(11Z)/20:3(8Z,11Z,14Z)), PE(18:1(9Z)/20:3(5Z,8Z,11Z)), PE(18:1(9Z)/20:3(8Z,11Z,14Z)), PE(18:2(9Z,12Z)/20:2(11Z,14Z))…	HMDB0007949, HMDB0007950, HMDB0008428, HMDB0008461, HMDB0008943, HMDB0008969, HMDB0009003, HMDB0009004, HMDB0009034, HMDB0009035, HMDB0009067, HMDB0009068, HMDB0009099, HMDB0009131, HMDB0009164, HMDB0009196, HMDB0009228, HMDB0009259, HMDB0009260, HMDB0009291, HMDB0009322, HMDB0009323, HMDB0009355, HMDB0009356, HMDB0009387, HMDB0009420, HMDB0009583	1	1	1	1.14705e-05	3.96747e-06	4.00206e-06	2.35805e-05	1.71426e-06	3.07796e-06	-0.54548	0.0945349	PE(38:4)	GP
C44H80NO8P	M+H	C44H80NO8P+H+	782.569	PC(14:0/22:4(7Z,10Z,13Z,16Z)), PC(16:0/20:4(5Z,8Z,11Z,14Z)), PC(16:0/20:4(8Z,11Z,14Z,17Z)), PC(16:1(9Z)/20:3(5Z,8Z,11Z)), PC(16:1(9Z)/20:3(8Z,11Z,14Z)), PC(18:0/18:4(6Z,9Z,12Z,15Z)), PC(18:1(11Z)/18:3(6Z,9Z,12Z)), PC(18:1(11Z)/18:3(9Z,12Z,15Z)), PC(18:1(9Z)/18:3(6Z,9Z,12Z)), PC(18:1(9Z)/18:3(9Z,12Z,15Z)), PC(18:2(9Z,12Z)/18:2(9Z,12Z)), PC(18:3(6Z,9Z,12Z)/18:1(11Z)), PC(18:3(6Z,9Z,12Z)/18:1(9Z)), …	HMDB0007889, HMDB0007982, HMDB0007983, HMDB0008013, HMDB0008014, HMDB0008042, HMDB0008073, HMDB0008074, HMDB0008106, HMDB0008107, HMDB0008138, HMDB0008169, HMDB0008170, HMDB0008202, HMDB0008203, HMDB0008234, HMDB0008365, HMDB0008398, HMDB0008429, HMDB0008462, HMDB0008623	1	1	1	1.301e-05	4.39857e-06	8.14914e-06	6.33166e-05	7.43576e-06	7.47749e-06	-1.61396	0.233758	PC(36:4)	GP
C44H86NO8P	M+H	C44H86NO8P+H+	788.616	PC(14:0/22:1(13Z)), PC(14:1(9Z)/22:0), PC(16:0/20:1(11Z)), PC(16:1(9Z)/20:0), PC(18:0/18:1(11Z)), PC(18:0/18:1(9Z)), PC(18:1(11Z)/18:0), PC(18:1(9Z)/18:0), PC(20:0/16:1(9Z)), PC(20:1(11Z)/16:0), PC(22:0/14:1(9Z)), PC(22:1(13Z)/14:0), PE(15:0/24:1(15Z)), PE(24:1(15Z)/15:0)	HMDB0007887, HMDB0007919, HMDB0007978, HMDB0008010, HMDB0008037, HMDB0008038, HMDB0008069, HMDB0008102, HMDB0008266, HMDB0008298, HMDB0008526, HMDB0008558, HMDB0008915, HMDB0009747	1	1	1	1.10607e-05	3.64985e-06	7.31272e-06	8.15294e-05	1.77218e-05	2.78859e-05	-2.52928	0.371932	PC(36:1)	GP
C45H78NO8P	M+H	C45H78NO8P+H+	792.554	PC(15:0/22:6(4Z,7Z,10Z,13Z,16Z,19Z)), PC(22:6(4Z,7Z,10Z,13Z,16Z,19Z)/15:0), PE(18:0/22:6(4Z,7Z,10Z,13Z,16Z,19Z)), PE(18:1(11Z)/22:5(4Z,7Z,10Z,13Z,16Z)), PE(18:1(11Z)/22:5(7Z,10Z,13Z,16Z,19Z)), PE(18:1(9Z)/22:5(4Z,7Z,10Z,13Z,16Z)), PE(18:1(9Z)/22:5(7Z,10Z,13Z,16Z,19Z)), PE(18:2(9Z,12Z)/22:4(7Z,10Z,13Z,16Z)), PE(18:4(6Z,9Z,12Z,15Z)/22:2(13Z,16Z)), PE(20:1(11Z)/20:5(5Z,8Z,11Z,14Z,17Z)), PE(20:2(11Z,…	HMDB0007958, HMDB0008724, HMDB0009012, HMDB0009043, HMDB0009044, HMDB0009076, HMDB0009077, HMDB0009108, HMDB0009206, HMDB0009269, HMDB0009300, HMDB0009301, HMDB0009331, HMDB0009332, HMDB0009364, HMDB0009365, HMDB0009396, HMDB0009429, HMDB0009461, HMDB0009558, HMDB0009588, HMDB0009619, HMDB0009620, HMDB0009652, HMDB0009653, HMDB0009684, HMDB0113959	1	1	1	9.73627e-06	4.54861e-06	5.72799e-06	5.29927e-05	5.86466e-06	5.9605e-06	-1.69546	0.233758	PE(40:6)	GP
C46H80NO8P	M+H	C46H80NO8P+H+	806.569	PC(16:0/22:6(4Z,7Z,10Z,13Z,16Z,19Z)), PC(16:1(9Z)/22:5(4Z,7Z,10Z,13Z,16Z)), PC(16:1(9Z)/22:5(7Z,10Z,13Z,16Z,19Z)), PC(18:1(11Z)/20:5(5Z,8Z,11Z,14Z,17Z)), PC(18:1(9Z)/20:5(5Z,8Z,11Z,14Z,17Z)), PC(18:2(9Z,12Z)/20:4(5Z,8Z,11Z,14Z)), PC(18:2(9Z,12Z)/20:4(8Z,11Z,14Z,17Z)), PC(18:3(6Z,9Z,12Z)/20:3(5Z,8Z,11Z)), PC(18:3(6Z,9Z,12Z)/20:3(8Z,11Z,14Z)), PC(18:3(9Z,12Z,15Z)/20:3(5Z,8Z,11Z)), PC(18:3(9Z,12Z,15…	HMDB0007991, HMDB0008022, HMDB0008024, HMDB0008083, HMDB0008116, HMDB0008147, HMDB0008148, HMDB0008178, HMDB0008179, HMDB0008211, HMDB0008212, HMDB0008243, HMDB0008339, HMDB0008370, HMDB0008371, HMDB0008403, HMDB0008404, HMDB0008434, HMDB0008467, HMDB0008498, HMDB0008499, HMDB0008660, HMDB0008693, HMDB0008725	1	1	1	7.9376e-06	2.15366e-06	0	5.6712e-05	4.69893e-06	3.49846e-06	-2.68532	0.245311	PC(38:6)	GP
C46H84NO8P	M+H	C46H84NO8P+H+	810.601	PC(16:0/22:4(7Z,10Z,13Z,16Z)), PC(18:0/20:4(5Z,8Z,11Z,14Z)), PC(18:0/20:4(8Z,11Z,14Z,17Z)), PC(18:1(11Z)/20:3(5Z,8Z,11Z)), PC(18:1(11Z)/20:3(8Z,11Z,14Z)), PC(18:1(9Z)/20:3(5Z,8Z,11Z)), PC(18:1(9Z)/20:3(8Z,11Z,14Z)), PC(18:2(9Z,12Z)/20:2(11Z,14Z)), PC(18:3(6Z,9Z,12Z)/20:1(11Z)), PC(18:3(9Z,12Z,15Z)/20:1(11Z)), PC(18:4(6Z,9Z,12Z,15Z)/20:0), PC(20:0/18:4(6Z,9Z,12Z,15Z)), PC(20:1(11Z)/18:3(6Z,9Z,12Z)…	HMDB0007988, HMDB0008048, HMDB0008049, HMDB0008079, HMDB0008080, HMDB0008112, HMDB0008113, HMDB0008145, HMDB0008176, HMDB0008209, HMDB0008241, HMDB0008273, HMDB0008304, HMDB0008305, HMDB0008336, HMDB0008367, HMDB0008368, HMDB0008400, HMDB0008401, HMDB0008431, HMDB0008464, HMDB0008626	1	1	1	4.10421e-06	1.67682e-06	1.37695e-06	3.47355e-05	3.94239e-06	5.83239e-06	-2.63651	0.290537	PC(38:4)	GP
C48H84NO8P	M+H	C48H84NO8P+H+	834.601	PC(18:0/22:6(9Z,11Z,13Z,15Z,17Z,19)), PC(20:3(8Z,11Z,14Z)/20:3(8Z,11Z,14Z)), PC(20:5(5Z,8Z,11Z,14Z,17Z)/20:1(11Z)), PE(22:6(4Z,7Z,10Z,13Z,16Z,19Z)/21:0), PC(18:0/22:6(4Z,7Z,10Z,13Z,16Z,19Z)), PC(18:1(11Z)/22:5(7Z,10Z,13Z,16Z,19Z)), PC(18:2(9Z,12Z)/22:4(7Z,10Z,13Z,16Z)), PC(18:4(6Z,9Z,12Z,15Z)/22:2(13Z,16Z)), PC(20:1(11Z)/20:5(5Z,8Z,11Z,14Z,17Z)), PC(20:2(11Z,14Z)/20:4(5Z,8Z,11Z,14Z)), PC(20:4(5Z,…	LMGP01010823, LMGP01011888, LMGP01011945, LMGP02011156, LMGP01010821, LMGP01010846, LMGP01011639, LMGP01011728, LMGP01011828, LMGP01011858, LMGP01011917, LMGP01012051, LMGP01012079, LMGP01012107, LMGP02010004	1	1	1	2.09263e-06	1.47795e-06	0	2.32283e-05	2.72681e-06	4.06853e-06	-3.07187	0.305273	PC(40:6)	GP
C15H29NO3	M+H	C15H29NO3+H+	272.222	Tridecanoylglycine	HMDB0013317	0	1	1	3.57921e-05	3.01647e-05	5.14827e-05	6.15001e-05	6.17664e-05	6.47826e-05	-0.679191	0.621879	Tridecanoylglycine	PM
C9H14O6	M+NH4	C9H14O6+NH4+	236.113	Triacetin	LMGL03012615	1	0	1	0.000196147	0.000215957	0.000181997	0.000220901	0.000178445	0.000186497	0.0201949	0.0431414	Triacetin (Glycerol Triactetate)	GL
C11H20N2O4	M+H	C11H20N2O4+H+	245.15	Isoleucyl-Hydroxyproline, Hydroxyprolyl-Isoleucine, Hydroxyprolyl-Leucine, Leucyl-Hydroxyproline	HMDB0028908, HMDB0028866, HMDB0028867, HMDB0028930	1	0	1	0.000205101	0.000140503	0.000147059	0.000203488	0.000205007	0.000190708	-0.282443	0.371932	Isoleucyl-Hydroxyproline	PM
C18H34O2	M+H	C18H34O2+H+	283.263	Oleic acid, Elaidic acid, Vaccenic acid, (Z)-13-Octadecenoic acid, Ethyl 9-hexadecenoate, (E)-13-Octadecenoic acid, 7Z-octadecenoic acid, Octadec-9-enoic Acid	HMDB0000207, HMDB0000573, HMDB0003231, HMDB0041480, HMDB0059871, HMDB0062218, HMDB0062242, HMDB0062703	1	0	1	0.00145522	0.000935158	0.000684538	0.00114913	0.000999591	0.000682256	0.119243	0.0788026	Oleic acid, Elaidic acid, Vaccenic acid	FA
C18H37NO2	M+H	C18H37NO2+H+	300.29	Sphingosine, 3-Dehydrosphinganine, Palmitoylethanolamide	HMDB0000252, HMDB0001480, HMDB0002100	1	0	1	8.39401e-05	5.13616e-05	4.60604e-05	0.000131723	0.00010847	7.04568e-05	-0.776414	0.449573	Palmitoylethanolamide	FA
C19H40O3	M+H	C19H40O3+H+	317.305	1-Hexadecylglycerol, 1,2,4-Nonadecanetriol	LMGL01020032, LMFA05000577	1	0	1	0.000119898	6.15349e-05	2.91316e-06	3.00616e-06	8.92257e-07	9.28049e-07	5.25531	0.371932	1-Hexadecylglycerol	PM
C21H42O3	M+H	C21H42O3+H+	343.321	MG(P-18:0e/0:0/0:0), Propylene glycol stearate	HMDB0011153, HMDB0029764	1	0	1	9.8238e-05	5.92652e-05	2.30093e-05	3.48215e-05	3.01782e-05	1.18868e-05	1.2313	0.357429	MG(P-18/0)	GL
C21H44O3	M+H	C21H44O3+H+	345.336	1-Octadecylglycerol	LMGL01020033	1	0	1	2.86905e-05	1.06736e-05	0	1.16538e-06	2.54779e-07	5.66881e-07	4.30819	0.323181	1-Octadecylglycerol	GL
C24H36O2	M+H	C24H36O2+H+	357.279	Tetracosahexaenoic acid, Tetracosahexaenoic acid,n-3	HMDB0002007, HMDB0060117	1	0	1	2.40379e-05	1.45958e-05	1.30736e-06	2.05421e-05	1.80531e-05	0	0.0494512	0.015494	Tetracosahexaenoic acid	FA
C23H40O4	M+H	C23H40O4+H+	381.3	MG(0:0/20:3(11Z,14Z,17Z)/0:0), MG(0:0/20:3(5Z,8Z,11Z)/0:0), MG(0:0/20:3(8Z,11Z,14Z)/0:0), MG(20:3(11Z,14Z,17Z)/0:0/0:0), MG(20:3(5Z,8Z,11Z)/0:0/0:0), MG(20:3(8Z,11Z,14Z)/0:0/0:0), Isopersin, 2-Hydroxy-4-oxo-5,12-heneicosadien-1-yl acetate, Persin	HMDB0011545, HMDB0011546, HMDB0011547, HMDB0011575, HMDB0011576, HMDB0011577, HMDB0032735, HMDB0039403, HMDB0041103	1	0	1	6.30989e-06	7.52558e-06	1.5131e-05	1.51656e-05	2.42717e-05	7.10066e-06	-0.684026	0.262561	MG(20:3)	GL
C25H37NO2	M+H	C25H37NO2+H+	384.29	Macamide	LMFA08020160	1	0	1	4.27746e-05	1.50534e-05	1.78346e-05	7.27895e-05	3.04334e-05	2.52262e-06	-0.482944	0.104223	Macamide	FA
C23H45NO4	M+H	C23H45NO4+H+	400.342	L-Palmitoylcarnitine	HMDB0000222	1	0	1	1.173e-05	5.01812e-06	1.13768e-05	1.80441e-05	2.51833e-05	1.53533e-05	-1.05858	0.621879	L-Palmitoylcarnitine	FA
C27H46O	M+NH4	C27H46O+NH4+	404.389	5alpha-cholestanone, cholest-5-en-3alpha-ol, Cholesterol(d7), Zymostenol, cholest-8(14)-en-3beta-ol, 5alpha-cholest-22E-en-3beta-ol, 5beta-cholestanone, Furostane skeleton, Zymostenol-d7, Cholesterol, 15-dehydro-A-norcholestanol, Lathosterol, Patinosterol, 5beta-cholest-22E-en-3beta-ol, 4-cholestenol, dihydrotachysterol3 / (5E)-(10S)-10,19-dihydrovitamin D3 / (5E)-(10S)-10,19-dihydrocholecalcifer…	LMST01010174, LMST01010081, LMST01010093, LMST01010096, LMST01010097, LMST01010099, LMST01010205, LMST01070000, LMST01010365, LMST01010001, LMST01010290, LMST01010089, LMST01010316, LMST01010333, LMST01010352, LMST03020307, LMST03020308, LMST04030119, LMST04030120	1	0	1	5.52405e-06	5.74921e-06	6.15346e-06	1.34716e-05	1.72164e-05	7.9367e-05	-2.65885	0.323181	5alpha-cholestanone	ST
C23H43NO5	M+H	C23H43NO5+H+	414.321	N-stearoyl glutamic acid, 3-hydroxypalmitoleoylcarnitine	LMFA08020090, LMFA07070044	1	0	1	1.61953e-05	5.09164e-06	3.54043e-06	9.87088e-06	1.37795e-05	2.59129e-06	-0.0799268	0.0218047	3-hydroxypalmitoleoylcarnitine	FA
C26H50O4	M+H	C26H50O4+H+	427.378	Hexacosanedioic acid	LMFA01170040	1	0	1	0.000167193	0.000171111	9.64344e-05	9.4727e-05	9.42699e-05	9.36683e-05	0.621052	0.372635	Hexacosanedioic acid	FA
C25H45NO5	M+H	C25H45NO5+H+	440.337	3-hydroxylinoleoylcarnitine	LMFA07070042	1	0	1	1.18881e-05	2.72983e-06	5.80622e-07	5.32065e-06	6.67689e-06	1.17471e-06	0.206432	0.0431414	3-hydroxylinoleoylcarnitine	FA
C25H47NO5	M+H	C25H47NO5+H+	442.353	3-Hydroxy-11Z-octadecenoylcarnitine, 3-Hydroxy-9Z-octadecenoylcarnitine	HMDB0013339, HMDB0013340	1	0	1	2.15527e-05	4.60014e-06	3.4513e-06	1.76575e-05	1.35522e-05	4.90973e-06	-0.286974	0.0788026	3-Hydroxy-9Z-octadecenoylcarnitine	FA
C18H32O16	M+H	C18H32O16+H+	505.176	Maltotriose, Levan, 3-Galactosyllactose, Dextrin, 1-Kestose, Melezitose, Neokestose, Galactotriose, Nephritogenoside	HMDB0001262, HMDB0003539, HMDB0006599, HMDB0006857, HMDB0011729, HMDB0011730, HMDB0029921, HMDB0029922, HMDB0041948	1	0	1	5.24468e-05	4.59189e-05	5.84545e-07	1.87175e-06	5.50464e-07	0	5.3523	0.371932	3-Galactosyllactose	PM
C36H71NO3	M+H	C36H71NO3+H+	566.551	N-Stearoylsphingosine, Ceramide (d18:1/18:0), Cer(d18:0/18:1(11Z)), Cer(d18:0/18:1(9Z))	HMDB0000829, HMDB0004950, HMDB0011762, HMDB0011763	1	0	1	2.11965e-05	8.90129e-06	1.35417e-06	4.73698e-05	1.53173e-05	7.60197e-07	-1.01241	0.186496	Cer(d36:1)	SP
C37H70O5	M+NH4	C37H70O5+NH4+	612.556	DG(17:0/17:1(9Z)/0:0)[iso2], DG(16:0/18:1(11Z)/0:0), DG(14:0/20:1(11Z)/0:0)[iso2], DG(15:1(9Z)/19:0/0:0)[iso2], DG(18:1(9Z)/16:0/0:0), DG(16:0/18:1(9Z)/0:0), DG(16:1(9Z)/18:0/0:0)[iso2], DG(18:1(11E)/16:0/0:0), DG(12:0/22:1(11Z)/0:0)[iso2], DG(14:1(9Z)/20:0/0:0)[iso2]	LMGL02010018, LMGL02010307, LMGL02010389, LMGL02010459, LMGL02010005, LMGL02010006, LMGL02010023, LMGL02010004, LMGL02010348, LMGL02010412	1	0	1	9.90283e-06	2.60196e-06	7.54015e-06	1.74023e-05	1.20638e-05	8.58574e-06	-0.924729	0.395442	DG(34:1)	GL
C39H77NO3	M+NH4	C39H77NO3+NH4+	625.624	Cer(d16:1/23:0), Cer(d15:1/24:0)	LMSP02010017, LMSP02010045	1	0	1	5.60658e-06	0	0	1.40935e-05	1.58753e-06	0	-1.48383	0.181836	Cer(d39:1)	SP
C49H76O2	M+NH4	C49H76O2+NH4+	714.618	CE(22:6(4Z,7Z,10Z,13Z,16Z,19Z))	HMDB0006733	1	0	1	8.68365e-06	6.54497e-06	0	0	0	0	Only in Lesion	0.371932	CE(22:6)	FA
C40H80NO12P	M+H	C40H80NO12P+H+	798.549	PI-Cer(d18:0/16:0(2OH)), PI-Cer(t20:0/14:0), PI-Cer(t18:0/16:0)	LMSP03030030, LMSP03030153, LMSP03030012	1	0	1	1.05346e-05	8.53337e-06	3.82626e-06	3.59845e-07	5.43202e-07	0	4.66404	0.615959	PI-Cer(d34:0(2OH))	SP
C13H25NO4	M+H	C13H25NO4+H+	260.186	O-hexanoyl-R-carnitine, Hexanoylcarnitine	LMFA07070001, LMFA07070070	1	1	0	3.95359e-05	2.44885e-05	2.91349e-05	6.32729e-05	5.27464e-05	5.39125e-05	-0.867186	0.857902	Hexanoylcarnitine	FA
C44H84NO8P	M+H	C44H84NO8P+H+	786.601	PC(18:1(9Z)/18:1(9Z)), PC(14:0/22:2(13Z,16Z)), PC(14:1(9Z)/22:1(13Z)), PC(16:0/20:2(11Z,14Z)), PC(16:1(9Z)/20:1(11Z)), PC(18:0/18:2(9Z,12Z)), PC(18:1(11Z)/18:1(11Z)), PC(18:1(11Z)/18:1(9Z)), PC(18:1(9Z)/18:1(11Z)), PC(18:2(9Z,12Z)/18:0), PC(20:1(11Z)/16:1(9Z)), PC(20:2(11Z,14Z)/16:0), PC(22:1(13Z)/14:1(9Z)), PC(22:2(13Z,16Z)/14:0), 1,2-dioleoyl-sn-glycero-3-phosphocholine	HMDB0000593, HMDB0007888, HMDB0007920, HMDB0007979, HMDB0008011, HMDB0008039, HMDB0008070, HMDB0008071, HMDB0008103, HMDB0008135, HMDB0008299, HMDB0008331, HMDB0008559, HMDB0008590, HMDB0062690	1	1	0	2.50881e-06	1.14403e-06	0	2.60841e-05	2.67029e-06	6.52569e-06	-3.27177	0.323181	PC(36:2)	GP
C10H19NO5	M+H	C10H19NO5+H+	234.134	Hydroxypropionylcarnitine	HMDB0013125	0	1	0									Hydroxypropionylcarnitine	FA
C9H14N2O6	M+H	C9H14N2O6+H+	247.092	L-alpha-Aspartyl-L-hydroxyproline, 5,6-Dihydrouridine	HMDB0011160, HMDB0000497	0	1	0									L-alpha-Aspartyl-L-hydroxyproline	PM
C41H68O12	M+NH4	C41H68O12+NH4+	770.505	Hebevinoside VI, Melilotoside B	HMDB0034596, HMDB0041465	0	1	0									Melilotoside B	PM
C10H13N5O4	M+H	C10H13N5O4+H+	268.104	Adenosine, Deoxyguanosine	HMDB0000050, HMDB0000085	0	1	0									Adenosine	PM
C13H25NO5	M+NH4	C13H25NO5+NH4+	293.207	Hydroxyhexanoycarnitine, Serratamic acid	LMFA07070072, LMFA00000002	0	1	0									Hydroxyhexanoycarnitine	FA
C12H12O5	M+H	C12H12O5+H+	237.076	Dillapional, Austdiol, 3-(6,7-dimethoxy-2H-1,3-benzodioxol-5-yl)prop-2-enal, 3-(4,7-dimethoxy-2H-1,3-benzodioxol-5-yl)prop-2-enal	HMDB0030582, HMDB0030858, HMDB0128676, HMDB0137293	0	1	0									Austdiol	PM
C18H32O2	M+H	C18H32O2+H+	281.248	Linoleic acid, Bovinic acid, 9E,11E-Octadecadienoic acid, 10E,12Z-Octadecadienoic acid, Linoelaidic acid, Mangiferic acid, Linalyl caprylate, Ethyl 2E,4Z-hexadecadienoate, 5-Octadecynoic acid, Dihomolinoleic acid, 6Z,9Z-octadecadienoic acid, Octadecadienoate	HMDB0000673, HMDB0003797, HMDB0005047, HMDB0005048, HMDB0006270, HMDB0029800, HMDB0030430, HMDB0031051, HMDB0031097, HMDB0061864, HMDB0062238, HMDB0062784	1	0	0									Linoleic acid	FA
C45H78O2	M+NH4	C45H78O2+NH4+	668.634	16:1 Sitosteryl ester, 16:0 Stigmasteryl ester, 18:1 Cholesteryl ester, 18:1 Cholesteryl ester (d5)	LMST01020056, LMST01020054, LMST01020003, LMST01020030	1	0	0									18:1 Cholesteryl ester	ST
C21H34O5	M+H	C21H34O5+H+	367.248	3b-Allotetrahydrocortisol, 5a-Tetrahydrocortisol, Tetrahydrocortisol, Cortolone, Beta-Cortolone	HMDB0000314, HMDB0000526, HMDB0000949, HMDB0003128, HMDB0013221	1	0	0									Tetrahydrocortisol	ST
C25H42O4	M+H	C25H42O4+H+	407.316	MG(0:0/22:4(7Z,10Z,13Z,16Z)/0:0), MG(22:4(7Z,10Z,13Z,16Z)/0:0/0:0)	HMDB0011554, HMDB0011584	1	0	0									N-propyl N-(2-hydroxy-ethyl) arachidonoyl amine	FA
C25H45NO4	M+H	C25H45NO4+H+	424.342	Linoelaidyl carnitine, Linoleyl carnitine	HMDB0006461, HMDB0006469	1	0	0									Linoleyl carnitine	FA
C36H69NO3	M+H	C36H69NO3+H+	564.535	Cer(d14:2(4E,6E)/22:0), Cer(d16:2(4E,6E)/20:0), Cer(d18:1/18:1(9Z)), Cer(d14:1/22:1), Cer(d16:1/20:1)	LMSP02010056, LMSP02010063, LMSP02010003, LMSP02010039, LMSP02010048	1	0	0									Cer(d36:2)	SP
C41H76O5	M+NH4	C41H76O5+NH4+	666.603	DG(18:0/20:2(11Z,14Z)/0:0)[iso2], DG(17:2(9Z,12Z)/21:0/0:0)[iso2], DG(16:0/22:2(13Z,16Z)/0:0)[iso2], DG(19:1(9Z)/19:1(9Z)/0:0), DG(18:2(9Z,12Z)/20:0/0:0)[iso2], DG(18:1(9Z)/20:1(11Z)/0:0)[iso2], DG(16:1(9Z)/22:1(13Z)/0:0)[iso2]	LMGL02010091, LMGL02010123, LMGL02010127, LMGL02010330, LMGL02010089, LMGL02010090, LMGL02010115	1	0	0									DG(38:2)	GL
C41H78O5	M+NH4	C41H78O5+NH4+	668.619	DG(14:0/24:1(15Z)/0:0), DG(14:1(9Z)/24:0/0:0), DG(16:0/22:1(13Z)/0:0), DG(16:1(9Z)/22:0/0:0), DG(18:0/20:1(11Z)/0:0), DG(18:1(11Z)/20:0/0:0), DG(18:1(9Z)/20:0/0:0), DG(20:0/18:1(11Z)/0:0), DG(20:0/18:1(9Z)/0:0), DG(20:1(11Z)/18:0/0:0), DG(22:0/16:1(9Z)/0:0), DG(22:1(13Z)/16:0/0:0), DG(24:0/14:1(9Z)/0:0), DG(24:1(15Z)/14:0/0:0), DG(20:0/0:0/18:1n7), DG(20:0/0:0/18:1n9), DG(16:0/0:0/22:1n9), DG(22:…	HMDB0007036, HMDB0007064, HMDB0007116, HMDB0007144, HMDB0007166, HMDB0007194, HMDB0007223, HMDB0007362, HMDB0007363, HMDB0007390, HMDB0007592, HMDB0007620, HMDB0007792, HMDB0007820, HMDB0056067, HMDB0056068, HMDB0056020, HMDB0056090, HMDB0056044, HMDB0055966, HMDB0056112	1	0	0									DG(38:1)	GL

## Sheet: PSA MAP
Neurotransmitter Mass Range
						Replicate Detection			Lesion (TIC-Normalized Average Ion Abundance)			Healthy (TIC-Normalized Average Ion Abundance)
formula	adduct	ion	mz	moleculeNames	moleculeIds	I	II	III	I	II	III	I	II	III	log2(Fold Change) (Lesion/Healthy)	"-log10(BH-Adjusted P-Value)"	Selected Annotation	Category	Gel Component
C18H35NO	M+H	C18H35NO+H+	282.279	Oleamide	HMDB0002117	1	1	1	2.71839e-05	5.98027e-05	4.29177e-05	5.85425e-05	7.79656e-05	0.000128819	-1.03032	0.187354	Oleamide	FA	Edge
C8H9NO2	M+H	C8H9NO2+H+	152.071	Acetaminophen, 2-Phenylglycine, Dopamine quinone, Leukoaminochrome, Methyl 2-aminobenzoate, 2-(Methylamino)benzoic acid, 2-Amino-3-methylbenzoate	HMDB0001859, HMDB0002210, HMDB0012219, HMDB0012992, HMDB0029703, HMDB0032609, HMDB0060680	1	1	1	0.00122694	0.00188611	0.00178036	0.00234135	0.00230654	0.00434216	-0.877488	0.187354	Dopamine quinone	PM	Edge
C8H11NO3	M+H	C8H11NO3+H+	170.081	Norepinephrine, Pyridoxine, 6-Hydroxydopamine, 5-Hydroxydopamine	HMDB0000216, HMDB0000239, HMDB0001537, HMDB0004817	1	1	1	0.000391207	0.000542016	0.000459998	0.000855605	0.000658682	0.000846643	-0.760932	0.187354	Norepinephrine	PM	Edge
C8H7NO2	M+H	C8H7NO2+H+	150.055	5,6-Dihydroxyindole, NAPQI	HMDB0004058, HMDB0060946	1	1	1	3.02093e-05	0.000109526	7.58479e-05	6.86737e-05	0.000138799	0.000140769	-0.691844	0.187354	5,6-Dihydroxyindole	PM	Edge
C8H11NO2	M+H	C8H11NO2+H+	154.086	Dopamine, p-Octopamine, Vanillylamine	HMDB0000073, HMDB0004825, HMDB0012309	1	1	1	8.02778e-05	0.000232375	0.000220065	8.90796e-05	0.000267816	0.000498009	-0.682394	0.164256	Dopamine	PM	Edge
C9H11NO4	M+H	C9H11NO4+H+	198.076	L-Dopa, DL-Dopa	HMDB0000181, HMDB0000609	1	1	1	1.31681e-05	4.79709e-05	3.96357e-05	4.2549e-05	5.52863e-05	5.83849e-05	-0.632448	0.187354	L-Dopa	PM	Edge
C7H6O2	M+NH4	C7H6O2+NH4+	140.071	4-Hydroxybenzaldehyde	HMDB0011718	1	1	1	0.000583039	0.00159695	0.00169687	0.00129557	0.00190961	0.00262324	-0.588218	0.187354	4-Hydroxybenzaldehyde	PM	Edge
C6H5NO2	M+H	C6H5NO2+H+	124.039	Nicotinic acid, Picolinic acid, 2-Hydroxy-4-imino-2,5-cyclohexadienone, Isonicotinic acid	HMDB0001488, HMDB0002243, HMDB0031713, HMDB0060665	1	1	1	6.95951e-05	0.000129551	0.000105676	0.000132556	0.000151556	0.000170942	-0.578075	0.187354	Picolinic acid	PM	Edge
C6H7NO3	M+H	C6H7NO3+H+	142.05	2-Aminomuconic acid semialdehyde	HMDB0001280	1	1	1	2.11212e-05	7.92553e-05	8.00421e-05	6.28843e-05	9.36574e-05	0.000112568	-0.576847	0.187354	2-Aminomuconic acid semialdehyde	FA	Edge
C5H7NO2	M+H	C5H7NO2+H+	114.055	1-Pyrroline-5-carboxylic acid, 1-Pyrroline-2-carboxylic acid	HMDB0001301, HMDB0006875	1	1	1	0.000382484	0.000938298	0.000847169	0.00128629	0.00106507	0.000822663	-0.54998	0.187354	1-Pyrroline-5-carboxylic acid	PM	Edge
C8H7NO	M+H	C8H7NO+H+	134.06	Indoxyl, 4-Hydroxybenzeneacetonitrile, 2-Methyl-4,5-benzoxazole	HMDB0004094, HMDB0029757, HMDB0032390	1	1	1	8.29941e-05	0.000148465	0.000119331	0.000129389	0.000179513	0.000200822	-0.539108	0.187354	5-Hydroxyindole	PM	Edge
C4H7NO	M+H	C4H7NO+H+	86.06	2-Pyrrolidinone	HMDB0002039	1	1	1	0.00499147	0.00587119	0.00503467	0.00880511	0.00703765	0.0069129	-0.51744	0.187354	2-Pyrrolidinone	PM	Edge
C8H9NO4	M+H	C8H9NO4+H+	184.06	4-Pyridoxic acid	HMDB0000017	1	1	1	7.32723e-06	3.08003e-05	2.70914e-05	2.1017e-05	3.70938e-05	2.77562e-05	-0.396812	0.164256	4-Pyridoxic acid	PM	Edge
C11H12O3	M+NH4	C11H12O3+NH4+	210.112	Dehydrozingerone, (R)-Shinanolone, Methyl trans-p-methoxycinnamate, Allyl phenoxyacetate, 1-(4-methoxy-1-benzofuran-5-yl)ethan-1-ol, 2,2-dimethyl-2H-chromene-5,7-diol, 2,2-dimethyl-2H-chromene-5,6-diol, 5,5-dimethyl-3,6-dioxatricyclo[5.4.0.0Â²,â´]undeca-1(11),7,9-trien-11-ol, 2-(hydroxymethyl)-2-methyl-2H-chromen-5-ol, ethyl (2E)-3-(4-hydroxyphenyl)prop-2-enoate, 4-(4-hydroxy-3-methoxyphenyl)but…	HMDB0032591, HMDB0030580, HMDB0030752, HMDB0031610, HMDB0129370, HMDB0126380, HMDB0126381, HMDB0126382, HMDB0126383, HMDB0131282, HMDB0133439, HMDB0133477, HMDB0133482, HMDB0133510, HMDB0133534	1	1	1	9.12961e-06	1.77114e-05	4.09522e-05	1.99385e-05	2.01348e-05	4.82591e-05	-0.381801	0.120824	Dehydrozingerone	PM	Edge
C7H11NO4	M+H	C7H11NO4+H+	174.076	N-Acetyl-L-glutamate 5-semialdehyde	HMDB0006488	1	1	1	3.89859e-05	9.62034e-05	0.000106705	8.74319e-05	0.000104454	0.000115026	-0.343449	0.18019	N-Acetyl-L-glutamate 5-semialdehyde	PM	Edge
C10H12O2	M+NH4	C10H12O2+NH4+	182.118	1-Phenylethyl acetate, Benzenebutanoic acid, 3-Phenylbutyric acid, Methyl 3-phenylpropanoate, Benzyl propionate, Propyl benzoate, Isopropyl benzoate, 3-Hydroxy-4-phenylbutan-2-one, 3-(4-Methoxyphenyl)-2-propen-1-ol, Ethyl phenylacetate, Thymoquinone, 4-Isopropylbenzoic acid, 1-ethenyl-3,5-dimethoxybenzene, 4-(3-hydroxyphenyl)butan-2-one, 2-hydroxy-2-methyl-3-phenylpropanal, 2-benzyl-3-hydroxyprop…	HMDB0032620, HMDB0000543, HMDB0001955, HMDB0030060, HMDB0030063, HMDB0031761, HMDB0032038, HMDB0032336, HMDB0032586, HMDB0032618, HMDB0034732, HMDB0035268, HMDB0127494, HMDB0133507, HMDB0133600, HMDB0133601, HMDB0133603, HMDB0133604, HMDB0133605, HMDB0133606, HMDB0133607, HMDB0133608, HMDB0133609, HMDB0133610, HMDB0133617, HMDB0133725, HMDB0133727, HMDB0133729, HMDB0133753, HMDB0133754, HMDB01357…	1	1	1	9.99157e-05	0.000191454	0.000188346	0.000151627	0.000219328	0.00021604	-0.291167	0.18019	Phenyl butyrate	PM	Edge
C10H13NO2	M+H	C10H13NO2+H+	180.102	3,5-Dimethylphenyl methylcarbamate, 2(N)-Methyl-norsalsolinol, (R)-Salsolinol, Maltoxazine, 1,2,3,4,5,6-Hexahydro-5-(1-hydroxyethylidene)-7H-cyclopenta[b]pyridin-7-one, Salsolinol	HMDB0031811, HMDB0001189, HMDB0005199, HMDB0030372, HMDB0039655, HMDB0042012	0	1	1	0.000253848	0.00016336	0.000194374	0.000213895	0.000172881	0.000194448	0.0734523	0.0765229	alpha-Methylphenylalanine	PM	Edge
C4H4O2	M+H	C4H4O2+H+	85.0284	4-Hydroxy-2-butenoic acid gamma-lactone	HMDB0032330	1	1	1	0.00769383	0.00455043	0.00535369	0.00779618	0.00496018	0.00359603	0.105907	0.0596706	4-Hydroxy-2-butenoic acid gamma-lactone	PM	Edge
C10H13NO3	M+H	C10H13NO3+H+	196.097	N-Acetyldopamine, 2-Phenyl-1,3-propanediol monocarbamate	HMDB0041943, HMDB0060351	1	1	1	2.3001e-05	4.39164e-05	0.000105151	3.01251e-05	4.96585e-05	7.73706e-05	0.130805	0.0405473	N-Acetyldopamine	PM	Edge
C5H6N2O2	M+H	C5H6N2O2+H+	127.05	Thymine, Imidazoleacetic acid, 1H-Imidazole-1-acetic acid	HMDB0000262, HMDB0002024, HMDB0029736	1	1	1	0.000146212	0.000168377	7.64035e-05	3.07028e-05	0.000190921	0.000131984	0.14499	0.0534628	Imidazoleacetic acid	PM	Edge
C4H6O3	M+H	C4H6O3+H+	103.039	3-methyl pyruvic acid, 4-hydroxy-crotonic acid, 2-methyl-3-oxo-propanoic acid, 3-hydroxybut-2-enoic acid, (S)-Methylmalonic acid semialdehyde, Acetoacetic acid, Succinic acid semialdehyde	LMFA01060002, LMFA01050398, LMFA01060193, LMFA01030978, LMFA01060190, LMFA01060003, LMFA06000118	1	1	1	0.000703748	0.000845684	0.00135688	0.000961233	0.000875099	0.000672654	0.212087	0.128977	Succinic acid semialdehyde	PM	Edge
C6H4O2	M+NH4	C6H4O2+NH4+	126.055	Quinone, 1,2-Benzoquinone	HMDB0003364, HMDB0012133	1	1	1	0.000611595	0.00116895	0.00356763	0.00123194	0.00143576	0.00132991	0.419907	0.108785	Quinone	PM	Edge
C8H8O4	M+H	C8H8O4+H+	169.05	3-Hydroxymandelic acid, 2',4',6'-Trihydroxyacetophenone, 3,4-Dihydroxymandelaldehyde, 2,6-Dimethoxy-1,4-benzoquinone, Homogentisic acid, p-Hydroxymandelic acid, 3,4-Dihydroxybenzeneacetic acid, 3-hydroxy-5-methoxybenzoic acid, 2-hydroxy-4-methoxybenzoic acid, 3-hydroxy-2-methoxybenzoic acid	HMDB0000750, HMDB0029644, HMDB0006242, HMDB0029673, HMDB0000130, HMDB0000822, HMDB0001336, HMDB0125536, HMDB0131176, HMDB0140902	1	1	1	4.66431e-05	6.28792e-05	0.000214813	8.22889e-05	6.30194e-05	6.45398e-05	0.628141	0.145958	3,4-Dihydroxybenzeneacetic acid (DOPAC)/2-Hydroxymandelic acid	PM	Edge
C7H9N3O4	M+H	C7H9N3O4+H+	200.067	(S)-Isowillardiine	HMDB0030376	1	1	1	1.58781e-05	0	0.00041317	0	0	0	Only in Lesion	0.18019	(S)-Isowillardiine/Willardiine	PM	Edge
C7H6O4	M+H	C7H6O4+H+	155.034	2,4-Dihydroxybenzoic acid, Gentisic acid, 2-Pyrocatechuic acid, 2,6-Dihydroxybenzoic acid, 3,5-Dihydroxybenzoic acid, 2,4,6-trihydroxybenzaldehyde	HMDB0029666, HMDB0000152, HMDB0000397, HMDB0013676, HMDB0013677, HMDB0125090	0	1	0									Gentisic acid	PM	Edge
C10H9NO	M+H	C10H9NO+H+	160.076	Indoleacetaldehyde	HMDB0001190	1	1	1	9.89913e-06	1.62763e-05	2.11201e-05	1.57782e-05	1.8974e-05	3.54694e-05	-0.570212	0.187354	Indoleacetaldehyde	PM	Edge
C8H9NO3	M+H	C8H9NO3+H+	168.066	Pyridoxal, Isopyridoxal	HMDB0001545, HMDB0004290	1	1	1	0.000203558	0.000408029	0.000441018	0.000441517	0.000506418	0.000550521	-0.509513	0.187354	Pyridoxal	PM	Edge
C8H7NO3	M+H	C8H7NO3+H+	166.05	Formylanthranilic acid, 4-Pyridoxolactone, 5-Pyridoxolactone, Noradrenochrome	HMDB0004089, HMDB0003454, HMDB0004291, HMDB0013030	1	1	1	1.66533e-05	6.09255e-05	5.89208e-05	3.80057e-05	7.30439e-05	6.06503e-05	-0.330991	0.145958	Formylanthranilic acid	PM	Edge
C5H4O3	M+H	C5H4O3+H+	113.023	3-Furoic acid, 2-Furoic acid	HMDB0000444, HMDB0000617	0	1	1	0.000205535	0.000145029	0.000816548	0.000157925	0.000152987	0.000102731	1.49648	0.187354	3-Furoic acid	PM	Edge
C6H14N2O	M+H	C6H14N2O+H+	131.118	N-Acetylputrescine	HMDB0002064	1	1	1	1.27085e-06	4.31136e-06	4.26861e-06	9.29432e-06	5.09494e-06	1.24321e-05	-1.44506	0.187354	N-Acetylputrescine	PM	Yes
C23H34O2	M+NH4	C23H34O2+NH4+	360.29	TrHA, 6Z,8E-tricosdien-4,19-diynoic acid	LMFA01030853, LMFA01031128	1	1	1	6.78782e-06	9.66528e-07	1.08882e-06	2.17041e-05	1.16832e-06	3.34731e-06	-1.56802	0.164256	TrHA	FA
C4H7NOS	M+H	C4H7NOS+H+	118.032	Homocysteine thiolactone	HMDB0002287	1	1	1	0.00154756	0.000167219	0.000122122	0.00460646	0.000197499	0.000165604	-1.43584	0.142208	Homocysteine thiolactone	PM
C27H44O4	M+NH4	C27H44O4+NH4+	450.358	24-Hydroxycalcitriol, 3beta,7alpha-Dihydroxy-5-cholestenoate, Neochlorogenin, Rockogenin, 23S,25,26-Trihydroxyvitamin D3, 4-cholesten-7Î±,12Î±,24-triol-3-one, 7alpha,12alpha,26-trihydroxycholest-4-en-3-one, 1alpha,23(S),25-trihydroxyvitamin D3, 3alpha,7beta-dihydroxy-5beta-cholest-24-en-26-oic Acid	HMDB0006228, HMDB0012454, HMDB0030702, HMDB0033769, HMDB0060134, HMDB0062399, HMDB0062400, HMDB0062686, HMDB0062712	1	1	1	1.6576e-06	8.17824e-06	7.95085e-06	6.03901e-06	1.04531e-05	2.7591e-05	-1.30943	0.187354	Calcitetrol	ST
C6H11N3	M+H	C6H11N3+H+	126.103	1-Methylhistamine, 3-Methylhistamine	HMDB0000898, HMDB0001861	1	1	1	4.98897e-06	3.0851e-05	1.89008e-05	3.076e-05	3.81707e-05	5.12931e-05	-1.13503	0.187354	1-Methylhistamine	PM
C4H12N2	M+H	C4H12N2+H+	89.1073	Putrescine	HMDB0001414	1	1	1	6.74292e-05	0.000249918	0.000175481	0.000226189	0.000327787	0.000495034	-1.08987	0.187354	Putrescine	PM
C10H12N2	M+H	C10H12N2+H+	161.107	Tryptamine	HMDB0000303	1	1	1	1.6124e-05	2.92799e-05	3.01986e-05	4.28345e-05	3.61571e-05	8.14445e-05	-1.08549	0.187354	Tryptamine	PM
C12H14N2	M+H	C12H14N2+H+	187.123	1,2,3,4-Tetrahydro-2-methyl-b-carboline	HMDB0029836	1	1	1	1.86401e-06	2.24506e-05	2.31834e-05	1.17425e-05	2.75616e-05	6.05212e-05	-1.07154	0.187354	1,2,3,4-Tetrahydro-2-methyl-b-carboline	PM
C22H35NO2	M+H	C22H35NO2+H+	346.274	Anandamide (20:5,n-3)	LMFA08040008	1	1	1	0.000159849	6.91811e-05	5.28984e-05	0.000415643	8.1193e-05	9.4591e-05	-1.06887	0.17423	Anandamide (20:5,n-3)	FA
C11H12N2	M+H	C11H12N2+H+	173.107	1,2,3,4-Tetrahydro-beta-carboline	HMDB0012488	1	1	1	5.67487e-06	1.06884e-05	1.28209e-05	1.03721e-05	1.25873e-05	3.73962e-05	-1.0483	0.187354	1,2,3,4-Tetrahydro-beta-carboline	PM
C20H34O	M+NH4	C20H34O+NH4+	308.295	Presphaerol, (-)-Dilophol, 8-[3]-ladderane-1-octanol, cis-9,10-Epoxy-1,3Z,6Z-eicosatriene, 5-(1-methoxybutan-2-yl)isolongifol-5-ene, Geranylgeraniol, aphidicolan-16beta-ol, Verrucosan-2b-ol, (+)-Verticillol, (+)-Tormesol, (Z,Z,Z)-geranylgeraniol, tuberculosinol	LMPR0104220002, LMPR0104450002, LMFA05000066, LMFA12000308, LMPR0103500014, LMPR0104010009, LMPR0104160002, LMPR0104280002, LMPR0104380001, LMPR0104530001, LMPR0104010018, LMPR0104030005	1	1	1	1.20014e-05	2.62296e-05	1.42103e-05	2.22666e-05	3.37129e-05	5.1471e-05	-1.0349	0.187354	FA(20:3)	FA
C18H35NO4	M+H	C18H35NO4+H+	330.264	4,8 Dimethylnonanoyl carnitine, Undecanoylcarnitine	HMDB0006202, HMDB0013321	1	1	1	1.00763e-05	2.05446e-05	7.69844e-06	2.459e-05	2.70869e-05	2.67464e-05	-1.03321	0.187354	Undecanoylcarnitine	FA
C5H9N3	M+H	C5H9N3+H+	112.087	Histamine	HMDB0000870	1	1	1	7.32967e-06	1.74719e-05	1.31585e-05	2.48768e-05	2.20664e-05	2.89664e-05	-0.999801	0.187354	Histamine	PM
C20H36O	M+NH4	C20H36O+NH4+	310.31	9S,10R-Epoxy-3Z,6Z-eicosadiene, 6R,7S-Epoxy-3Z,9Z-eicosadiene, 6S,7R-Epoxy-3Z,9Z-eicosadiene, 3,4-Epoxy-6Z,9Z-eicosadiene, 3,7,11,15-Tetramethyl-6,10,14-hexadecatrien-1-ol, 9R,10S-Epoxy-3Z,6Z-eicosadiene	LMFA12000310, LMFA12000311, LMFA12000312, LMFA12000313, LMFA05000210, LMFA12000309	1	1	1	6.5302e-06	1.19624e-05	1.31955e-05	1.71807e-05	1.57142e-05	2.9927e-05	-0.987326	0.187354	FA(20:2)	FA
C10H12N2O	M+H	C10H12N2O+H+	177.102	Serotonin, Cotinine	HMDB0000259, HMDB0001046	1	1	1	2.08139e-05	5.22065e-05	4.76985e-05	5.50291e-05	6.56191e-05	0.000116749	-0.975653	0.187354	Serotonin	PM
C10H20O3	M+NH4	C10H20O3+NH4+	206.175	3-Hydroxycapric acid, (R)-3-Hydroxydecanoic acid, (1R,2R,4R,8R)-p-Menthane-2,8,9-triol, 7-Methyl-3-methylene-1,6,7-octanetriol, cis-p-Menthane-1,7,8-triol, 2,6-Dimethyl-7-octene-2,3,6-triol, (1S,2S,4R,8R)-p-Menthane-1,2,9-triol, 2-Hexyl-1,3-dioxolane-4-methanol, (1R,2R,4S)-p-Menthane-1,2,8-triol, xi-5-Hydroxydecanoic acid, Ethyl (Â±)-3-hydroxyoctanoate	HMDB0002203, HMDB0010725, HMDB0033574, HMDB0033640, HMDB0034783, HMDB0038186, HMDB0039470, HMDB0039669, HMDB0039893, HMDB0040329, HMDB0041600	1	1	1	2.2422e-06	1.39832e-05	1.32064e-05	1.05467e-05	1.62759e-05	3.05809e-05	-0.963762	0.187354	3-Hydroxycapric acid	PM
C21H36O	M+NH4	C21H36O+NH4+	322.31	pregnan-21-ol, 3-pentadecylphenol, 9S,10R-Epoxy-1,3Z,6Z-heneicosatriene	LMST02030174, LMPK15010004, LMFA12000319	1	1	1	2.55284e-05	5.34884e-05	2.64331e-05	3.64716e-05	6.90549e-05	0.000100132	-0.963693	0.187354	pregnan-21-ol	ST
C11H14N2O	M+H	C11H14N2O+H+	191.118	5-Methoxytryptamine, N-Methylserotonin, Alline	HMDB0004095, HMDB0004369, HMDB0030533	1	1	1	9.44177e-06	3.36973e-05	3.50715e-05	2.96077e-05	3.97734e-05	8.15923e-05	-0.948858	0.187354	5-Methoxytryptamine	PM
C5H7N3O	M+H	C5H7N3O+H+	126.066	5-Methylcytosine, 2-O-Methylcytosine, 3-Methylcytosine	HMDB0002894, HMDB0004339, HMDB0011601	1	1	1	6.92128e-06	2.92382e-05	3.21063e-05	2.93028e-05	3.82974e-05	6.39073e-05	-0.945909	0.187354	5-Methylcytosine	PM
C8H7N	M+NH4	C8H7N+NH4+	135.092	Indole	HMDB0000738	1	1	1	0.000178536	0.000256926	0.000216725	0.000320681	0.000325909	0.000607915	-0.943761	0.187354	Indole	PM
C12H11NO	M+NH4	C12H11NO+NH4+	203.118	4-Hydroxydiphenylamine	HMDB0032597	1	1	1	1.86335e-06	5.53239e-06	6.27381e-06	3.95181e-06	6.64996e-06	1.55082e-05	-0.933633	0.187354	N-hydroxy-4-aminobiphenyl	PM
C9H10N2	M+H	C9H10N2+H+	147.092	Dimethylbenzimidazole, 1H-Indole-3-methanamine, Myosmine, 1,4-Dimethylpyrrolo[1,2-a]pyrazine, 3,4-Dimethylpyrrolo[1,2-a]pyrazine, 1,3-Dimethylpyrrolo[1,2-a]pyrazine	HMDB0003701, HMDB0029740, HMDB0030386, HMDB0030906, HMDB0030907, HMDB0030908	1	1	1	2.20781e-05	4.55661e-05	4.10784e-05	5.14034e-05	5.61362e-05	9.98759e-05	-0.931872	0.187354	1H-Indole-3-methanamine	PM
C10H16N4O7S	M+H	C10H16N4O7S+H+	337.081	S-Nitrosoglutathione	HMDB0004645	1	1	1	6.13287e-07	2.55516e-06	2.46651e-06	5.57358e-07	3.40356e-06	6.72494e-06	-0.923225	0.17423	S-Nitrosoglutathione	PM
C11H10N2	M+H	C11H10N2+H+	171.092	2-Amino-5-phenylpyridine	HMDB0029747	1	1	1	2.43294e-06	3.98739e-06	3.58102e-06	4.71415e-06	4.83477e-06	9.25727e-06	-0.911013	0.187354	10-hydroperoxy-H4-neuroprostane	PM
C13H25NO5	M+H	C13H25NO5+H+	276.181	Hydroxyhexanoycarnitine	HMDB0013131	1	1	1	1.12049e-05	1.84589e-05	1.52446e-05	1.98598e-05	2.41485e-05	3.94017e-05	-0.893241	0.187354	Hydroxyhexanoycarnitine	FA
C12H16N2	M+H	C12H16N2+H+	189.139	Dimethyltryptamine	HMDB0005973	1	1	1	2.22521e-06	5.81101e-06	1.54829e-05	6.89117e-06	6.90927e-06	2.97361e-05	-0.88839	0.162439	Dimethyltryptamine	PM
C13H25NO3	M+NH4	C13H25NO3+NH4+	261.217	N-Undecanoylglycine	HMDB0013286	1	1	1	1.09312e-06	1.46197e-05	1.19601e-05	5.86973e-06	1.72281e-05	2.79843e-05	-0.884341	0.185988	N-Undecanoylglycine	PM
C4H11NO	M+H	C4H11NO+H+	90.0913	Dimethylethanolamine	HMDB0032231	1	1	1	0.00270955	0.00509614	0.0049994	0.00629777	0.00629179	0.0109573	-0.878817	0.187354	Dimethylethanolamine	PM
C14H20N2O3	M+H	C14H20N2O3+H+	265.155	Phenylalanyl-Valine, Valyl-Phenylalanine, (2E)-N-(4-aminobutyl)-3-(4-hydroxy-3-methoxyphenyl)prop-2-enimidic acid, N-(4-aminobutyl)-3-(4-hydroxy-3-methoxyphenyl)prop-2-enimidic acid	HMDB0029008, HMDB0029134, HMDB0139553, HMDB0139638	1	1	1	4.56789e-07	7.83944e-06	8.98039e-06	5.9909e-06	8.69908e-06	1.70458e-05	-0.87729	0.187354	Phenylalanyl-Valine	PM/AA
C12H22O4	M+NH4	C12H22O4+NH4+	248.186	Dodecanedioic acid, Bis(1-methylethyl) hexanedioate, Dipropyl hexanedioate	HMDB0000623, HMDB0041613, HMDB0041614	1	1	1	3.25232e-05	3.49379e-05	1.93792e-05	7.84181e-05	4.04167e-05	3.97894e-05	-0.869177	0.187354	Dodecanedioic acid	FA
C9H12N2O	M+H	C9H12N2O+H+	165.102	Kynuramine	HMDB0012246	1	1	1	4.78927e-05	0.00015468	0.000143722	0.000136424	0.000185055	0.000309444	-0.865466	0.187354	Kynuramine	PM
C11H22O3	M+NH4	C11H22O3+NH4+	220.191	2-hydroxy hendecanoic acid, 3-Hydroxynonyl acetate, 10-hydroxy-undecanoic acid, 3-hydroxy-undecanoic acid, 4-hydroxy-undecanoic acid, 3S-hydroxy-undecanoic acid, omega-hydroxy hendecanoic acid	LMFA01050034, LMFA07010753, LMFA01050161, LMFA01050162, LMFA01050163, LMFA01050327, LMFA01050035	1	1	1	7.8308e-06	3.43796e-05	2.62503e-05	2.9839e-05	3.90347e-05	5.54374e-05	-0.860608	0.187354	3S-hydroxy-undecanoic acid	FA
C7H7NO	M+NH4	C7H7NO+NH4+	139.087	Benzamide	HMDB0004461	1	1	1	7.74681e-05	0.000263702	0.000295226	0.000370367	0.000326858	0.00045754	-0.8596	0.187354	Benzamide	PM
C12H16N2O3	M+H	C12H16N2O3+H+	237.123	Alanyl-Phenylalanine, Phenylalanyl-Alanine, O-Desmethyl-lacosamide	HMDB0028694, HMDB0028988, HMDB0060855	1	1	1	5.89339e-06	3.05112e-05	3.00631e-05	2.88609e-05	3.68118e-05	5.46336e-05	-0.855987	0.187354	Alanyl-Phenylalanine	PM/AA
C10H16N2O3	M+H	C10H16N2O3+H+	213.123	L-prolyl-L-proline	HMDB0011180	1	1	1	4.81289e-06	2.00672e-05	2.08136e-05	1.56981e-05	2.48902e-05	4.06751e-05	-0.830609	0.187354	L-prolyl-L-proline	PM/AA
C11H14N2O3	M+H	C11H14N2O3+H+	223.108	Glycyl-Phenylalanine, Phenylalanyl-Glycine	HMDB0028848, HMDB0028995	1	1	1	6.20038e-06	3.00968e-05	2.79694e-05	2.80787e-05	3.52613e-05	5.08125e-05	-0.828822	0.187354	Phenylalanyl-Glycine	PM/AA
C10H12N2O3	M+H	C10H12N2O3+H+	209.092	L-Kynurenine, Formyl-5-hydroxykynurenamine, 4-Aminobenzoyl-(beta)-alanine	HMDB0000684, HMDB0012948, HMDB0060757	1	1	1	2.22183e-06	1.32915e-05	1.18331e-05	9.99085e-06	1.48149e-05	2.36189e-05	-0.824393	0.187354	L-Kynurenine	PM
C9H12N2O2	M+H	C9H12N2O2+H+	181.097	5-Hydroxykynurenamine, Tyrosinamide, L-2-Amino-3-(4-aminophenyl)propanoic acid, (4-Ethoxyphenyl)urea	HMDB0004076, HMDB0013319, HMDB0030397, HMDB0032565	1	1	1	1.47626e-05	5.60427e-05	5.2727e-05	4.62408e-05	6.91326e-05	0.000101849	-0.814284	0.187354	5-Hydroxykynurenamine	PM
C8H12N2O2	M+H	C8H12N2O2+H+	169.097	Pyridoxamine	HMDB0001431	1	1	1	2.77447e-05	0.000117157	0.000111747	9.89726e-05	0.000141688	0.000208789	-0.808363	0.187354	Pyridoxamine	PM
C12H24N2O3	M+H	C12H24N2O3+H+	245.186	Isoleucyl-Isoleucine, Isoleucyl-Leucine, Leucyl-Isoleucine, Leucyl-Leucine	HMDB0028910, HMDB0028911, HMDB0028932, HMDB0028933	1	1	1	1.25254e-05	5.86416e-05	3.43925e-05	4.15195e-05	6.32111e-05	7.98341e-05	-0.80607	0.187354	Isoleucyl-Isoleucine	PM/AA
C9H9N	M+H	C9H9N+H+	132.081	3-Methylindole	HMDB0000466	1	1	1	2.84247e-05	8.41303e-05	6.37154e-05	8.23898e-05	0.000108791	0.000112622	-0.785346	0.187354	3-Methylindole	PM
C10H13NO4	M+H	C10H13NO4+H+	212.092	3-Methoxytyrosine, Methyldopa, 3-O-Methyl-a-methyldopa	HMDB0001434, HMDB0011754, HMDB0060747	1	1	1	1.49193e-05	4.76238e-05	4.11624e-05	4.39207e-05	5.81897e-05	7.50342e-05	-0.772435	0.187354	3-Methoxytyrosine	PM
C6H9N3O	M+H	C6H9N3O+H+	140.082	Histidinal	HMDB0012234	1	1	1	1.75224e-06	1.61338e-05	1.4306e-05	8.55513e-06	1.74555e-05	2.87889e-05	-0.767461	0.185988	Histidinal	PM
C10H9NO2	M+H	C10H9NO2+H+	176.071	Indoleacetic acid, 5-Hydroxyindoleacetaldehyde	HMDB0000197, HMDB0004073	1	1	1	1.84728e-05	4.12953e-05	3.55033e-05	3.80264e-05	5.20206e-05	7.16285e-05	-0.762986	0.187354	Indoleacetic acid	PM
C3H4N2O	M+H	C3H4N2O+H+	85.0396	Imidazolone	HMDB0004363	1	1	1	0.00114398	0.00109021	0.00141616	0.00305711	0.00129971	0.00172354	-0.736125	0.187354	Imidazolone	PM
C9H7NO2	M+NH4	C9H7NO2+NH4+	179.082	2-Indolecarboxylic acid, 4,6-Dihydroxyquinoline, 3-Formyl-6-hydroxyindole	HMDB0002285, HMDB0004077, HMDB0031172	1	1	1	1.06143e-05	3.82467e-05	3.56897e-05	2.9516e-05	4.65733e-05	6.42739e-05	-0.731275	0.187354	4,6-Dihydroxyquinoline	PM
C15H22N2O3	M+H	C15H22N2O3+H+	279.17	Leucyl-phenylalanine, Isoleucyl-Phenylalanine, Phenylalanyl-Isoleucine, keratan sulfate I	HMDB0013243, HMDB0028914, HMDB0028998, HMDB0062483	1	1	1	1.90625e-06	5.77702e-06	6.29008e-06	5.17281e-06	7.0017e-06	1.08948e-05	-0.723299	0.187354	Leucyl-phenylalanine	PM/AA
C20H35NO2	M+H	C20H35NO2+H+	322.274	Anandamide (18:3,n-6), Anandamide (18:3,n-3)	LMFA08040003, LMFA08040007	1	1	1	0.000183956	9.02589e-05	7.86909e-05	0.000352275	0.00010662	0.000123313	-0.722253	0.17423	Anandamide (18:3,n-3)	FA
C7H12N2O5	M+H	C7H12N2O5+H+	205.082	L-beta-aspartyl-L-alanine, gamma-Glutamylglycine, Alanyl-Aspartic acid, Aspartyl-Alanine, Glutamylglycine	HMDB0011162, HMDB0011667, HMDB0028683, HMDB0028746, HMDB0028819	1	1	1	1.14693e-05	2.59233e-05	1.458e-05	3.27557e-05	3.06702e-05	2.0593e-05	-0.692965	0.187354	Glutamylglycine	PM
C5H10N2O	M+H	C5H10N2O+H+	115.087	3-Amino-2-piperidone, N-Mononitrosopiperazine	HMDB0000323, HMDB0061162	1	1	1	9.56575e-05	0.000367714	0.000334625	0.000153009	0.000440081	0.000696442	-0.692393	0.18019	3-Amino-2-piperidone	PM
C7H8N2O2	M+H	C7H8N2O2+H+	153.066	N1-Methyl-2-pyridone-5-carboxamide, N1-Methyl-4-pyridone-3-carboxamide	HMDB0004193, HMDB0004194	1	1	1	1.12183e-05	4.42837e-05	3.75056e-05	3.91234e-05	5.19517e-05	5.92032e-05	-0.692217	0.187354	N1-Methyl-4-pyridone-3-carboxamide	PM
C8H16O3	M+H	C8H16O3+H+	161.117	3-Hydroxyvalproic acid, 4-Hydroxyvalproic acid, Ethyl (Â±)-3-hydroxyhexanoate, 7-Hydroxyoctanoic acid, Hydroxyoctanoic acid, 3-Hydroxyoctanoic acid, (R)-2-Hydroxycaprylic acid, (R)-3-Hydroxyoctanoic acid, 5-Hydroxyvalproic acid, (+/-)-Ethyl 2-hydroxy-3-methylvalerate, Peroxyoctanoic acid, Ethyl 2-hydroxy-4-methylpentanoate	HMDB0013899, HMDB0013900, HMDB0031509, HMDB0000486, HMDB0000711, HMDB0001954, HMDB0002264, HMDB0010722, HMDB0013898, HMDB0032270, HMDB0032827, HMDB0059867	1	1	1	0.000818787	0.00184167	0.00137954	0.00218864	0.00200753	0.00227528	-0.679733	0.187354	3-hydroxyoctanoic acid	FA
C7H8O	M+NH4	C7H8O+NH4+	126.091	p-Cresol, m-Cresol	HMDB0001858, HMDB0002048	1	1	1	0.000577268	0.0010314	0.00130685	0.00138958	0.0012441	0.0020289	-0.677376	0.187354	p-Cresol	PM
C4H9O7P	M+H	C4H9O7P+H+	201.016	D-Erythrose 4-phosphate	HMDB0001321	1	1	1	3.30009e-05	4.666e-05	4.83676e-05	6.2885e-05	5.68046e-05	8.45211e-05	-0.673595	0.187354	D-Erythrose 4-phosphate	PM
C11H20O3	M+NH4	C11H20O3+NH4+	218.175	4-heptanoyl butyric acid, 8-propionyl caprylic acid, 5R-hydroxy-4R-decanolide, 5S-hydroxy-4R-decanolide, 6-hydroxy-4-Undecanolide, Pelargonyl acetic acid, 3-capryl propionic acid, 9-acetyl pelargonic acid, 3-Hydroxy-2,8-dimethyl-1,7-dioxaspiro[5.5]undecane, 2-hydroxy-10-undecenoic acid, 2S-hydroxy-10-undecenoic acid, (S)-9-Hydroxy-10-undecenoic acid, 2-oxo-undecanoic acid, 3Z-Hexenyl 2R-hydroxy-3…	LMFA01060036, LMFA01060037, LMFA07040022, LMFA07040023, LMFA07040031, LMFA01060034, LMFA01060035, LMFA01060038, LMPK09000029, LMFA01050164, LMFA01050329, LMFA01050436, LMFA01060087, LMFA07010641, LMFA01050328	1	1	1	7.80046e-06	2.59419e-05	2.22561e-05	1.69354e-05	2.90597e-05	4.32588e-05	-0.672529	0.187354	4-heptanoyl butyric acid	FA
C8H13NO4	M+H	C8H13NO4+H+	188.092	2-Keto-6-acetamidocaproate	HMDB0012150	1	1	1	0.000130357	0.000163372	0.000167616	0.000268071	0.000191239	0.000272174	-0.66498	0.187354	2-Keto-6-acetamidocaproate	PM
C12H13NO2	M+NH4	C12H13NO2+NH4+	221.128	3-Indolebutyric acid, 5-(2-Furanyl)-1,2,3,4,5,6-hexahydro-7H-cyclopenta[b]pyridin-7-one	HMDB0002096, HMDB0039656	1	1	1	1.39051e-05	1.62136e-05	1.96565e-05	1.69567e-05	1.89796e-05	4.26973e-05	-0.659717	0.187354	3-Indolebutyric acid	PM
C6H13NO5	M+H	C6H13NO5+H+	180.087	Glucosamine, Fructosamine, beta-D-Glucosamine	HMDB0001514, HMDB0002030, HMDB0030091	1	1	1	0.00159873	0.00154522	0.00157691	0.00320398	0.00185786	0.00234106	-0.649043	0.187354	Glucosamine	PM
C7H8N2O	M+H	C7H8N2O+H+	137.071	N-Methylnicotinamide, 2-Acetyl-3-methylpyrazine	HMDB0003152, HMDB0030001	1	1	1	8.76685e-05	0.000202912	0.000187268	0.000198542	0.000236035	0.000312819	-0.64532	0.187354	2-Methylnicotinamide	PM
C8H5NO2	M+NH4	C8H5NO2+NH4+	165.066	Agrocybin, Indole-5,6-quinone	HMDB0030481, HMDB0006779	1	1	1	1.49789e-05	6.00543e-05	4.67696e-05	4.22357e-05	7.16721e-05	7.59587e-05	-0.640437	0.187354	Indole-5,6-quinone	PM
C7H10O5	M+NH4	C7H10O5+NH4+	192.087	Shikimic acid, 2-Isopropyl-3-oxosuccinate, 3,4,5-trihydroxycyclohex-1-ene-1-carboxylic acid	HMDB0003070, HMDB0012149, HMDB0130150	1	1	1	8.13584e-05	0.000137711	0.000139004	0.000179582	0.00016253	0.000207048	-0.616972	0.187354	Shikimic acid	PM
C6H11NO4	M+H	C6H11NO4+H+	162.076	Aminoadipic acid	LMFA01170098	1	1	1	0.000409931	0.000572427	0.000589495	0.00089928	0.000680329	0.000808113	-0.603168	0.187354	Aminoadipic acid	FA
C6H8N2O	M+H	C6H8N2O+H+	125.071	Methylimidazole acetaldehyde, 2-Methoxy-3-methylpyrazine	HMDB0004181, HMDB0031852	1	1	1	0.000104843	0.000261955	0.000257208	0.000265389	0.000302555	0.000377624	-0.599621	0.187354	Methylimidazole acetaldehyde	PM
C9H11N	M+H	C9H11N+H+	134.096	1,2,3,4-Tetrahydroisoquinoline	HMDB0012489	1	1	1	0.000290354	0.0007287	0.00116388	0.00077534	0.000917147	0.00161472	-0.59935	0.187354	1,2,3,4-Tetrahydroisoquinoline	PM
C9H18NO8P	M+H	C9H18NO8P+H+	300.084	D-4'-Phosphopantothenate	HMDB0001016	1	1	1	1.59994e-06	7.63595e-06	9.42941e-06	3.31655e-06	9.09559e-06	1.58617e-05	-0.599107	0.161489	D-4'-Phosphopantothenate	PM
C9H16O3	M+NH4	C9H16O3+NH4+	190.144	Tetrahydrofurfuryl butyrate, 9-Oxo-nonanoic acid	HMDB0036188, HMDB0094711	1	1	1	0.00568995	0.0142591	0.0123856	0.0154536	0.0153673	0.0174166	-0.577074	0.187354	9-Oxo-nonanoic acid	FA
C10H11NO3	M+H	C10H11NO3+H+	194.081	p-Methylhippuric acid, Phenylacetylglycine, Methyl hippurate, 2-Methylhippuric acid, m-Methylhippuric acid, Methyl n-acetylanthranilate, 4-Hydroxy-5-phenyltetrahydro-1,3-oxazin-2-one, 3-Carbamoyl-2-phenylpropionaldehyde, 4-Anilino-4-oxobutanoic acid	HMDB0013292, HMDB0000821, HMDB0000859, HMDB0011723, HMDB0013245, HMDB0032388, HMDB0060389, HMDB0060366, HMDB0060758	1	1	1	4.38927e-05	8.234e-05	6.46357e-05	6.84095e-05	9.87388e-05	0.000117355	-0.575866	0.187354	Phenylacetylglycine	PM
C8H11N	M+H	C8H11N+H+	122.096	N,N-Dimethylaniline, 1-Phenylethylamine, Phenylethylamine, 5-Ethyl-2-methylpyridine, 2-Propylpyridine, 2,6-Dimethylaniline	HMDB0001020, HMDB0002017, HMDB0012275, HMDB0029729, HMDB0032497, HMDB0060677	1	1	1	0.000246223	0.000512629	0.000380118	0.000341641	0.000560371	0.000790081	-0.571079	0.187354	1-Phenylethylamine	PM
C7H7NO2	M+H	C7H7NO2+H+	138.055	Trigonelline, p-Aminobenzoic acid, 3-Pyridylacetic acid, Methyl nicotinate, 2-Pyridylacetic acid	HMDB0000875, HMDB0001392, HMDB0001538, HMDB0029806, HMDB0060722	1	1	1	0.000282269	0.000505264	0.000353434	0.000506903	0.000633717	0.000547754	-0.565377	0.187354	2-Aminobenzoic acid	PM
C10H15NO3	M+H	C10H15NO3+H+	198.112	Metanephrine, Desglymidodrine	HMDB0004063, HMDB0060558	1	1	1	4.58377e-05	0.000136906	0.000174508	0.000119958	0.000156349	0.000252162	-0.564877	0.187354	Metanephrine	PM
C6H8N2O2	M+H	C6H8N2O2+H+	141.066	1,3-Dimethyluracil, Imidazolepropionic acid, Methylimidazoleacetic acid, Pi-Methylimidazoleacetic acid	HMDB0002144, HMDB0002271, HMDB0002820, HMDB0004988	1	1	1	2.19105e-05	7.53458e-05	4.56837e-05	5.18861e-05	8.50898e-05	7.42212e-05	-0.563181	0.187354	Methylimidazoleacetic acid	PM
C4H6N2O2	M+H	C4H6N2O2+H+	115.05	Dihydrouracil, N-Methylhydantoin	HMDB0000076, HMDB0003646	1	1	1	4.01356e-05	6.07748e-05	6.10215e-05	8.96367e-05	6.83302e-05	8.1053e-05	-0.561744	0.187354	Dihydrouracil	PM
C12H23NO4	M+NH4	C12H23NO4+NH4+	263.197	2-Methylbutyroylcarnitine, Isovalerylcarnitine, Valerylcarnitine, Pivaloylcarnitine	HMDB0000378, HMDB0000688, HMDB0013128, HMDB0041993	1	1	1	1.60239e-06	8.58614e-06	5.09621e-06	6.26828e-06	7.96567e-06	8.2272e-06	-0.55534	0.187354	2-Methylbutyroylcarnitine	FA
C10H11NO	M+H	C10H11NO+H+	162.091	Tryptophanol, (R)-Boschniakine	HMDB0003447, HMDB0030267	1	1	1	4.31154e-05	8.48635e-05	0.00010391	7.59729e-05	9.89805e-05	0.000163319	-0.544751	0.187354	Tryptophanol	PM
C7H13NO4	M+H	C7H13NO4+H+	176.092	N-Carboxyethyl-g-aminobutyric acid	HMDB0002201	1	1	1	3.62595e-05	6.68805e-05	7.85367e-05	7.25748e-05	7.20123e-05	0.000119675	-0.540598	0.187354	N-Carboxyethyl-g-aminobutyric acid	PM
C9H17NO4	M+H	C9H17NO4+H+	204.123	L-Acetylcarnitine	HMDB0000201	1	1	1	7.9918e-05	8.85853e-05	7.26989e-05	0.000143026	9.29163e-05	0.000113604	-0.535243	0.187354	L-Acetylcarnitine	FA
C8H15NO3	M+H	C8H15NO3+H+	174.112	Hexanoylglycine, Isovalerylalanine, Isovalerylsarcosine, N-Acetylleucine	HMDB0000701, HMDB0000747, HMDB0002087, HMDB0011756	1	1	1	6.25014e-05	7.80611e-05	7.16002e-05	0.000110916	8.2953e-05	0.000113212	-0.533447	0.187354	N-Acetylleucine	PM
C9H13NO	M+H	C9H13NO+H+	152.107	Phenylpropanolamine, N-Methylphenylethanolamine, N-Methyltyramine, 1,2,3,4,5,6-Hexahydro-5-methyl-7H-cyclopenta[b]pyridin-7-one, 4-Hydroxyamphetamine	HMDB0001942, HMDB0001387, HMDB0003633, HMDB0039658, HMDB0060765	1	1	1	7.88954e-05	0.000102582	0.000116381	0.000110373	0.000121102	0.000198442	-0.529433	0.187354	N-Methyltyramine	PM
C7H14O3	M+H	C7H14O3+H+	147.102	3-Hydroxyisoheptanoic acid, (+/-)-Ethyl 2-hydroxy-2-methylbutyrate, Methyl DL-Leucate, Ethyl 2-hydroxyisovalerate	HMDB0002207, HMDB0032269, HMDB0036231, HMDB0059842	1	1	1	0.000201422	0.000392888	0.000254265	0.000406873	0.000384708	0.00042077	-0.514693	0.187354	3-Hydroxyisoheptanoic acid	FA
C9H13NO2	M+H	C9H13NO2+H+	168.102	3-Methoxytyramine, p-Synephrine, 4-Methoxytyramine, 4-(beta-Methylaminoethyl)catechol, 4-Hydroxynorephedrine, a-Methyldopamine	HMDB0000022, HMDB0004826, HMDB0012162, HMDB0032020, HMDB0060592, HMDB0060807	1	1	1	0.000108803	0.000336481	0.000316043	0.000256934	0.000396438	0.000429973	-0.508904	0.187354	3-Methoxytyramine	PM
C11H11NO2	M+H	C11H11NO2+H+	190.086	Indole-3-propionic acid, Indole-3-methyl acetate	HMDB0002302, HMDB0029738	1	1	1	1.13181e-05	2.2406e-05	2.35621e-05	2.11441e-05	2.64261e-05	3.35043e-05	-0.501058	0.187354	Indole-3-propionic acid	PM
C11H19NO4	M+H	C11H19NO4+H+	230.139	Butenylcarnitine	HMDB0013126	1	1	1	1.14132e-05	2.81022e-05	2.83536e-05	3.25027e-05	2.87008e-05	3.38823e-05	-0.486477	0.187354	Butenylcarnitine	FA
C11H21NO5	M+H	C11H21NO5+H+	248.149	Hydroxybutyrylcarnitine, (R)-3-hydroxybutyrylcarnitine	HMDB0013127, HMDB0062735	1	1	1	1.68637e-05	3.72038e-05	3.00781e-05	3.16179e-05	4.23509e-05	4.3499e-05	-0.481303	0.187354	Hydroxybutyrylcarnitine	FA
C7H7NO3	M+H	C7H7NO3+H+	154.05	Mesalazine, 3-Hydroxyanthranilic acid	HMDB0014389, HMDB0001476	1	1	1	6.92692e-06	1.66899e-05	1.68544e-05	1.83877e-05	2.04189e-05	1.75296e-05	-0.477169	0.187354	3-Hydroxyanthranilic acid	PM
C5H6N2O	M+H	C5H6N2O+H+	111.055	Imidazole-4-acetaldehyde, 3-Hydroxy-4-aminopyridine	HMDB0003905, HMDB0060741	1	1	1	6.64035e-05	0.000181197	0.000142561	0.000154213	0.00020717	0.000180882	-0.474927	0.187354	Imidazole-4-acetaldehyde	PM
C9H9NO3	M+H	C9H9NO3+H+	180.066	Hippuric acid, 1-(4-Methoxyphenyl)-2-nitroethylene, 3-Succinoylpyridine, Adrenochrome, Methyl n-formylanthranilate	HMDB0000714, HMDB0032595, HMDB0000992, HMDB0012884, HMDB0032398	1	1	1	1.15205e-05	2.74745e-05	3.31196e-05	2.02148e-05	3.28822e-05	4.64917e-05	-0.465691	0.18019	Adrenochrome	PM
C11H17NO2	M+H	C11H17NO2+H+	196.133	2-hydroxymexiletine, p-hydroxymexiletine	HMDB0060953, HMDB0060954	1	1	1	1.79113e-05	6.26742e-05	5.53586e-05	4.00255e-05	7.21175e-05	7.53713e-05	-0.463987	0.18019	2-hydroxymexiletine	PM
C8H14O3	M+NH4	C8H14O3+NH4+	176.128	6-Ethyl-1-methyl-2,7,8-trioxabicyclo[3.2.1]octane, cis-4-Hydroxycyclohexylacetic acid, trans-4-Hydroxycyclohexylacetic acid, Alpha-Ketooctanoic acid, 3-Oxooctanoic acid, Tetrahydrofurfuryl propionate, Ethyl 3-oxohexanoate, 1-Methyl-2-oxopropyl butyrate, 2-n-Propyl-4-oxopentanoic acid, 3-Oxovalproic acid	HMDB0030303, HMDB0000451, HMDB0000909, HMDB0013211, HMDB0010721, HMDB0031177, HMDB0031307, HMDB0036230, HMDB0060683, HMDB0060685	1	1	1	0.000262404	0.000384229	0.000390979	0.000604823	0.000394141	0.000430015	-0.461718	0.187354	trans-4-Hydroxycyclohexylacetic acid	PM
C7H15NO3	M+H	C7H15NO3+H+	162.112	L-Carnitine	HMDB0000062	1	1	1	6.07523e-05	8.78077e-05	0.000104134	8.15352e-05	8.87838e-05	0.000175485	-0.452563	0.18019	L-Carnitine	FA
C6H11NO3	M+H	C6H11NO3+H+	146.081	Isobutyrylglycine, N-Butyrylglycine, Allysine, 4-Acetamidobutanoic acid, (S)-5-Amino-3-oxohexanoate, 2-Keto-6-aminocaproate, L-trans-5-Hydroxy-2-piperidinecarboxylic acid, N-(2-Carboxymethyl)-morpholine	HMDB0000730, HMDB0000808, HMDB0001263, HMDB0003681, HMDB0012131, HMDB0012151, HMDB0029426, HMDB0061156	1	1	1	8.92531e-05	0.000249691	0.000239118	0.000195562	0.000249121	0.000342907	-0.446218	0.187354	4-Acetamidobutanoic acid	PM
C13H18N2O3	M+H	C13H18N2O3+H+	251.139	Paucine, 3-Hydroxymelatonin, (2E)-N-(4-aminobutyl)-3-(3,4-dihydroxyphenyl)prop-2-enimidic acid, N-(4-aminobutyl)-3-(4-hydroxyphenyl)oxirane-2-carboximidic acid, N-(4-aminobutyl)-3-(3,4-dihydroxyphenyl)prop-2-enimidic acid, (2E)-N-(3-aminopropyl)-3-(4-hydroxy-3-methoxyphenyl)prop-2-enimidic acid	HMDB0029876, HMDB0060742, HMDB0139529, HMDB0139530, HMDB0139613, HMDB0139973	1	1	1	1.15546e-06	5.81362e-06	8.10714e-06	2.42116e-06	5.70148e-06	1.23241e-05	-0.439593	0.119742	3-Hydroxymelatonin	PM
C5H12O7P2	M+H	C5H12O7P2+H+	247.013	Dimethylallylpyrophosphate, Isopentenyl pyrophosphate	HMDB0001120, HMDB0001347	1	1	1	2.2348e-05	2.32915e-05	1.68464e-05	2.79406e-05	2.78684e-05	2.88004e-05	-0.43729	0.187354	Dimethylallyl pyrophosphate	PR
C11H11NO3	M+H	C11H11NO3+H+	206.081	5-Methoxyindoleacetate, Indolelactic acid, Cinnamoylglycine, Edulitine	HMDB0004096, HMDB0000671, HMDB0011621, HMDB0030179	1	1	1	4.71634e-06	5.32983e-06	6.98576e-06	5.67434e-06	6.66004e-06	1.03589e-05	-0.414024	0.187354	5-Methoxyindoleacetate	PM
C6H13NO3	M+H	C6H13NO3+H+	148.097	(2R,3R,4R)-2-Amino-4-hydroxy-3-methylpentanoic acid, N-(2-Hydroxyethyl)-morpholine N-oxide, 2-amino-6-hydroxyhexanoic acid	HMDB0029449, HMDB0061157, HMDB0142963	1	1	1	1.34164e-05	1.32738e-05	1.25847e-05	2.10211e-05	1.17969e-05	1.92335e-05	-0.406335	0.187354	N-(2-Hydroxyethyl)-morpholine N-oxide	PM
C6H7N	M+H	C6H7N+H+	94.0651	Aniline	HMDB0003012	1	1	1	0.00385615	0.00528696	0.00463289	0.00435446	0.00597056	0.00786689	-0.401139	0.187354	Aniline	PM
C9H13NO3	M+H	C9H13NO3+H+	184.097	Epinephrine, Normetanephrine, Methylnoradrenaline, Ginkgotoxin	HMDB0000068, HMDB0000819, HMDB0002832, HMDB0029455	1	1	1	4.50888e-05	7.67811e-05	9.64238e-05	7.36957e-05	8.90909e-05	0.000125285	-0.400156	0.187354	Epinephrine	PM
C23H38O4	M+H	C23H38O4+H+	379.284	2-Arachidonylglycerol, MG(0:0/20:4(8Z,11Z,14Z,17Z)/0:0), MG(20:4(5Z,8Z,11Z,14Z)/0:0/0:0), MG(20:4(8Z,11Z,14Z,17Z)/0:0/0:0), 1-Acetoxy-2-hydroxy-5,12,15-heneicosatrien-4-one, Persenone A	HMDB0004666, HMDB0011549, HMDB0011578, HMDB0011579, HMDB0035273, HMDB0036568	1	1	1	1.82851e-05	8.05518e-06	5.19923e-06	2.39703e-05	7.87889e-06	9.57148e-06	-0.393191	0.120824	2-Arachidonylglycerol	GL
C4H9NO3	M+H	C4H9NO3+H+	120.066	L-Homoserine, L-Allothreonine, Hydroxyethyl glycine	HMDB0000719, HMDB0004041, HMDB0061148	1	1	1	0.000126632	0.000168466	0.000151891	0.000212064	0.000175446	0.000196263	-0.385167	0.187354	L-Homoserine	PM
C6H14O3	M+H	C6H14O3+H+	135.102	Polypropylene glycol (m w 1,200-3,000)	HMDB0032478	1	1	1	0.0251922	0.0357052	0.0154212	0.0258358	0.0402759	0.0333946	-0.382753	0.187354	Polypropylene glycol (m w 1,200-3,000)	PM
C9H11NO3	M+H	C9H11NO3+H+	182.081	L-Tyrosine, 4-Hydroxy-4-(3-pyridyl)-butanoic acid, L-Threo-3-Phenylserine, Beta-Tyrosine, o-Tyrosine	HMDB0000158, HMDB0001119, HMDB0002184, HMDB0003831, HMDB0006050	1	1	1	8.15498e-05	0.000156268	0.000159421	0.000107681	0.00017603	0.000232992	-0.379325	0.18019	L-Tyrosine	PM/AA
C5H5NO2	M+H	C5H5NO2+H+	112.039	Pyrrole-2-carboxylic acid	HMDB0004230	1	1	1	7.03722e-05	0.00014444	0.000119646	0.000129599	0.000179397	0.000121984	-0.365792	0.187354	Pyrrole-2-carboxylic acid	PM
C8H10O3	M+NH4	C8H10O3+NH4+	172.097	Sylvopinol, 4-Hydroxy-3-methoxybenzenemethanol, 5-ethylbenzene-1,2,3-triol, 2,4-dimethylbenzene-1,3,5-triol, 5-methoxy-4-methylbenzene-1,3-diol, 5-methoxy-2-methylbenzene-1,3-diol, 2,3-dimethoxyphenol, 1-(4-hydroxyphenyl)ethane-1,2-diol	HMDB0030570, HMDB0032012, HMDB0125534, HMDB0126617, HMDB0131231, HMDB0131232, HMDB0131479, HMDB0135785	1	1	1	7.73859e-05	0.000102049	0.000129256	0.000111935	0.000112523	0.000172187	-0.361686	0.187354	4-Hydroxy-3-methoxybenzenemethanol (Vanillyl alcohol)	PM
C6H12O2	M+H	C6H12O2+H+	117.091	(Â±)-2-Methylpentanoic acid, Caproic acid, Isocaproic acid, Methyl (S)-2-Methylbutanoate, Methyl 3-methylbutanoate, Isopropyl propionate, Propyl propionate, Methyl pentanoate, 2-Ethylbutanoic acid, 2-Methylpropyl acetate, Ethyl 2-methylpropanoate, n-Butyl acetate, Diacetone alcohol, 3-Methylpentanoic acid, Ethyl butyrate	HMDB0031580, HMDB0000535, HMDB0000689, HMDB0029762, HMDB0030027, HMDB0030056, HMDB0030059, HMDB0031207, HMDB0031221, HMDB0031246, HMDB0031248, HMDB0031325, HMDB0031511, HMDB0033774, HMDB0033889	1	1	1	0.0508591	0.0498027	0.0250349	0.0655681	0.0528784	0.0429726	-0.360866	0.187354	Caproic acid	FA
C11H13NO3	M+H	C11H13NO3+H+	208.097	N-Acetyl-L-phenylalanine, 3-Phenylpropionylglycine, Phenylpropionylglycine, N-isopropylterephthalamic acid	HMDB0000512, HMDB0002042, HMDB0000860, HMDB0060608	1	1	1	1.61405e-05	2.84481e-05	3.70283e-05	2.31718e-05	3.30047e-05	4.71634e-05	-0.340457	0.164256	N-Acetyl-L-phenylalanine	PM
C6H6N2O	M+H	C6H6N2O+H+	123.055	Niacinamide, 2-Acetylpyrazine	HMDB0001406, HMDB0031861	1	1	1	0.000434191	0.00202445	0.00098456	0.000592171	0.00236557	0.00139492	-0.338149	0.108106	Niacinamide	PM
C5H10O5	M+H	C5H10O5+H+	151.06	L-Threo-2-pentulose, D-Xylulose, D-Xylose, D-Ribose, 2-Deoxyribonic acid, D-Ribulose, L-Arabinose, L-Ribulose, Beta-D-ribopyranose, Arabinofuranose, D-Apiose, D-Arabinose, 3-hydroxy-2,2-bis(hydroxymethyl)propanoic acid	HMDB0000751, HMDB0001644, HMDB0000098, HMDB0000283, HMDB0000366, HMDB0000621, HMDB0000646, HMDB0003371, HMDB0012194, HMDB0012325, HMDB0029941, HMDB0029942, HMDB0127617	1	1	1	5.38739e-06	4.22427e-06	7.36592e-06	1.15464e-05	5.56352e-06	4.13802e-06	-0.323694	0.125289	D-Ribose	PM
C22H32O2	M+H	C22H32O2+H+	329.248	Docosahexaenoic acid, Neogrifolin, Grifolin, Retinol acetate	HMDB0002183, HMDB0030053, HMDB0030446, HMDB0035185	1	1	1	0.000416648	0.000111237	6.69127e-05	0.000550865	0.000124577	6.36221e-05	-0.313301	0.0594699	Docosahexaenoic acid	FA
C9H16O4	M+NH4	C9H16O4+NH4+	206.139	Nonate, (+/-)-Ethyl 3-acetoxy-2-methylbutyrate, Azelaic acid, cis- and trans-Ethyl 2,4-dimethyl-1,3-dioxolane-2-acetate, (+/-)-Methyl 5-acetoxyhexanoate, 2,4-Dimethylpimelic acid, 3-Methylsuberic acid, Diethyl methylsuccinate, Diethyl glutarate	HMDB0011717, HMDB0032258, HMDB0000784, HMDB0032200, HMDB0032387, HMDB0059760, HMDB0059783, HMDB0059814, HMDB0059879	1	1	1	0.000125991	0.000155964	0.000166891	0.000187437	0.000164165	0.000193915	-0.281402	0.187354	Azelaic acid	FA
C11H9NO2	M+H	C11H9NO2+H+	188.071	Indoleacrylic acid	HMDB0000734	1	1	1	6.60671e-06	3.89095e-05	3.65702e-05	1.8623e-05	4.29729e-05	3.81167e-05	-0.280632	0.108785	Indoleacrylic acid	PM
C8H11NO	M+H	C8H11NO+H+	138.091	2-Hydroxyphenethylamine, Tyramine, Dimethylaniline-N-oxide, m-Tyramine, 2-Acetyl-1-ethylpyrrole, 4-Hydroxy-2,6-dimethylaniline	HMDB0001065, HMDB0000306, HMDB0001466, HMDB0004989, HMDB0029759, HMDB0060681	1	1	1	0.000381878	0.000678512	0.000655462	0.000524056	0.000705997	0.000845705	-0.274713	0.18019	Tyramine	PM
C10H11NO2	M+H	C10H11NO2+H+	178.086	5-Hydroxytryptophol, 1,2-Dehydrosalsolinol	HMDB0001855, HMDB0012490	1	1	1	6.04298e-05	8.18358e-05	9.96869e-05	7.63058e-05	9.11864e-05	0.000122163	-0.259613	0.18019	5-Hydroxytryptophol	PM
C4H9NO	M+H	C4H9NO+H+	88.0757	Morpholine, 4-Aminobutyraldehyde, N-Ethylacetamide, 2-(dimethylamino)acetaldehyde	HMDB0031581, HMDB0001080, HMDB0031215, HMDB0142479	1	1	1	0.00654906	0.00690173	0.00618513	0.00777502	0.00721579	0.00845098	-0.255589	0.187354	4-Aminobutyraldehyde	PM
C6H9NO2	M+H	C6H9NO2+H+	128.071	(Â±)-4-Methylene-2-pyrrolidinecarboxylic acid, D-1-Piperideine-2-carboxylic acid, (S)-2,3,4,5-Tetrahydropiperidine-2-carboxylate	HMDB0029434, HMDB0001084, HMDB0012130	1	1	1	0.000901832	0.00293945	0.00487837	0.00179987	0.00332785	0.00495939	-0.210169	0.0718116	D-1-Piperideine-2-carboxylic acid	PM
C7H11NO3	M+H	C7H11NO3+H+	158.081	3-Methylcrotonylglycine, Tiglylglycine	HMDB0000459, HMDB0000959	1	1	1	0.000156783	0.000355934	0.000553572	0.0002666	0.000390114	0.000554376	-0.183708	0.0765229	N-Acetylproline	PM
C6H10O5	M+H	C6H10O5+H+	163.06	2-Hydroxyadipic acid, 3-Hydroxyadipic acid, 3-Hydroxymethylglutaric acid, 2(R)-Hydroxyadipic acid, Levoglucosan, 2-Hydroxy-2-ethylsuccinic acid, D-1-Deoxy-erythro-hexo-2,3-diulose	HMDB0000321, HMDB0000345, HMDB0000355, HMDB0000368, HMDB0000640, HMDB0059758, HMDB0029934	1	1	1	0.00119951	0.000722226	0.000981324	0.00157938	0.000808578	0.000810375	-0.139746	0.0761412	2-Hydroxyadipic acid	FA
C9H9NO2	M+H	C9H9NO2+H+	164.071	4-(3-Pyridyl)-3-butenoic acid, 3-Methyldioxyindole	HMDB0001424, HMDB0004186	1	1	1	0.000125636	0.000387275	0.000410187	0.000169601	0.000428303	0.000418886	-0.139466	0.0594699	3-Methyldioxyindole	PM
C9H10O2	M+Na	C9H10O2+Na+	173.057	4-Coumaryl alcohol, 2'-Hydroxy-5'-methylacetophenone, Hydrocinnamic acid, 3-Methylphenylacetic acid, 3,4-Dimethylbenzoic acid, 2-Phenylpropionate, 2-Methoxy-4-vinylphenol, Benzyl acetate, o-Tolyl acetate, p-Tolyl acetate, 2'-Methoxyacetophenone, 4'-Methoxyacetophenone, Methyl phenylacetate, 3-ethenyl-5-methoxyphenol, 3-(2-hydroxyphenyl)propanal, 2-(3-hydroxyprop-1-en-1-yl)phenol, 4-(prop-2-en-1-y…	HMDB0003654, HMDB0032592, HMDB0000764, HMDB0002222, HMDB0002237, HMDB0011743, HMDB0013744, HMDB0031310, HMDB0032073, HMDB0032075, HMDB0032569, HMDB0032570, HMDB0032617, HMDB0125532, HMDB0134026, HMDB0134027, HMDB0135239, HMDB0135276, HMDB0135277, HMDB0135278, HMDB0135279, HMDB0135280, HMDB0135281, HMDB0135644	1	1	1	0.00162456	0.00190424	0.00190353	0.00184469	0.00198951	0.00196308	-0.0938028	0.187354	Methyl phenylacetate	PM
C10H12O6	M+H	C10H12O6+H+	229.071	3-(2,3,4-trihydroxy-5-methoxyphenyl)propanoic acid, 3-(2,4,5-trihydroxy-3-methoxyphenyl)propanoic acid, 2-(2,3,6-trihydroxy-4-methoxyphenyl)propanoic acid, 6-hydroxy-2,3,4-trimethoxybenzoic acid, 2-(2,3,5-trihydroxy-4-methoxyphenyl)propanoic acid, 2-hydroxy-3,4,5-trimethoxybenzoic acid	HMDB0125592, HMDB0125596, HMDB0125049, HMDB0142089, HMDB0125034, HMDB0141334	1	1	1	6.11905e-05	4.87594e-05	9.92413e-05	0.000130635	5.03072e-05	3.97495e-05	-0.0772134	0.028814	Carlosic acid	PM
C20H30O	M+H	C20H30O+H+	287.237	Vitamin A, 11-cis-Retinol, 9-cis-Retinol, 13-cis Retinol, (x)-p-Menth-1-en-4-yl 5-isopropyl-2-methylphenyl ether, Abietinal, ent-16-Kauren-19-al, ent-19-Trachylobanal, 8,13-Abietadien-18-al	HMDB0000305, HMDB0006216, HMDB0006217, HMDB0006221, HMDB0030403, HMDB0034735, HMDB0036728, HMDB0036841, HMDB0038709	1	1	1	0.000162171	5.02446e-05	3.67944e-05	0.000175664	5.39793e-05	3.20321e-05	-0.0704159	0.0189458	Vitamin A	PR
C20H32O2	M+H	C20H32O2+H+	305.248	Arachidonic acid, Cis-8,11,14,17-Eicosatetraenoic acid, Mesterolone, Sideridiol, ent-17-Hydroxy-16beta-kauran-19-al, Yucalexin P21, Copalic acid, Junicedral, 7,13-Eperudien-15-oic acid, Oryzalexin S, Oryzalexin E	HMDB0001043, HMDB0002177, HMDB0006036, HMDB0036702, HMDB0036721, HMDB0036754, HMDB0036829, HMDB0036830, HMDB0037824, HMDB0039687, HMDB0039702	1	1	1	0.0009963	0.000279789	0.00018103	0.00107561	0.000286332	0.00014428	-0.0478154	0.0118512	Arachidonic acid	FA
C11H19N3O6S	M+H	C11H19N3O6S+H+	322.107	L-L-Homoglutathione	HMDB0029395	1	1	1	2.93511e-05	1.97111e-05	1.78094e-05	2.10399e-05	2.64423e-05	2.04913e-05	-0.0235801	0.0235749	L-L-Homoglutathione	PM
C22H36O2	M+H	C22H36O2+H+	333.279	Adrenic acid, 1-Hydroxy-1-phenyl-3-hexadecanone, 3-Hydroxy-1-phenyl-1-hexadecanone, Ethyl Arachidonate	HMDB0002226, HMDB0035676, HMDB0035677, HMDB0062725	1	1	1	8.92944e-05	7.05134e-06	4.22932e-06	9.03794e-05	7.92896e-06	1.91813e-06	0.00500919	0.000949412	Adrenic acid	FA
C6H8O4	M+H	C6H8O4+H+	145.05	3-hexenedioic acid, Ethyl hydrogen fumarate, 3E-methylglutaconic acid, (E)-hex-2-enedioic acid, 2E-methyl-glutaconic acid, 2-methylideneglutaric acid	LMFA01170087, LMFA07010876, LMFA01170068, LMFA01170070, LMFA01170079, LMFA01020394	1	1	1	0.00973384	0.00823031	0.0135829	0.0143625	0.00891538	0.00719654	0.0499065	0.0323745	3-Hexenedioic acid	FA
C12H14O7	M+H	C12H14O7+H+	271.081	Phenylglucuronide, Phenol glucuronide, 3,4,5-trihydroxy-6-phenoxyoxane-2-carboxylic acid	HMDB0059806, HMDB0060014, HMDB0135168	1	1	1	2.88432e-05	1.47269e-05	2.8909e-05	4.26665e-05	1.44539e-05	1.0544e-05	0.0991666	0.0323745	Phenol glucuronide	PM
C27H46O	M-H2O+H	C27H44-H2O+H+	369.352	Cholesterol	LMST01010001	1	1	1	0.00286802	0.00197907	0.00155961	0.00240701	0.00198378	0.00142072	0.140667	0.0994237	Cholesterol	ST
C10H10O5	M+H	C10H10O5+H+	211.06	Vanilpyruvic acid, 3-(4-hydroxy-3-methoxyphenyl)oxirane-2-carboxylic acid, (2E)-3-(2,4-dihydroxy-3-methoxyphenyl)prop-2-enoic acid, (2E)-3-(2,4-dihydroxy-5-methoxyphenyl)prop-2-enoic acid, 3-(3,4-dihydroxy-5-methoxyphenyl)prop-2-enoic acid, 3-(2,4-dihydroxy-5-methoxyphenyl)prop-2-enoic acid, 3-(2,4-dihydroxy-3-methoxyphenyl)prop-2-enoic acid, 3-(2,3-dihydroxy-4-methoxyphenyl)prop-2-enoic acid, 3-…	HMDB0011714, HMDB0125516, HMDB0125515, HMDB0125514, HMDB0127490, HMDB0127946, HMDB0127947, HMDB0132221, HMDB0132228, HMDB0140909, HMDB0141258, HMDB0141331, HMDB0142176, HMDB0142177, HMDB0142178, HMDB0142180, HMDB0142181	1	1	1	1.61566e-05	1.2774e-05	3.8611e-05	3.63331e-05	1.27648e-05	1.09643e-05	0.169318	0.0522118	Vanilpyruvic acid	PM
C4H5NS	M+H	C4H5NS+H+	100.022	Allyl isothiocyanate, 3-Thiocyanato-1-propene	HMDB0005843, HMDB0029755	1	1	1	4.20949e-05	8.41445e-05	0.00018304	7.03836e-05	9.95074e-05	9.83621e-05	0.205318	0.0718116	Allyl isothiocyanate	FA
C10H9N5O	M+H	C10H9N5O+H+	216.088	Kinetin	HMDB0012245	1	1	1	9.1457e-06	1.03425e-05	1.64303e-05	3.89952e-06	1.19326e-05	1.40998e-05	0.263042	0.120824	Kinetin	PM
C21H42NO8P	M+NH4	C21H42NO8P+NH4+	485.299	PE(8:0/8:0)	LMGP02010102	1	1	1	7.91128e-06	8.05724e-06	8.29965e-06	9.41739e-06	8.34574e-06	2.45397e-06	0.263489	0.127454	PE(16:0)	GP
C10H19NO4	M+H	C10H19NO4+H+	218.139	Propionylcarnitine, O-propanoyl-carnitine	HMDB0000824, HMDB0062514	1	1	1	4.65592e-05	0.000128794	0.000221392	6.58892e-05	0.000128335	0.000135933	0.265058	0.0930047	Propionylcarnitine	FA
C4H5N3O	M+H	C4H5N3O+H+	112.051	Cytosine	HMDB0000630	1	1	1	5.23017e-05	3.53428e-05	3.69327e-05	3.02583e-05	4.04832e-05	3.21915e-05	0.275335	0.187354	Cytosine	PM
C8H6O3	M+H	C8H6O3+H+	151.039	Phenylglyoxylic acid, (E)-8-Hydroxy-2-octene-4,6-diynoic acid, 4-Hydroxyphthalide	HMDB0001587, HMDB0031515, HMDB0032598	1	1	1	2.23575e-05	3.01579e-05	4.83138e-05	2.8972e-05	2.93171e-05	2.44887e-05	0.284596	0.161489	Phenylglyoxylic acid	PM
C5H6O4	M+H	C5H6O4+H+	131.034	Mesaconic acid, Itaconic acid, Glutaconic acid, Citraconic acid, Gamma-delta-Dioxovaleric acid, Methyl hydrogen fumarate	HMDB0000749, HMDB0002092, HMDB0000620, HMDB0000634, HMDB0013233, HMDB0033809	1	1	1	3.04524e-05	2.61324e-05	3.91269e-05	3.46321e-05	2.64338e-05	1.74267e-05	0.286138	0.18019	Itaconic acid, Glutaconic acid	FA
C11H17NO6	M+H	C11H17NO6+H+	260.113	Fumarycarnitine, Osmaronin	HMDB0013134, HMDB0032769	1	1	1	4.40805e-06	5.74364e-06	1.22488e-05	6.15351e-06	6.31081e-06	5.69739e-06	0.302629	0.120824	Fumarycarnitine	FA
C11H10O4	M+H	C11H10O4+H+	207.065	Isoeugenitol, Eugenitol, Vinyl caffeate, 1-(6-hydroxy-4-methoxy-1-benzofuran-5-yl)ethan-1-one, 6-(hydroxymethyl)-7-methoxy-2H-chromen-2-one	HMDB0029472, HMDB0029466, HMDB0029775, HMDB0129368, HMDB0136784	1	1	1	1.68134e-05	2.16697e-05	3.821e-05	1.95529e-05	2.31034e-05	1.85885e-05	0.324509	0.161489	Eugenitol	PM
C9H18N2O4	M+H	C9H18N2O4+H+	219.134	Isoleucyl-Serine, Leucyl-Serine, Serylisoleucine, Serylleucine, Threoninyl-Valine, Valyl-Threonine	HMDB0028916, HMDB0028938, HMDB0029042, HMDB0029043, HMDB0029074, HMDB0029137	1	1	1	8.59578e-05	0.000220764	0.000330167	0.000134784	0.000201619	0.000167199	0.33876	0.127454	Leucyl-Serine	PM/AA
C9H10O5	M+H	C9H10O5+H+	199.06	Vanillylmandelic acid, 3-(3,4-Dihydroxyphenyl)lactic acid, 3-(3,4,5-trihydroxyphenyl)propanoic acid, 2-(2,5-dihydroxy-4-methoxyphenyl)acetic acid, 2-(2,3,4-trihydroxyphenyl)propanoic acid, 2-hydroxy-3,4-dimethoxybenzoic acid, 4-hydroxy-2,3-dimethoxybenzoic acid, 2-(2,4,5-trihydroxyphenyl)propanoic acid, 3-(2,4-dihydroxyphenyl)-3-hydroxypropanoic acid, 3-(2,4,5-trihydroxyphenyl)propanoic acid, 2-(…	HMDB0000291, HMDB0003503, HMDB0125529, HMDB0130476, HMDB0137823, HMDB0142084, HMDB0142087, HMDB0125024, HMDB0126478, HMDB0126489, HMDB0131426, HMDB0133489, HMDB0137136, HMDB0140947	1	1	1	1.74089e-05	1.26567e-05	4.27351e-05	3.298e-05	1.21942e-05	1.225e-05	0.342294	0.108106	Vanillylmandelic acid	PM
C3H4O3	M+H	C3H4O3+H+	89.0233	Pyruvic acid	LMFA01060077	1	1	1	3.86989e-05	2.93883e-05	3.92303e-05	4.15861e-05	3.10255e-05	1.17841e-05	0.346643	0.164256	Pyruvic acid	FA
C10H8O4	M+H	C10H8O4+H+	193.05	8-Hydroxy-7-methoxy-2H-1-benzopyran-2-one, 7-hydroxy-3-(hydroxymethyl)-1H-isochromen-1-one, 6-hydroxy-3-(hydroxymethyl)-1H-isochromen-1-one, 5-hydroxy-3-(hydroxymethyl)-1H-isochromen-1-one, 4-methoxy-1-benzofuran-5-carboxylic acid, 6-hydroxy-7-methoxy-2H-chromen-2-one, 5,7-dihydroxy-4-methyl-2H-chromen-2-one, 5-hydroxy-7-methoxy-2H-chromen-2-one, 7-hydroxy-5-methoxy-2H-chromen-2-one, 6,7-dihydrox…	HMDB0030692, HMDB0128620, HMDB0128621, HMDB0128622, HMDB0129374, HMDB0132246, HMDB0136758, HMDB0136674, HMDB0136675, HMDB0136755, HMDB0136756, HMDB0136757, HMDB0136775, HMDB0136776	1	1	1	4.28981e-06	7.68673e-06	1.83704e-05	8.74107e-06	7.14751e-06	7.44198e-06	0.379331	0.120824	Scopoletin	PM
C3H6O2	M+H	C3H6O2+H+	75.0441	Propionic acid	LMFA01010003	1	1	1	3.94594e-05	5.1673e-05	1.30558e-05	1.27377e-05	3.62326e-05	2.69913e-05	0.45585	0.157587	Propionic acid	FA
C6H6O4	M+H	C6H6O4+H+	143.034	trans-trans-Muconic acid, Sumiki's acid, cis,cis-Muconic acid, 2,3-Methylenesuccinic acid, benzene-1,2,3,5-tetrol, benzene-1,2,3,4-tetrol	HMDB0002349, HMDB0002432, HMDB0006331, HMDB0059762, HMDB0125218, HMDB0134002	1	1	1	0.000137198	0.000119288	0.000264011	0.00014793	0.000120319	0.000106889	0.472464	0.18019	2,3-Methylenesuccinic acid	PM
C11H12O5	M+H	C11H12O5+H+	225.076	Elenolide, Sinapic acid, 3-(3-hydroxy-4,5-dimethoxyphenyl)prop-2-enoic acid, 3-(4,5-dihydroxy-2,3-dimethoxyphenyl)prop-2-enal, 3-(6-hydroxy-7-methoxy-2H-1,3-benzodioxol-5-yl)propanal, 3-(7-hydroxy-6-methoxy-2H-1,3-benzodioxol-5-yl)propanal, 6-(3-hydroxyprop-1-en-1-yl)-4-methoxy-2H-1,3-benzodioxol-5-ol, 6-(3-hydroxyprop-1-en-1-yl)-5-methoxy-2H-1,3-benzodioxol-4-ol, 3-(4-hydroxy-3,5-dimethoxyphenyl…	HMDB0030018, HMDB0032616, HMDB0141325, HMDB0128665, HMDB0128667, HMDB0128668, HMDB0128673, HMDB0128674, HMDB0127488, HMDB0128183, HMDB0140920, HMDB0142075, HMDB0142169, HMDB0142170, HMDB0142171, HMDB0142172, HMDB0142173, HMDB0142174	1	1	1	1.38123e-05	1.35076e-05	3.2184e-05	1.6167e-05	1.31561e-05	1.07085e-05	0.571847	0.18019	Sinapic acid	PM
C12H20O6	M+H	C12H20O6+H+	261.133	Glycerol tripropanoate	HMDB0032857	1	1	1	8.41106e-05	4.39465e-05	0.000115703	8.67581e-05	3.99084e-05	2.8194e-05	0.654492	0.187354	Glycerol tripropanoate	PM
C20H37NO2	M+H	C20H37NO2+H+	324.29	Linoleoyl ethanolamide	HMDB0012252	1	1	1	7.94716e-06	6.08106e-06	2.12111e-05	7.79648e-06	6.1022e-06	7.34018e-06	0.730479	0.177919	Linoleoyl ethanolamide	FA
C20H30O2	M+H	C20H30O2+H+	303.232	Eicosapentaenoic acid, Retinyl ester, 8,15-Isopimaradien-18-oic acid, Siderone, Yucalexin B14, Yucalexin A16, 8(17),12-Labdadiene-15,16-dial, Isopimaric acid, Cascarillone, 8,13-Abietadien-18-oic acid, (ent-15beta,16beta)-15,16-Epoxy-3-kauranone, ent-8(17),13(16),14-Labdatrien-18-oic acid	HMDB0001999, HMDB0003598, HMDB0035692, HMDB0036703, HMDB0036709, HMDB0036775, HMDB0036805, HMDB0036811, HMDB0036826, HMDB0038172, HMDB0038687, HMDB0039486	1	1	1	4.35586e-05	7.27177e-06	1.14553e-05	3.12547e-05	3.77547e-06	1.79166e-06	0.758338	0.127454	Eicosapentaenoic acid	FA
C3H8O2	M+H	C3H8O2+H+	77.0597	(S)-Propane-1,2-diol	HMDB0006213	1	1	1	0.000141079	9.01204e-05	0.000331179	0.000126968	9.53596e-05	7.06734e-05	0.940636	0.187354	(S)-Propane-1,2-diol	PM
C16H20O3	M+H	C16H20O3+H+	261.149	10-Hydroxy-3-methoxy-1,3,5,7-cadinatetraen-9-one, 2-(hydroxymethyl)-2-(4-methylpent-3-en-1-yl)-2H-chromen-8-ol, 2-methyl-2-(4-methylpent-3-en-1-yl)-2H-chromene-6,8-diol, 2-methyl-2-(4-methylpent-3-en-1-yl)-2H-chromene-7,8-diol, 2-[2-(3,3-dimethyloxiran-2-yl)ethyl]-2-methyl-2H-chromen-8-ol, 5-methyl-5-(4-methylpent-3-en-1-yl)-3,6-dioxatricyclo[5.4.0.0Â²,â´]undeca-1(7),8,10-trien-8-ol, 2-(2-hydrox…	HMDB0036456, HMDB0134719, HMDB0134722, HMDB0134724, HMDB0134726, HMDB0134728, HMDB0134730, HMDB0134736	1	1	1	2.03113e-06	0	0	3.20013e-07	2.06995e-07	1.29797e-07	1.62875	0.137428	lahorenoic acid A	FA
C18H22NO	M+H	C18H22NO+H+	269.177	N-(p-Hydroxyphenethyl)actinidine	HMDB0030347	1	1	1	4.81136e-06	1.1563e-06	1.06021e-05	1.35566e-06	9.94525e-07	1.80262e-07	2.71109	0.187354	N-(p-Hydroxyphenethyl)actinidine	PM
C27H52O4	M+NH4	C27H52O4+NH4+	458.42	MG(0:0/24:1(15Z)/0:0), MG(24:1(15Z)/0:0/0:0)	HMDB0011559, HMDB0011589	0	1	1	7.14585e-07	1.81274e-06	2.89034e-06	7.88111e-07	2.35543e-06	8.45776e-06	-1.09854	0.164256	MG(24:1)	GL
C13H18N2O	M+H	C13H18N2O+H+	219.149	5-Methoxydimethyltryptamine, N-despropyl ropinirole	HMDB0002004, HMDB0060625	0	1	1	1.72503e-06	2.73526e-06	5.21324e-06	2.59583e-06	3.64567e-06	1.38019e-05	-1.05101	0.17423	5-Methoxydimethyltryptamine	PM
C23H43NO3S	M+NH4	C23H43NO3S+NH4+	431.33	N-oleoyl methionine	LMFA08020110	0	1	1	0	3.60284e-06	4.12212e-06	1.07243e-06	4.16924e-06	1.06994e-05	-1.04515	0.17423	N-oleoyl methionine	FA
C14H22N2O2	M+H	C14H22N2O2+H+	251.175	3-Hydroxylidocaine	HMDB0060655	0	1	1	6.19746e-07	2.37964e-06	5.1707e-06	6.655e-07	2.74769e-06	1.14259e-05	-0.860982	0.130588	3-Hydroxylidocaine	PM
C10H13N3O	M+H	C10H13N3O+H+	192.113	4-Hydroxydebrisoquine, N'-nitrosoanabasine	HMDB0006468, HMDB0041939	0	1	1	6.2899e-07	3.37531e-06	6.77327e-06	2.15357e-06	4.61277e-06	1.19443e-05	-0.795829	0.162439	4-Hydroxydebrisoquine	PM
C11H20N2O4	M+H	C11H20N2O4+H+	245.15	Isoleucyl-Hydroxyproline, Hydroxyprolyl-Isoleucine, Hydroxyprolyl-Leucine, Leucyl-Hydroxyproline	HMDB0028908, HMDB0028866, HMDB0028867, HMDB0028930	0	1	1	1.59645e-06	1.90334e-06	7.72146e-06	1.65485e-06	2.16381e-06	1.5412e-05	-0.777175	0.120824	Isoleucyl-Hydroxyproline	PM/AA
C9H15N3O2	M+H	C9H15N3O2+H+	198.124	L-Histidine trimethylbetaine	HMDB0029422	0	1	1	2.44283e-06	5.78282e-06	4.45491e-06	4.7665e-06	5.42443e-06	1.05007e-05	-0.70643	0.187354	L-Histidine trimethylbetaine	PM
C13H26O5	M+NH4	C13H26O5+NH4+	280.212	Glyceryl 5-hydroxydecanoate	HMDB0032297	0	1	1	7.44413e-07	1.09006e-05	8.28164e-06	2.47399e-06	1.36106e-05	1.35796e-05	-0.57402	0.151355	Glyceryl 5-hydroxydecanoate	PM
C7H11N3O	M+H	C7H11N3O+H+	154.097	N-Acetylhistamine	HMDB0013253	0	1	1	1.03947e-06	4.24096e-06	5.74859e-06	3.00613e-06	4.09844e-06	9.07989e-06	-0.553304	0.161489	N-Acetylhistamine	PM
C10H11NO4	M+H	C10H11NO4+H+	210.076	Hydroxyphenylacetylglycine, 3-Carbamoyl-2-phenylpropionic acid, 2-[(4-methoxyphenyl)formamido]acetic acid, 2-{[hydroxy(2-methoxyphenyl)methylidene]amino}acetic acid, 2-{[hydroxy(3-methoxyphenyl)methylidene]amino}acetic acid	HMDB0000735, HMDB0060367, HMDB0131190, HMDB0126552, HMDB0127991	0	1	1	9.22984e-07	5.05412e-06	5.4987e-06	4.74117e-06	5.48668e-06	6.54066e-06	-0.547159	0.187354	Hydroxyphenylacetylglycine	PM
C15H29NO5	M+H	C15H29NO5+H+	304.212	3-hydroxyoctanoyl carnitine	HMDB0061634	0	1	1	1.12987e-06	5.87917e-06	5.08872e-06	2.39185e-06	6.97804e-06	7.3651e-06	-0.468127	0.161489	3-hydroxyoctanoyl carnitine	FA
C8H12O	M+NH4	C8H12O+NH4+	142.123	6-Methyl-3,5-heptadien-2-one, 2,3-Dimethyl-2-cyclohexen-1-one, (E,E)-2,4-Octadienal, trans,trans-3,5-Octadien-2-one, 1,5-Octadien-3-one	HMDB0031582, HMDB0031414, HMDB0031686, HMDB0032446, HMDB0032447	0	1	1	0.000267253	0.000313653	0.000263481	0.000327525	0.000336824	0.000432664	-0.377604	0.187354	2,4-octadienal	FA
C10H19NO3	M+H	C10H19NO3+H+	202.144	Capryloylglycine, Valproylglycine	HMDB0000832, HMDB0013116	0	1	1	5.99895e-05	0.000111911	7.7864e-05	9.09275e-05	0.000111959	0.000120334	-0.371946	0.187354	Valproylglycine	PM
C6H11NO2	M+H	C6H11NO2+H+	130.086	L-trans-4-Methyl-2-pyrrolidinecarboxylic acid, L-Pipecolic acid, D-Pipecolic acid, Pipecolic acid, N4-Acetylaminobutanal, 2-Pyrrolidineacetic acid	HMDB0029435, HMDB0000716, HMDB0005960, HMDB0000070, HMDB0004226, HMDB0029444	0	1	1	0.000440374	0.000730087	0.000847657	0.000365085	0.00075893	0.0013812	-0.311924	0.117952	Pipecolic acid	PM
C11H13NO2	M+H	C11H13NO2+H+	192.102	5-Methoxytryptophol	HMDB0001896	0	1	1	7.16077e-05	7.48189e-05	7.28339e-05	8.6132e-05	7.44436e-05	0.000111077	-0.309119	0.187354	5-Methoxytryptophol	PM
C10H13N5O4	M+H	C10H13N5O4+H+	268.104	Adenosine, Deoxyguanosine	HMDB0000050, HMDB0000085	0	1	1	3.62474e-07	1.58723e-05	4.83587e-06	4.56122e-07	1.56212e-05	8.93085e-06	-0.247168	0.0505567	Adenosine	PM
C7H11NO5	M+H	C7H11NO5+H+	190.071	Glutarylglycine, N-Acetylglutamic acid	HMDB0000590, HMDB0001138	0	1	1	5.14024e-07	1.07369e-05	6.53313e-06	1.95173e-06	1.04019e-05	8.33583e-06	-0.21831	0.0594699	N-Acetylglutamic acid	PM
C9H11NO2	M+H	C9H11NO2+H+	166.086	3-Pyridinebutanoic acid, Norsalsolinol	HMDB0001007, HMDB0006044	0	1	1	0.000297648	0.000291337	0.000233587	0.000274712	0.000308233	0.000347854	-0.178329	0.187354	L-Phenylalanine	PM
C5H9NO2	M+H	C5H9NO2+H+	116.071	L-Proline, D-Proline, Acetamidopropanal, 4-Amino-2-methylenebutanoic acid	HMDB0000162, HMDB0003411, HMDB0012880, HMDB0030409	0	1	1	0.00522197	0.0091998	0.012569	0.00578917	0.00960831	0.0125483	-0.0501692	0.028814	L-Proline	PM
C18H18O7	M+H	C18H18O7+H+	347.113	Hamilcone, 5,2'-Dihydroxy-6,7,6'-trimethoxyflavanone, 5,2'-Dihydroxy-7,8,6'-trimethoxyflavanone, 2,8-Dihydroxy-3,9,10-trimethoxypterocarpan, Amorphaquinone, 2',6'-Dihydroxy-4,3'-dimethoxy-4',5'-methylenedioxydihydrochalcone, 5,2'-Dihydroxy-7,4',5'-trimethoxyflavanone, 5,3'-Dihydroxy-6,7,4'-trimethoxyflavanone, Agestricin D, 5,3'-Dihydroxy-7,8,4'-trimethoxyflavanone, 5,6-Dihydroxy-7,8,4'-trimethox…	LMPK12120349, LMPK12140601, LMPK12140645, LMPK12070070, LMPK12080054, LMPK12120565, LMPK12140536, LMPK12140626, LMPK12140627, LMPK12140673, LMPK12140683, LMPK12140684	0	1	1	0	1.81894e-06	5.46402e-06	4.76071e-07	2.09457e-06	3.93766e-06	0.162244	0.0323745	C18-ceramide	SP
C4H7NO3	M+H	C4H7NO3+H+	118.05	L-2-Amino-3-oxobutanoic acid, Acetylglycine, L-Aspartate-semialdehyde	HMDB0006454, HMDB0000532, HMDB0012249	0	1	1	1.7839e-05	8.54436e-05	0.000126899	1.12619e-05	7.8261e-05	5.7389e-05	0.647823	0.161489	L-2-Amino-3-oxobutanoic acid	FA
C8H8O5	M+H	C8H8O5+H+	185.044	3,4-Dihydroxymandelic acid, 4-O-Methylgallic acid, Methyl 2,4,6-trihydroxybenzoate, 2,4-dihydroxy-5-methoxybenzoic acid, 2,4-dihydroxy-3-methoxybenzoic acid, 2,5-dihydroxy-4-methoxybenzoic acid, 2-(2,4-dihydroxyphenyl)-2-hydroxyacetic acid, 2-(3,4,5-trihydroxyphenyl)acetic acid, 2-(2,3,4-trihydroxyphenyl)acetic acid, 2-(2,4,5-trihydroxyphenyl)acetic acid, 2,3-dihydroxy-4-methoxybenzoic acid	HMDB0001866, HMDB0013198, HMDB0029650, HMDB0125522, HMDB0125542, HMDB0130482, HMDB0126480, HMDB0130405, HMDB0130407, HMDB0130408, HMDB0140912	0	1	1	3.90636e-07	3.06889e-07	5.21907e-06	5.35136e-07	1.5714e-07	3.58343e-07	2.49353	0.18019	3,4-Dihydroxymandelic acid	PM
C22H30O	M+H	C22H30O+H+	311.237	14'-apo-beta-carotenal, (11Z)-8,18-ethanoretinal, Desogestrel	LMPR01070297, LMPR01090043, LMST02030104	1	0	1	2.93558e-05	6.41336e-06	2.67312e-06	4.11112e-05	7.36756e-06	3.3355e-06	-0.430655	0.0718116	FA(22:7)	FA
C3H2O2	M+NH4	C3H2O2+NH4+	88.0393	Propynoic acid	HMDB0006804	1	0	1	0.000532558	0.00062718	0.000375177	0.000762477	0.000643017	0.00041835	-0.248824	0.162439	Propynoic acid	PM
C4H4N2O2	M+H	C4H4N2O2+H+	113.035	Uracil, 4-Carboxypyrazole	HMDB0000300, HMDB0060760	0	0	1									Uracil	PM
C4H9N3O2	M+H	C4H9N3O2+H+	132.077	Creatine, Beta-Guanidinopropionic acid	HMDB0000064, HMDB0013222	0	0	1									Creatine	PM
C6H12O6	M+NH4	C6H12O6+NH4+	198.097	D-Glucose, myo-Inositol, L-Sorbose, D-Galactose, D-Mannose, 3-Deoxyarabinohexonic acid, Beta-D-Glucose, D-Fructose, Allose, Alpha-D-Glucose, D-Tagatose, Beta-D-Galactose, Dihydroxyacetone (dimer), 2,5-bis(hydroxymethyl)oxolane-2,3,4-triol	HMDB0000122, HMDB0000211, HMDB0001266, HMDB0000143, HMDB0000169, HMDB0000346, HMDB0000516, HMDB0000660, HMDB0001151, HMDB0003345, HMDB0003418, HMDB0003449, HMDB0032222, HMDB0125599	0	0	1									D-Glucose	PM
C22H39NO2	M+H	C22H39NO2+H+	350.305	Anandamide (20:3,n-3), Dihomo-gamma-linolenoyl-EA, Mead Acid-EA	LMFA08040005, LMFA08040011, LMFA08040037	1	1	0	2.4576e-05	3.67824e-06	2.93306e-06	4.1782e-05	4.05506e-06	4.81176e-06	-0.699571	0.108106	Anandamide (20:3,n-3)	FA
C18H32O2	M+H	C18H32O2+H+	281.248	Linoleic acid, Bovinic acid, 9E,11E-Octadecadienoic acid, 10E,12Z-Octadecadienoic acid, Linoelaidic acid, Mangiferic acid, Linalyl caprylate, Ethyl 2E,4Z-hexadecadienoate, 5-Octadecynoic acid, Dihomolinoleic acid, 6Z,9Z-octadecadienoic acid, Octadecadienoate	HMDB0000673, HMDB0003797, HMDB0005047, HMDB0005048, HMDB0006270, HMDB0029800, HMDB0030430, HMDB0031051, HMDB0031097, HMDB0061864, HMDB0062238, HMDB0062784	1	1	0	6.90675e-05	3.01008e-05	1.7719e-05	2.81967e-05	2.15371e-05	1.47419e-05	0.858291	0.184195	Linoleic acid	FA
C22H34O2	M+H	C22H34O2+H+	331.263	Docosapentaenoic acid (22n-6), Docosapentaenoic acid, Ethyl abietate, ent-16-Kauren-19-ol acetate, 4,8,12,15,19-Docosapentaenoic acid, Ethyl icosapentate	HMDB0001976, HMDB0006528, HMDB0032257, HMDB0035024, HMDB0039133, HMDB0039530	1	1	0	2.48859e-05	1.574e-06	2.56191e-06	9.49699e-06	8.29227e-07	0	1.49083	0.161489	Docosapentaenoic acid	FA
C11H12O4	M+H	C11H12O4+H+	209.081	(R)-2-Benzylsuccinate, 5-(3',4'-Dihydroxyphenyl)-gamma-valerolactone, 3-(3,5-dimethoxyphenyl)prop-2-enoic acid, methyl (2E)-3-(2-hydroxy-4-methoxyphenyl)prop-2-enoate, (3Z)-3-hydroxy-4-(4-hydroxy-3-methoxyphenyl)but-3-en-2-one, 4-(3,4-dihydroxy-5-methoxyphenyl)but-3-en-2-one, 4-(2,4-dihydroxy-5-methoxyphenyl)but-3-en-2-one, 4-(2,4-dihydroxy-3-methoxyphenyl)but-3-en-2-one, 1-[3-(4-hydroxy-3-methox…	HMDB0012127, HMDB0029185, HMDB0127491, HMDB0131169, HMDB0133456, HMDB0133458, HMDB0133459, HMDB0133460, HMDB0133461, HMDB0133462, HMDB0133474, HMDB0138526, HMDB0142179	0	1	0									Ferulic acid methyl ester	PM
C11H15NO2	M+H	C11H15NO2+H+	194.118	(R)-N-Methylsalsolinol, (S)-N-Methylsalsolinol, (-)-Salsoline, (R)-1,2-dimethyl-5,6-dihydroxy-tetrahydroisoquinoline, 2-Isopropylphenyl methylcarbamate	HMDB0003626, HMDB0003892, HMDB0012469, HMDB0012484, HMDB0031797	0	1	0									(-)-Salsoline	PM
C11H16N2O8	M+H	C11H16N2O8+H+	305.098	N-Acetylaspartylglutamic acid	HMDB0001067	0	1	0									N-Acetylaspartylglutamic acid	PM
C11H17N3O7S	M+NH4	C11H17N3O7S+NH4+	353.113	S-Formylglutathione	HMDB0001550	0	1	0									S-Formylglutathione	PM
C13H15NO2	M+H	C13H15NO2+H+	218.118	N-desisopropylpropranolol	HMDB0060961	0	1	0									N-desisopropylpropranolol	PM
C20H39NO2	M+H	C20H39NO2+H+	326.305	N-Oleoylethanolamine	HMDB0002088	0	1	0									N-Oleoylethanolamine	FA
C3H3NS	M+H	C3H3NS+H+	86.0059	Thiazole	HMDB0029713	0	1	0									Thiazole	PM
C4H6O2	M+H	C4H6O2+H+	87.0441	Gamma-Butyrolactone, Oxolan-3-one, Diacetyl, But-2-enoic acid, Ethenyl acetate, Isocrotonic acid	HMDB0000549, HMDB0002523, HMDB0003407, HMDB0010720, HMDB0031209, HMDB0034439	0	1	0									Gamma-Butyrolactone	FA
C7H6O3	M+H	C7H6O3+H+	139.039	4-Hydroxybenzoic acid, Gentisate aldehyde, 2-Methoxy-1,4-benzoquinone, keratan sulfate II (core 2-linked),degradation product 1	HMDB0000500, HMDB0004062, HMDB0032576, HMDB0062484	0	1	0									4-Hydroxybenzoic acid	PM
C7H8O3	M+H	C7H8O3+H+	141.055	Ethyl maltol, 2-methoxybenzene-1,4-diol, 3-methoxybenzene-1,2-diol, 4-methoxybenzene-1,3-diol, 5-methoxybenzene-1,3-diol, 2-methoxybenzene-1,3-diol, 4-methoxybenzene-1,2-diol	HMDB0031735, HMDB0137138, HMDB0125538, HMDB0125014, HMDB0132905, HMDB0133970, HMDB0137137	0	1	0									3-Methoxycatechol	PM
C7H8O4	M+H	C7H8O4+H+	157.05	Ascladiol, 2,3-Methyleneglutaric acid, 4-methoxybenzene-1,2,3-triol, 2-methoxybenzene-1,3,5-triol, 6-methoxybenzene-1,2,4-triol, 5-methoxybenzene-1,2,3-triol	HMDB0029610, HMDB0059731, HMDB0125064, HMDB0125077, HMDB0140890, HMDB0140891	0	1	0									2,3-Methyleneglutaric acid	PM
C8H9NO	M+H	C8H9NO+H+	136.076	N-Acetylarylamine, 2-Phenylacetamide, 2-Aminoacetophenone, 2'-Aminoacetophenone	HMDB0001250, HMDB0010715, HMDB0032628, HMDB0032630	0	1	0									2-Phenylacetamide	PM
C9H10O4	M+H	C9H10O4+H+	183.065	Hydroxyphenyllactic acid, 2',6'-Dihydroxy-4'-methoxyacetophenone, Homovanillic acid, Isohomovanillic acid, 3-(3-Hydroxyphenyl)-3-hydroxypropanoic acid, 3-Methoxy-4-hydroxyphenylglycolaldehyde, 2,6-Dimethoxybenzoic acid, 3-(3,5-dihydroxyphenyl)propanoic acid, 3,5-dimethoxybenzoic acid, 4-ethenyl-6-methoxybenzene-1,2,3-triol, 5-ethenyl-3-methoxybenzene-1,2,4-triol, 2-hydroxy-2-(4-methoxyphenyl)acet…	HMDB0000755, HMDB0029646, HMDB0000118, HMDB0000333, HMDB0002643, HMDB0004061, HMDB0029273, HMDB0125533, HMDB0127495, HMDB0125591, HMDB0125595, HMDB0140294, HMDB0124923, HMDB0126386, HMDB0129348, HMDB0134042, HMDB0134043, HMDB0131428, HMDB0133494, HMDB0133788, HMDB0140892	0	1	0									Hydroxyphenyllactic acid	PM
C9H17O7P	M+H	C9H17O7P+H+	269.078	DHAP(6:0)	HMDB0011679	0	1	0									DHAP(6:0)	PM
C9H8O3	M+H	C9H8O3+H+	165.055	9-hydroxy-7Z-Nonene-3,5-diynoic acid, 9-hydroxy-7E-Nonene-3,5-diynoic acid	LMFA01030722, LMFA01030721	0	1	0									Phenylpyruvic acid	PM
C18H32O	M+H	C18H32O+H+	265.253	9Z,12Z-Octadecadienal, 11E,14E-Octadecadienal, 2E,13Z-Octadecadienal, 3Z,13Z-Octadecadienal, 6S,7R-Epoxy-3Z,9Z-octadecadiene, 3,4-Epoxy-6,9-octadecadiene, 5-(1-hydroxypropan-2-yl)isolongifolane, 9,12,15-Octadecatrien-1-ol, 9,12-octadecadienal, 3E,13Z-Octadecadienal, 11Z,13Z-Octadecadienal, 13Z,15Z-Octadecadienal, 9S,10R-Epoxy-6Z-octadecene	LMFA06000242, LMFA06000233, LMFA06000234, LMFA06000241, LMFA12000287, LMFA12000288, LMPR0103500010, LMFA05000216, LMFA06000101, LMFA06000235, LMFA06000239, LMFA06000240, LMFA12000284	1	0	0									FA(18:2)	FA
C18H34O2	M+H	C18H34O2+H+	283.263	Oleic acid, Elaidic acid, Vaccenic acid, (Z)-13-Octadecenoic acid, Ethyl 9-hexadecenoate, (E)-13-Octadecenoic acid, 7Z-octadecenoic acid, Octadec-9-enoic Acid	HMDB0000207, HMDB0000573, HMDB0003231, HMDB0041480, HMDB0059871, HMDB0062218, HMDB0062242, HMDB0062703	1	0	0									Oleic acid, Elaidic acid, Vaccenic acid	FA
C18H36O2	M+H	C18H36O2+H+	285.279	Stearic acid, Ethyl hexadecanoate, 16-Methylheptadecanoic acid, Hexyl dodecanoate	HMDB0000827, HMDB0029811, HMDB0031066, HMDB0061946	1	0	0									Stearic acid	FA
C20H34O2	M+H	C20H34O2+H+	307.263	8,11,14-Eicosatrienoic acid, 5,8,11-Eicosatrienoic acid, Sciadonic acid, Sagittariol, 11,14,17-Eicosatrienoic acid	HMDB0002925, HMDB0010378, HMDB0031058, HMDB0036835, HMDB0060039	1	0	0									11,14,17-eicosatrienoic acid	FA
C21H32O2	M+NH4	C21H32O2+NH4+	334.274	Pregnenolone, 20a-Dihydroprogesterone, 5a-Pregnane-3,20-dione, Ethyltestosterone, Bolasterone, (3beta,5alpha)-3-Hydroxypregn-16-en-20-one, Kaurenoic acid methyl ester, 5-alpha-Pregnan-3,20-dione	HMDB0000253, HMDB0003069, HMDB0003759, HMDB0006002, HMDB0006048, HMDB0034369, HMDB0036729, HMDB0059652	1	0	0									Pregnenolone	ST
C22H37NO2	M+H	C22H37NO2+H+	348.29	Anandamide, O-Arachidonoyl Ethanolamine	HMDB0004080, HMDB0013655	1	0	0									Anandamide (20:4,n-6)	FA
C24H36O2	M+H	C24H36O2+H+	357.279	Tetracosahexaenoic acid, Tetracosahexaenoic acid,n-3	HMDB0002007, HMDB0060117	1	0	0									Tetracosahexaenoic acid	FA
C25H37NO2	M+H	C25H37NO2+H+	384.29	Macamide	LMFA08020160	1	0	0									Macamide	FA
C4H4N2	M+H	C4H4N2+H+	81.0447	Pyrimidine	HMDB0003361	1	0	0									Pyrimidine	PM
C5H5N5	M+H	C5H5N5+H+	136.062	Adenine	HMDB0000034	1	0	0									Adenine	PM
Lipid Mass Range
						Replicate Detection			Lesion (TIC-Normalized Average Ion Abundance)			Healthy (TIC-Normalized Average Ion Abundance)
formula	adduct	ion	mz	moleculeNames	moleculeIds	I	II	III	I	II	III	I	II	III	log2(Fold Change) (Lesion/Healthy)	"-log10(BH-Adjusted P-Value)"	Selected Annotation	Category	Gel Component
C18H36O2	M+H	C18H36O2+H+	285.279	Stearic acid, Ethyl hexadecanoate, 16-Methylheptadecanoic acid, Hexyl dodecanoate	HMDB0000827, HMDB0029811, HMDB0031066, HMDB0061946	1	1	1	0.000830615	0.000481378	0.000536616	0.00118285	0.000410906	0.000427965	-0.129141	0.0417729	Stearic acid	FA	Edge
C7H9N3O4	M+H	C7H9N3O4+H+	200.067	(S)-Isowillardiine	HMDB0030376	1	1	1	6.81357e-05	0.00099802	0.00116693	0	0	0	Only in Lesion	0.529776	(S)-Isowillardiine/Willardine	PM	Edge
C16H32O2	M+H	C16H32O2+H+	257.248	Ethyl tetradecanoate, Palmitic acid, Trimethyltridecanoic acid, Isopalmitic acid, Butyl dodecanoate, Dodecyl butyrate, Hexyl decanoate, Octyl octanoate, Dodecyl 2-methylpropanoate	HMDB0034153, HMDB0000220, HMDB0002396, HMDB0031068, HMDB0032065, HMDB0032249, HMDB0032324, HMDB0033166, HMDB0036210	0	0	1									Palmitic acid	FA	Edge
C18H35NO	M+H	C18H35NO+H+	282.279	Oleamide	HMDB0002117	1	1	1	0.000253612	0.000213368	0.000381038	0.000948088	0.00142036	0.00162642	-2.23598	0.736928	Oleamide	FA	Yes
C18H37NO	M+H	C18H37NO+H+	284.295	Stearamide	LMFA08010003	1	1	1	0.000154315	0.000140563	0.000151493	0.000215584	0.00022743	0.000275264	-0.686296	0.730554	Stearamide	FA	Yes
C19H36O3	M+H	C19H36O3+H+	313.274	10-oxo-nonadecanoic acid, 2-oxo-nonadecanoic acid, 18-oxo-nonadecanoic acid, 3-oxo-nonadecanoic acid	LMFA01060128, LMFA01060130, LMFA01060129, LMFA01060131	1	1	1	0.000359692	0.000485865	0.000541127	0.00069955	0.000445563	0.000464054	-0.214674	0.240049	3-oxo-nonadecanoic acid	FA	Yes
C18H35NO2	M+H	C18H35NO2+H+	298.274	Palmitoleoyl Ethanolamide	HMDB0013648	0	1	0									Palmitoleoyl Ethanolamide	FA	Yes
C25H45NO5	M+H	C25H45NO5+H+	440.337	3-hydroxylinoleoylcarnitine	LMFA07070042	0	0	1									3-hydroxylinoleoylcarnitine	FA	Yes
C42H84NO8P	M+H	C42H84NO8P+H+	762.601	PC(14:0/20:0), PC(16:0/18:0), PC(18:0/16:0), PC(20:0/14:0), PE(15:0/22:0), PE(22:0/15:0), PE-NMe(18:0/18:0)	HMDB0007878, HMDB0007970, HMDB0008034, HMDB0008262, HMDB0008907, HMDB0009483, HMDB0112975	1	1	1	1.07559e-06	4.34068e-06	2.12994e-06	2.8764e-05	9.3456e-05	9.16759e-05	-4.82501	0.624732	PC(34:0)	GP
C44H86NO8P	M+H	C44H86NO8P+H+	788.616	PC(14:0/22:1(13Z)), PC(14:1(9Z)/22:0), PC(16:0/20:1(11Z)), PC(16:1(9Z)/20:0), PC(18:0/18:1(11Z)), PC(18:0/18:1(9Z)), PC(18:1(11Z)/18:0), PC(18:1(9Z)/18:0), PC(20:0/16:1(9Z)), PC(20:1(11Z)/16:0), PC(22:0/14:1(9Z)), PC(22:1(13Z)/14:0), PE(15:0/24:1(15Z)), PE(24:1(15Z)/15:0)	HMDB0007887, HMDB0007919, HMDB0007978, HMDB0008010, HMDB0008037, HMDB0008038, HMDB0008069, HMDB0008102, HMDB0008266, HMDB0008298, HMDB0008526, HMDB0008558, HMDB0008915, HMDB0009747	1	1	1	7.22541e-06	1.34566e-05	5.49801e-06	4.80601e-05	0.000175855	0.000163277	-3.88651	0.624732	PC(36:1)	GP
C44H84NO8P	M+H	C44H84NO8P+H+	786.601	PC(18:1(9Z)/18:1(9Z)), PC(14:0/22:2(13Z,16Z)), PC(14:1(9Z)/22:1(13Z)), PC(16:0/20:2(11Z,14Z)), PC(16:1(9Z)/20:1(11Z)), PC(18:0/18:2(9Z,12Z)), PC(18:1(11Z)/18:1(11Z)), PC(18:1(11Z)/18:1(9Z)), PC(18:1(9Z)/18:1(11Z)), PC(18:2(9Z,12Z)/18:0), PC(20:1(11Z)/16:1(9Z)), PC(20:2(11Z,14Z)/16:0), PC(22:1(13Z)/14:1(9Z)), PC(22:2(13Z,16Z)/14:0), 1,2-dioleoyl-sn-glycero-3-phosphocholine	HMDB0000593, HMDB0007888, HMDB0007920, HMDB0007979, HMDB0008011, HMDB0008039, HMDB0008070, HMDB0008071, HMDB0008103, HMDB0008135, HMDB0008299, HMDB0008331, HMDB0008559, HMDB0008590, HMDB0062690	1	1	1	9.59737e-07	4.99091e-06	1.70116e-06	1.12386e-05	5.18338e-05	4.97905e-05	-3.88263	0.624732	PC(36:2)	GP
C46H78O5	M+NH4	C46H78O5+NH4+	728.619	DG(21:0/22:6(4Z,7Z,10Z,13Z,16Z,19Z)/0:0)[iso2]	LMGL02010290	1	1	1	3.32821e-06	1.77922e-05	5.70441e-06	4.27734e-05	0.000243189	9.54954e-05	-3.82988	0.477475	DG(43:6)	GL
C48H84NO8P	M+H	C48H84NO8P+H+	834.601	PC(18:0/22:6(9Z,11Z,13Z,15Z,17Z,19)), PC(20:3(8Z,11Z,14Z)/20:3(8Z,11Z,14Z)), PC(20:5(5Z,8Z,11Z,14Z,17Z)/20:1(11Z)), PE(22:6(4Z,7Z,10Z,13Z,16Z,19Z)/21:0), PC(18:0/22:6(4Z,7Z,10Z,13Z,16Z,19Z)), PC(18:1(11Z)/22:5(7Z,10Z,13Z,16Z,19Z)), PC(18:2(9Z,12Z)/22:4(7Z,10Z,13Z,16Z)), PC(18:4(6Z,9Z,12Z,15Z)/22:2(13Z,16Z)), PC(20:1(11Z)/20:5(5Z,8Z,11Z,14Z,17Z)), PC(20:2(11Z,14Z)/20:4(5Z,8Z,11Z,14Z)), PC(20:4(5Z,…	LMGP01010823, LMGP01011888, LMGP01011945, LMGP02011156, LMGP01010821, LMGP01010846, LMGP01011639, LMGP01011728, LMGP01011828, LMGP01011858, LMGP01011917, LMGP01012051, LMGP01012079, LMGP01012107, LMGP02010004	1	1	1	7.02603e-07	3.61551e-06	2.52069e-06	1.18256e-05	4.08261e-05	3.31826e-05	-3.64974	0.624732	PC(40:6)	GP
C40H76O5	M+NH4	C40H76O5+NH4+	654.603	DG(17:1(9Z)/20:0/0:0)[iso2], DG(17:0/20:1(11Z)/0:0)[iso2], DG(18:1(9Z)/19:0/0:0)[iso2], DG(16:1(9Z)/21:0/0:0)[iso2], DG(15:1(9Z)/22:0/0:0)[iso2], DG(19:1(9Z)/18:0/0:0)[iso2], DG(15:0/22:1(11Z)/0:0)[iso2]	LMGL02010059, LMGL02010060, LMGL02010072, LMGL02010095, LMGL02010467, LMGL02010527, LMGL02010444	1	1	1	5.87218e-06	2.56429e-06	3.83569e-06	1.2048e-05	0.000101137	3.37172e-05	-3.5814	0.442767	DG(37:1)	GL
C40H80NO8P	M+H	C40H80NO8P+H+	734.569	PC(16:0/16:0), PC(14:0/18:0), PC(18:0/14:0), PE(15:0/20:0), PE(20:0/15:0)	HMDB0000564, HMDB0007871, HMDB0008031, HMDB0008899, HMDB0009219	1	1	1	1.87027e-05	6.4338e-05	3.36917e-05	0.000231642	0.000556205	0.000502454	-3.46643	0.660026	PC(32:0)	GP
C46H80NO8P	M+H	C46H80NO8P+H+	806.569	PC(16:0/22:6(4Z,7Z,10Z,13Z,16Z,19Z)), PC(16:1(9Z)/22:5(4Z,7Z,10Z,13Z,16Z)), PC(16:1(9Z)/22:5(7Z,10Z,13Z,16Z,19Z)), PC(18:1(11Z)/20:5(5Z,8Z,11Z,14Z,17Z)), PC(18:1(9Z)/20:5(5Z,8Z,11Z,14Z,17Z)), PC(18:2(9Z,12Z)/20:4(5Z,8Z,11Z,14Z)), PC(18:2(9Z,12Z)/20:4(8Z,11Z,14Z,17Z)), PC(18:3(6Z,9Z,12Z)/20:3(5Z,8Z,11Z)), PC(18:3(6Z,9Z,12Z)/20:3(8Z,11Z,14Z)), PC(18:3(9Z,12Z,15Z)/20:3(5Z,8Z,11Z)), PC(18:3(9Z,12Z,15…	HMDB0007991, HMDB0008022, HMDB0008024, HMDB0008083, HMDB0008116, HMDB0008147, HMDB0008148, HMDB0008178, HMDB0008179, HMDB0008211, HMDB0008212, HMDB0008243, HMDB0008339, HMDB0008370, HMDB0008371, HMDB0008403, HMDB0008404, HMDB0008434, HMDB0008467, HMDB0008498, HMDB0008499, HMDB0008660, HMDB0008693, HMDB0008725	1	1	1	1.23084e-06	1.40238e-05	5.59398e-06	3.8432e-05	0.000101963	8.54225e-05	-3.43714	0.660026	PC(38:6)	GP
C37H74NO8P	M+H	C37H74NO8P+H+	692.522	PC(14:0/15:0), PC(15:0/14:0), PE(14:0/18:0), PE(16:0/16:0), PE(18:0/14:0), 3-Sn-phosphatidylethanolamine	HMDB0007868, HMDB0007932, HMDB0008826, HMDB0008923, HMDB0008986, HMDB0029174	1	1	1	4.52938e-06	8.06895e-06	2.81381e-06	4.84216e-05	5.21497e-05	6.49144e-05	-3.42457	0.929802	PE(32:0)	GP
C23H43NO3S	M+NH4	C23H43NO3S+NH4+	431.33	N-oleoyl methionine	LMFA08020110	1	1	1	1.69873e-05	3.29308e-05	2.49273e-05	0.000131922	0.000380914	0.00023926	-3.32893	0.624732	N-oleoyl methionine	FA
C42H80O5	M+NH4	C42H80O5+NH4+	682.634	DG(17:1(9Z)/22:0/0:0)[iso2], DG(17:0/22:1(13Z)/0:0)[iso2], DG(18:1(9Z)/21:0/0:0)[iso2], DG(19:1(9Z)/20:0/0:0)[iso2], DG(19:0/20:1(11Z)/0:0)[iso2]	LMGL02010124, LMGL02010125, LMGL02010144, LMGL02010532, LMGL02010118	1	1	1	1.0061e-05	4.42839e-06	1.05494e-06	8.27643e-06	0.000111844	3.49028e-05	-3.31803	0.412756	DG(39:1)	GL
C42H82NO8P	M+H	C42H82NO8P+H+	760.585	PC(14:0/20:1(11Z)), PC(14:1(9Z)/20:0), PC(16:0/18:1(11Z)), PC(16:0/18:1(9Z)), PC(16:1(9Z)/18:0), PC(18:0/16:1(9Z)), PC(18:1(11Z)/16:0), PC(18:1(9Z)/16:0), PC(20:0/14:1(9Z)), PC(20:1(11Z)/14:0), PE(15:0/22:1(13Z)), PE(22:1(13Z)/15:0)	HMDB0007879, HMDB0007911, HMDB0007971, HMDB0007972, HMDB0008003, HMDB0008035, HMDB0008067, HMDB0008100, HMDB0008263, HMDB0008295, HMDB0008908, HMDB0009516	1	1	1	4.0962e-05	0.000116602	5.73689e-05	0.000400296	0.000829015	0.000787866	-3.23038	0.697589	PC(34:1)	GP
C20H35NO	M+H	C20H35NO+H+	306.279	Clavepictine B	LMSP01080053	1	1	1	2.98229e-06	0	4.53929e-06	1.64329e-05	2.46056e-05	2.8937e-05	-3.21774	0.741418	Clavepictine B	SP
C36H64O2	M+NH4	C36H64O2+NH4+	546.524	Linolenyl oleate, Linoleyl linoleate, 36:4(21Z,24Z,27Z,30Z), Oleyl linolenate	LMFA07010145, LMFA07010146, LMFA01030829, LMFA07010147	1	1	1	7.66552e-06	3.17392e-06	1.55654e-06	1.32246e-05	4.36183e-05	5.50371e-05	-3.17401	0.624732	Linoleyl linoleate	FA
C46H84NO8P	M+H	C46H84NO8P+H+	810.601	PC(16:0/22:4(7Z,10Z,13Z,16Z)), PC(18:0/20:4(5Z,8Z,11Z,14Z)), PC(18:0/20:4(8Z,11Z,14Z,17Z)), PC(18:1(11Z)/20:3(5Z,8Z,11Z)), PC(18:1(11Z)/20:3(8Z,11Z,14Z)), PC(18:1(9Z)/20:3(5Z,8Z,11Z)), PC(18:1(9Z)/20:3(8Z,11Z,14Z)), PC(18:2(9Z,12Z)/20:2(11Z,14Z)), PC(18:3(6Z,9Z,12Z)/20:1(11Z)), PC(18:3(9Z,12Z,15Z)/20:1(11Z)), PC(18:4(6Z,9Z,12Z,15Z)/20:0), PC(20:0/18:4(6Z,9Z,12Z,15Z)), PC(20:1(11Z)/18:3(6Z,9Z,12Z)…	HMDB0007988, HMDB0008048, HMDB0008049, HMDB0008079, HMDB0008080, HMDB0008112, HMDB0008113, HMDB0008145, HMDB0008176, HMDB0008209, HMDB0008241, HMDB0008273, HMDB0008304, HMDB0008305, HMDB0008336, HMDB0008367, HMDB0008368, HMDB0008400, HMDB0008401, HMDB0008431, HMDB0008464, HMDB0008626	1	1	1	3.34499e-06	8.99952e-06	2.8757e-06	1.993e-05	4.77049e-05	6.02202e-05	-3.07045	0.624732	PC(38:4)	GP
C44H78O5	M+NH4	C44H78O5+NH4+	704.619	DG(20:4(5Z,8Z,11Z,14Z)/21:0/0:0)[iso2], DG(19:0/22:4(7Z,10Z,13Z,16Z)/0:0)[iso2], DG(19:1(9Z)/22:3(10Z,13Z,16Z)/0:0)[iso2]	LMGL02010227, LMGL02010232, LMGL02010542	1	1	1	2.72617e-06	2.1193e-06	1.33536e-06	9.17202e-07	3.38073e-05	1.54535e-05	-3.02118	0.423694	DG(41:4)	GL
C24H41NO	M+NH4	C24H41NO+NH4+	377.353	N-butyl arachidonoyl amine, N-tert-butyl arachidonoyl amine, (-)N-(1R-methyl-propyl) arachidonoyl amine, (+)N-(1S-methyl-propyl) arachidonoyl amine, N,N-diethyl arachidonoyl amine, N-propyl alpha-methyl arachidonoyl amine, N-isopropyl alpha-methylarachidonoyl amine	LMFA08020011, LMFA08020012, LMFA08020016, LMFA08020017, LMFA08020024, LMFA08020033, LMFA08020035	1	1	1	1.54728e-05	2.33695e-06	3.30897e-06	3.88714e-05	6.18533e-05	6.04599e-05	-2.93212	0.878622	N-butyl arachidonoyl amine	FA
C18H33NO	M+H	C18H33NO+H+	280.263	Linoleamide	HMDB0062656	1	1	1	4.48513e-06	7.55922e-06	1.23425e-05	4.01981e-05	6.95329e-05	7.29036e-05	-2.90479	0.730554	Linoleamide	FA
C43H72O5	M+NH4	C43H72O5+NH4+	686.572	DG(20:3(8Z,11Z,14Z)/20:3(8Z,11Z,14Z)/0:0), DG(20:1(11Z)/20:5(5Z,8Z,11Z,14Z,17Z)/0:0)[iso2], DG(18:2(9Z,12Z)/22:4(7Z,10Z,13Z,16Z)/0:0)[iso2], DG(18:0/22:6(4Z,7Z,10Z,13Z,16Z,19Z)/0:0)[iso2], DG(20:2(11Z,14Z)/20:4(5Z,8Z,11Z,14Z)/0:0)[iso2], DG(18:3(9Z,12Z,15Z)/22:3(10Z,13Z,16Z)/0:0)[iso2], DG(18:1(9Z)/22:5(7Z,10Z,13Z,16Z,19Z)/0:0)[iso2], DG(18:3(6Z,9Z,12Z)/22:3(10Z,13Z,16Z)/0:0)[iso2], DG(18:4(6Z,9Z…	LMGL02010186, LMGL02010188, LMGL02010214, LMGL02010216, LMGL02010187, LMGL02010202, LMGL02010215, LMGL02010494, LMGL02010517	1	1	1	1.14642e-05	6.89972e-06	2.1671e-06	5.10721e-05	4.94542e-05	4.37744e-05	-2.8132	1.60972	DG(40:6)	GL
C29H48O4	M+NH4	C29H48O4+NH4+	478.389	13'-Carboxy-alpha-tocopherol, (3beta,5alpha,6beta,9alpha,22E,24R)-23-Methylergosta-7,22-diene-3,5,6,9-tetrol	HMDB0012555, HMDB0033634	1	1	1	2.38385e-06	6.61802e-06	7.41172e-06	1.39336e-05	4.92488e-05	5.07018e-05	-2.7946	0.624732	13'-Carboxy-alpha-tocopherol	PM
C44H80NO8P	M+H	C44H80NO8P+H+	782.569	PC(14:0/22:4(7Z,10Z,13Z,16Z)), PC(16:0/20:4(5Z,8Z,11Z,14Z)), PC(16:0/20:4(8Z,11Z,14Z,17Z)), PC(16:1(9Z)/20:3(5Z,8Z,11Z)), PC(16:1(9Z)/20:3(8Z,11Z,14Z)), PC(18:0/18:4(6Z,9Z,12Z,15Z)), PC(18:1(11Z)/18:3(6Z,9Z,12Z)), PC(18:1(11Z)/18:3(9Z,12Z,15Z)), PC(18:1(9Z)/18:3(6Z,9Z,12Z)), PC(18:1(9Z)/18:3(9Z,12Z,15Z)), PC(18:2(9Z,12Z)/18:2(9Z,12Z)), PC(18:3(6Z,9Z,12Z)/18:1(11Z)), PC(18:3(6Z,9Z,12Z)/18:1(9Z)), …	HMDB0007889, HMDB0007982, HMDB0007983, HMDB0008013, HMDB0008014, HMDB0008042, HMDB0008073, HMDB0008074, HMDB0008106, HMDB0008107, HMDB0008138, HMDB0008169, HMDB0008170, HMDB0008202, HMDB0008203, HMDB0008234, HMDB0008365, HMDB0008398, HMDB0008429, HMDB0008462, HMDB0008623	1	1	1	5.06411e-06	2.04314e-05	1.28047e-05	3.98069e-05	8.95194e-05	9.4975e-05	-2.55001	0.660026	PC(36:4)	GP
C20H34O	M+NH4	C20H34O+NH4+	308.295	Presphaerol, (-)-Dilophol, 8-[3]-ladderane-1-octanol, cis-9,10-Epoxy-1,3Z,6Z-eicosatriene, 5-(1-methoxybutan-2-yl)isolongifol-5-ene, Geranylgeraniol, aphidicolan-16beta-ol, Verrucosan-2b-ol, (+)-Verticillol, (+)-Tormesol, (Z,Z,Z)-geranylgeraniol, tuberculosinol	LMPR0104220002, LMPR0104450002, LMFA05000066, LMFA12000308, LMPR0103500014, LMPR0104010009, LMPR0104160002, LMPR0104280002, LMPR0104380001, LMPR0104530001, LMPR0104010018, LMPR0104030005	1	1	1	0.000115021	8.30365e-05	0.000117608	0.000430924	0.000634521	0.000717718	-2.49797	0.736928	Geranylgeraniol	PR
C39H76NO8P	M+H	C39H76NO8P+H+	718.538	PC(15:0/16:1(9Z)), PC(16:1(9Z)/15:0), PE(14:0/20:1(11Z)), PE(14:1(9Z)/20:0), PE(16:0/18:1(11Z)), PE(16:0/18:1(9Z)), PE(16:1(9Z)/18:0), PE(18:0/16:1(9Z)), PE(18:1(11Z)/16:0), PE(18:1(9Z)/16:0), PE(20:0/14:1(9Z)), PE(20:1(11Z)/14:0)	HMDB0007936, HMDB0008000, HMDB0008834, HMDB0008866, HMDB0008926, HMDB0008927, HMDB0008958, HMDB0008990, HMDB0009022, HMDB0009055, HMDB0009218, HMDB0009250	1	1	1	2.08062e-05	2.85319e-05	2.14819e-05	0.000123483	0.000126339	0.000145181	-2.47964	1.35217	PE(34:1)	GP
C40H78NO8P	M+H	C40H78NO8P+H+	732.554	PC(14:0/18:1(11Z)), PC(14:0/18:1(9Z)), PC(14:1(9Z)/18:0), PC(16:0/16:1(9Z)), PC(16:1(9Z)/16:0), PC(18:0/14:1(9Z)), PC(18:1(11Z)/14:0), PC(18:1(9Z)/14:0), PE(15:0/20:1(11Z)), PE(20:1(11Z)/15:0), PE-NMe(16:0/18:1(9Z))	HMDB0007872, HMDB0007873, HMDB0007904, HMDB0007969, HMDB0008001, HMDB0008032, HMDB0008064, HMDB0008097, HMDB0008900, HMDB0009252, HMDB0010569	1	1	1	3.00412e-06	9.50019e-06	6.09934e-06	8.21818e-06	4.69393e-05	4.74799e-05	-2.4639	0.529776	PC(32:1)	GP
C23H43NO6	M+H	C23H43NO6+H+	430.316	Hexadecanedioic acid mono-L-carnitine ester	HMDB0000712	1	1	1	3.15306e-06	2.59092e-06	1.73437e-06	8.08819e-06	1.58329e-05	1.56647e-05	-2.40419	0.690261	Hexadecanedioic acid mono-L-carnitine ester	FA
C13H16N2O	M+H	C13H16N2O+H+	217.134	Nb-Acetyl-Nb-methyltryptamine	HMDB0029837	1	1	1	8.62312e-06	4.20703e-05	4.76405e-05	6.9144e-05	0.000183241	0.000218878	-2.26077	0.624732	Nb-Acetyl-Nb-methyltryptamine	PM
C14H22N2O2	M+H	C14H22N2O2+H+	251.175	3-Hydroxylidocaine	HMDB0060655	1	1	1	7.77272e-06	3.51827e-05	5.00409e-05	4.58442e-05	0.000174164	0.000209778	-2.20837	0.549436	3-Hydroxylidocaine	PM
C45H78NO8P	M+H	C45H78NO8P+H+	792.554	PC(15:0/22:6(4Z,7Z,10Z,13Z,16Z,19Z)), PC(22:6(4Z,7Z,10Z,13Z,16Z,19Z)/15:0), PE(18:0/22:6(4Z,7Z,10Z,13Z,16Z,19Z)), PE(18:1(11Z)/22:5(4Z,7Z,10Z,13Z,16Z)), PE(18:1(11Z)/22:5(7Z,10Z,13Z,16Z,19Z)), PE(18:1(9Z)/22:5(4Z,7Z,10Z,13Z,16Z)), PE(18:1(9Z)/22:5(7Z,10Z,13Z,16Z,19Z)), PE(18:2(9Z,12Z)/22:4(7Z,10Z,13Z,16Z)), PE(18:4(6Z,9Z,12Z,15Z)/22:2(13Z,16Z)), PE(20:1(11Z)/20:5(5Z,8Z,11Z,14Z,17Z)), PE(20:2(11Z,…	HMDB0007958, HMDB0008724, HMDB0009012, HMDB0009043, HMDB0009044, HMDB0009076, HMDB0009077, HMDB0009108, HMDB0009206, HMDB0009269, HMDB0009300, HMDB0009301, HMDB0009331, HMDB0009332, HMDB0009364, HMDB0009365, HMDB0009396, HMDB0009429, HMDB0009461, HMDB0009558, HMDB0009588, HMDB0009619, HMDB0009620, HMDB0009652, HMDB0009653, HMDB0009684, HMDB0113959	1	1	1	8.30626e-06	1.23725e-05	1.48617e-05	5.33956e-05	4.81751e-05	4.83278e-05	-2.07645	1.74599	PE(40:6)	GP
C39H74O5	M+NH4	C39H74O5+NH4+	640.587	DG(16:1(9Z)/20:0/0:0)[iso2], DG(17:1(9Z)/19:0/0:0)[iso2], DG(15:1(9Z)/21:0/0:0)[iso2], DG(19:1(9Z)/17:0/0:0)[iso2], DG(18:0/18:1(9Z)/0:0)[iso2], DG(16:0/20:1(11Z)/0:0)[iso2], DG(14:0/22:1(11Z)/0:0)[iso2], DG(14:1(9Z)/22:0/0:0)[iso2]	LMGL02010047, LMGL02010052, LMGL02010466, LMGL02010524, LMGL02010043, LMGL02010048, LMGL02010396, LMGL02010419	1	1	1	1.60513e-05	4.11595e-06	7.93944e-07	1.81976e-05	4.1324e-05	2.79428e-05	-2.06098	0.660026	DG(36:1)	GL
C17H33NO5	M+H	C17H33NO5+H+	332.243	3-hydroxydecanoyl carnitine	HMDB0061636	1	1	1	1.29652e-06	7.26765e-06	7.13978e-06	1.36563e-05	3.28954e-05	1.66069e-05	-2.00785	0.624732	3-hydroxydecanoyl carnitine	FA
C39H78NO8P	M+H	C39H78NO8P+H+	720.554	PE(13:0/21:0), PC(15:0/16:0), PC(16:0/15:0), PC(19:0/12:0), PC(12:0/19:0), PC(17:0/14:0), PE-NMe2(16:0/16:0), PE(14:0/20:0), PE(15:0/19:0), PC(11:0/20:0), PC(13:0/18:0), PC(9:0/22:0), PC(10:0/21:0), PC(20:0/11:0), PC(21:0/10:0), PC(18:0/13:0), PE(22:0/12:0), PE(21:0/13:0), PE(20:0/14:0), PE(19:0/15:0), PE(18:0/16:0), PE(17:0/17:0), PE(16:0/18:0), PE(12:0/22:0), PC(14:0/17:0)	LMGP02011252, LMGP01010532, LMGP01010562, LMGP01010967, LMGP01011327, LMGP01011499, LMGP02010325, LMGP02011243, LMGP02011231, LMGP01010417, LMGP01011346, LMGP01011266, LMGP01010396, LMGP01010996, LMGP01011061, LMGP01011581, LMGP02011165, LMGP02011169, LMGP02011180, LMGP02011185, LMGP02011205, LMGP02011213, LMGP02011225, LMGP02011258, LMGP01011366	1	1	1	2.54379e-06	2.88569e-05	2.8187e-05	3.16779e-05	9.40521e-05	0.000112858	-2.00143	0.604077	PE(34:0)	GP
C13H18N2O	M+H	C13H18N2O+H+	219.149	5-Methoxydimethyltryptamine, N-despropyl ropinirole	HMDB0002004, HMDB0060625	1	1	1	9.37121e-06	3.80814e-05	4.74581e-05	6.01284e-05	0.00014757	0.000169482	-1.99061	0.624732	5-Methoxydimethyltryptamine	PM
C41H78NO8P	M+H	C41H78NO8P+H+	744.554	PC(15:0/18:2(9Z,12Z)), PC(18:2(9Z,12Z)/15:0), PE(14:0/22:2(13Z,16Z)), PE(14:1(9Z)/22:1(13Z)), PE(16:0/20:2(11Z,14Z)), PE(16:1(9Z)/20:1(11Z)), PE(18:0/18:2(9Z,12Z)), PE(18:1(11Z)/18:1(11Z)), PE(18:1(11Z)/18:1(9Z)), PE(18:1(9Z)/18:1(11Z)), PE(18:1(9Z)/18:1(9Z)), PE(18:2(9Z,12Z)/18:0), PE(20:1(11Z)/16:1(9Z)), PE(20:2(11Z,14Z)/16:0), PE(22:1(13Z)/14:1(9Z)), PE(22:2(13Z,16Z)/14:0)	HMDB0007940, HMDB0008132, HMDB0008843, HMDB0008875, HMDB0008934, HMDB0008966, HMDB0008994, HMDB0009025, HMDB0009026, HMDB0009058, HMDB0009059, HMDB0009090, HMDB0009254, HMDB0009286, HMDB0009515, HMDB0009547	1	1	1	1.8261e-06	1.56373e-05	1.08178e-05	2.76819e-05	4.14025e-05	4.20353e-05	-1.9742	0.86853	PE(36:2)	GP
C36H66O2	M+NH4	C36H66O2+NH4+	548.54	Oleyl linoleate, Stearyl linolenate, Linolenyl stearate, Linoleyl oleate	LMFA07010150, LMFA07010151, LMFA07010148, LMFA07010149	1	1	1	0.000135434	0.00012586	0.000115805	0.000384715	0.000529573	0.000565048	-1.97194	0.741418	Oleyl linoleate	FA
C25H38O4	M+NH4	C25H38O4+NH4+	420.311	MG(0:0/22:6(4Z,7Z,10Z,13Z,16Z,19Z)/0:0), 1alpha-hydroxy-26,27-dinorvitamin D3 25-carboxylic acid / 1alpha-hydroxy-26,27-dinorcholecalciferol 25-carboxylic acid, (+)-Scalarin, 16-O-deacetyl-16-epi-scalarolbutenolide	LMGL01010027, LMST03020025, LMPR0105060001, LMPR0105060005	1	1	1	9.1939e-06	1.03424e-05	7.48462e-06	6.24079e-05	2.02735e-05	2.03957e-05	-1.93157	0.460002	MG(22:6)	GL
C21H41NO4	M+H	C21H41NO4+H+	372.311	Tetradecanoylcarnitine	HMDB0005066	1	1	1	1.4328e-06	4.22043e-06	3.3245e-06	8.98246e-06	1.30981e-05	1.04036e-05	-1.85531	0.905441	Tetradecanoylcarnitine	FA
C18H34O4	M+NH4	C18H34O4+NH4+	332.28	(9Z)-(7S,8S)-Dihydroxyoctadecenoic acid, 10-Hydroxy-9-ketooctadecanoic acid, 3-Acetoxy-palmitic acid, Octadecanedioic acid, 9-Hydroxy-10-ketooctadecanoic acid, 18-hydroxy-9R,10S-epoxy-stearic acid, 6-HpOME(7E), 7S,10S-diHOME, 8R,11S-DiHOME, 11R-HpOME, 13R-HpOME(11E), 13S-HpOME(11E), 12R-HpOME(13E), 14R-HpOME(12E), 12S-HpOME(13Z), 10R-HpOME(11Z), 8-HpOME(6E), 9-HpOME(7E), 11-HpOME(9Z), 12-HpOME(10…	LMFA01050451, LMFA01050538, LMFA01050550, LMFA01170029, LMFA01060213, LMFA02000003, LMFA02000097, LMFA02000060, LMFA02000063, LMFA02000067, LMFA02000068, LMFA02000069, LMFA02000070, LMFA02000072, LMFA02000075, LMFA02000076, LMFA02000079, LMFA02000080, LMFA02000081, LMFA02000082, LMFA02000161, LMFA02000162, LMFA02000116, LMFA02000117, LMFA02000119, LMFA02000163, LMFA02000164, LMFA02000225, LMFA020…	1	1	1	1.60984e-05	1.95085e-05	1.36463e-05	3.79302e-05	6.92311e-05	6.63358e-05	-1.81662	0.690261	Octadecanedioic acid	FA
C16H31NO5	M+H	C16H31NO5+H+	318.227	3-hydroxynonanoyl carnitine	HMDB0061635	1	1	1	8.11953e-06	9.54481e-06	6.66836e-06	1.47898e-05	3.58122e-05	3.17152e-05	-1.7583	0.624732	3-hydroxynonanoyl carnitine	FA
C10H20O7P2	M+H	C10H20O7P2+H+	315.076	Geranyl-PP	HMDB0001285	1	1	1	2.27481e-05	5.08203e-05	5.34659e-05	0.000101788	0.000176646	0.000148757	-1.74966	0.736928	Geranyl-PP	PR
C11H12N2O2	M+H	C11H12N2O2+H+	205.097	3-Hydroxymethylantipyrine, D-Tryptophan, (Â±)-Tryptophan, S-nirvanol, Nirvanol, 4-Hydroxyantipyrine	HMDB0013840, HMDB0013609, HMDB0030396, HMDB0060967, HMDB0060533, HMDB0060878	1	1	1	1.4696e-05	4.35427e-05	5.1845e-05	6.82887e-05	0.000129592	0.000162585	-1.71126	0.624732	D-Tryptophan	AA
C11H13NO2	M+NH4	C11H13NO2+NH4+	209.128	5-Methoxytryptophol	HMDB0001896	1	1	1	4.34959e-05	0.000139377	0.000201163	0.000221322	0.000479538	0.000554283	-1.70854	0.624732	5-Methoxytryptophol	PM
C18H35NO4	M+H	C18H35NO4+H+	330.264	4,8 dimethylnonanoyl carnitine, Undecanoylcarnitine	LMFA07070046, LMFA07070110	1	1	1	3.62793e-05	3.16943e-05	4.80836e-05	0.000133951	0.000111699	0.000121875	-1.66301	1.49415	Undecanoylcarnitine	FA
C41H80NO8P	M+H	C41H80NO8P+H+	746.569	PC(15:0/18:1(11Z)), PC(15:0/18:1(9Z)), PC(18:1(11Z)/15:0), PC(18:1(9Z)/15:0), PE(14:0/22:1(13Z)), PE(14:1(9Z)/22:0), PE(16:0/20:1(11Z)), PE(16:1(9Z)/20:0), PE(18:0/18:1(11Z)), PE(18:0/18:1(9Z)), PE(18:1(11Z)/18:0), PE(18:1(9Z)/18:0), PE(20:0/16:1(9Z)), PE(20:1(11Z)/16:0), PE(22:0/14:1(9Z)), PE(22:1(13Z)/14:0), PE-NMe2(16:0/18:1(9Z))	HMDB0007938, HMDB0007939, HMDB0008066, HMDB0008099, HMDB0008842, HMDB0008874, HMDB0008933, HMDB0008965, HMDB0008992, HMDB0008993, HMDB0009024, HMDB0009057, HMDB0009221, HMDB0009253, HMDB0009482, HMDB0009514, HMDB0010568	1	1	1	1.22138e-05	6.98057e-05	6.45084e-05	7.85624e-05	0.000163369	0.000194089	-1.57322	0.624732	PE(36:1)	GP
C20H39NO4	M+H	C20H39NO4+H+	358.295	N-palmitoyl threonine	LMFA08020107	1	1	1	2.83853e-06	4.31559e-06	8.13221e-06	1.3505e-05	1.44389e-05	1.71929e-05	-1.56206	0.905441	N-palmitoyl threonine	FA
C18H32O6	M+NH4	C18H32O6+NH4+	362.254	delta10-13-PhytoF, delta14-10-PhytoF, delta10-12-PhytoF, delta14-9-PhytoF	LMFA02040001, LMFA02040004, LMFA02040002, LMFA02040003	1	1	1	1.7061e-05	2.03599e-05	1.359e-05	5.63001e-05	5.91036e-05	3.1109e-05	-1.52215	0.660026	Glycerol trivalerate	PM
C13H25NO5	M+H	C13H25NO5+H+	276.181	Hydroxyhexanoycarnitine	HMDB0013131	1	1	1	3.05441e-05	4.30312e-05	4.31184e-05	8.61968e-05	0.000132454	0.000110299	-1.49514	0.736928	Hydroxyhexanoycarnitine	FA
C5H12O7P2	M+H	C5H12O7P2+H+	247.013	Dimethylallylpyrophosphate, Isopentenyl pyrophosphate	HMDB0001120, HMDB0001347	1	1	1	1.59404e-05	1.34336e-05	3.19437e-05	6.97385e-05	5.6801e-05	4.43966e-05	-1.47908	0.741418	Dimethylallylpyrophosphate	PR
C17H31NO4	M+H	C17H31NO4+H+	314.233	9-Decenoylcarnitine	HMDB0013205	1	1	1	1.84405e-05	3.26156e-05	1.5924e-05	5.99291e-05	7.48308e-05	4.96258e-05	-1.46092	0.792085	9-Decenoylcarnitine	FA
C14H20N2O3	M+H	C14H20N2O3+H+	265.155	Phenylalanyl-Valine, Valyl-Phenylalanine, (2E)-N-(4-aminobutyl)-3-(4-hydroxy-3-methoxyphenyl)prop-2-enimidic acid, N-(4-aminobutyl)-3-(4-hydroxy-3-methoxyphenyl)prop-2-enimidic acid	HMDB0029008, HMDB0029134, HMDB0139553, HMDB0139638	1	1	1	1.28661e-05	6.90223e-05	0.000102692	0.000103195	0.000173454	0.000213139	-1.40791	0.624732	Phenylalanyl-Valine	PM
C23H34O2	M+NH4	C23H34O2+NH4+	360.29	TrHA, 6Z,8E-tricosdien-4,19-diynoic acid	LMFA01030853, LMFA01031128	1	1	1	5.4667e-05	2.66519e-05	2.67054e-05	0.000202951	3.46849e-05	4.80814e-05	-1.40323	0.318204	TrHA	FA
C22H35NO2	M+H	C22H35NO2+H+	346.274	Eicosapentaenoyl Ethanolamide	HMDB0013649	1	1	1	0.000737355	0.000236345	0.000378787	0.00249856	0.000369402	0.000495535	-1.31435	0.286746	Eicosapentaenoyl Ethanolamide	PM
C15H22N2O3	M+H	C15H22N2O3+H+	279.17	Leucyl-phenylalanine, Isoleucyl-Phenylalanine, Phenylalanyl-Isoleucine, keratan sulfate I	HMDB0013243, HMDB0028914, HMDB0028998, HMDB0062483	1	1	1	8.90557e-06	6.95915e-05	9.04787e-05	7.89866e-05	0.000149702	0.000184507	-1.29001	0.624732	Leucyl-phenylalanine	PM
C12H16N2O3	M+H	C12H16N2O3+H+	237.123	Alanyl-Phenylalanine, Phenylalanyl-Alanine, O-Desmethyl-lacosamide	HMDB0028694, HMDB0028988, HMDB0060855	1	1	1	4.54765e-05	0.000162826	0.000210961	0.000222913	0.000363445	0.000411302	-1.25069	0.660026	Alanyl-Phenylalanine	PM
C23H41NO4	M+H	C23H41NO4+H+	396.311	9,12-Hexadecadienoylcarnitine	HMDB0013334	1	1	1	1.90206e-05	7.28939e-06	1.31785e-05	5.25351e-05	1.47923e-05	2.17481e-05	-1.17359	0.397513	9,12-Hexadecadienoylcarnitine	FA
C11H14N2O3	M+H	C11H14N2O3+H+	223.108	Glycyl-Phenylalanine, Phenylalanyl-Glycine	HMDB0028848, HMDB0028995	1	1	1	3.74732e-05	0.00012547	0.000186904	0.000197847	0.000268727	0.000321089	-1.17085	0.660026	Phenylalanyl-Glycine	PM
C11H13NO3	M+NH4	C11H13NO3+NH4+	225.123	N-Acetyl-L-phenylalanine, 3-Phenylpropionylglycine, Phenylpropionylglycine, N-isopropylterephthalamic acid	HMDB0000512, HMDB0002042, HMDB0000860, HMDB0060608	1	1	1	7.32754e-05	0.000228507	0.000321611	0.000310131	0.000498065	0.000580391	-1.1554	0.624732	N-Acetyl-L-phenylalanine	PM
C22H39NO2	M+H	C22H39NO2+H+	350.305	Anandamide (20:3,n-3), Dihomo-gamma-linolenoyl-EA, Mead Acid-EA	LMFA08040005, LMFA08040011, LMFA08040037	1	1	1	0.000132313	3.51491e-05	5.27848e-05	0.00030595	6.60435e-05	0.000107589	-1.12266	0.329361	Anandamide (20:3,n-3)	FA
C20H35NO2	M+H	C20H35NO2+H+	322.274	Alpha-Linolenoyl ethanolamide	HMDB0013624	1	1	1	0.000691174	0.000340195	0.000441709	0.00205608	0.00050611	0.000598309	-1.10132	0.323394	Alpha-Linolenoyl ethanolamide	FA
C10H17NO4	M+H	C10H17NO4+H+	216.123	2-amino-8-oxo-9,10-epoxy-decanoic acid, Propenoylcarnitine	LMFA01060176, LMFA07070104	1	1	1	4.82583e-05	0.000148891	0.000209176	0.0001612	0.000380703	0.000289207	-1.03241	0.532417	Propenoylcarnitine	FA
C18H24O5S	M+H	C18H24O5S+H+	353.142	Estradiol-17beta 3-sulfate	LMST05020005	1	1	1	2.47599e-05	2.7164e-05	5.54469e-06	6.21949e-05	4.26006e-05	6.43179e-06	-0.952664	0.31456	Estradiol-17beta 3-sulfate	ST
C10H11NO3	M+NH4	C10H11NO3+NH4+	211.108	p-Methylhippuric acid, Phenylacetylglycine, Methyl hippurate, 2-Methylhippuric acid, m-Methylhippuric acid, Methyl n-acetylanthranilate, 4-Hydroxy-5-phenyltetrahydro-1,3-oxazin-2-one, 3-Carbamoyl-2-phenylpropionaldehyde, 4-Anilino-4-oxobutanoic acid	HMDB0013292, HMDB0000821, HMDB0000859, HMDB0011723, HMDB0013245, HMDB0032388, HMDB0060389, HMDB0060366, HMDB0060758	1	1	1	8.47409e-05	0.000379212	0.000498105	0.000376582	0.000642507	0.000790349	-0.911345	0.495853	Phenylacetylglycine	PM
C19H37NO2	M+H	C19H37NO2+H+	312.29	(4E,8E,9Me-d19:2)sphingosine	LMSP01080012	1	1	1	3.88082e-05	2.53124e-05	4.4294e-05	6.1133e-05	5.6992e-05	8.42618e-05	-0.900557	0.697589	(4E,8E,9Me-d19:2)sphingosine	SP
C10H13NO4	M+H	C10H13NO4+H+	212.092	3-Methoxytyrosine, Methyldopa, 3-O-Methyl-a-methyldopa	HMDB0001434, HMDB0011754, HMDB0060747	1	1	1	5.0652e-05	0.000203104	0.00027095	0.000217124	0.000342722	0.000417153	-0.896848	0.529776	3-Methoxytyrosine	PM
C23H38O4	M+H	C23H38O4+H+	379.284	2-Arachidonylglycerol, MG(0:0/20:4(8Z,11Z,14Z,17Z)/0:0), MG(20:4(5Z,8Z,11Z,14Z)/0:0/0:0), MG(20:4(8Z,11Z,14Z,17Z)/0:0/0:0), 1-Acetoxy-2-hydroxy-5,12,15-heneicosatrien-4-one, Persenone A	HMDB0004666, HMDB0011549, HMDB0011578, HMDB0011579, HMDB0035273, HMDB0036568	1	1	1	0.000130902	9.70891e-05	0.000120144	0.000412345	9.64424e-05	0.00013439	-0.88557	0.290388	2-Arachidonylglycerol	GL
C19H32O	M+NH4	C19H32O+NH4+	294.279	5a-Androstan-3b-ol, 3-tridecylphenol, 5-(1-hydroxybutan-2-yl)isolongifol-5-ene, 5-(3-hydroxybutan-2-yl)isolongifol-5-ene, 5-(1-methoxypropan-2-yl)isolongifol-5-ene, 5-(1-hydroxybutan-2-yl)isolongifol-4-ene	LMST02020095, LMPK15010003, LMPR0103500007, LMPR0103500009, LMPR0103500016, LMPR0103500006	1	1	1	4.32396e-05	3.42756e-05	5.23581e-05	7.29343e-05	6.8568e-05	9.47563e-05	-0.863261	0.736928	5a-Androstan-3b-ol	ST
C15H29NO5	M+H	C15H29NO5+H+	304.212	3-hydroxyoctanoyl carnitine	HMDB0061634	1	1	1	1.87892e-05	6.68005e-05	5.5926e-05	4.91848e-05	0.000119834	8.8058e-05	-0.861237	0.460002	3-hydroxyoctanoyl carnitine	FA
C13H25NO4	M+H	C13H25NO4+H+	260.186	O-hexanoyl-R-carnitine, Hexanoylcarnitine	LMFA07070001, LMFA07070070	1	1	1	1.54243e-05	4.79981e-05	4.04733e-05	5.53791e-05	7.80479e-05	5.39983e-05	-0.85118	0.624732	Hexanoylcarnitine	FA
C25H38O4	M+H	C25H38O4+H+	403.284	7b-Hydroxy-3-oxo-5b-cholanoic acid, MG(0:0/22:6(4Z,7Z,10Z,13Z,16Z,19Z)/0:0), MG(22:6(4Z,7Z,10Z,13Z,16Z,19Z)/0:0/0:0)	HMDB0000541, HMDB0011557, HMDB0011587	1	1	1	4.62755e-05	5.0929e-05	3.05098e-05	0.0001416	4.3946e-05	4.18176e-05	-0.832081	0.294611	MG(22:6)	GL
C21H40O4	M+H	C21H40O4+H+	357.3	MG(0:0/18:1(11Z)/0:0), MG(0:0/18:1(9Z)/0:0), MG(18:1(11Z)/0:0/0:0), MG(18:1(9Z)/0:0/0:0), Stearoyllactic acid, 3-(2-Heptenyloxy)-2-hydroxypropyl undecanoate	HMDB0011536, HMDB0011537, HMDB0011566, HMDB0011567, HMDB0033372, HMDB0034031	1	1	1	0.000246098	0.000195638	0.00018086	0.000553052	0.000270561	0.000284633	-0.831912	0.459654	MG(18:1)	GL
C11H15N2O8P	M+H	C11H15N2O8P+H+	335.064	Nicotinamide ribotide	HMDB0000229	1	1	1	6.64276e-05	3.00398e-05	0.000177423	0.000191538	7.27267e-05	0.000222648	-0.830064	0.359267	Nicotinamide ribotide, NMN	PM
C12H24N2O3	M+H	C12H24N2O3+H+	245.186	Isoleucyl-Isoleucine, Isoleucyl-Leucine, Leucyl-Isoleucine, Leucyl-Leucine	HMDB0028910, HMDB0028911, HMDB0028932, HMDB0028933	1	1	1	0.000234503	0.000324441	0.000242041	0.000390382	0.000614315	0.000395218	-0.805492	0.624732	Isoleucyl-Leucine	PM
C21H32O2	M+NH4	C21H32O2+NH4+	334.274	Calusterone, Bolasterone, 5beta-pregnane-3,20-dione, Pregnenolone, 6Z,9Z,12Z,15Z,18Z-heneicosapentaenoic acid, 20-hydroxypregn-4-en-3-one, (20R)-20-hydroxypregn-4-en-3-one, (20S)-20-hydroxypregn-4-en-3-one, 5alpha-pregnane-3,20-dione, Ethyltestosterone	LMST02020010, LMST02020017, LMST02030146, LMST02030088, LMFA01030823, LMST02030152, LMST02030153, LMST02030169, LMST02030170, LMST02030201	1	1	1	2.62812e-05	2.26872e-05	1.8932e-05	8.68145e-05	1.20911e-05	1.60427e-05	-0.759492	0.179782	Pregnenolone	ST
C10H19NO3	M+H	C10H19NO3+H+	202.144	Capryloylglycine, Valproylglycine	HMDB0000832, HMDB0013116	1	1	1	0.00025852	0.000390528	0.000287662	0.000459324	0.000666007	0.000404677	-0.707864	0.624732	Valproylglycine	PM
C30H54NO7P	M+NH4	C30H54NO7P+NH4+	589.398	PC(22:4(7Z,10Z,13Z,16Z)/0:0)	LMGP01050124	1	1	1	0.000200787	0.000115579	0.000111052	0.000318717	0.000227047	0.000152054	-0.707202	0.460002	PC(22:4)	GP
C12H22O4	M+NH4	C12H22O4+NH4+	248.186	Bis(1-methylethyl) hexanedioate, Dodecanedioic acid, Dipropyl hexanedioate	LMFA07010790, LMFA01170009, LMFA07010841	1	1	1	0.000190728	0.000143573	0.000140125	0.00033565	0.00022707	0.000208938	-0.701781	0.624732	Dodecanedioic acid	FA
C11H13NO3	M+H	C11H13NO3+H+	208.097	N-Acetyl-L-phenylalanine, 3-Phenylpropionylglycine, Phenylpropionylglycine, N-isopropylterephthalamic acid	HMDB0000512, HMDB0002042, HMDB0000860, HMDB0060608	1	1	1	8.91336e-05	0.000218337	0.000335399	0.000231211	0.000372582	0.0004325	-0.688833	0.442767	N-Acetyl-L-phenylalanine	PM
C6H12O9S	M+H	C6H12O9S+H+	261.027	{[2,3,4-trihydroxy-5-(hydroxymethyl)oxolan-2-yl]methoxy}sulfonic acid, {[3,4,5-trihydroxy-5-(hydroxymethyl)oxolan-2-yl]methoxy}sulfonic acid, [4,5-dihydroxy-2,5-bis(hydroxymethyl)oxolan-3-yl]oxidanesulfonic acid, [2,4-dihydroxy-2,5-bis(hydroxymethyl)oxolan-3-yl]oxidanesulfonic acid	HMDB0125613, HMDB0125614, HMDB0125615, HMDB0125616	1	1	1	6.15568e-06	2.61954e-05	2.44387e-05	2.53552e-05	3.1345e-05	2.94733e-05	-0.601614	0.423694	D-Galactose 6-sulfate	PM
C11H19NO4	M+H	C11H19NO4+H+	230.139	Butenylcarnitine	LMFA07070053	1	1	1	7.5179e-05	0.000163195	0.000214802	0.000193583	0.000243258	0.000232879	-0.563486	0.460002	Butenylcarnitine	FA
C9H18NO8P	M+H	C9H18NO8P+H+	300.084	D-4'-Phosphopantothenate	HMDB0001016	1	1	1	1.43685e-05	3.31272e-05	2.78302e-05	4.40632e-05	4.44313e-05	2.11172e-05	-0.541182	0.381134	D-4'-Phosphopantothenate	PM
C18H18O7	M+H	C18H18O7+H+	347.113	Hamilcone, 5,2'-Dihydroxy-6,7,6'-trimethoxyflavanone, 5,2'-Dihydroxy-7,8,6'-trimethoxyflavanone, 2,8-Dihydroxy-3,9,10-trimethoxypterocarpan, Amorphaquinone, 2',6'-Dihydroxy-4,3'-dimethoxy-4',5'-methylenedioxydihydrochalcone, 5,2'-Dihydroxy-7,4',5'-trimethoxyflavanone, 5,3'-Dihydroxy-6,7,4'-trimethoxyflavanone, Agestricin D, 5,3'-Dihydroxy-7,8,4'-trimethoxyflavanone, 5,6-Dihydroxy-7,8,4'-trimethox…	LMPK12120349, LMPK12140601, LMPK12140645, LMPK12070070, LMPK12080054, LMPK12120565, LMPK12140536, LMPK12140626, LMPK12140627, LMPK12140673, LMPK12140683, LMPK12140684	1	1	1	3.88244e-05	0.00030192	0.000154078	2.42494e-05	0.000513332	0.000174185	-0.524495	0.119818	C18 Ceramide	SP
C9H17NO4	M+H	C9H17NO4+H+	204.123	L-Acetylcarnitine	HMDB0000201	1	1	1	0.000219394	0.000280839	0.000303118	0.000466873	0.000323233	0.000365169	-0.524136	0.624732	L-Acetylcarnitine	FA
C11H22N2O3	M+H	C11H22N2O3+H+	231.17	Isoleucyl-Valine, Leucyl-Valine, Valyl-Isoleucine, Valyl-Leucine	HMDB0028920, HMDB0028942, HMDB0029130, HMDB0029131	1	1	1	0.000227742	0.000207507	0.000157396	0.000349588	0.000293223	0.000184636	-0.481499	0.434688	Isoleucyl-Valine	PM
C7H12N2O5	M+H	C7H12N2O5+H+	205.082	L-beta-aspartyl-L-alanine, gamma-Glutamylglycine, Alanyl-Aspartic acid, Aspartyl-Alanine, Glutamylglycine	HMDB0011162, HMDB0011667, HMDB0028683, HMDB0028746, HMDB0028819	1	1	1	0.000119596	0.000157285	0.000206238	0.00031474	0.000155291	0.000194808	-0.460626	0.3498	Aspartyl-Alanine	PM
C11H21NO5	M+H	C11H21NO5+H+	248.149	3-hydroxybutyrylcarnitine, Hydroxybutyrylcarnitine	LMFA07070037, LMFA07070071	1	1	1	6.37647e-05	0.000122491	0.000140054	0.00013151	0.000170653	0.000132457	-0.413509	0.423694	Hydroxybutyrylcarnitine	FA
C13H15NO2	M+H	C13H15NO2+H+	218.118	N-desisopropylpropranolol	HMDB0060961	1	1	1	4.01742e-05	0.000123127	0.000132015	7.60875e-05	0.000143046	0.000168601	-0.39281	0.245579	N-desisopropylpropranolol	PM
C11H21NO3	M+H	C11H21NO3+H+	216.159	N-Nonanoylglycine	HMDB0013279	1	1	1	0.000170253	0.000214103	0.000189858	0.000178713	0.000332676	0.000220952	-0.350926	0.329361	N-Nonanoylglycine	PM
C43H78NO8P	M+H	C43H78NO8P+H+	768.554	PC(15:0/20:4(5Z,8Z,11Z,14Z)), PC(15:0/20:4(8Z,11Z,14Z,17Z)), PC(20:4(5Z,8Z,11Z,14Z)/15:0), PC(20:4(8Z,11Z,14Z,17Z)/15:0), PE(16:0/22:4(7Z,10Z,13Z,16Z)), PE(16:1(9Z)/20:3(8Z,11Z,14Z)), PE(18:0/20:4(5Z,8Z,11Z,14Z)), PE(18:0/20:4(8Z,11Z,14Z,17Z)), PE(18:1(11Z)/20:3(5Z,8Z,11Z)), PE(18:1(11Z)/20:3(8Z,11Z,14Z)), PE(18:1(9Z)/20:3(5Z,8Z,11Z)), PE(18:1(9Z)/20:3(8Z,11Z,14Z)), PE(18:2(9Z,12Z)/20:2(11Z,14Z))…	HMDB0007949, HMDB0007950, HMDB0008428, HMDB0008461, HMDB0008943, HMDB0008969, HMDB0009003, HMDB0009004, HMDB0009034, HMDB0009035, HMDB0009067, HMDB0009068, HMDB0009099, HMDB0009131, HMDB0009164, HMDB0009196, HMDB0009228, HMDB0009259, HMDB0009260, HMDB0009291, HMDB0009322, HMDB0009323, HMDB0009355, HMDB0009356, HMDB0009387, HMDB0009420, HMDB0009583	1	1	1	8.76341e-06	2.96137e-05	2.20642e-05	1.82312e-05	2.28464e-05	3.59944e-05	-0.35067	0.21424	PE(38:4)	GP
C28H52NO7P	M+NH4	C28H52NO7P+NH4+	563.382	LysoPC(20:3(5Z,8Z,11Z)), LysoPC(20:3(8Z,11Z,14Z))	HMDB0010393, HMDB0010394	1	1	1	0.00146519	0.00135431	0.00109136	0.0020726	0.00178899	0.00108426	-0.338731	0.329361	PC(20:3)	GP
C22H37NO2	M+H	C22H37NO2+H+	348.29	Anandamide-d4 (20:4,n-6), Anandamide (20:4,n-6), Arachidonoyl-EA(d8), Virodhamine	LMFA08040056, LMFA08040001, LMFA08040044, LMFA00000014	1	1	1	5.9295e-05	1.02363e-05	3.30459e-05	7.99345e-05	1.46863e-05	2.55177e-05	-0.227989	0.0475619	Anandamide (20:4,n-6)	FA
C26H48NO7P	M+NH4	C26H48NO7P+NH4+	535.351	PC(18:3(9Z,12Z,15Z)/0:0), PC(18:3(6Z,9Z,12Z)/0:0)	LMGP01050038, LMGP01050128	1	1	1	4.51692e-05	3.14206e-05	5.28236e-05	4.43223e-05	5.04723e-05	5.17553e-05	-0.179405	0.261261	PC(18:3)	GP
C22H32O2	M+H	C22H32O2+H+	329.248	Docosahexaenoic acid, Neogrifolin, Grifolin, Retinol acetate	HMDB0002183, HMDB0030053, HMDB0030446, HMDB0035185	1	1	1	0.00216921	0.000719358	0.00111182	0.00342876	0.000402893	0.000678716	-0.173104	0.0346829	Docosahexaenoic acid	FA
C18H32O	M+H	C18H32O+H+	265.253	9Z,12Z-Octadecadienal, 11E,14E-Octadecadienal, 2E,13Z-Octadecadienal, 3Z,13Z-Octadecadienal, 6S,7R-Epoxy-3Z,9Z-octadecadiene, 3,4-Epoxy-6,9-octadecadiene, 5-(1-hydroxypropan-2-yl)isolongifolane, 9,12,15-Octadecatrien-1-ol, 9,12-octadecadienal, 3E,13Z-Octadecadienal, 11Z,13Z-Octadecadienal, 13Z,15Z-Octadecadienal, 9S,10R-Epoxy-6Z-octadecene	LMFA06000242, LMFA06000233, LMFA06000234, LMFA06000241, LMFA12000287, LMFA12000288, LMPR0103500010, LMFA05000216, LMFA06000101, LMFA06000235, LMFA06000239, LMFA06000240, LMFA12000284	1	1	1	0.000784573	0.000398358	0.000441095	0.000980574	0.000335591	0.000465313	-0.133499	0.0463867	(z)-9,17-octadecadienal	PM
C20H30O	M+H	C20H30O+H+	287.237	Vitamin A, 11-cis-Retinol, 9-cis-Retinol, 13-cis Retinol, (x)-p-Menth-1-en-4-yl 5-isopropyl-2-methylphenyl ether, Abietinal, ent-16-Kauren-19-al, ent-19-Trachylobanal, 8,13-Abietadien-18-al	HMDB0000305, HMDB0006216, HMDB0006217, HMDB0006221, HMDB0030403, HMDB0034735, HMDB0036728, HMDB0036841, HMDB0038709	1	1	1	0.000815229	0.000389393	0.00050408	0.00114374	0.000233738	0.000349044	-0.0149695	0.00605815	Vitamin A	PR
C24H38O2	M+H	C24H38O2+H+	359.294	Tetracosapentaenoic acid (24:5n-6), Tetracosapentaenoic acid (24:5n-3)	HMDB0006322, HMDB0006323	1	1	1	1.02152e-05	4.09488e-06	3.57611e-06	7.04986e-06	4.65022e-06	6.36388e-06	-0.0142649	0.00605815	Tetracosapentaenoic acid (24:5n-6)	PM
C24H38O5	M+H	C24H38O5+H+	407.279	7-Ketodeoxycholic acid, 3,7-Dihydroxy-12-oxocholanoic acid, Annocherin A, (6b,7b,13R)-6,7-Diacetoxy-8,14-labdadiene-13-ol, 7alpha,12alpha-dihydroxy-3-oxo-5beta-cholan-24-oic Acid	HMDB0000391, HMDB0000400, HMDB0033399, HMDB0035288, HMDB0062680	1	1	1	2.68991e-05	1.11475e-05	1.98513e-05	4.86413e-05	1.89437e-06	4.75949e-06	0.0663555	0.0112031	3-Oxocholic acid	FA
C11H17NO6	M+H	C11H17NO6+H+	260.113	Fumarycarnitine, Osmaronin	HMDB0013134, HMDB0032769	1	1	1	4.69135e-05	6.14075e-05	0.00010055	5.69281e-05	5.46037e-05	8.7261e-05	0.07135	0.0377264	Fumarycarnitine	FA
C20H39NO2	M+H	C20H39NO2+H+	326.305	N-Oleoylethanolamine	HMDB0002088	1	1	1	2.96493e-05	7.18182e-05	0.000130148	6.19447e-05	7.1693e-05	8.62016e-05	0.0752845	0.0298683	N-Oleoylethanolamine	FA
C22H36O2	M+H	C22H36O2+H+	333.279	5Z,13Z,16Z,19Z-Docosatetraenoic acid, 8,12,16,19-docosatetraenoic acid, 22:4(7Z,13Z,16Z,19Z), 3,7,11,15-Tetramethyl-2E,6E,10E,14-hexadecatetraenyl acetate, 10-[3]-ladderane-decanoic acid, Adrenic acid, 22:4(4Z,7Z,10Z,13E), 4,7,10,13-docosatetraenoic acid, Adrenic Acid	LMFA04000087, LMFA01030179, LMFA04000063, LMFA07010351, LMFA01140012, LMFA04000050, LMFA04000066, LMFA01030177, LMFA01030178	1	1	1	0.000469933	0.000109335	0.000187295	0.000574693	4.01082e-05	9.70762e-05	0.106775	0.0206127	Adrenic acid	FA
C9H16O4	M+NH4	C9H16O4+NH4+	206.139	cis- and trans-Ethyl 2,4-dimethyl-1,3-dioxolane-2-acetate, (+/-)-Ethyl 3-acetoxy-2-methylbutyrate, (+/-)-Methyl 5-acetoxyhexanoate, 3-Methylsubericacid, Azelaic acid	LMFA07010803, LMFA07010695, LMFA07010697, LMFA01030981, LMFA01170054	1	1	1	0.000197293	0.000365797	0.000405374	0.00031808	0.000294726	0.000278657	0.119521	0.0984797	Azelaic acid	FA
C20H32O2	M+H	C20H32O2+H+	305.248	Arachidonic acid, Cis-8,11,14,17-Eicosatetraenoic acid, Mesterolone, Sideridiol, ent-17-Hydroxy-16beta-kauran-19-al, Yucalexin P21, Copalic acid, Junicedral, 7,13-Eperudien-15-oic acid, Oryzalexin S, Oryzalexin E	HMDB0001043, HMDB0002177, HMDB0006036, HMDB0036702, HMDB0036721, HMDB0036754, HMDB0036829, HMDB0036830, HMDB0037824, HMDB0039687, HMDB0039702	1	1	1	0.00491365	0.00188969	0.00266957	0.00647171	0.00079211	0.00141251	0.126721	0.0298683	Arachidonic acid	FA
C12H21NO4	M+H	C12H21NO4+H+	244.154	2-ethylacryloylcarnitine, Tiglylcarnitine	LMFA07070030, LMFA07070108	1	1	1	7.147e-05	0.000115418	0.00013489	0.000107889	9.48366e-05	8.83374e-05	0.144738	0.143362	Tiglylcarnitine	FA
C10H9N5O	M+H	C10H9N5O+H+	216.088	Kinetin	HMDB0012245	1	1	1	0.000301901	0.000149557	0.000199777	0.00010829	0.000201521	0.000231452	0.266847	0.192109	Kinetin	PM
C20H34O2	M+H	C20H34O2+H+	307.263	8,11,14-Eicosatrienoic acid, 5,8,11-Eicosatrienoic acid, Sciadonic acid, Sagittariol, 11,14,17-Eicosatrienoic acid	HMDB0002925, HMDB0010378, HMDB0031058, HMDB0036835, HMDB0060039	1	1	1	0.000314135	0.000171769	0.000210303	0.000207126	0.000107501	0.00014439	0.600966	0.460002	11,14,17-eicosatrienoic acid	FA
C11H10O4	M+H	C11H10O4+H+	207.065	Isoeugenitol, Eugenitol, Vinyl caffeate, 1-(6-hydroxy-4-methoxy-1-benzofuran-5-yl)ethan-1-one, 6-(hydroxymethyl)-7-methoxy-2H-chromen-2-one	HMDB0029472, HMDB0029466, HMDB0029775, HMDB0129368, HMDB0136784	1	1	1	0.0001184	0.000253147	0.000339019	0.000143972	0.000103618	0.000143328	0.862099	0.442767	Isoeugenitol	PM
C20H30O2	M+H	C20H30O2+H+	303.232	Eicosapentaenoic acid, Retinyl ester, 8,15-Isopimaradien-18-oic acid, Siderone, Yucalexin B14, Yucalexin A16, 8(17),12-Labdadiene-15,16-dial, Isopimaric acid, Cascarillone, 8,13-Abietadien-18-oic acid, (ent-15beta,16beta)-15,16-Epoxy-3-kauranone, ent-8(17),13(16),14-Labdatrien-18-oic acid	HMDB0001999, HMDB0003598, HMDB0035692, HMDB0036703, HMDB0036709, HMDB0036775, HMDB0036805, HMDB0036811, HMDB0036826, HMDB0038172, HMDB0038687, HMDB0039486	1	1	1	0.000318347	0.000172191	0.000243081	0.00026775	4.47026e-05	8.92609e-05	0.868865	0.423694	Eicosapentaenoic acid	FA
C11H21NO3	M+NH4	C11H21NO3+NH4+	233.186	N-Nonanoylglycine	HMDB0013279	1	1	1	0.000157614	0.00088904	0.000930543	0.000200739	0.000424607	0.000348887	1.02112	0.369885	N-Nonanoylglycine	PM
C10H19NO4	M+H	C10H19NO4+H+	218.139	Propionylcarnitine, O-propanoyl-carnitine	HMDB0000824, HMDB0062514	1	1	1	0.000128501	0.00118981	0.00131141	0.000194125	0.000522005	0.000511278	1.09929	0.351726	O-propanoyl-carnitine	FA
C20H37NO2	M+H	C20H37NO2+H+	324.29	Linoleoyl ethanolamide	HMDB0012252	1	1	1	6.95108e-05	0.000204942	0.000395533	8.48149e-05	8.16335e-05	0.000136305	1.14599	0.359321	Linoleoyl ethanolamide	FA
C11H12O5	M+H	C11H12O5+H+	225.076	Elenolide, Sinapic acid, 3-(3-hydroxy-4,5-dimethoxyphenyl)prop-2-enoic acid, 3-(4,5-dihydroxy-2,3-dimethoxyphenyl)prop-2-enal, 3-(6-hydroxy-7-methoxy-2H-1,3-benzodioxol-5-yl)propanal, 3-(7-hydroxy-6-methoxy-2H-1,3-benzodioxol-5-yl)propanal, 6-(3-hydroxyprop-1-en-1-yl)-4-methoxy-2H-1,3-benzodioxol-5-ol, 6-(3-hydroxyprop-1-en-1-yl)-5-methoxy-2H-1,3-benzodioxol-4-ol, 3-(4-hydroxy-3,5-dimethoxyphenyl…	HMDB0030018, HMDB0032616, HMDB0141325, HMDB0128665, HMDB0128667, HMDB0128668, HMDB0128673, HMDB0128674, HMDB0127488, HMDB0128183, HMDB0140920, HMDB0142075, HMDB0142169, HMDB0142170, HMDB0142171, HMDB0142172, HMDB0142173, HMDB0142174	1	1	1	0.000127241	0.000250953	0.000340318	0.000126831	7.72474e-05	9.57028e-05	1.2611	0.549436	Elenolide, Sinapic acid	PM
C10H10O5	M+H	C10H10O5+H+	211.06	Vanilpyruvic acid, 3-(4-hydroxy-3-methoxyphenyl)oxirane-2-carboxylic acid, (2E)-3-(2,4-dihydroxy-3-methoxyphenyl)prop-2-enoic acid, (2E)-3-(2,4-dihydroxy-5-methoxyphenyl)prop-2-enoic acid, 3-(3,4-dihydroxy-5-methoxyphenyl)prop-2-enoic acid, 3-(2,4-dihydroxy-5-methoxyphenyl)prop-2-enoic acid, 3-(2,4-dihydroxy-3-methoxyphenyl)prop-2-enoic acid, 3-(2,3-dihydroxy-4-methoxyphenyl)prop-2-enoic acid, 3-…	HMDB0011714, HMDB0125516, HMDB0125515, HMDB0125514, HMDB0127490, HMDB0127946, HMDB0127947, HMDB0132221, HMDB0132228, HMDB0140909, HMDB0141258, HMDB0141331, HMDB0142176, HMDB0142177, HMDB0142178, HMDB0142180, HMDB0142181	1	1	1	0.000223886	0.000542916	0.000556746	0.000275902	8.70339e-05	0.000102939	1.5064	0.624732	Vanilpyruvic acid	PM
C12H14O7	M+H	C12H14O7+H+	271.081	Phenylglucuronide, Phenol glucuronide, 3,4,5-trihydroxy-6-phenoxyoxane-2-carboxylic acid	HMDB0059806, HMDB0060014, HMDB0135168	1	1	1	0.000502058	0.000528939	0.000480995	0.000306674	7.92441e-05	0.000100823	1.63523	0.697589	Phenylglucuronide	PM
C22H34O2	M+H	C22H34O2+H+	331.263	Docosapentaenoic acid (22n-6), Docosapentaenoic acid, Ethyl abietate, ent-16-Kauren-19-ol acetate, 4,8,12,15,19-Docosapentaenoic acid, Ethyl icosapentate	HMDB0001976, HMDB0006528, HMDB0032257, HMDB0035024, HMDB0039133, HMDB0039530	1	1	1	0.000193849	6.40462e-05	0.000118902	8.45012e-05	9.56756e-06	2.10186e-05	1.71106	0.575229	Docosapentaenoic acid	FA
C11H19N3O6S	M+H	C11H19N3O6S+H+	322.107	L-L-Homoglutathione	HMDB0029395	1	1	1	0.00914139	0.00300166	0.00695358	0.00329942	0.000837149	0.00107506	1.87351	0.624732	L-L-Homoglutathione	PM
C9H18N2O4	M+H	C9H18N2O4+H+	219.134	Isoleucyl-Serine, Leucyl-Serine, Serylisoleucine, Serylleucine, Threoninyl-Valine, Valyl-Threonine	HMDB0028916, HMDB0028938, HMDB0029042, HMDB0029043, HMDB0029074, HMDB0029137	1	1	1	0.000498195	0.00500407	0.00272404	0.000412939	0.000636703	0.000250542	2.66153	0.459654	Isoleucyl-Serine	PM
C12H20O6	M+H	C12H20O6+H+	261.133	Glycerol tripropanoate	HMDB0032857	1	1	1	0.000409013	0.000762487	0.000800969	0.000199836	4.47715e-05	6.22429e-05	2.6844	0.730554	Glycerol tripropanoate	PM
C20H33NO2	M+H	C20H33NO2+H+	320.258	N-hydroxy arachidonoyl amine, Anandamide (18:4,n-3)	LMFA08020029, LMFA08040006	1	1	1	1.31613e-05	8.15381e-06	1.7089e-05	3.36774e-06	1.55994e-06	6.26518e-07	2.78961	0.697589	N-hydroxy arachidonoyl amine	FA
C34H62O2	M+NH4	C34H62O2+NH4+	520.509	Linolenyl palmitate, Palmitoleyl linoleate, Palmityl linolenate, Linoleyl palmitatoleate	LMFA07010122, LMFA07010124, LMFA07010125, LMFA07010123	1	1	1	7.2868e-05	0.00013318	0.000217527	8.48703e-07	8.95179e-06	1.10358e-05	4.34544	0.624732	Linolenyl palmitate	FA
C49H76O2	M+NH4	C49H76O2+NH4+	714.618	CE(22:6(4Z,7Z,10Z,13Z,16Z,19Z))	HMDB0006733	1	1	1	2.60063e-05	1.90912e-05	2.30235e-05	0	0	6.9314e-07	6.61881	0.905441	CE(22:6)	ST
C22H37NO	M+H	C22H37NO+H+	332.295	N-ethyl arachidonoyl amine, N,N-dimethyl arachidonoyl amine	LMFA08020006, LMFA08020023	1	1	1	0	0	0	3.80326e-06	8.10942e-06	8.59427e-06	Only in Lesion	0.697439	N,N-dimethyl arachidonoyl amine	FA
C11H20N2O4	M+H	C11H20N2O4+H+	245.15	Isoleucyl-Hydroxyproline, Hydroxyprolyl-Isoleucine, Hydroxyprolyl-Leucine, Leucyl-Hydroxyproline	HMDB0028908, HMDB0028866, HMDB0028867, HMDB0028930	0	1	1	0.000162091	0.000153254	0.000176347	0.000181118	0.000200632	0.000187351	-0.21093	0.697589	Isoleucyl-Hydroxyproline	PM
C41H76O5	M+NH4	C41H76O5+NH4+	666.603	DG(18:0/20:2(11Z,14Z)/0:0)[iso2], DG(17:2(9Z,12Z)/21:0/0:0)[iso2], DG(16:0/22:2(13Z,16Z)/0:0)[iso2], DG(19:1(9Z)/19:1(9Z)/0:0), DG(18:2(9Z,12Z)/20:0/0:0)[iso2], DG(18:1(9Z)/20:1(11Z)/0:0)[iso2], DG(16:1(9Z)/22:1(13Z)/0:0)[iso2]	LMGL02010091, LMGL02010123, LMGL02010127, LMGL02010330, LMGL02010089, LMGL02010090, LMGL02010115	1	0	1	1.15748e-06	1.24545e-06	0	9.3065e-07	1.29155e-05	7.67646e-06	-3.16298	0.460002	DG(38:2)	GL
C41H78O5	M+NH4	C41H78O5+NH4+	668.619	DG(14:0/24:1(15Z)/0:0), DG(14:1(9Z)/24:0/0:0), DG(16:0/22:1(13Z)/0:0), DG(16:1(9Z)/22:0/0:0), DG(18:0/20:1(11Z)/0:0), DG(18:1(11Z)/20:0/0:0), DG(18:1(9Z)/20:0/0:0), DG(20:0/18:1(11Z)/0:0), DG(20:0/18:1(9Z)/0:0), DG(20:1(11Z)/18:0/0:0), DG(22:0/16:1(9Z)/0:0), DG(22:1(13Z)/16:0/0:0), DG(24:0/14:1(9Z)/0:0), DG(24:1(15Z)/14:0/0:0), DG(20:0/0:0/18:1n7), DG(20:0/0:0/18:1n9), DG(16:0/0:0/22:1n9), DG(22:…	HMDB0007036, HMDB0007064, HMDB0007116, HMDB0007144, HMDB0007166, HMDB0007194, HMDB0007223, HMDB0007362, HMDB0007363, HMDB0007390, HMDB0007592, HMDB0007620, HMDB0007792, HMDB0007820, HMDB0056067, HMDB0056068, HMDB0056020, HMDB0056090, HMDB0056044, HMDB0055966, HMDB0056112	1	0	1	4.37053e-06	8.50718e-07	0	7.04934e-07	1.70681e-05	7.70602e-06	-2.28684	0.397513	DG(38:1)	GL
C37H70O5	M+NH4	C37H70O5+NH4+	612.556	DG(17:0/17:1(9Z)/0:0)[iso2], DG(16:0/18:1(11Z)/0:0), DG(14:0/20:1(11Z)/0:0)[iso2], DG(15:1(9Z)/19:0/0:0)[iso2], DG(18:1(9Z)/16:0/0:0), DG(16:0/18:1(9Z)/0:0), DG(16:1(9Z)/18:0/0:0)[iso2], DG(18:1(11E)/16:0/0:0), DG(12:0/22:1(11Z)/0:0)[iso2], DG(14:1(9Z)/20:0/0:0)[iso2]	LMGL02010018, LMGL02010307, LMGL02010389, LMGL02010459, LMGL02010005, LMGL02010006, LMGL02010023, LMGL02010004, LMGL02010348, LMGL02010412	1	0	1	1.01627e-05	5.58691e-06	1.08373e-06	1.34543e-05	2.26911e-05	1.47877e-05	-1.59728	0.697589	DG(34:1)	GL
C12H22O11	M+H	C12H22O11+H+	343.123	D-Maltose, Alpha-Lactose, Trehalose, Isomaltose, Galactinol, 3-b-Galactopyranosyl glucose, Epimelibiose, Kojibiose, Turanose, Neotrehalose, Inulobiose, Galabiose, Maltulose, Mannobiose, 2-{[3,4-dihydroxy-2,5-bis(hydroxymethyl)oxolan-2-yl]oxy}-6-(hydroxymethyl)oxane-3,4,5-triol, 6-({[3,4,5-trihydroxy-6-(hydroxymethyl)oxan-2-yl]oxy}methyl)oxane-2,3,4,5-tetrol	HMDB0000163, HMDB0000186, HMDB0000975, HMDB0002923, HMDB0005826, HMDB0006603, HMDB0006792, HMDB0011742, HMDB0011740, HMDB0029880, HMDB0029898, HMDB0029902, HMDB0029919, HMDB0029933, HMDB0125600, HMDB0133305	1	0	1	0.000624142	2.7795e-05	3.16779e-05	4.47684e-05	1.18177e-05	1.14441e-05	3.32894	0.301947	D-Maltose/Trehalose	PM
C18H32O2	M+H	C18H32O2+H+	281.248	Linoleic acid, Bovinic acid, 9E,11E-Octadecadienoic acid, 10E,12Z-Octadecadienoic acid, Linoelaidic acid, Mangiferic acid, Linalyl caprylate, Ethyl 2E,4Z-hexadecadienoate, 5-Octadecynoic acid, Dihomolinoleic acid, 6Z,9Z-octadecadienoic acid, Octadecadienoate	HMDB0000673, HMDB0003797, HMDB0005047, HMDB0005048, HMDB0006270, HMDB0029800, HMDB0030430, HMDB0031051, HMDB0031097, HMDB0061864, HMDB0062238, HMDB0062784	0	0	1									Linoleic acid	FA
C19H40O3	M+H	C19H40O3+H+	317.305	1-Hexadecylglycerol, 1,2,4-Nonadecanetriol	LMGL01020032, LMFA05000577	0	0	1									1-Hexadecylglycerol	GL
C21H42O3	M+H	C21H42O3+H+	343.321	MG(P-18:0e/0:0/0:0), Propylene glycol stearate	HMDB0011153, HMDB0029764	0	0	1									MG(P-18/0)	GL
C18H32O16	M+H	C18H32O16+H+	505.176	Maltotriose, Levan, 3-Galactosyllactose, Dextrin, 1-Kestose, Melezitose, Neokestose, Galactotriose, Nephritogenoside	HMDB0001262, HMDB0003539, HMDB0006599, HMDB0006857, HMDB0011729, HMDB0011730, HMDB0029921, HMDB0029922, HMDB0041948	0	0	1									3-Galactosyllactose	PM
C9H14O6	M+NH4	C9H14O6+NH4+	236.113	Triacetin	LMGL03012615	0	0	1									Triacetin (Glycerol Triactetate)	GL
C18H34O2	M+H	C18H34O2+H+	283.263	Oleic acid, Elaidic acid, Vaccenic acid, (Z)-13-Octadecenoic acid, Ethyl 9-hexadecenoate, (E)-13-Octadecenoic acid, 7Z-octadecenoic acid, Octadec-9-enoic Acid	HMDB0000207, HMDB0000573, HMDB0003231, HMDB0041480, HMDB0059871, HMDB0062218, HMDB0062242, HMDB0062703	0	0	1									Oleic acid, Elaidic acid, Vaccenic acid	FA
C18H37NO2	M+H	C18H37NO2+H+	300.29	Sphingosine, 3-Dehydrosphinganine, Palmitoylethanolamide	HMDB0000252, HMDB0001480, HMDB0002100	0	0	1									Palmitoylethanolamide	FA
C24H36O2	M+H	C24H36O2+H+	357.279	Tetracosahexaenoic acid, Tetracosahexaenoic acid,n-3	HMDB0002007, HMDB0060117	0	0	1									Tetracosahexaenoic acid	FA
C23H40O4	M+H	C23H40O4+H+	381.3	MG(0:0/20:3(11Z,14Z,17Z)/0:0), MG(0:0/20:3(5Z,8Z,11Z)/0:0), MG(0:0/20:3(8Z,11Z,14Z)/0:0), MG(20:3(11Z,14Z,17Z)/0:0/0:0), MG(20:3(5Z,8Z,11Z)/0:0/0:0), MG(20:3(8Z,11Z,14Z)/0:0/0:0), Isopersin, 2-Hydroxy-4-oxo-5,12-heneicosadien-1-yl acetate, Persin	HMDB0011545, HMDB0011546, HMDB0011547, HMDB0011575, HMDB0011576, HMDB0011577, HMDB0032735, HMDB0039403, HMDB0041103	0	0	1									MG(20:3)	GL
C25H37NO2	M+H	C25H37NO2+H+	384.29	Macamide	LMFA08020160	0	0	1									Macamide	FA
C23H45NO4	M+H	C23H45NO4+H+	400.342	L-Palmitoylcarnitine	HMDB0000222	0	0	1									L-Palmitoylcarnitine	FA
C27H46O	M+NH4	C27H46O+NH4+	404.389	5alpha-cholestanone, cholest-5-en-3alpha-ol, Cholesterol(d7), Zymostenol, cholest-8(14)-en-3beta-ol, 5alpha-cholest-22E-en-3beta-ol, 5beta-cholestanone, Furostane skeleton, Zymostenol-d7, Cholesterol, 15-dehydro-A-norcholestanol, Lathosterol, Patinosterol, 5beta-cholest-22E-en-3beta-ol, 4-cholestenol, dihydrotachysterol3 / (5E)-(10S)-10,19-dihydrovitamin D3 / (5E)-(10S)-10,19-dihydrocholecalcifer…	LMST01010174, LMST01010081, LMST01010093, LMST01010096, LMST01010097, LMST01010099, LMST01010205, LMST01070000, LMST01010365, LMST01010001, LMST01010290, LMST01010089, LMST01010316, LMST01010333, LMST01010352, LMST03020307, LMST03020308, LMST04030119, LMST04030120	0	0	1									5alpha-cholestanone	ST
C25H42O4	M+H	C25H42O4+H+	407.316	MG(0:0/22:4(7Z,10Z,13Z,16Z)/0:0), MG(22:4(7Z,10Z,13Z,16Z)/0:0/0:0)	HMDB0011554, HMDB0011584	0	0	1									N-propyl N-(2-hydroxy-ethyl) arachidonoyl amine	FA
C23H43NO5	M+H	C23H43NO5+H+	414.321	N-stearoyl glutamic acid, 3-hydroxypalmitoleoylcarnitine	LMFA08020090, LMFA07070044	0	0	1									3-hydroxypalmitoleoylcarnitine	FA
C25H45NO4	M+H	C25H45NO4+H+	424.342	Linoelaidyl carnitine, Linoleyl carnitine	HMDB0006461, HMDB0006469	0	0	1									Linoleyl carnitine	FA
C25H47NO5	M+H	C25H47NO5+H+	442.353	3-Hydroxy-11Z-octadecenoylcarnitine, 3-Hydroxy-9Z-octadecenoylcarnitine	HMDB0013339, HMDB0013340	0	0	1									3-Hydroxy-9Z-octadecenoylcarnitine	FA
C36H69NO3	M+H	C36H69NO3+H+	564.535	Cer(d14:2(4E,6E)/22:0), Cer(d16:2(4E,6E)/20:0), Cer(d18:1/18:1(9Z)), Cer(d14:1/22:1), Cer(d16:1/20:1)	LMSP02010056, LMSP02010063, LMSP02010003, LMSP02010039, LMSP02010048	0	0	1									Cer(d36:2)	SP
C36H71NO3	M+H	C36H71NO3+H+	566.551	N-Stearoylsphingosine, Ceramide (d18:1/18:0), Cer(d18:0/18:1(11Z)), Cer(d18:0/18:1(9Z))	HMDB0000829, HMDB0004950, HMDB0011762, HMDB0011763	0	0	1									Cer(d36:1)	SP
C39H77NO3	M+NH4	C39H77NO3+NH4+	625.624	Cer(d16:1/23:0), Cer(d15:1/24:0)	LMSP02010017, LMSP02010045	0	0	1									Cer(d39:1)	SP
C43H84NO8P	M+H	C43H84NO8P+H+	774.601	PC(15:0/20:1(11Z)), PC(20:1(11Z)/15:0), PE(14:0/24:1(15Z)), PE(14:1(9Z)/24:0), PE(16:0/22:1(13Z)), PE(16:1(9Z)/22:0), PE(18:0/20:1(11Z)), PE(18:1(11Z)/20:0), PE(18:1(9Z)/20:0), PE(20:0/18:1(11Z)), PE(20:0/18:1(9Z)), PE(20:1(11Z)/18:0), PE(22:1(13Z)/16:0), PE(22:0/16:1(9Z)), PE(24:0/14:1(9Z)), PE(24:1(15Z)/14:0), PE-NMe2(18:1(9Z)/18:0)	HMDB0007945, HMDB0008297, HMDB0008849, HMDB0008881, HMDB0008941, HMDB0008973, HMDB0008999, HMDB0009031, HMDB0009064, HMDB0009223, HMDB0009224, HMDB0009255, HMDB0009517, HMDB0009485, HMDB0009713, HMDB0009745, HMDB0114043	1	1	0	0	3.01395e-06	2.0843e-06	5.00092e-06	1.48925e-05	1.83557e-05	-2.90735	0.624732	PE(38:1)	GP
C13H25NO5	M+NH4	C13H25NO5+NH4+	293.207	Hydroxyhexanoycarnitine, Serratamic acid	LMFA07070072, LMFA00000002	1	1	0	0	0.000116232	0.000127053	0	0.000579066	0.000527531	-2.18541	0.423694	Hydroxyhexanoycarnitine	FA
C15H29NO3	M+H	C15H29NO3+H+	272.222	Tridecanoylglycine	HMDB0013317	1	1	0	3.2683e-05	3.24471e-05	3.24311e-05	6.52138e-05	6.01538e-05	5.93473e-05	-0.920923	1.04272	Tridecanoylglycine	PM
C10H13N5O4	M+H	C10H13N5O4+H+	268.104	Adenosine, Deoxyguanosine	HMDB0000050, HMDB0000085	1	1	0	1.6814e-05	0.000146671	0.000140513	1.06781e-05	0.000191204	0.000137802	-0.160129	0.0377264	Adenosine	PM
C9H16O9	M+H	C9H16O9+H+	269.087	3-Deoxy-D-glycero-D-galacto-2-nonulosonic acid	HMDB0000425	1	1	0	3.00727e-06	5.42269e-05	4.03884e-05	4.05287e-06	4.09466e-05	2.34407e-05	0.512371	0.149354	3-Deoxy-D-glycero-D-galacto-2-nonulosonic acid	PM
C10H19NO5	M+H	C10H19NO5+H+	234.134	Hydroxypropionylcarnitine	HMDB0013125	1	1	0	0.000320612	0.00253795	0.00254918	0.000413842	0.00111084	0.00107385	1.05733	0.355043	Hydroxypropionylcarnitine	FA
C12H12O5	M+H	C12H12O5+H+	237.076	Dillapional, Austdiol, 3-(6,7-dimethoxy-2H-1,3-benzodioxol-5-yl)prop-2-enal, 3-(4,7-dimethoxy-2H-1,3-benzodioxol-5-yl)prop-2-enal	HMDB0030582, HMDB0030858, HMDB0128676, HMDB0137293	1	1	0	3.30477e-06	1.90204e-05	3.29736e-05	0	4.39844e-06	3.40589e-06	2.8249	0.460002	Austdiol	PM
C45H78O2	M+NH4	C45H78O2+NH4+	668.634	16:1 Sitosteryl ester, 16:0 Stigmasteryl ester, 18:1 Cholesteryl ester, 18:1 Cholesteryl ester (d5)	LMST01020056, LMST01020054, LMST01020003, LMST01020030	1	1	0	3.26768e-05	2.59537e-05	2.63864e-05	0	1.3257e-06	6.86967e-06	3.37487	1.42919	18:1 Cholesteryl ester	ST
C49H90O5	M+H	C49H90O5+H+	759.686	DG(22:2(13Z,16Z)/24:1(15Z)/0:0), DG(24:1(15Z)/22:2(13Z,16Z)/0:0), DG(24:1n9/0:0/22:2n6)	HMDB0007674, HMDB0007842, HMDB0056273	1	1	0	1.17087e-05	6.57171e-06	8.46464e-06	0	0	0	Only in Lesion	0.736928	DG(46:3)	GL
C21H36O3	M+H	C21H36O3+H+	337.274	Pregnanetriol, 3-Methyl-5-pentyl-2-furanundecanoic acid, 3-â€‹Methyl-â€‹5-â€‹propyl-2-â€‹furantridecanoic acid	HMDB0006070, HMDB0031005, HMDB0112079	0	1	0									Pregnanetriol	ST
C26H50O4	M+H	C26H50O4+H+	427.378	Hexacosanedioic acid	LMFA01170040	0	1	0									Hexacosanedioic acid	FA
C42H81NO2	M+H	C42H81NO2+H+	632.634	Cer(m18:1(4E)/24:1(15Z))	LMSP00000010	0	1	0									Cer(m42:2)	SP
C12H13NO2	M+H	C12H13NO2+H+	204.102	3-Indolebutyric acid, 5-(2-Furanyl)-1,2,3,4,5,6-hexahydro-7H-cyclopenta[b]pyridin-7-one	HMDB0002096, HMDB0039656	0	1	0									3-Indolebutyric acid	PM
C9H14N2O6	M+H	C9H14N2O6+H+	247.092	L-alpha-Aspartyl-L-hydroxyproline, 5,6-Dihydrouridine	HMDB0011160, HMDB0000497	1	0	0									L-alpha-Aspartyl-L-hydroxyproline	PM
C40H80NO12P	M+H	C40H80NO12P+H+	798.549	PI-Cer(d18:0/16:0(2OH)), PI-Cer(t20:0/14:0), PI-Cer(t18:0/16:0)	LMSP03030030, LMSP03030153, LMSP03030012	1	0	0									PI-Cer(d34:0(2OH))	GP/SP

## Sheet: Control Stroke
Neurotransmitter Mass Range
						Replicate Detection								Lesion (TIC-Normalized Average Ion Abundance)						Healthy (TIC-Normalized Average Ion Abundance)
formula	adduct	ion	mz	moleculeNames	moleculeIds	C59M1R1	C59M1R2	C57M3R1	C57M3R2	C57M4R1	C57M4R2	C59M1R3	C59M1R4	C57M3R1	C57M3R2	C57M4R1	C57M4R2	C59M15R1	C59M15R2	C57M3R1	C57M3R2	C57M4R1	C57M4R2	C59M15R1	C59M15R2	log2(Fold Change) (Lesion/Healthy)	"-log10(BH-Adjusted P-Value)"	Selected Annotation	Category
C3H6O2	M+H	C3H6O2+H+	75.0441	Propionic acid	LMFA01010003	1	1	1	1	1	1	1	1	0.000241966	0.000188168	0.000305496	0.000174543	0.000184512	0.000143803	0.00017525	0.000131497	0.000256838	0.000138681	0.000139057	0.000113731	0.37493	0.541651	Propionic acid	FA
C4H4N2	M+H	C4H4N2+H+	81.0447	Pyrimidine	HMDB0003361	1	1	1	1	1	1	1	1	0.000530819	0.000690531	0.000846312	0.000707062	0.000590004	0.000638416	0.000720002	0.000858058	0.00095057	0.000893355	0.000753536	0.000928265	-0.350435	1.29414	Pyrimidine	PM
C5H6O	M+H	C5H6O+H+	83.0491	2-Methylfuran, 2,4-Pentadienal	HMDB0013749, HMDB0031597	1	1	1	1	1	1	1	1	0.0017046	0.00207643	0.00313064	0.00186752	0.00182606	0.00250943	0.00170603	0.00201006	0.00260052	0.00188384	0.00217925	0.00282333	-0.00968491	0.00914928	2-Methylfuran	PM
C4H4O2	M+H	C4H4O2+H+	85.0284	4-Hydroxy-2-butenoic acid gamma-lactone	HMDB0032330	1	1	1	1	1	1	1	1	0.0170731	0.01673	0.0176061	0.0181726	0.0142451	0.0133082	0.0154188	0.0123295	0.0149291	0.0149898	0.0131973	0.0121895	0.225942	0.971507	4-Hydroxy-2-butenoic acid gamma-lactone	PM
C3H4N2O	M+H	C3H4N2O+H+	85.0396	Imidazolone	HMDB0004363	1	1	1	1	1	1	1	1	0.00043683	0.000535468	0.000413777	0.000634807	0.000468157	0.000479091	0.000547332	0.000574777	0.000375308	0.000688101	0.000566135	0.000596328	-0.173737	0.385334	Imidazolone	PM
C4H7NO	M+H	C4H7NO+H+	86.06	2-Pyrrolidinone	HMDB0002039	1	1	1	1	1	1	1	1	0.00602816	0.00779662	0.00841401	0.00815883	0.00802828	0.00995787	0.00854359	0.010422	0.00956938	0.0104282	0.0102262	0.0129893	-0.361896	1.22925	2-Pyrrolidinone	PM
C3H2O2	M+NH4	C3H2O2+NH4+	88.0393	Propynoic acid	HMDB0006804	1	1	1	1	1	1	1	1	0.0010794	0.00108402	0.00104144	0.00125715	0.00111427	0.00107389	0.00138105	0.00118584	0.00124517	0.00142887	0.00128227	0.00127251	-0.229292	1.47181	Propynoic acid	PM
C4H9NO	M+H	C4H9NO+H+	88.0757	Morpholine, 4-Aminobutyraldehyde, N-Ethylacetamide, 2-(dimethylamino)acetaldehyde	HMDB0031581, HMDB0001080, HMDB0031215, HMDB0142479	1	1	1	1	1	1	1	1	0.00568227	0.00617836	0.00767163	0.00699113	0.00615486	0.00679303	0.00822572	0.00889095	0.0105716	0.0089924	0.00735931	0.00855364	-0.414084	1.48899	4-Aminobutyraldehyde	PM
C3H4O3	M+H	C3H4O3+H+	89.0233	Pyruvic acid, Malonic semialdehyde	HMDB0000243, HMDB0011111	1	1	1	1	1	1	1	1	0.000331053	0.000449096	0.000633182	0.000391162	0.000429378	0.000546581	0.000350611	0.000333095	0.000469448	0.000377187	0.000485332	0.000549938	0.116016	0.15895	Pyruvic acid	FA
C4H12N2	M+H	C4H12N2+H+	89.1073	Putrescine	HMDB0001414	1	1	1	1	1	1	1	1	0.000673344	0.000798759	0.00068398	0.00076485	0.000698661	0.000833814	0.00138311	0.00165794	0.00131312	0.00126004	0.000833457	0.00101627	-0.745025	1.38551	Putrescine	PM
C3H7NO2	M+H	C3H7NO2+H+	90.055	beta-Alanine, L-Alanine, Sarcosine, D-Alanine, Ethyl carbamate	HMDB0000056, HMDB0000161, HMDB0000271, HMDB0001310, HMDB0031219	1	1	1	1	1	1	1	1	0.000232955	0.000280118	0.000337235	0.000235531	0.000226645	0.000276646	0.000276451	0.000300839	0.000404621	0.000253669	0.00029026	0.000335538	-0.228133	0.613994	L-Alanine	AA
C4H11NO	M+H	C4H11NO+H+	90.0913	Dimethylethanolamine	HMDB0032231	1	1	1	1	1	1	1	1	0.00248437	0.00363046	0.0034677	0.00414643	0.00327363	0.00447577	0.00513833	0.0080919	0.005378	0.00719545	0.0042757	0.00547775	-0.727255	1.36729	Dimethylethanolamine	PM
C3H6O3	M+H	C3H6O3+H+	91.039	L-Lactic acid, Hydroxypropionic acid, Glyceraldehyde, D-Lactic acid, Dihydroxyacetone, Dimethyl carbonate, Monoethyl carbonate, Methoxyacetic acid, 2-hydroxypropanoic acid	HMDB0000190, HMDB0000700, HMDB0001051, HMDB0001311, HMDB0001882, HMDB0029580, HMDB0031232, HMDB0041929, HMDB0144295	1	1	1	1	1	1	1	1	8.8532e-05	7.67282e-05	6.96371e-05	7.93967e-05	7.58438e-05	7.17928e-05	7.48368e-05	5.08876e-05	5.58055e-05	6.2184e-05	6.72587e-05	5.57305e-05	0.333064	1.38878	L-Lactic acid	PM
C4H10O2	M+H	C4H10O2+H+	91.0754	2,3-Butanediol, 1,1-Dimethoxyethane, 2-Ethoxyethanol, 1,3-Butanediol	HMDB0003156, HMDB0030061, HMDB0031213, HMDB0031320	1	1	1	1	1	1	1	1	3.05746e-05	1.73113e-05	1.97625e-05	1.82791e-05	1.10282e-05	8.45251e-06	2.86716e-05	6.24987e-06	7.18899e-06	5.63147e-06	6.02586e-06	3.13211e-06	0.889488	0.609382	2,3-Butanediol	PM
C3H6O2	M+NH4	C3H6O2+NH4+	92.0706	Methyl acetate, Lactaldehyde, 3-Hydroxypropanal, D-Lactaldehyde, Hydroxyacetone, Ethyl formate	HMDB0031523, HMDB0003052, HMDB0003453, HMDB0006458, HMDB0006961, HMDB0031229	1	1	1	1	1	1	1	1	6.77781e-06	6.82491e-06	0.000194623	1.53577e-05	7.06315e-06	8.15081e-06	1.40371e-05	1.39904e-05	0.000323556	1.66138e-05	5.48625e-06	1.23502e-05	-0.692938	0.0772656	Lactaldehyde	PM
C4H6O3	M+H	C4H6O3+H+	103.039	3-methyl pyruvic acid, 4-hydroxy-crotonic acid, 2-methyl-3-oxo-propanoic acid, 3-hydroxybut-2-enoic acid, (S)-Methylmalonic acid semialdehyde, Acetoacetic acid, Succinic acid semialdehyde	LMFA01060002, LMFA01050398, LMFA01060193, LMFA01030978, LMFA01060190, LMFA01060003, LMFA06000118	1	1	1	1	1	1	1	1	0.000544338	0.000593379	0.000680453	0.000576033	0.000555791	0.000671464	0.000492264	0.000447859	0.000466808	0.000484147	0.00054937	0.000616837	0.244319	1.12375	Succinic acid semialdehyde	FA
C4H9NO2	M+H	C4H9NO2+H+	104.071	2-amino-isobutyric acid, 2S-amino-butanoic acid, (S)-b-amino-isobutyric acid, 4-amino-butanoic acid, 2R-amino-butanoic acid, (R)-b-amino-isobutyric acid, 3-amino-isobutanoic acid	LMFA01100053, LMFA01100034, LMFA01100050, LMFA01100039, LMFA01100043, LMFA01100049, LMFA01100054	1	1	1	1	1	1	1	1	0.000403735	0.000475809	0.000642025	0.000396411	0.000398201	0.000534365	0.000482717	0.000574121	0.000712756	0.000451375	0.000469035	0.0005753	-0.19598	0.400095	GABA	FA
C5H6N2O	M+H	C5H6N2O+H+	111.055	Imidazole-4-acetaldehyde, 3-Hydroxy-4-aminopyridine	HMDB0003905, HMDB0060741	1	1	1	1	1	1	1	1	0.000402611	0.0006105	0.000605526	0.000532275	0.000563597	0.000834464	0.00067676	0.000925608	0.000700524	0.000785508	0.000789394	0.00108981	-0.485149	1.15987	Imidazole-4-acetaldehyde	PM
C6H7N	M+NH4	C6H7N+NH4+	111.092	Aniline	HMDB0003012	1	1	1	1	1	1	1	1	0.00243574	0.00263108	0.00239361	0.00282899	0.00330885	0.00317217	0.0053463	0.00547656	0.004179	0.00459236	0.00365951	0.00376159	-0.687858	1.50811	Aniline	PM
C5H5NO2	M+H	C5H5NO2+H+	112.039	Pyrrole-2-carboxylic acid	HMDB0004230	1	1	1	1	1	1	1	1	0.000357232	0.000506471	0.000494252	0.000495654	0.000479667	0.000611232	0.000574638	0.000664242	0.000554658	0.000671166	0.000673515	0.00081941	-0.42661	1.36729	Pyrrole-2-carboxylic acid	PM
C4H5N3O	M+H	C4H5N3O+H+	112.051	Cytosine	HMDB0000630	1	1	1	1	1	1	1	1	0.000313519	0.00029088	0.000133101	0.000242765	0.000203309	9.08447e-05	0.000118892	0.000107043	8.68122e-05	0.000108074	0.000132083	6.37114e-05	1.0474	1.09412	Cytosine	PM
C5H9N3	M+H	C5H9N3+H+	112.087	Histamine	HMDB0000870	1	1	1	1	1	1	1	1	0.000210579	0.00035744	0.00027727	0.000284504	0.000347145	0.000536762	0.000382966	0.000578498	0.00035698	0.00047363	0.000469867	0.000675649	-0.544784	0.953159	Histamine	PM
C5H4O3	M+H	C5H4O3+H+	113.023	3-Furoic acid, 2-Furoic acid	HMDB0000444, HMDB0000617	1	1	1	1	1	1	1	1	0.000368961	0.000447649	0.00114179	0.000364352	0.000431997	0.000571311	0.000321354	0.000332193	0.00054861	0.000318093	0.000443284	0.000527014	0.41735	0.316072	3-Furoic acid	PM
C4H4N2O2	M+H	C4H4N2O2+H+	113.035	Uracil, 4-Carboxypyrazole	HMDB0000300, HMDB0060760	1	1	1	1	1	1	1	1	0.000366719	0.000439686	0.000308186	0.000438035	0.000277808	0.000303083	0.000344499	0.000324214	0.000253976	0.000389526	0.000329774	0.000355888	0.0947654	0.16823	Uracil	PM
C5H7NO2	M+H	C5H7NO2+H+	114.055	1-Pyrroline-5-carboxylic acid, 1-Pyrroline-2-carboxylic acid	HMDB0001301, HMDB0006875	1	1	1	1	1	1	1	1	0.00150925	0.00172754	0.00162216	0.00177715	0.00157288	0.00167219	0.00212067	0.00222597	0.00191416	0.00213703	0.00185266	0.00201748	-0.312143	1.60372	1-Pyrroline-5-carboxylic acid	PM
C4H7N3O	M+H	C4H7N3O+H+	114.066	Creatinine	HMDB0000562	1	1	1	1	1	1	1	1	5.81623e-05	4.37299e-05	7.76068e-05	3.49703e-05	6.39185e-05	2.09569e-05	3.9615e-05	3.18103e-05	0.00011007	2.1408e-05	6.41701e-05	2.06839e-05	0.0569575	0.0188123	Creatinine	PM
C4H6N2O2	M+H	C4H6N2O2+H+	115.05	Dihydrouracil, N-Methylhydantoin	HMDB0000076, HMDB0003646	1	1	1	1	1	1	1	1	0.00015155	0.000213272	0.000515035	0.000211524	0.000213097	0.000273079	0.0002311	0.000273183	0.000638805	0.000268719	0.000297832	0.000393299	-0.414714	0.32978	Dihydrouracil	PM
C5H10N2O	M+H	C5H10N2O+H+	115.087	3-Amino-2-piperidone, N-Mononitrosopiperazine	HMDB0000323, HMDB0061162	1	1	1	1	1	1	1	1	0.00131143	0.00175003	0.00104387	0.00112529	0.00119402	0.0014725	0.00230239	0.00278639	0.00139492	0.00173495	0.0016321	0.00189385	-0.572596	1.09412	3-Amino-2-piperidone	PM
C5H9NO2	M+H	C5H9NO2+H+	116.071	L-Proline, D-Proline, Acetamidopropanal, 4-Amino-2-methylenebutanoic acid	HMDB0000162, HMDB0003411, HMDB0012880, HMDB0030409	1	1	1	1	1	1	1	1	0.00686225	0.00735653	0.00546619	0.00724083	0.00515258	0.00542533	0.00978471	0.00959681	0.00721801	0.00859992	0.00600036	0.0061208	-0.335436	0.804415	L-Proline	AA
C5H8O3	M+H	C5H8O3+H+	117.055	3-methyl-2-oxo-butanoic acid, 5-oxo-pentanoic acid, 2methyl-3-ketovaleric acid, 2-keto valeric acid, 3-keto valeric acid, Levulinic acid, methyl 3-hydroxybut-2-enoate	LMFA01020274, LMFA01060161, LMFA01060192, LMFA01060004, LMFA01060005, LMFA01060006, LMFA07010948	1	1	1	1	1	1	1	1	0.000897844	0.00180292	0.00175466	0.00144619	0.00417019	0.00221449	0.00105369	0.00162579	0.0016569	0.00128246	0.00301455	0.00160524	0.263027	0.15895	3-methyl-2-oxo-butanoic acid	FA
C6H12O2	M+H	C6H12O2+H+	117.091	(±)-2-Methylpentanoic acid, Caproic acid, Isocaproic acid, Methyl (S)-2-Methylbutanoate, Methyl 3-methylbutanoate, Isopropyl propionate, Propyl propionate, Methyl pentanoate, 2-Ethylbutanoic acid, 2-Methylpropyl acetate, Ethyl 2-methylpropanoate, n-Butyl acetate, Diacetone alcohol, 3-Methylpentanoic acid, Ethyl butyrate	HMDB0031580, HMDB0000535, HMDB0000689, HMDB0029762, HMDB0030027, HMDB0030056, HMDB0030059, HMDB0031207, HMDB0031221, HMDB0031246, HMDB0031248, HMDB0031325, HMDB0031511, HMDB0033774, HMDB0033889	1	1	1	1	1	1	1	1	0.0610922	0.0468884	0.0411248	0.0407036	0.044534	0.0327367	0.0503799	0.0376862	0.0393412	0.0368498	0.0354198	0.0257042	0.244904	0.487337	Caproic acid	FA
C4H7NOS	M+H	C4H7NOS+H+	118.032	Homocysteine thiolactone	HMDB0002287	1	1	1	1	1	1	1	1	0.00179494	0.00113409	0.000945818	0.00184789	0.00118761	0.000593458	0.00158072	0.000959589	0.00130092	0.00155569	0.000969033	0.000629092	0.101291	0.0658958	Homocysteine thiolactone	PM
C4H7NO3	M+H	C4H7NO3+H+	118.05	L-2-Amino-3-oxobutanoic acid, Acetylglycine, L-Aspartate-semialdehyde	HMDB0006454, HMDB0000532, HMDB0012249	1	1	1	1	1	1	1	1	0.000116396	0.000132131	0.000123187	0.00013087	0.000109132	0.000119596	0.000132517	0.000126338	0.000128263	0.000134188	0.000127706	0.00013449	-0.099452	0.856898	L-2-Amino-3-oxobutanoic acid	FA
C8H7N	M+H	C8H7N+H+	118.065	Indole	HMDB0000738	1	1	1	1	1	1	1	1	9.44339e-05	0.000148282	0.000336831	0.000126609	0.000153976	0.000218373	0.000159848	0.000219091	0.000419265	0.000186966	0.000211846	0.000299951	-0.47301	0.45837	Indole	PM
C4H9NO3	M+H	C4H9NO3+H+	120.066	L-Homoserine, L-Allothreonine, Hydroxyethyl glycine	HMDB0000719, HMDB0004041, HMDB0061148	1	1	1	1	1	1	1	1	0.000138652	0.000165919	0.000208092	0.000142967	0.000143146	0.000188007	0.000210676	0.000241678	0.000253423	0.000204451	0.000175217	0.000202796	-0.384597	1.27903	L-Threonine	AA
C8H8O	M+H	C8H8O+H+	121.065	4-Hydroxystyrene, Phenylacetaldehyde, 2,3-Dihydrobenzofuran, 2-Methylbenzaldehyde, 3-Methylbenzaldehyde, 4-Methylbenzaldehyde, Lentialexin, 3-ethenylphenol	HMDB0004072, HMDB0006236, HMDB0013815, HMDB0029636, HMDB0029637, HMDB0029638, HMDB0038997, HMDB0124943	1	1	1	1	1	1	1	1	0.000853406	0.000944101	0.00135705	0.000954567	0.000744668	0.000848964	0.000961155	0.000964026	0.00128467	0.000964432	0.000896013	0.00102046	-0.094962	0.158057	Phenylacetaldehyde	PM
C8H11N	M+H	C8H11N+H+	122.096	N,N-Dimethylaniline, 1-Phenylethylamine, Phenylethylamine, 5-Ethyl-2-methylpyridine, 2-Propylpyridine, 2,6-Dimethylaniline	HMDB0001020, HMDB0002017, HMDB0012275, HMDB0029729, HMDB0032497, HMDB0060677	1	1	1	1	1	1	1	1	0.000324291	0.000401161	0.000550466	0.00037256	0.000363589	0.000490563	0.000491301	0.000668237	0.000745867	0.000522927	0.000496443	0.000672306	-0.523381	1.31515	1-Phenylethylamine	PM
C6H6N2O	M+H	C6H6N2O+H+	123.055	Niacinamide, 2-Acetylpyrazine	HMDB0001406, HMDB0031861	1	1	1	1	1	1	1	1	0.00122064	0.00155744	0.00102643	0.00116922	0.00122465	0.00158561	0.00157164	0.00198569	0.00116439	0.00156962	0.00151668	0.00188536	-0.31649	0.856898	Niacinamide	PM
C6H5NO2	M+H	C6H5NO2+H+	124.039	Nicotinic acid, Picolinic acid, 2-Hydroxy-4-imino-2,5-cyclohexadienone, Isonicotinic acid	HMDB0001488, HMDB0002243, HMDB0031713, HMDB0060665	1	1	1	1	1	1	1	1	0.000172024	0.000214008	0.000186361	0.000196256	0.000180008	0.000220838	0.000232646	0.000255355	0.00019578	0.000246405	0.000241861	0.000274473	-0.306701	1.38878	Picolinic acid	PM
C6H8N2O	M+H	C6H8N2O+H+	125.071	Methylimidazole acetaldehyde, 2-Methoxy-3-methylpyrazine	HMDB0004181, HMDB0031852	1	1	1	1	1	1	1	1	0.000346081	0.000546545	0.000557918	0.000473083	0.000514877	0.000773085	0.000638898	0.000950157	0.000697116	0.0007596	0.00074253	0.00104404	-0.589436	1.31163	Methylimidazole acetaldehyde	PM
C6H4O2	M+NH4	C6H4O2+NH4+	126.055	Quinone, 1,2-Benzoquinone	HMDB0003364, HMDB0012133	1	1	1	1	1	1	1	1	0.000855369	0.00111286	0.0010589	0.00114584	0.000978694	0.00115993	0.00135701	0.00149759	0.00118473	0.00147628	0.00127825	0.00145789	-0.386696	1.60372	Quinone	PM
C5H7N3O	M+H	C5H7N3O+H+	126.066	5-Methylcytosine, 2-O-Methylcytosine, 3-Methylcytosine	HMDB0002894, HMDB0004339, HMDB0011601	1	1	1	1	1	1	1	1	5.13518e-05	5.61167e-05	4.98766e-05	5.55218e-05	4.25659e-05	4.03114e-05	5.96846e-05	6.31459e-05	6.13221e-05	5.84131e-05	4.50491e-05	4.41202e-05	-0.165681	0.481318	5-Methylcytosine	PM
C7H8O	M+NH4	C7H8O+NH4+	126.091	p-Cresol, m-Cresol	HMDB0001858, HMDB0002048	1	1	1	1	1	1	1	1	0.00155111	0.00255633	0.00276458	0.00217215	0.00265439	0.00386984	0.0030999	0.00457758	0.00355586	0.00368081	0.00392529	0.00529154	-0.632265	1.31515	p-Cresol	PM
C6H11N3	M+H	C6H11N3+H+	126.103	1-Methylhistamine, 3-Methylhistamine	HMDB0000898, HMDB0001861	1	1	1	1	1	1	1	1	9.03676e-05	8.92426e-05	7.30816e-05	6.70407e-05	8.10113e-05	7.73897e-05	0.000157664	0.000167311	0.000125829	0.00010052	8.2259e-05	8.17431e-05	-0.581185	0.929793	1-Methylhistamine	PM
C5H6N2O2	M+H	C5H6N2O2+H+	127.05	Thymine, Imidazoleacetic acid, 1H-Imidazole-1-acetic acid	HMDB0000262, HMDB0002024, HMDB0029736	1	1	1	1	1	1	1	1	0.00277104	0.00300758	0.00194913	0.00285335	0.00124229	0.00121438	0.00139751	0.0012749	0.00102885	0.00152956	0.00119358	0.00120308	0.773417	0.969998	Imidazoleacetic acid	PM
C6H9NO2	M+H	C6H9NO2+H+	128.071	(±)-4-Methylene-2-pyrrolidinecarboxylic acid, D-1-Piperideine-2-carboxylic acid, (S)-2,3,4,5-Tetrahydropiperidine-2-carboxylate	HMDB0029434, HMDB0001084, HMDB0012130	1	1	1	1	1	1	1	1	0.000920883	0.00115114	0.00102484	0.00104258	0.00094319	0.00121189	0.0014429	0.00165179	0.00122586	0.00140378	0.0012815	0.00156091	-0.444647	1.58536	D-1-Piperideine-2-carboxylic acid	PM
C7H10O	M+NH4	C7H10O+NH4+	128.107	2,3,5-Trimethylfuran, 2-Ethyl-5-methylfuran, 3-Methyl-2-cyclohexen-1-one	HMDB0029721, HMDB0029728, HMDB0031541	1	1	1	1	1	1	1	1	0.00335304	0.00423446	0.00389137	0.00392787	0.00376092	0.00469671	0.00430669	0.00525965	0.00434615	0.00483801	0.00475688	0.00572389	-0.292654	1.27926	2-Ethyl-5-methylfuran	PM
C5H8N2O2	M+H	C5H8N2O2+H+	129.066	Dihydrothymine, Squamolone, L-Cyclo(alanylglycyl)	HMDB0000079, HMDB0029874, HMDB0031547	1	1	1	1	1	1	1	1	0.000138392	0.000215573	0.000217247	0.000196149	0.000199436	0.000269238	0.000221708	0.000276284	0.000232986	0.000256511	0.000280247	0.000362861	-0.399682	1.01769	Dihydrothymine	PM
C5H7NO3	M+H	C5H7NO3+H+	130.05	Pyroglutamic acid, Pyrrolidonecarboxylic acid, Pyrroline hydroxycarboxylic acid, N-Acryloylglycine, 1-Pyrroline-4-hydroxy-2-carboxylate, dimethadione	HMDB0000267, HMDB0000805, HMDB0001369, HMDB0001843, HMDB0002234, HMDB0061093	1	1	1	1	1	1	1	1	0.000269981	0.000269486	0.000249349	0.000282577	0.000196419	0.000199466	0.000310082	0.000269655	0.000270091	0.000295178	0.00022623	0.000221945	-0.118768	0.291092	Pyroglutamic acid	PM
C6H11NO2	M+H	C6H11NO2+H+	130.086	L-trans-4-Methyl-2-pyrrolidinecarboxylic acid, L-Pipecolic acid, D-Pipecolic acid, Pipecolic acid, N4-Acetylaminobutanal, 2-Pyrrolidineacetic acid	HMDB0029435, HMDB0000716, HMDB0005960, HMDB0000070, HMDB0004226, HMDB0029444	1	1	1	1	1	1	1	1	0.00141249	0.00164239	0.00173033	0.00157587	0.00147132	0.00176891	0.00205807	0.00228852	0.00227015	0.00197432	0.00167585	0.00194454	-0.34693	1.42892	Pipecolic acid	PM
C5H6O4	M+H	C5H6O4+H+	131.034	Itaconic acid, Methyl hydrogen fumarate, Citraconic acid, Glutaconic acid, Mesaconic acid, cis-Glutaconic acid	LMFA01170063, LMFA07010962, LMFA01170099, LMFA01170109, LMFA01170116, LMFA01170134	1	1	1	1	1	1	1	1	0.000111372	0.000114676	0.000181142	0.000111544	0.000111245	0.000100967	9.51242e-05	7.27731e-05	0.000133175	8.9499e-05	0.000104429	9.52379e-05	0.308468	0.603708	Itaconic acid	FA
C6H14N2O	M+H	C6H14N2O+H+	131.118	N-Acetylputrescine	HMDB0002064	1	1	1	1	1	1	1	1	3.71199e-05	6.51125e-05	5.88262e-05	5.19408e-05	6.18354e-05	9.37859e-05	8.39384e-05	0.000122223	7.79223e-05	8.78762e-05	8.68107e-05	0.000114336	-0.636666	1.31792	N-Acetylputrescine	PM
C5H9NO3	M+H	C5H9NO3+H+	132.066	4-Hydroxyproline, N-Acetyl-L-alanine, Propionylglycine, 5-Aminolevulinic acid, L-Glutamic gamma-semialdehyde, 3-Hydroxy-L-proline, 5-Amino-2-oxopentanoic acid	HMDB0000725, HMDB0000766, HMDB0000783, HMDB0001149, HMDB0002104, HMDB0002113, HMDB0006272	1	1	1	1	1	1	1	1	0.000547224	0.000670619	0.000610894	0.000678799	0.000657671	0.000649736	0.000786751	0.000933697	0.000755812	0.000903566	0.00067763	0.00063593	-0.298968	1.08741	L-Glutamic gamma-semialdehyde	PM
C9H9N	M+H	C9H9N+H+	132.081	3-Methylindole	HMDB0000466	1	1	1	1	1	1	1	1	0.000571629	0.000936974	0.000985011	0.000785723	0.00106244	0.00146758	0.00120816	0.00178589	0.00142542	0.00142204	0.00158749	0.00215783	-0.722676	1.38878	3-Methylindole	PM
C5H8O4	M+H	C5H8O4+H+	133.05	Monoethyl malonic acid, Ethylmalonic acid, Glutaric acid, Methylsuccinic acid, Dimethylmalonic acid, 2-Acetolactate, (S)-2-Acetolactate, (S)-Methylbutanethioic acid	HMDB0000576, HMDB0000622, HMDB0000661, HMDB0001844, HMDB0002001, HMDB0006833, HMDB0006855, HMDB0061879	1	1	1	1	1	1	1	1	9.81566e-05	9.6409e-05	0.000109754	9.65736e-05	8.19518e-05	8.61303e-05	8.48384e-05	6.89563e-05	9.23087e-05	8.04147e-05	7.88734e-05	7.83053e-05	0.234263	1.15987	Glutaric acid	AA
C8H7NO	M+H	C8H7NO+H+	134.06	Indoxyl, 4-Hydroxybenzeneacetonitrile, 2-Methyl-4,5-benzoxazole	HMDB0004094, HMDB0029757, HMDB0032390	1	1	1	1	1	1	1	1	9.76884e-05	0.000117947	0.000131398	9.64528e-05	6.97251e-05	8.11521e-05	0.000107575	0.000109272	0.000138476	0.000105308	8.73963e-05	0.000102318	-0.129858	0.219011	5-Hydroxyindole	PM
C5H11NO3	M+H	C5H11NO3+H+	134.081	L-2-Amino-5-hydroxypentanoic acid, N-Lactoyl ethanolamine	HMDB0031658, HMDB0032356	1	1	1	1	1	1	1	1	0.000101582	0.000133356	0.00014	0.00011316	0.000132089	0.00018607	0.0001596	0.000207737	0.000163203	0.000162508	0.00016699	0.000207065	-0.404389	1.21049	N-Lactoyl ethanolamine	PM
C9H11N	M+H	C9H11N+H+	134.096	1,2,3,4-Tetrahydroisoquinoline	HMDB0012489	1	1	1	1	1	1	1	1	0.00126462	0.00140083	0.000778019	0.000826868	0.000836828	0.00106854	0.0018045	0.00209214	0.000983281	0.0010783	0.00078582	0.00104255	-0.334387	0.344779	1,2,3,4-Tetrahydroisoquinoline	PM
C5H5N5	M+H	C5H5N5+H+	136.062	Adenine	HMDB0000034	1	1	1	1	1	1	1	1	0.00148516	0.00148359	0.000888075	0.00125284	0.000844406	0.000580908	0.000701568	0.00067067	0.000492866	0.000655202	0.000643935	0.00045078	0.854179	1.12375	Adenine	PM
C8H9NO	M+H	C8H9NO+H+	136.076	N-Acetylarylamine, 2-Phenylacetamide, 2-Aminoacetophenone, 2'-Aminoacetophenone	HMDB0001250, HMDB0010715, HMDB0032628, HMDB0032630	1	1	1	1	1	1	1	1	0.000647212	0.000863389	0.000774682	0.000750844	0.000686904	0.000874374	0.000864075	0.00106254	0.00082701	0.000942527	0.000865975	0.00106287	-0.29103	1.2685	2-Phenylacetamide	PM
C7H8N2O	M+H	C7H8N2O+H+	137.071	N-Methylnicotinamide, 2-Acetyl-3-methylpyrazine	HMDB0003152, HMDB0030001	1	1	1	1	1	1	1	1	0.000152015	0.000235408	0.000238009	0.000207507	0.0002154	0.000310984	0.000262522	0.000376754	0.000297656	0.000315713	0.000306379	0.000412649	-0.53653	1.36729	2-Methylnicotinamide	PM
C7H7NO2	M+H	C7H7NO2+H+	138.055	Trigonelline, p-Aminobenzoic acid, 3-Pyridylacetic acid, Methyl nicotinate, 2-Pyridylacetic acid	HMDB0000875, HMDB0001392, HMDB0001538, HMDB0029806, HMDB0060722	1	1	1	1	1	1	1	1	0.000449455	0.00055042	0.000607532	0.000614677	0.000472525	0.000541218	0.000685996	0.000718904	0.00064849	0.000715262	0.000601076	0.000662767	-0.317538	1.44905	2-Aminobenzoic acid	PM
C8H11NO	M+H	C8H11NO+H+	138.091	2-Hydroxyphenethylamine, Tyramine, Dimethylaniline-N-oxide, m-Tyramine, 2-Acetyl-1-ethylpyrrole, 4-Hydroxy-2,6-dimethylaniline	HMDB0001065, HMDB0000306, HMDB0001466, HMDB0004989, HMDB0029759, HMDB0060681	1	1	1	1	1	1	1	1	0.000334484	0.000500081	0.000640846	0.000413696	0.000447242	0.000703108	0.000554881	0.000868057	0.000816994	0.000644815	0.000675032	0.000990105	-0.582016	1.22639	Tyramine	AA
C6H6N2O2	M+H	C6H6N2O2+H+	139.05	Urocanic acid, Nicotinamide N-oxide, 5-Oxo-2(5H)-isoxazolepropanenitrile	HMDB0000301, HMDB0002730, HMDB0031338	1	1	1	1	1	1	1	1	8.27709e-05	0.000107244	0.000101836	0.000104457	9.87222e-05	0.000127161	0.000104604	0.000123871	0.000108391	0.000125352	0.000134189	0.000161934	-0.285493	0.888611	Urocanic acid	PM
C7H7NO	M+NH4	C7H7NO+NH4+	139.087	Benzamide	HMDB0004461	1	1	1	1	1	1	1	1	0.000321184	0.000520946	0.000475937	0.00042906	0.000497072	0.000734755	0.000671021	0.00100743	0.000633663	0.000732848	0.000726366	0.00099839	-0.679097	1.38878	Benzamide	PM
C6H5NO3	M+H	C6H5NO3+H+	140.034	4-Nitrophenol, 6-Hydroxynicotinic acid, 3-Hydroxypicolinic acid	HMDB0001232, HMDB0002658, HMDB0013188	1	1	1	1	1	1	1	1	4.57399e-06	7.01872e-06	7.3823e-06	6.41548e-06	6.33901e-06	9.4876e-06	7.19976e-06	1.05543e-05	6.46995e-06	9.90932e-06	9.41117e-06	1.22168e-05	-0.436022	0.898128	6-Hydroxynicotinic acid	PM
C3H6O3S	M+NH4	C3H6O3S+NH4+	140.038	3-Mercaptolactic acid	HMDB0002127	1	1	1	1	1	1	1	1	2.32004e-05	2.46655e-05	2.59739e-05	4.89715e-05	2.91049e-05	2.38411e-05	4.45382e-05	4.55434e-05	4.56647e-05	6.84879e-05	3.64413e-05	3.67791e-05	-0.658668	1.12573	3-Mercaptolactic acid	PM
C7H6O2	M+NH4	C7H6O2+NH4+	140.071	4-Hydroxybenzaldehyde	HMDB0011718	1	1	1	1	1	1	1	1	0.000889792	0.0011002	0.00113706	0.00109102	0.000947148	0.00112888	0.00146162	0.00161412	0.00151673	0.0015339	0.00123332	0.00140009	-0.476892	1.60372	4-Hydroxybenzaldehyde	PM
C6H9N3O	M+H	C6H9N3O+H+	140.082	Histidinal	HMDB0012234	1	1	1	1	1	1	1	1	2.15721e-05	3.03431e-05	0.000106743	3.10899e-05	2.7399e-05	3.30772e-05	4.01508e-05	5.17793e-05	0.000159289	4.11193e-05	3.50008e-05	4.55783e-05	-0.575633	0.24179	Histidinal	PM
C6H8N2O2	M+H	C6H8N2O2+H+	141.066	1,3-Dimethyluracil, Imidazolepropionic acid, Methylimidazoleacetic acid, Pi-Methylimidazoleacetic acid	HMDB0002144, HMDB0002271, HMDB0002820, HMDB0004988	1	1	1	1	1	1	1	1	0.000238565	0.000399782	0.000366331	0.000333448	0.000411058	0.00057388	0.000435456	0.000609759	0.000408043	0.000533205	0.000606887	0.000786234	-0.540816	1.01376	Methylimidazoleacetic acid	PM
C6H7NO3	M+H	C6H7NO3+H+	142.05	2-aminomuconic acid semialdehyde	LMFA01060191	1	1	1	1	1	1	1	1	0.000121448	0.0001261	9.75025e-05	0.000112805	9.03377e-05	9.27223e-05	0.000147203	0.000135904	0.000108119	0.000132401	0.000108125	0.000111049	-0.212842	0.713687	2-Aminomuconic acid semialdehyde	FA
C6H11N3O	M+H	C6H11N3O+H+	142.097	L-Histidinol	HMDB0003431	1	1	1	1	1	1	1	1	6.77048e-06	1.10141e-05	5.45831e-05	8.26888e-06	1.2284e-05	2.08365e-05	1.52698e-05	2.88138e-05	7.80647e-05	1.41786e-05	2.10168e-05	3.12668e-05	-0.729455	0.3018	L-Histidinol	PM
C8H12O	M+NH4	C8H12O+NH4+	142.123	2,4-octadienal, 5,7-octadienal, 2E,6E-Octadienal, 2E,6Z-Octadienal, 3E,5E-Octadien-2-one, 2,4-Dimethyl-2E,4E-hexadienal, 2E,7-Octadienal, 2E,4Z-Octadienal, 6-Methyl-3E,5-heptadien-2-one	LMFA06000034, LMFA06000035, LMFA06000131, LMFA06000133, LMFA12000017, LMFA06000121, LMFA06000128, LMFA06000132, LMFA12000038	1	1	1	1	1	1	1	1	0.00101675	0.00143574	0.00139642	0.00129075	0.0014193	0.00190194	0.00164262	0.00224238	0.00176042	0.00193643	0.00194842	0.00248107	-0.505512	1.38878	2,4-octadienal	FA
C6H6O4	M+H	C6H6O4+H+	143.034	trans-trans-Muconic acid, Sumiki's acid, cis,cis-Muconic acid, 2,3-Methylenesuccinic acid, benzene-1,2,3,5-tetrol, benzene-1,2,3,4-tetrol	HMDB0002349, HMDB0002432, HMDB0006331, HMDB0059762, HMDB0125218, HMDB0134002	1	1	1	1	1	1	1	1	0.000150807	0.000135839	0.000208498	0.000142059	0.000157001	0.000117205	0.000109965	8.3078e-05	0.000121496	9.51285e-05	0.000136712	9.56673e-05	0.505423	1.22925	2,3-Methylenesuccinic acid	PM
C6H8O4	M+H	C6H8O4+H+	145.05	3-hexenedioic acid, Ethyl hydrogen fumarate, 3E-methylglutaconic acid, (E)-hex-2-enedioic acid, 2E-methyl-glutaconic acid, 2-methylideneglutaric acid	LMFA01170087, LMFA07010876, LMFA01170068, LMFA01170070, LMFA01170079, LMFA01020394	1	1	1	1	1	1	1	1	0.00811392	0.00750695	0.0072584	0.00881343	0.00613646	0.00520315	0.00722421	0.0054441	0.00599909	0.00676562	0.00567939	0.00445598	0.274825	0.720378	3-Hexenedioic acid	FA
C6H11NO3	M+H	C6H11NO3+H+	146.081	Isobutyrylglycine, N-Butyrylglycine, Allysine, 4-Acetamidobutanoic acid, (S)-5-Amino-3-oxohexanoate, 2-Keto-6-aminocaproate, L-trans-5-Hydroxy-2-piperidinecarboxylic acid, N-(2-Carboxymethyl)-morpholine	HMDB0000730, HMDB0000808, HMDB0001263, HMDB0003681, HMDB0012131, HMDB0012151, HMDB0029426, HMDB0061156	1	1	1	1	1	1	1	1	0.000376907	0.000331101	0.00114016	0.000369302	0.000263003	0.000330058	0.000436954	0.000444539	0.000859285	0.000502676	0.000322509	0.000360973	-0.0585463	0.0189326	4-Acetamidobutanoic acid	PM
C9H10N2	M+H	C9H10N2+H+	147.092	Dimethylbenzimidazole, 1H-Indole-3-methanamine, Myosmine, 1,4-Dimethylpyrrolo[1,2-a]pyrazine, 3,4-Dimethylpyrrolo[1,2-a]pyrazine, 1,3-Dimethylpyrrolo[1,2-a]pyrazine	HMDB0003701, HMDB0029740, HMDB0030386, HMDB0030906, HMDB0030907, HMDB0030908	1	1	1	1	1	1	1	1	9.57933e-06	1.80572e-05	3.10391e-05	1.60359e-05	1.57488e-05	2.70024e-05	2.38851e-05	4.01817e-05	4.04814e-05	2.90247e-05	2.50301e-05	3.95837e-05	-0.754656	1.2428	1H-Indole-3-methanamine	PM
C7H14O3	M+H	C7H14O3+H+	147.102	3-Hydroxyisoheptanoic acid, (+/-)-Ethyl 2-hydroxy-2-methylbutyrate, Methyl DL-Leucate, Ethyl 2-hydroxyisovalerate	HMDB0002207, HMDB0032269, HMDB0036231, HMDB0059842	1	1	1	1	1	1	1	1	0.00175795	0.00148892	0.000994127	0.000993695	0.00111021	0.000928449	0.00166986	0.00140067	0.0011812	0.000945897	0.000936906	0.000744522	0.0804102	0.0658958	3-Hydroxyisoheptanoic acid	PM
C5H9NO4	M+H	C5H9NO4+H+	148.06	N-Acetylserine, L-Glutamic acid, O-Acetylserine, L-4-Hydroxyglutamate semialdehyde	HMDB0002931, HMDB0000148, HMDB0003011, HMDB0006556	1	1	1	1	1	1	1	1	2.93679e-05	3.42182e-05	3.28146e-05	2.60902e-05	2.54299e-05	2.87519e-05	3.44163e-05	3.46078e-05	3.53474e-05	3.19908e-05	3.10609e-05	3.31592e-05	-0.183115	0.984338	L-Glutamic acid	AA
C6H13NO3	M+H	C6H13NO3+H+	148.097	(2R,3R,4R)-2-Amino-4-hydroxy-3-methylpentanoic acid, N-(2-Hydroxyethyl)-morpholine N-oxide, 2-amino-6-hydroxyhexanoic acid	HMDB0029449, HMDB0061157, HMDB0142963	1	1	1	1	1	1	1	1	6.41022e-05	8.23728e-05	9.52193e-05	7.41284e-05	8.16058e-05	9.56118e-05	0.000102521	0.000130055	0.000126576	0.000105801	9.87352e-05	0.000116578	-0.464393	1.50811	N-(2-Hydroxyethyl)-morpholine N-oxide	PM
C8H7NO2	M+H	C8H7NO2+H+	150.055	5,6-Dihydroxyindole, NAPQI	HMDB0004058, HMDB0060946	1	1	1	1	1	1	1	1	7.49567e-05	8.91438e-05	7.86164e-05	8.83843e-05	5.18044e-05	5.99062e-05	8.69757e-05	8.61156e-05	7.64362e-05	8.28058e-05	6.08778e-05	6.57944e-05	-0.0518183	0.0658958	5,6-Dihydroxyindole	PM
C5H8O4	M+NH4	C5H8O4+NH4+	150.076	(S)-2-Acetolactate, 2-Acetolactate, (S)-4-hydroxy-2-oxopentanoic acid, Methylsuccinic acid, 2-Hydroxy-4-oxopentanoic acid, dimethyl-malonic acid, Ethylmalonic acid, 3-hydroxy-3-methyl-2-oxo-butanoic acid	LMFA01050460, LMFA01050472, LMFA01050466, LMFA01170119, LMFA01050482, LMFA01170103, LMFA01170105, LMFA01020277	1	1	1	1	1	1	1	1	1.85732e-05	2.47987e-05	3.22655e-05	2.07068e-05	2.04537e-05	2.49521e-05	2.28898e-05	3.34727e-05	3.3652e-05	2.74549e-05	2.41308e-05	2.62207e-05	-0.243574	0.595696	Methylsuccinic acid	FA
C8H9NO2	M+H	C8H9NO2+H+	152.071	Acetaminophen, 2-Phenylglycine, Dopamine quinone, Leukoaminochrome, Methyl 2-aminobenzoate, 2-(Methylamino)benzoic acid, 2-Amino-3-methylbenzoate	HMDB0001859, HMDB0002210, HMDB0012219, HMDB0012992, HMDB0029703, HMDB0032609, HMDB0060680	1	1	1	1	1	1	1	1	0.000303537	0.000407566	0.000347319	0.000365737	0.000312146	0.000396237	0.000451208	0.000562494	0.000394492	0.000495302	0.000416702	0.000492811	-0.39954	1.4106	Dopamine quinone	PM
C9H13NO	M+H	C9H13NO+H+	152.107	Phenylpropanolamine, N-Methylphenylethanolamine, N-Methyltyramine, 1,2,3,4,5,6-Hexahydro-5-methyl-7H-cyclopenta[b]pyridin-7-one, 4-Hydroxyamphetamine	HMDB0001942, HMDB0001387, HMDB0003633, HMDB0039658, HMDB0060765	1	1	1	1	1	1	1	1	0.000128891	0.000196779	0.000291097	0.00016928	0.000191907	0.0002988	0.000235211	0.000385269	0.000380474	0.000279341	0.000286067	0.000420415	-0.637948	1.22925	N-Methyltyramine	PM
C7H8N2O2	M+H	C7H8N2O2+H+	153.066	N1-Methyl-2-pyridone-5-carboxamide, N1-Methyl-4-pyridone-3-carboxamide	HMDB0004193, HMDB0004194	1	1	1	1	1	1	1	1	0.000100972	0.00015463	0.00015174	0.000131835	0.000139528	0.000195555	0.000150819	0.000214425	0.000150096	0.000182128	0.000198311	0.000274512	-0.420731	0.860408	N1-Methyl-4-pyridone-3-carboxamide	PM
C8H11NO2	M+H	C8H11NO2+H+	154.086	Dopamine, p-Octopamine, Vanillylamine	HMDB0000073, HMDB0004825, HMDB0012309	1	1	1	1	1	1	1	1	0.000333636	0.000487056	0.000470124	0.000412747	0.000393048	0.000552483	0.000547826	0.000713394	0.000604843	0.000586258	0.000537219	0.000680418	-0.470264	1.47181	Dopamine	PM
C7H11N3O	M+H	C7H11N3O+H+	154.097	N-Acetylhistamine	HMDB0013253	1	1	1	1	1	1	1	1	1.66126e-05	2.73495e-05	2.74504e-05	2.31025e-05	2.93694e-05	4.23974e-05	3.93289e-05	6.15079e-05	3.97229e-05	4.20849e-05	4.47026e-05	5.7739e-05	-0.777769	1.42892	N-Acetylhistamine	PM
C7H6O3	M+NH4	C7H6O3+NH4+	156.066	4-Hydroxybenzoic acid, Gentisate aldehyde, 2-Methoxy-1,4-benzoquinone, keratan sulfate II (core 2-linked),degradation product 1	HMDB0000500, HMDB0004062, HMDB0032576, HMDB0062484	1	1	1	1	1	1	1	1	0.00017665	0.000217385	0.000203036	0.000207423	0.000169462	0.000198571	0.000251691	0.000268781	0.000226208	0.000247037	0.000208076	0.000227996	-0.28618	1.4106	Gentisate aldehyde	PM
C7H11NO3	M+H	C7H11NO3+H+	158.081	3-Methylcrotonylglycine, Tiglylglycine	HMDB0000459, HMDB0000959	1	1	1	1	1	1	1	1	0.000290051	0.000418101	0.000375103	0.000393461	0.000408421	0.000477607	0.000469904	0.000666666	0.0004573	0.000586652	0.000515936	0.000534841	-0.451651	1.38878	N-Acetylproline	PM
C8H12O2	M+NH4	C8H12O2+NH4+	158.118	2-octenedial, 2E,5-Hexadienyl acetate, 4-octenedial, 5,7-octadienoic acid, 2E,7-Octadienoic acid, Alepramic acid, 4-oxo-2E-Octenal, (E,E)-2-methyl-6-oxohepta-2,4-dienol, (E,E)-7-hydroxy-6-methylhepta-3,5-dienal, Ethyl 2-methyl-3,4-pentadienoate, Ethyl sorbate, 4Z,7-octadienoic acid, 2-octynoic acid, 7-octynoic acid, 2E,4E-Hexadienyl acetate, Allyl tiglate	LMFA06000037, LMFA07010177, LMFA06000038, LMFA01030442, LMFA01030795, LMFA01140031, LMFA06000129, LMFA05000562, LMFA05000563, LMFA07010858, LMFA07010882, LMFA01030441, LMFA01030577, LMFA01030578, LMFA07010180, LMFA07010779	1	1	1	1	1	1	1	1	0.000183813	0.000246642	0.000247193	0.000219234	0.000220253	0.000319457	0.000266446	0.000373313	0.000274667	0.000301285	0.000280388	0.000363417	-0.372277	1.11409	2E,7-Octadienoic acid	FA
C10H9NO	M+H	C10H9NO+H+	160.076	Indoleacetaldehyde	HMDB0001190	1	1	1	1	1	1	1	1	4.6073e-05	7.54564e-05	8.45646e-05	6.00849e-05	7.03898e-05	0.000107293	9.19812e-05	0.000118112	0.000112552	0.000103164	0.000105459	0.000151399	-0.621071	1.36729	Indoleacetaldehyde	PM
C7H13NO3	M+H	C7H13NO3+H+	160.097	2-Methylbutyrylglycine, Isovalerylglycine, Valerylglycine, N-Acetylvaline, 3-Dehydrocarnitine, 5-Acetamidovalerate, 4-Hydroxystachydrine, Turicine, Betonicine, Calystegine A6	HMDB0000339, HMDB0000678, HMDB0000927, HMDB0011757, HMDB0012154, HMDB0012175, HMDB0029230, HMDB0029409, HMDB0029412, HMDB0031345	1	1	1	1	1	1	1	1	0.000197198	0.00028282	0.000283036	0.00024364	0.000254433	0.000330602	0.000273349	0.000395061	0.000309059	0.000335193	0.000305035	0.00033756	-0.296764	1.01376	2-Methylbutyrylglycine	PM
C6H8O5	M+H	C6H8O5+H+	161.044	3-oxo-adipic acid, Oxoadipic acid	LMFA01170096, LMFA01170121	1	1	1	1	1	1	1	1	5.76344e-05	5.2887e-05	0.000110719	5.59745e-05	4.03103e-05	3.37383e-05	4.27285e-05	3.38165e-05	8.73836e-05	3.89081e-05	3.88066e-05	3.33284e-05	0.353269	0.256986	Oxoadipic acid	FA
C6H12N2O3	M+H	C6H12N2O3+H+	161.092	D-Alanyl-D-alanine, Alanyl-Alanine, 4-Acetamido-2-aminobutanoic acid	HMDB0003459, HMDB0028680, HMDB0031411	1	1	1	1	1	1	1	1	1.8834e-06	6.8275e-06	4.94124e-06	2.86995e-06	4.18675e-06	7.83706e-06	7.35402e-06	1.14052e-05	7.24075e-06	6.96991e-06	6.81757e-06	1.13722e-05	-0.841723	1.22925	D-Alanyl-D-alanine	AA
C10H12N2	M+H	C10H12N2+H+	161.107	Tryptamine	HMDB0000303	1	1	1	1	1	1	1	1	2.83897e-05	5.45849e-05	4.91131e-05	4.21993e-05	5.82667e-05	7.83238e-05	6.99068e-05	0.000108431	6.79075e-05	8.145e-05	8.73959e-05	0.000113293	-0.765241	1.38878	Tryptamine	PM
C8H16O3	M+H	C8H16O3+H+	161.117	3-Hydroxyvalproic acid, 4-Hydroxyvalproic acid, Ethyl (±)-3-hydroxyhexanoate, 7-Hydroxyoctanoic acid, Hydroxyoctanoic acid, 3-Hydroxyoctanoic acid, (R)-2-Hydroxycaprylic acid, (R)-3-Hydroxyoctanoic acid, 5-Hydroxyvalproic acid, (+/-)-Ethyl 2-hydroxy-3-methylvalerate, Peroxyoctanoic acid, Ethyl 2-hydroxy-4-methylpentanoate	HMDB0013899, HMDB0013900, HMDB0031509, HMDB0000486, HMDB0000711, HMDB0001954, HMDB0002264, HMDB0010722, HMDB0013898, HMDB0032270, HMDB0032827, HMDB0059867	1	1	1	1	1	1	1	1	0.000777931	0.000557296	0.000488847	0.000587488	0.000699168	0.000466828	0.00112578	0.000810999	0.000717168	0.000676945	0.00053642	0.00034287	-0.234907	0.245323	3-hydroxyoctanoic acid	FA
C6H11NO4	M+H	C6H11NO4+H+	162.076	Aminoadipic acid	LMFA01170098	1	1	1	1	1	1	1	1	0.000587806	0.000652564	0.000658775	0.000651124	0.000574112	0.000565018	0.000814816	0.000844014	0.000767903	0.000768452	0.000572948	0.000529545	-0.220171	0.647735	Aminoadipic acid	FA
C7H15NO3	M+H	C7H15NO3+H+	162.112	L-Carnitine	HMDB0000062	1	1	1	1	1	1	1	1	5.54686e-05	7.61548e-05	0.000141894	5.93451e-05	8.2572e-05	0.000121967	7.14347e-05	0.000113921	0.000119078	6.82104e-05	7.38267e-05	9.60134e-05	-0.0135831	0.00914928	L-Carnitine	FA
C6H10O5	M+H	C6H10O5+H+	163.06	(R)-2-ethylmalic acid, 2-Hydroxyadipic acid, 2,3-dimethylmalic acid, 2S-hydroxyadipic acid, 3-hydroxymethyl-glutaric acid, 3-hydroxy-adipic acid	LMFA01050454, LMFA01170049, LMFA01050470, LMFA01170050, LMFA01170091, LMFA01170088	1	1	1	1	1	1	1	1	0.00104424	0.000907109	0.000663795	0.00113279	0.000811102	0.000555767	0.000850984	0.000600994	0.000501167	0.000755151	0.000755772	0.000456344	0.383673	0.691123	2-Hydroxyadipic acid	FA
C9H9NO2	M+H	C9H9NO2+H+	164.071	4-(3-Pyridyl)-3-butenoic acid, 3-Methyldioxyindole	HMDB0001424, HMDB0004186	1	1	1	1	1	1	1	1	0.00141218	0.00141442	0.00103297	0.00114086	0.000448912	0.000464582	0.000701435	0.00063115	0.000537273	0.000611893	0.000378841	0.000358846	0.877307	0.897942	3-Methyldioxyindole	PM
C6H10O4	M+NH4	C6H10O4+NH4+	164.092	Methylglutaric acid, 2,2-Dimethylsuccinic acid, Adipic acid, 2-Methylglutaric acid, Monomethyl glutaric acid, (S)-2-Aceto-2-hydroxybutanoic acid, Dimethyl succinate, 4-Ethoxy-4-oxobutanoic acid	HMDB0000752, HMDB0002074, HMDB0000448, HMDB0000422, HMDB0000858, HMDB0006900, HMDB0033837, HMDB0061930	1	1	1	1	1	1	1	1	1.81487e-05	2.62693e-05	6.09502e-05	2.06418e-05	3.02592e-05	5.31987e-05	3.20988e-05	5.18395e-05	4.73682e-05	3.0823e-05	2.64876e-05	3.6803e-05	-0.105887	0.064006	Methylglutaric acid	FA
C8H5NO2	M+NH4	C8H5NO2+NH4+	165.066	Agrocybin, Indole-5,6-quinone	HMDB0030481, HMDB0006779	1	1	1	1	1	1	1	1	0.000110273	0.000126924	9.19978e-05	0.00012651	8.21189e-05	8.83989e-05	0.00011944	0.000116508	9.08521e-05	0.000120816	9.40841e-05	0.000102433	-0.0406825	0.063919	Indole-5,6-quinone	PM
C9H12N2O	M+H	C9H12N2O+H+	165.102	Kynuramine	HMDB0012246	1	1	1	1	1	1	1	1	8.87765e-05	0.000139463	0.000143407	0.000116858	0.000131201	0.000195216	0.000186765	0.000274381	0.000205797	0.000207911	0.000189494	0.00025468	-0.694743	1.49794	Kynuramine	PM
C4H4O6	M+NH4	C4H4O6+NH4+	166.035	Dihydroxyfumaric acid	HMDB0002050	1	1	1	1	1	1	1	1	6.5813e-05	9.06909e-05	0.000167961	0.000102907	0.000110901	0.000121785	0.000138229	0.000154567	0.00024098	0.000170018	0.000154106	0.000170825	-0.640194	1.2685	Dihydroxyfumaric acid	PM
C8H7NO3	M+H	C8H7NO3+H+	166.05	Formylanthranilic acid, 4-Pyridoxolactone, 5-Pyridoxolactone, Noradrenochrome	HMDB0004089, HMDB0003454, HMDB0004291, HMDB0013030	1	1	1	1	1	1	1	1	0.000108863	0.000114055	8.1174e-05	0.000110781	6.76273e-05	6.74574e-05	0.000112022	0.000101688	8.3327e-05	0.000114884	7.25163e-05	7.05177e-05	-0.0130503	0.010543	Formylanthranilic acid	PM
C9H11NO2	M+H	C9H11NO2+H+	166.086	3-Pyridinebutanoic acid, Norsalsolinol	HMDB0001007, HMDB0006044	1	1	1	1	1	1	1	1	0.000151351	0.00019567	0.000180551	0.000165341	0.000150522	0.000188321	0.000209354	0.000250906	0.000208136	0.000212512	0.000189603	0.000232422	-0.33666	1.44905	L-Phenylalanine	AA
C8H9NO3	M+H	C8H9NO3+H+	168.066	Pyridoxal, Isopyridoxal	HMDB0001545, HMDB0004290	1	1	1	1	1	1	1	1	0.000267462	0.000287895	0.000284814	0.000339819	0.000221755	0.000216436	0.000341234	0.000314537	0.000280672	0.000339777	0.000239516	0.000239067	-0.116936	0.236471	Pyridoxal	PM
C9H13NO2	M+H	C9H13NO2+H+	168.102	3-Methoxytyramine, p-Synephrine, 4-Methoxytyramine, 4-(beta-Methylaminoethyl)catechol, 4-Hydroxynorephedrine, a-Methyldopamine	HMDB0000022, HMDB0004826, HMDB0012162, HMDB0032020, HMDB0060592, HMDB0060807	1	1	1	1	1	1	1	1	0.000311635	0.000472838	0.000420364	0.000404475	0.000409986	0.000559517	0.000576567	0.000751619	0.000520401	0.000639278	0.000574864	0.000695305	-0.543269	1.49794	3-Methoxytyramine	PM
C8H12N2O2	M+H	C8H12N2O2+H+	169.097	Pyridoxamine	HMDB0001431	1	1	1	1	1	1	1	1	0.000200642	0.000341485	0.000310178	0.000285617	0.000352886	0.000500402	0.00041686	0.00060189	0.000396108	0.000501305	0.000521058	0.000674219	-0.643937	1.31163	Pyridoxamine	PM
C8H11NO3	M+H	C8H11NO3+H+	170.081	Norepinephrine, Pyridoxine, 6-Hydroxydopamine, 5-Hydroxydopamine	HMDB0000216, HMDB0000239, HMDB0001537, HMDB0004817	1	1	1	1	1	1	1	1	0.000170227	0.000195787	0.00020122	0.000199724	0.000174725	0.000195784	0.00025289	0.000266889	0.00023271	0.000248441	0.000206132	0.000218776	-0.325985	1.50811	Norepinephrine	PM
C7H11N3O2	M+H	C7H11N3O2+H+	170.092	1-Methylhistidine, 3-Methylhistidine	HMDB0000001, HMDB0000479	1	1	1	1	1	1	1	1	4.68322e-06	1.02898e-05	9.04593e-06	8.37631e-06	9.79461e-06	1.73088e-05	1.301e-05	2.43626e-05	1.61621e-05	1.62731e-05	1.70361e-05	2.20091e-05	-0.87145	1.38878	1-Methylhistidine	PM
C9H12O2	M+NH4	C9H12O2+NH4+	170.118	2-Isopropyl-1,4-benzenediol, 3-(4-Hydroxyphenyl)-1-propanol, 2-Propenyl 2,4-hexadienoate, 2,6,6-Trimethyl-2-cyclohexene-1,4-dione, 2-Isopropoxyphenol, 3-ethyl-5-methoxyphenol	HMDB0032132, HMDB0032599, HMDB0036227, HMDB0040216, HMDB0041804, HMDB0125537	1	1	1	1	1	1	1	1	0.000130124	0.000175385	0.000210145	0.000155126	0.00016938	0.000237361	0.000182077	0.000267123	0.000249794	0.000208608	0.000226589	0.000289408	-0.401828	1.08741	2,6,6-Trimethyl-2-cyclohexene-1,4-dione	PM
C11H10N2	M+H	C11H10N2+H+	171.092	2-Amino-5-phenylpyridine	HMDB0029747	1	1	1	1	1	1	1	1	9.20254e-06	1.61768e-05	1.53204e-05	1.39752e-05	1.5644e-05	2.38008e-05	2.58847e-05	3.5938e-05	2.39888e-05	3.00176e-05	2.47635e-05	3.66481e-05	-0.913143	1.60372	10-hydroperoxy-H4-neuroprostane	PM
C8H11NO2	M+NH4	C8H11NO2+NH4+	171.113	Dopamine, p-Octopamine, Vanillylamine	HMDB0000073, HMDB0004825, HMDB0012309	1	1	1	1	1	1	1	1	0.000138543	0.000212138	0.000174668	0.000183291	0.000206325	0.000273424	0.000276461	0.000367357	0.000222829	0.000303182	0.000282987	0.000352546	-0.603282	1.40764	Dopamine (Vanillylamine)	PM
C8H10O3	M+NH4	C8H10O3+NH4+	172.097	Sylvopinol, 4-Hydroxy-3-methoxybenzenemethanol, 5-ethylbenzene-1,2,3-triol, 2,4-dimethylbenzene-1,3,5-triol, 5-methoxy-4-methylbenzene-1,3-diol, 5-methoxy-2-methylbenzene-1,3-diol, 2,3-dimethoxyphenol, 1-(4-hydroxyphenyl)ethane-1,2-diol	HMDB0030570, HMDB0032012, HMDB0125534, HMDB0126617, HMDB0131231, HMDB0131232, HMDB0131479, HMDB0135785	1	1	1	1	1	1	1	1	0.000164458	0.000223269	0.000226102	0.000190381	0.00019922	0.000298806	0.000232645	0.000307736	0.000240845	0.000253137	0.00025288	0.000332176	-0.314486	0.858504	4-Hydroxy-3-methoxybenzenemethanol (Vanillyl alcohol)	PM
C7H12N2O3	M+H	C7H12N2O3+H+	173.092	Glycylproline, Prolylglycine	HMDB0000721, HMDB0011178	1	1	1	1	1	1	1	1	2.10519e-05	3.90252e-05	2.88509e-05	2.77494e-05	3.28288e-05	4.54603e-05	4.1943e-05	5.91162e-05	3.57808e-05	4.47302e-05	4.50464e-05	5.78285e-05	-0.544924	1.22925	Glycylproline	PM
C11H12N2	M+H	C11H12N2+H+	173.107	1,2,3,4-Tetrahydro-beta-carboline	HMDB0012488	1	1	1	1	1	1	1	1	1.93971e-05	3.309e-05	2.33499e-05	2.48307e-05	3.25075e-05	4.98925e-05	5.01261e-05	8.15827e-05	4.21192e-05	5.41624e-05	5.09462e-05	6.71081e-05	-0.918581	1.4106	1,2,3,4-Tetrahydro-beta-carboline	PM
C7H11NO4	M+H	C7H11NO4+H+	174.076	N-Acetyl-L-glutamate 5-semialdehyde	HMDB0006488	1	1	1	1	1	1	1	1	0.000201602	0.000222516	0.000221466	0.000193742	0.000158252	0.000180842	0.000254972	0.000263134	0.00024541	0.00021654	0.000175307	0.000185321	-0.186116	0.535908	N-Acetyl-L-glutamate 5-semialdehyde	PM
C8H15NO3	M+H	C8H15NO3+H+	174.112	Hexanoylglycine, Isovalerylalanine, Isovalerylsarcosine, N-Acetylleucine	HMDB0000701, HMDB0000747, HMDB0002087, HMDB0011756	1	1	1	1	1	1	1	1	0.000293988	0.000513694	0.000457672	0.000360523	0.000473628	0.000706244	0.000470831	0.00069201	0.000463759	0.000568049	0.000603789	0.000685463	-0.312318	0.59721	N-Acetylleucine	PM
C10H9NO2	M+H	C10H9NO2+H+	176.071	Indoleacetic acid, 5-Hydroxyindoleacetaldehyde	HMDB0000197, HMDB0004073	1	1	1	1	1	1	1	1	1.01064e-05	1.4021e-05	1.61073e-05	1.38628e-05	8.44388e-06	1.05377e-05	1.57951e-05	1.84679e-05	1.85721e-05	1.64489e-05	1.13573e-05	1.33844e-05	-0.363599	0.856898	Indoleacetic acid	PM
C7H13NO4	M+H	C7H13NO4+H+	176.092	N-Carboxyethyl-g-aminobutyric acid	HMDB0002201	1	1	1	1	1	1	1	1	8.74575e-05	0.000121083	0.000161494	9.77441e-05	0.000103774	0.000143472	0.000137842	0.000174571	0.000180545	0.000138256	0.000133342	0.000159016	-0.369233	0.991566	N-Carboxyethyl-g-aminobutyric acid	PM
C8H14O3	M+NH4	C8H14O3+NH4+	176.128	6-Ethyl-1-methyl-2,7,8-trioxabicyclo[3.2.1]octane, cis-4-Hydroxycyclohexylacetic acid, trans-4-Hydroxycyclohexylacetic acid, Alpha-Ketooctanoic acid, 3-Oxooctanoic acid, Tetrahydrofurfuryl propionate, Ethyl 3-oxohexanoate, 1-Methyl-2-oxopropyl butyrate, 2-n-Propyl-4-oxopentanoic acid, 3-Oxovalproic acid	HMDB0030303, HMDB0000451, HMDB0000909, HMDB0013211, HMDB0010721, HMDB0031177, HMDB0031307, HMDB0036230, HMDB0060683, HMDB0060685	1	1	1	1	1	1	1	1	0.00263809	0.00227118	0.00108712	0.000808427	0.00121101	0.00123434	0.00227008	0.00226269	0.00138313	0.000867735	0.000931835	0.000868735	0.107794	0.0557267	trans-4-Hydroxycyclohexylacetic acid	PM
C10H12N2O	M+H	C10H12N2O+H+	177.102	Serotonin, Cotinine	HMDB0000259, HMDB0001046	1	1	1	1	1	1	1	1	7.60683e-05	0.000123166	9.87294e-05	0.000108914	0.000123067	0.000158267	0.000170423	0.00022415	0.000137073	0.000194251	0.000175418	0.000211231	-0.69294	1.50811	Serotonin	PM
C10H11NO2	M+H	C10H11NO2+H+	178.086	5-Hydroxytryptophol, 1,2-Dehydrosalsolinol	HMDB0001855, HMDB0012490	1	1	1	1	1	1	1	1	7.77771e-05	8.45581e-05	6.89532e-05	6.83866e-05	5.34913e-05	6.7744e-05	9.14139e-05	9.4876e-05	7.56209e-05	7.82832e-05	6.54762e-05	8.31739e-05	-0.215861	0.720378	5-Hydroxytryptophol	PM
C9H7NO2	M+NH4	C9H7NO2+NH4+	179.082	2-Indolecarboxylic acid, 4,6-Dihydroxyquinoline, 3-Formyl-6-hydroxyindole	HMDB0002285, HMDB0004077, HMDB0031172	1	1	1	1	1	1	1	1	2.35784e-05	3.46605e-05	3.13475e-05	3.16842e-05	2.44964e-05	3.35585e-05	3.5301e-05	4.77507e-05	3.6e-05	3.92545e-05	3.48603e-05	4.68973e-05	-0.420838	1.35166	4,6-Dihydroxyquinoline	PM
C9H9NO3	M+H	C9H9NO3+H+	180.066	Hippuric acid, 1-(4-Methoxyphenyl)-2-nitroethylene, 3-Succinoylpyridine, Adrenochrome, Methyl n-formylanthranilate	HMDB0000714, HMDB0032595, HMDB0000992, HMDB0012884, HMDB0032398	1	1	1	1	1	1	1	1	2.49474e-05	2.71392e-05	2.62519e-05	2.65263e-05	1.31229e-05	1.75788e-05	2.37766e-05	2.57771e-05	2.20279e-05	2.57986e-05	1.40404e-05	1.77667e-05	0.0695342	0.0658958	Adrenochrome	PM
C6H13NO5	M+H	C6H13NO5+H+	180.087	Glucosamine, Fructosamine, beta-D-Glucosamine	HMDB0001514, HMDB0002030, HMDB0030091	1	1	1	1	1	1	1	1	0.00239062	0.0024285	0.00300122	0.00246758	0.00188094	0.00197586	0.00286727	0.00280514	0.00338229	0.00256786	0.00194492	0.00188943	-0.127989	0.20202	Glucosamine	PM
C10H10O2	M+NH4	C10H10O2+NH4+	180.102	4,5-Dihydro-1-benzoxepin-3(2H)-one, 3-(4-Methoxyphenyl)-2-propenal, 4-(3-hydroxyphenyl)but-3-en-2-one, (2E)-2-methyl-3-phenylprop-2-enoic acid, (2Z)-2-(hydroxymethyl)-3-phenylprop-2-enal, (2Z)-3-(3-hydroxyphenyl)-2-methylprop-2-enal, (2Z)-3-(4-hydroxyphenyl)-2-methylprop-2-enal, 2-methyl-3-phenyloxirane-2-carbaldehyde, (2Z)-3-(2-hydroxyphenyl)-2-methylprop-2-enal, (3E)-1-hydroxy-4-phenylbut-3-en-…	HMDB0029714, HMDB0032611, HMDB0133504, HMDB0133594, HMDB0133595, HMDB0133596, HMDB0133597, HMDB0133598, HMDB0133599, HMDB0133747, HMDB0133748, HMDB0133749, HMDB0133750, HMDB0133751, HMDB0133752, HMDB0133755, HMDB0135643, HMDB0141046, HMDB0141158	1	1	1	1	1	1	1	1	8.68611e-05	0.000104194	0.000108139	9.69697e-05	9.10941e-05	0.000115321	0.000129044	0.000156474	0.000131622	0.00013562	0.000119602	0.000143889	-0.437864	1.60372	(1,2-Diacetylbenzene) or maybe alpha-Methylphenylalanine	PM
C9H12N2O2	M+H	C9H12N2O2+H+	181.097	5-Hydroxykynurenamine, Tyrosinamide, L-2-Amino-3-(4-aminophenyl)propanoic acid, (4-Ethoxyphenyl)urea	HMDB0004076, HMDB0013319, HMDB0030397, HMDB0032565	1	1	1	1	1	1	1	1	7.45191e-05	0.000111481	0.000106527	9.73641e-05	0.000101865	0.000142713	0.000137566	0.000186806	0.000132012	0.000153456	0.000146217	0.000184752	-0.568354	1.44905	5-Hydroxykynurenamine	PM
C9H11NO3	M+H	C9H11NO3+H+	182.081	L-Tyrosine, 4-Hydroxy-4-(3-pyridyl)-butanoic acid, L-Threo-3-Phenylserine, Beta-Tyrosine, o-Tyrosine	HMDB0000158, HMDB0001119, HMDB0002184, HMDB0003831, HMDB0006050	1	1	1	1	1	1	1	1	0.000127348	0.000136608	0.000107841	0.000114044	5.85033e-05	6.95824e-05	0.000102426	0.000101397	8.41885e-05	9.26558e-05	6.69488e-05	6.76677e-05	0.252698	0.349481	L-Tyrosine	AA
C10H12O2	M+NH4	C10H12O2+NH4+	182.118	1-Phenylethyl acetate, Benzenebutanoic acid, 3-Phenylbutyric acid, Methyl 3-phenylpropanoate, Benzyl propionate, Propyl benzoate, Isopropyl benzoate, 3-Hydroxy-4-phenylbutan-2-one, 3-(4-Methoxyphenyl)-2-propen-1-ol, Ethyl phenylacetate, Thymoquinone, 4-Isopropylbenzoic acid, 1-ethenyl-3,5-dimethoxybenzene, 4-(3-hydroxyphenyl)butan-2-one, 2-hydroxy-2-methyl-3-phenylpropanal, 2-benzyl-3-hydroxyprop…	HMDB0032620, HMDB0000543, HMDB0001955, HMDB0030060, HMDB0030063, HMDB0031761, HMDB0032038, HMDB0032336, HMDB0032586, HMDB0032618, HMDB0034732, HMDB0035268, HMDB0127494, HMDB0133507, HMDB0133600, HMDB0133601, HMDB0133603, HMDB0133604, HMDB0133605, HMDB0133606, HMDB0133607, HMDB0133608, HMDB0133609, HMDB0133610, HMDB0133617, HMDB0133725, HMDB0133727, HMDB0133729, HMDB0133753, HMDB0133754, HMDB01357…	1	1	1	1	1	1	1	1	9.41588e-05	0.000135812	0.000161662	0.000116673	0.000117919	0.000167914	0.000161232	0.000221247	0.000187891	0.000172539	0.000162707	0.000200635	-0.478218	1.38878	Phenyl butyrate	PM
C9H12N2O	M+NH4	C9H12N2O+NH4+	182.129	Kynuramine	HMDB0012246	1	1	1	1	1	1	1	1	4.06705e-05	4.13975e-05	1.9115e-05	2.66342e-05	2.8529e-05	3.42975e-05	7.56963e-05	8.29722e-05	3.44898e-05	4.64302e-05	3.55177e-05	4.10629e-05	-0.729817	0.856898	Kynuramine	PM
C8H9NO4	M+H	C8H9NO4+H+	184.06	4-Pyridoxic acid	HMDB0000017	1	1	1	1	1	1	1	1	5.38353e-05	6.1735e-05	4.87797e-05	6.11674e-05	3.68555e-05	3.92042e-05	6.30558e-05	5.62716e-05	4.83027e-05	6.25464e-05	4.1684e-05	4.14782e-05	-0.0551953	0.0658958	4-Pyridoxic acid	PM
C9H13NO3	M+H	C9H13NO3+H+	184.097	Epinephrine, Normetanephrine, Methylnoradrenaline, Ginkgotoxin	HMDB0000068, HMDB0000819, HMDB0002832, HMDB0029455	1	1	1	1	1	1	1	1	9.24639e-05	0.000125992	0.000127547	0.000114363	0.000108136	0.000134309	0.000147495	0.000178115	0.000153146	0.000163647	0.000137696	0.000159713	-0.419237	1.60372	Epinephrine	PM
C10H14O2	M+NH4	C10H14O2+NH4+	184.133	Perillic acid, Wine lactone, 6-Pentyl-2H-pyran-2-one, 2-tert-Butyl-1,4-benzenediol, 2-Methoxy-4-propylphenol, Pentyl 2-furyl ketone, 1,1-Dimethoxy-2-phenylethane, alpha-Teresantalic acid, Epinepetalactone, 2,4,7-Decatrienoic acid, Isomintlactone, 1,4-Epidioxy-p-mentha-2,8-diene, 1,2:3,4-Diepoxy-p-menth-8-ene, 5-Hydroxy-p-mentha-6,8-dien-2-one, 2-Hydroxy-p-mentha-1,8-dien-6-one, Rotundifolone, (1x…	HMDB0004586, HMDB0029691, HMDB0031085, HMDB0032062, HMDB0032135, HMDB0032462, HMDB0032615, HMDB0034922, HMDB0035063, HMDB0035235, HMDB0036084, HMDB0036878, HMDB0036879, HMDB0037011, HMDB0037012, HMDB0037044, HMDB0039382, HMDB0041584, HMDB0127496, HMDB0135742	1	1	1	1	1	1	1	1	5.79999e-05	6.84096e-05	0.00011371	6.61412e-05	7.44677e-05	9.57335e-05	8.29042e-05	0.000112852	0.000137668	8.63236e-05	9.45008e-05	0.000122103	-0.417463	0.879388	Perillic acid	PR
C9H13NO2	M+NH4	C9H13NO2+NH4+	185.128	3-Methoxytyramine, p-Synephrine, 4-Methoxytyramine, 4-(beta-Methylaminoethyl)catechol, 4-Hydroxynorephedrine, a-Methyldopamine	HMDB0000022, HMDB0004826, HMDB0012162, HMDB0032020, HMDB0060592, HMDB0060807	1	1	1	1	1	1	1	1	7.21745e-05	0.000115501	9.85116e-05	9.53932e-05	0.000113254	0.000149056	0.00015266	0.000204032	0.000137213	0.000164565	0.000158751	0.000193418	-0.65038	1.50811	4-Hydroxynorephedrine	PM
C8H8O4	M+NH4	C8H8O4+NH4+	186.076	3-Hydroxymandelic acid, 2',4',6'-Trihydroxyacetophenone, 3,4-Dihydroxymandelaldehyde, 2,6-Dimethoxy-1,4-benzoquinone, Homogentisic acid, p-Hydroxymandelic acid, 3,4-Dihydroxybenzeneacetic acid, 3-hydroxy-5-methoxybenzoic acid, 2-hydroxy-4-methoxybenzoic acid, 3-hydroxy-2-methoxybenzoic acid	HMDB0000750, HMDB0029644, HMDB0006242, HMDB0029673, HMDB0000130, HMDB0000822, HMDB0001336, HMDB0125536, HMDB0131176, HMDB0140902	1	1	1	1	1	1	1	1	0.000232051	0.000251345	0.000233959	0.000297561	0.000184572	0.000181962	0.000307955	0.000300534	0.000242601	0.000303792	0.000213833	0.00019599	-0.179708	0.355165	3,4-Dihydroxybenzeneacetic acid (DOPAC)	PM
C8H13NO4	M+H	C8H13NO4+H+	188.092	2-Keto-6-acetamidocaproate	HMDB0012150	1	1	1	1	1	1	1	1	0.000104081	0.000114698	0.00012207	0.000113433	0.000111693	0.000120491	0.000162227	0.000166092	0.000147288	0.00014941	0.000128873	0.000129829	-0.364397	1.49794	2-Keto-6-acetamidocaproate	PM
C12H16N2	M+H	C12H16N2+H+	189.139	Dimethyltryptamine	HMDB0005973	1	1	1	1	1	1	1	1	1.87834e-05	2.83101e-05	1.75899e-05	2.39878e-05	2.90134e-05	3.78319e-05	5.42953e-05	8.74429e-05	3.88551e-05	5.66485e-05	3.9464e-05	4.74882e-05	-1.05979	1.31163	Dimethyltryptamine	PM
C11H11NO2	M+H	C11H11NO2+H+	190.086	Indole-3-propionic acid, Indole-3-methyl acetate	HMDB0002302, HMDB0029738	1	1	1	1	1	1	1	1	4.33624e-05	6.53939e-05	5.44421e-05	5.6856e-05	5.89458e-05	7.84077e-05	7.42511e-05	9.34976e-05	6.53676e-05	8.04083e-05	8.33005e-05	0.000100987	-0.478029	1.36729	Indole-3-propionic acid	PM
C9H16O3	M+NH4	C9H16O3+NH4+	190.144	Tetrahydrofurfuryl butyrate, 9-Oxo-nonanoic acid	HMDB0036188, HMDB0094711	1	1	1	1	1	1	1	1	0.00492348	0.00365578	0.00305644	0.00345549	0.00408283	0.00288737	0.0072687	0.00549403	0.00470789	0.00424481	0.00319481	0.00206591	-0.29016	0.293756	9-Oxo-nonanoic acid	FA
C10H7NO2	M+NH4	C10H7NO2+NH4+	191.082	Quinaldic acid	HMDB0000842	1	1	1	1	1	1	1	1	3.73343e-06	1.04347e-05	9.94652e-06	8.35689e-06	7.16924e-06	1.16051e-05	1.01846e-05	1.58212e-05	1.06027e-05	1.3311e-05	1.23613e-05	1.62374e-05	-0.615592	1.23193	Quinaldic acid	PM
C11H14N2O	M+H	C11H14N2O+H+	191.118	5-Methoxytryptamine, N-Methylserotonin, Alline	HMDB0004095, HMDB0004369, HMDB0030533	1	1	1	1	1	1	1	1	5.77008e-05	9.28095e-05	7.07742e-05	7.74593e-05	9.66607e-05	0.000121591	0.000132933	0.000182004	0.000108187	0.000144323	0.000135458	0.000156892	-0.733844	1.50811	5-Methoxytryptamine	PM
C7H10O5	M+NH4	C7H10O5+NH4+	192.087	Shikimic acid, 2-Isopropyl-3-oxosuccinate, 3,4,5-trihydroxycyclohex-1-ene-1-carboxylic acid	HMDB0003070, HMDB0012149, HMDB0130150	1	1	1	1	1	1	1	1	0.00111711	0.00121694	0.00127168	0.00100269	0.000821817	0.000920658	0.0012632	0.00127925	0.00137232	0.00107101	0.000842988	0.000864087	-0.0756625	0.10506	Shikimic acid	PM
C11H13NO2	M+H	C11H13NO2+H+	192.102	5-Methoxytryptophol	HMDB0001896	1	1	1	1	1	1	1	1	7.85719e-05	8.59265e-05	7.95375e-05	8.82426e-05	7.10103e-05	9.11549e-05	0.000109952	0.000118067	8.92505e-05	0.000104252	9.29699e-05	0.000113391	-0.344689	1.43988	5-Methoxytryptophol	PM
C8H14O4	M+NH4	C8H14O4+NH4+	192.123	Suberic acid, Ethyladipic acid, 3-Methylpimelic acid, Diethyl succinate, Dimethyl adipate, 2-Propylglutaric acid, 2,4-Dimethyladipic acid	HMDB0000893, HMDB0002023, HMDB0059757, HMDB0033838, HMDB0041606, HMDB0060684, HMDB0059727	1	1	1	1	1	1	1	1	3.04125e-05	3.2291e-05	4.30925e-05	1.97134e-05	2.49736e-05	3.41252e-05	3.04773e-05	4.07797e-05	4.06215e-05	2.27667e-05	2.35135e-05	2.96501e-05	-0.0247977	0.0188123	Suberic acid	FA
C9H18O3	M+NH4	C9H18O3+NH4+	192.159	(R)-2-hydroxynonanoic acid, 2-hydroxy pelargonic acid, (+)-3-hydroxy pelargonic acid, 4-hydroxy pelargonic acid, 7-hydroxy pelargonic acid, 9-hydroxy pelargonic acid, 8R-hydroxy-nonanoic acid, 6-hydroxy-nonanoic acid, 8-hydroxy-nonanoic acid	LMFA01050456, LMFA01050024, LMFA01050025, LMFA01050026, LMFA01050027, LMFA01050028, LMFA01050275, LMFA01050230, LMFA01050231	1	1	1	1	1	1	1	1	1.45817e-05	2.42886e-05	2.65583e-05	1.57375e-05	2.53597e-05	3.25781e-05	2.51948e-05	3.96706e-05	3.69513e-05	2.20711e-05	3.10571e-05	3.27213e-05	-0.432006	0.83913	3-HYDROXYNONANOIC ACID	FA
C10H11NO3	M+H	C10H11NO3+H+	194.081	p-Methylhippuric acid, Phenylacetylglycine, Methyl hippurate, 2-Methylhippuric acid, m-Methylhippuric acid, Methyl n-acetylanthranilate, 4-Hydroxy-5-phenyltetrahydro-1,3-oxazin-2-one, 3-Carbamoyl-2-phenylpropionaldehyde, 4-Anilino-4-oxobutanoic acid	HMDB0013292, HMDB0000821, HMDB0000859, HMDB0011723, HMDB0013245, HMDB0032388, HMDB0060389, HMDB0060366, HMDB0060758	1	1	1	1	1	1	1	1	3.35361e-05	3.96614e-05	3.515e-05	3.68961e-05	2.68235e-05	3.02518e-05	4.87187e-05	4.8397e-05	4.24139e-05	4.36294e-05	2.9999e-05	3.04589e-05	-0.267982	0.655519	Phenylacetylglycine	PM
C10H13NO3	M+H	C10H13NO3+H+	196.097	N-Acetyldopamine, 2-Phenyl-1,3-propanediol monocarbamate	HMDB0041943, HMDB0060351	1	1	1	1	1	1	1	1	2.05851e-05	3.25502e-05	3.72003e-05	2.42246e-05	2.17925e-05	3.57975e-05	3.11694e-05	4.57435e-05	3.94751e-05	3.33422e-05	3.23317e-05	4.39182e-05	-0.392529	0.932791	N-Acetyldopamine	PM
C9H11NO4	M+H	C9H11NO4+H+	198.076	L-Dopa, DL-Dopa	HMDB0000181, HMDB0000609	1	1	1	1	1	1	1	1	2.23583e-05	2.4612e-05	2.21376e-05	2.5828e-05	1.41884e-05	1.80129e-05	3.38444e-05	3.28067e-05	2.34014e-05	3.1384e-05	1.57043e-05	1.86506e-05	-0.29323	0.443177	L-Dopa	PM
C6H12O6	M+NH4	C6H12O6+NH4+	198.097	D-Glucose, myo-Inositol, L-Sorbose, D-Galactose, D-Mannose, 3-Deoxyarabinohexonic acid, Beta-D-Glucose, D-Fructose, Allose, Alpha-D-Glucose, D-Tagatose, Beta-D-Galactose, Dihydroxyacetone (dimer), 2,5-bis(hydroxymethyl)oxolane-2,3,4-triol	HMDB0000122, HMDB0000211, HMDB0001266, HMDB0000143, HMDB0000169, HMDB0000346, HMDB0000516, HMDB0000660, HMDB0001151, HMDB0003345, HMDB0003418, HMDB0003449, HMDB0032222, HMDB0125599	1	1	1	1	1	1	1	1	0.000257738	0.000260591	0.000297	0.000259227	0.00020718	0.000174792	0.000287353	0.000278363	0.000348591	0.000267644	0.000225064	0.000184288	-0.127676	0.205807	D-Glucose	PM
C10H15NO3	M+H	C10H15NO3+H+	198.112	Metanephrine, Desglymidodrine	HMDB0004063, HMDB0060558	1	1	1	1	1	1	1	1	5.66959e-05	7.75079e-05	7.91629e-05	7.21935e-05	6.75065e-05	8.87807e-05	7.92266e-05	0.000111253	8.23283e-05	8.90202e-05	8.21505e-05	0.000104587	-0.312116	1.05319	Metanephrine	PM
C9H15N3O2	M+H	C9H15N3O2+H+	198.124	L-Histidine trimethylbetaine	HMDB0029422	1	1	1	1	1	1	1	1	8.09707e-06	1.98161e-05	1.37931e-05	1.70066e-05	1.96547e-05	2.87415e-05	2.55112e-05	4.2662e-05	2.00941e-05	2.90712e-05	3.01694e-05	3.60839e-05	-0.77742	1.24469	L-Histidine trimethylbetaine	PM
C9H10O5	M+H	C9H10O5+H+	199.06	Vanillylmandelic acid, 3-(3,4-Dihydroxyphenyl)lactic acid, 3-(3,4,5-trihydroxyphenyl)propanoic acid, 2-(2,5-dihydroxy-4-methoxyphenyl)acetic acid, 2-(2,3,4-trihydroxyphenyl)propanoic acid, 2-hydroxy-3,4-dimethoxybenzoic acid, 4-hydroxy-2,3-dimethoxybenzoic acid, 2-(2,4,5-trihydroxyphenyl)propanoic acid, 3-(2,4-dihydroxyphenyl)-3-hydroxypropanoic acid, 3-(2,4,5-trihydroxyphenyl)propanoic acid, 2-(…	HMDB0000291, HMDB0003503, HMDB0125529, HMDB0130476, HMDB0137823, HMDB0142084, HMDB0142087, HMDB0125024, HMDB0126478, HMDB0126489, HMDB0131426, HMDB0133489, HMDB0137136, HMDB0140947	1	1	1	1	1	1	1	1	2.51979e-05	2.6984e-05	2.99317e-05	2.58944e-05	1.27834e-05	1.90497e-05	1.7435e-05	1.60425e-05	1.81276e-05	1.44376e-05	7.4446e-06	9.37124e-06	0.755067	1.24469	Vanillylmandelic acid	PM
C9H13NO3	M+NH4	C9H13NO3+NH4+	201.123	Epinephrine, Normetanephrine, Methylnoradrenaline, Ginkgotoxin	HMDB0000068, HMDB0000819, HMDB0002832, HMDB0029455	1	1	1	1	1	1	1	1	1.52885e-05	2.81963e-05	1.88166e-05	2.67137e-05	2.63928e-05	3.51166e-05	3.38429e-05	5.08119e-05	2.74332e-05	3.86792e-05	3.23786e-05	4.2753e-05	-0.585679	1.18595	Normetanephrine	PM
C9H12O4	M+NH4	C9H12O4+NH4+	202.107	Vanylglycol, Genipic acid, 4-Formyl-3-(formylmethyl)-4-hexenoic acid, 3,4-Methylenepimelic acid, 4-ethyl-6-methoxybenzene-1,2,3-triol, 5-ethyl-3-methoxybenzene-1,2,4-triol, 2-(hydroxymethyl)-5-methoxy-4-methylbenzene-1,3-diol, 4-(hydroxymethyl)-5-methoxy-2-methylbenzene-1,3-diol, 6-methoxy-3,5-dimethylbenzene-1,2,4-triol, 2-(hydroxymethyl)-3,5-dimethoxyphenol	HMDB0001490, HMDB0036072, HMDB0039650, HMDB0059730, HMDB0125593, HMDB0125597, HMDB0126618, HMDB0126619, HMDB0126620, HMDB0131233	1	1	1	1	1	1	1	1	6.97243e-05	7.92015e-05	0.000113215	7.70792e-05	7.49996e-05	8.95562e-05	9.25736e-05	0.000100761	0.000130802	9.38946e-05	8.85742e-05	9.54433e-05	-0.2571	0.713687	Vanylglycol	PM
C10H19NO3	M+H	C10H19NO3+H+	202.144	Capryloylglycine, Valproylglycine	HMDB0000832, HMDB0013116	1	1	1	1	1	1	1	1	0.000102672	9.4586e-05	9.20159e-05	9.08466e-05	9.88269e-05	8.77691e-05	0.000129949	0.000129454	0.000112906	9.88309e-05	9.0511e-05	7.82562e-05	-0.175238	0.447903	Valproylglycine	PM
C12H11NO	M+NH4	C12H11NO+NH4+	203.118	4-Hydroxydiphenylamine	HMDB0032597	1	1	1	1	1	1	1	1	7.51537e-06	1.64668e-05	1.05947e-05	1.21663e-05	1.71757e-05	2.84379e-05	2.70669e-05	4.31426e-05	2.0471e-05	3.04422e-05	3.04021e-05	4.08652e-05	-1.05874	1.4106	N-hydroxy-4-aminobiphenyl	PM
C7H12N2O5	M+H	C7H12N2O5+H+	205.082	L-beta-aspartyl-L-alanine, gamma-Glutamylglycine, Alanyl-Aspartic acid, Aspartyl-Alanine, Glutamylglycine	HMDB0011162, HMDB0011667, HMDB0028683, HMDB0028746, HMDB0028819	1	1	1	1	1	1	1	1	3.72181e-05	4.12517e-05	4.1217e-05	4.45847e-05	2.75641e-05	2.37283e-05	4.57259e-05	4.04798e-05	4.99125e-05	4.45621e-05	2.45846e-05	1.77862e-05	-0.0492584	0.0369653	Glutamylglycine	AA
C11H12N2O2	M+H	C11H12N2O2+H+	205.097	3-Hydroxymethylantipyrine, D-Tryptophan, (±)-Tryptophan, S-nirvanol, Nirvanol, 4-Hydroxyantipyrine	HMDB0013840, HMDB0013609, HMDB0030396, HMDB0060967, HMDB0060533, HMDB0060878	1	1	1	1	1	1	1	1	1.15155e-05	1.80486e-05	1.56583e-05	1.69578e-05	1.91365e-05	2.72675e-05	2.38529e-05	3.23108e-05	2.15485e-05	2.68262e-05	2.56707e-05	3.68608e-05	-0.621639	1.28805	D-Tryptophan or L-Tryptophan (not listed, but more relevant to brain)	AA
C9H16O4	M+NH4	C9H16O4+NH4+	206.139	Nonate, (+/-)-Ethyl 3-acetoxy-2-methylbutyrate, Azelaic acid, cis- and trans-Ethyl 2,4-dimethyl-1,3-dioxolane-2-acetate, (+/-)-Methyl 5-acetoxyhexanoate, 2,4-Dimethylpimelic acid, 3-Methylsuberic acid, Diethyl methylsuccinate, Diethyl glutarate	HMDB0011717, HMDB0032258, HMDB0000784, HMDB0032200, HMDB0032387, HMDB0059760, HMDB0059783, HMDB0059814, HMDB0059879	1	1	1	1	1	1	1	1	0.000169609	0.000175657	0.000226358	0.000136064	0.000170411	0.000200699	0.000186495	0.000217518	0.000195671	0.000156019	0.000146048	0.000146814	0.0410092	0.0581155	Azelaic acid	FA
C10H20O3	M+NH4	C10H20O3+NH4+	206.175	3-Hydroxycapric acid, (R)-3-Hydroxydecanoic acid, (1R,2R,4R,8R)-p-Menthane-2,8,9-triol, 7-Methyl-3-methylene-1,6,7-octanetriol, cis-p-Menthane-1,7,8-triol, 2,6-Dimethyl-7-octene-2,3,6-triol, (1S,2S,4R,8R)-p-Menthane-1,2,9-triol, 2-Hexyl-1,3-dioxolane-4-methanol, (1R,2R,4S)-p-Menthane-1,2,8-triol, xi-5-Hydroxydecanoic acid, Ethyl (±)-3-hydroxyoctanoate	HMDB0002203, HMDB0010725, HMDB0033574, HMDB0033640, HMDB0034783, HMDB0038186, HMDB0039470, HMDB0039669, HMDB0039893, HMDB0040329, HMDB0041600	1	1	1	1	1	1	1	1	1.73248e-05	2.34003e-05	1.61005e-05	1.37429e-05	2.40221e-05	3.21935e-05	3.3629e-05	4.46893e-05	2.7342e-05	2.33967e-05	3.35642e-05	2.95695e-05	-0.600164	1.12175	3-Hydroxycapric acid	FA
C10H7NO3	M+NH4	C10H7NO3+NH4+	207.076	Kynurenic acid	HMDB0000715	1	1	1	1	1	1	1	1	6.7416e-05	7.09666e-05	4.67938e-05	6.64246e-05	2.17958e-05	2.34438e-05	3.04378e-05	2.93291e-05	2.03404e-05	3.11218e-05	1.65518e-05	1.72565e-05	1.03326	0.986526	Kynurenic acid	PM
C12H17NO2	M+H	C12H17NO2+H+	208.133	O-Methylcorypalline	HMDB0029370	1	1	1	1	1	1	1	1	6.47369e-06	1.23872e-05	3.53516e-05	8.99446e-06	1.02062e-05	1.99255e-05	1.77322e-05	2.60752e-05	4.47883e-05	1.52691e-05	1.52721e-05	2.43612e-05	-0.620486	0.45837	6,7-Dimethoxy-2-methyl-1,2,3,4-tetrahydro-isoquinoline	PM
C10H12N2O3	M+H	C10H12N2O3+H+	209.092	L-Kynurenine, Formyl-5-hydroxykynurenamine, 4-Aminobenzoyl-(beta)-alanine	HMDB0000684, HMDB0012948, HMDB0060757	1	1	1	1	1	1	1	1	1.87236e-05	2.86845e-05	2.762e-05	2.5887e-05	2.47211e-05	3.36539e-05	4.0828e-05	5.17929e-05	3.69042e-05	4.36833e-05	3.52169e-05	4.18281e-05	-0.651733	1.60372	L-Kynurenine	PM
C10H10O5	M+H	C10H10O5+H+	211.06	Vanilpyruvic acid, 3-(4-hydroxy-3-methoxyphenyl)oxirane-2-carboxylic acid, (2E)-3-(2,4-dihydroxy-3-methoxyphenyl)prop-2-enoic acid, (2E)-3-(2,4-dihydroxy-5-methoxyphenyl)prop-2-enoic acid, 3-(3,4-dihydroxy-5-methoxyphenyl)prop-2-enoic acid, 3-(2,4-dihydroxy-5-methoxyphenyl)prop-2-enoic acid, 3-(2,4-dihydroxy-3-methoxyphenyl)prop-2-enoic acid, 3-(2,3-dihydroxy-4-methoxyphenyl)prop-2-enoic acid, 3-…	HMDB0011714, HMDB0125516, HMDB0125515, HMDB0125514, HMDB0127490, HMDB0127946, HMDB0127947, HMDB0132221, HMDB0132228, HMDB0140909, HMDB0141258, HMDB0141331, HMDB0142176, HMDB0142177, HMDB0142178, HMDB0142180, HMDB0142181	1	1	1	1	1	1	1	1	2.70499e-05	2.84816e-05	2.79017e-05	2.65154e-05	1.35519e-05	1.99528e-05	2.00862e-05	1.72455e-05	1.79395e-05	1.98975e-05	8.04901e-06	9.33828e-06	0.632183	1.09412	Vanilpyruvic acid	PM
C11H15NO2	M+NH4	C11H15NO2+NH4+	211.144	(R)-N-Methylsalsolinol, (S)-N-Methylsalsolinol, (-)-Salsoline, (R)-1,2-dimethyl-5,6-dihydroxy-tetrahydroisoquinoline, 2-Isopropylphenyl methylcarbamate	HMDB0003626, HMDB0003892, HMDB0012469, HMDB0012484, HMDB0031797	1	1	1	1	1	1	1	1	9.91653e-05	0.000157743	0.000139218	0.000133342	0.000159725	0.000221388	0.000194377	0.000281722	0.000181895	0.000228225	0.000236246	0.000286865	-0.63015	1.38878	(R)-N-Methylsalsolinol	PM
C10H13NO4	M+H	C10H13NO4+H+	212.092	3-Methoxytyrosine, Methyldopa, 3-O-Methyl-a-methyldopa	HMDB0001434, HMDB0011754, HMDB0060747	1	1	1	1	1	1	1	1	1.9976e-05	2.50421e-05	2.5768e-05	2.63276e-05	2.14558e-05	2.40838e-05	3.57404e-05	3.5271e-05	2.68009e-05	3.53991e-05	2.92108e-05	2.62312e-05	-0.403224	1.38878	3-Methoxytyrosine	PM
C10H18N2O3	M+H	C10H18N2O3+H+	215.139	Dethiobiotin, Prolyl-Valine, Valyl-Proline	HMDB0003581, HMDB0029030, HMDB0029135	1	1	1	1	1	1	1	1	5.83147e-05	5.7782e-05	4.33167e-05	4.80486e-05	4.11139e-05	4.09038e-05	7.08881e-05	7.00114e-05	5.36616e-05	5.90267e-05	4.38202e-05	4.29784e-05	-0.233711	0.500396	Dethiobiotin	PM
C10H9N5O	M+H	C10H9N5O+H+	216.088	Kinetin	HMDB0012245	1	1	1	1	1	1	1	1	0.000119067	0.000119309	5.95381e-05	0.000112178	6.09976e-05	3.49593e-05	4.03165e-05	3.68668e-05	2.73032e-05	4.2553e-05	3.95987e-05	2.13843e-05	1.28254	1.15903	Kinetin	PM
C13H15NO2	M+H	C13H15NO2+H+	218.118	N-desisopropylpropranolol	HMDB0060961	1	1	1	1	1	1	1	1	9.55813e-06	1.44761e-05	1.40392e-05	8.43711e-06	6.30985e-06	1.26431e-05	1.23192e-05	1.66688e-05	1.4878e-05	1.3237e-05	1.21373e-05	1.74605e-05	-0.405354	0.865706	N-desisopropylpropranolol	PM
C10H19NO4	M+H	C10H19NO4+H+	218.139	O-propanoyl-carnitine, O-propanoyl-D-carnitine, Propionylcarnitine	LMFA07070005, LMFA07070099, LMFA07070105	1	1	1	1	1	1	1	1	0.00019885	0.000216887	0.000176737	0.00015447	0.000177271	0.000179208	0.00022615	0.000230708	0.000169197	0.000171603	0.000166234	0.000150344	-0.0140692	0.0176879	Propionylcarnitine	FA
C8H14N2O5	M+H	C8H14N2O5+H+	219.098	Glutamylalanine, gamma-Glutamylalanine, Hydroxyprolyl-Serine, Serinyl-Hydroxyproline	HMDB0003764, HMDB0006248, HMDB0028872, HMDB0029040	1	1	1	1	1	1	1	1	3.99179e-05	4.66932e-05	5.72417e-05	5.24882e-05	2.25304e-05	2.99272e-05	5.14926e-05	5.27608e-05	6.93079e-05	5.11711e-05	2.38333e-05	2.50044e-05	-0.136932	0.0933768	gamma-Glutamylalanine	AA
C12H14N2O2	M+H	C12H14N2O2+H+	219.113	N-Acetylserotonin	HMDB0001238	1	1	1	1	1	1	1	1	2.89497e-06	8.53959e-06	3.3766e-06	4.57639e-06	6.1287e-06	1.13059e-05	9.66699e-06	1.71137e-05	7.19435e-06	1.20931e-05	1.18796e-05	1.5917e-05	-1.00431	1.27682	N-Acetylserotonin	PM
C9H18N2O4	M+H	C9H18N2O4+H+	219.134	Isoleucyl-Serine, Leucyl-Serine, Serylisoleucine, Serylleucine, Threoninyl-Valine, Valyl-Threonine	HMDB0028916, HMDB0028938, HMDB0029042, HMDB0029043, HMDB0029074, HMDB0029137	1	1	1	1	1	1	1	1	0.000295366	0.000204997	0.000105697	0.000162359	8.8862e-05	5.20443e-05	0.000159556	0.000101719	9.41329e-05	0.000107303	5.17044e-05	2.74862e-05	0.746767	0.52973	Leucyl-Serine	AA
C11H22O3	M+NH4	C11H22O3+NH4+	220.191	2-hydroxy hendecanoic acid, 3-Hydroxynonyl acetate, 10-hydroxy-undecanoic acid, 3-hydroxy-undecanoic acid, 4-hydroxy-undecanoic acid, 3S-hydroxy-undecanoic acid, omega-hydroxy hendecanoic acid	LMFA01050034, LMFA07010753, LMFA01050161, LMFA01050162, LMFA01050163, LMFA01050327, LMFA01050035	1	1	1	1	1	1	1	1	3.08803e-05	4.2942e-05	2.71931e-05	2.65546e-05	4.40966e-05	4.95608e-05	6.01111e-05	7.64345e-05	4.53733e-05	4.04113e-05	5.42112e-05	4.86043e-05	-0.555555	1.09412	3S-hydroxy-undecanoic acid	FA
C12H13NO2	M+NH4	C12H13NO2+NH4+	221.128	3-Indolebutyric acid, 5-(2-Furanyl)-1,2,3,4,5,6-hexahydro-7H-cyclopenta[b]pyridin-7-one	HMDB0002096, HMDB0039656	1	1	1	1	1	1	1	1	1.95388e-06	6.07342e-06	3.23803e-06	3.62598e-06	4.19777e-06	9.25446e-06	6.32509e-06	1.65017e-05	5.61609e-06	9.22997e-06	7.97051e-06	1.34348e-05	-1.05961	1.01376	3-Indolebutyric acid	PM
C8H15NO6	M+H	C8H15NO6+H+	222.097	N-Acetylgalactosamine, N-Acetyl-D-glucosamine, Beta-N-Acetylglucosamine, N-Acetyl-b-D-galactosamine, N-Acetylmannosamine	HMDB0000212, HMDB0000215, HMDB0000803, HMDB0000853, HMDB0001129	1	1	1	1	1	1	1	1	2.29114e-05	2.91219e-05	2.37319e-05	1.35151e-05	1.24611e-05	1.84485e-05	2.11009e-05	2.78288e-05	2.26792e-05	1.69228e-05	1.35189e-05	1.68646e-05	0.0153822	0.00973536	N-Acetylgalactosamine	PM
C14H20O	M+NH4	C14H20O+NH4+	222.185	2,4-Di-tert-butylphenol, (6R,7S)-6,7-Epoxy-1,3-tetradecadiyne, 2-benzylheptanal	HMDB0013816, HMDB0031776, HMDB0133154	1	1	1	1	1	1	1	1	4.9091e-06	9.454e-06	3.67964e-05	5.78904e-06	1.15678e-05	1.47814e-05	1.39999e-05	1.94074e-05	4.95493e-05	1.50815e-05	1.56302e-05	2.11563e-05	-0.694735	0.376454	2,4-Di-tert-butylphenol	PM
C14H22O	M+NH4	C14H22O+NH4+	224.201	4-(1,1,3,3-Tetramethylbutyl)-phenol, delta-Methylionone, 3-Methyl-4-(2,6,6-trimethyl-2-cyclohexen-1-yl)-3-buten-2-one, Methyl-delta-ionone, 1-(2,6,6-Trimethyl-2-cyclohexen-1-yl)-1-penten-3-one, alpha-Irone, Etaspirene, 10-Isopropyl-2,7-dimethyl-1-oxaspiro[4.5]deca-3,6-diene, 1-(2,6,6-Trimethyl-1-cyclohexen-1-yl)-1-penten-3-one, (Z)-alpha-Irone, 2-benzylheptan-1-ol	HMDB0013825, HMDB0031737, HMDB0031738, HMDB0032397, HMDB0035245, HMDB0035631, HMDB0036023, HMDB0036024, HMDB0038130, HMDB0061831, HMDB0133179	1	1	1	1	1	1	1	1	5.40551e-06	7.12061e-06	2.83208e-05	5.49654e-06	1.40212e-05	1.68906e-05	1.49153e-05	2.07906e-05	4.10667e-05	1.55377e-05	2.04896e-05	2.65908e-05	-0.851429	0.764894	2,4-Di-tert-butylphenol	PM
C11H12O5	M+H	C11H12O5+H+	225.076	Elenolide, Sinapic acid, 3-(3-hydroxy-4,5-dimethoxyphenyl)prop-2-enoic acid, 3-(4,5-dihydroxy-2,3-dimethoxyphenyl)prop-2-enal, 3-(6-hydroxy-7-methoxy-2H-1,3-benzodioxol-5-yl)propanal, 3-(7-hydroxy-6-methoxy-2H-1,3-benzodioxol-5-yl)propanal, 6-(3-hydroxyprop-1-en-1-yl)-4-methoxy-2H-1,3-benzodioxol-5-ol, 6-(3-hydroxyprop-1-en-1-yl)-5-methoxy-2H-1,3-benzodioxol-4-ol, 3-(4-hydroxy-3,5-dimethoxyphenyl…	HMDB0030018, HMDB0032616, HMDB0141325, HMDB0128665, HMDB0128667, HMDB0128668, HMDB0128673, HMDB0128674, HMDB0127488, HMDB0128183, HMDB0140920, HMDB0142075, HMDB0142169, HMDB0142170, HMDB0142171, HMDB0142172, HMDB0142173, HMDB0142174	1	1	1	1	1	1	1	1	1.47822e-05	1.51626e-05	1.33352e-05	1.6245e-05	4.00881e-06	3.86572e-06	5.39197e-06	4.88455e-06	4.29312e-06	5.91153e-06	2.36646e-06	2.06029e-06	1.43614	1.08741	Sinapic acid	PM
C10H11NO4	M+NH4	C10H11NO4+NH4+	227.103	Hydroxyphenylacetylglycine, 3-Carbamoyl-2-phenylpropionic acid, 2-[(4-methoxyphenyl)formamido]acetic acid, 2-{[hydroxy(2-methoxyphenyl)methylidene]amino}acetic acid, 2-{[hydroxy(3-methoxyphenyl)methylidene]amino}acetic acid	HMDB0000735, HMDB0060367, HMDB0131190, HMDB0126552, HMDB0127991	1	1	1	1	1	1	1	1	1.22654e-06	3.37758e-06	3.28592e-06	2.3844e-06	2.55055e-06	5.24927e-06	2.90779e-06	5.84498e-06	2.63922e-06	3.58744e-06	3.96354e-06	5.77005e-06	-0.451335	0.500396	Hydroxyphenylacetylglycine	AA
C10H12O6	M+H	C10H12O6+H+	229.071	3-(2,3,4-trihydroxy-5-methoxyphenyl)propanoic acid, 3-(2,4,5-trihydroxy-3-methoxyphenyl)propanoic acid, 2-(2,3,6-trihydroxy-4-methoxyphenyl)propanoic acid, 6-hydroxy-2,3,4-trimethoxybenzoic acid, 2-(2,3,5-trihydroxy-4-methoxyphenyl)propanoic acid, 2-hydroxy-3,4,5-trimethoxybenzoic acid	HMDB0125592, HMDB0125596, HMDB0125049, HMDB0142089, HMDB0125034, HMDB0141334	1	1	1	1	1	1	1	1	9.57018e-05	0.000105273	9.20951e-05	9.73954e-05	5.18769e-05	7.09913e-05	8.41705e-05	7.47879e-05	6.55281e-05	7.44615e-05	3.75738e-05	4.02542e-05	0.446189	0.804415	Carlosic acid	FA
C11H20N2O3	M+H	C11H20N2O3+H+	229.155	Isoleucylproline, Leucylproline	HMDB0011174, HMDB0011175	1	1	1	1	1	1	1	1	5.7165e-06	1.0429e-05	8.2765e-06	6.51367e-06	7.43176e-06	1.04737e-05	9.82044e-06	1.69667e-05	9.70082e-06	9.13423e-06	9.66887e-06	1.02882e-05	-0.425145	0.743105	Isoleucylproline	AA
C13H14N2O2	M+H	C13H14N2O2+H+	231.113	cyclic Melatonin	HMDB0060811	1	1	1	1	1	1	1	1	2.11211e-06	6.97423e-06	3.71209e-06	4.05025e-06	5.11625e-06	1.25835e-05	8.72944e-06	1.52433e-05	5.52006e-06	9.85709e-06	1.23267e-05	1.70637e-05	-0.992534	1.02405	cyclic Melatonin	AA
C11H22N2O3	M+H	C11H22N2O3+H+	231.17	Isoleucyl-Valine, Leucyl-Valine, Valyl-Isoleucine, Valyl-Leucine	HMDB0028920, HMDB0028942, HMDB0029130, HMDB0029131	1	1	1	1	1	1	1	1	3.30103e-05	2.40667e-05	7.47326e-06	9.11576e-06	1.58862e-05	1.15111e-05	4.15071e-05	3.42579e-05	1.33312e-05	9.57595e-06	7.37103e-06	5.00512e-06	-0.13593	0.04291	Isoleucyl-Valine	AA
C11H21NO4	M+H	C11H21NO4+H+	232.154	Butyrylcarnitine, O-butanoyl-carnitine, Isobutyryl-L-carnitine	LMFA07070054, LMFA07070003, LMFA07070075	1	1	1	1	1	1	1	1	4.01361e-05	4.85427e-05	6.26323e-05	3.75014e-05	5.05727e-05	5.88486e-05	4.8244e-05	6.84023e-05	6.28866e-05	4.30508e-05	5.23624e-05	5.10417e-05	-0.128374	0.225731	Butyrylcarnitine	FA
C9H16N2O5	M+H	C9H16N2O5+H+	233.113	N2-Succinyl-L-ornithine, 4-(Glutamylamino) butanoate, Aspartyl-Valine, Hydroxyprolyl-Threonine, Threoninyl-Hydroxyproline, Valyl-Aspartate, L-N-(3-Carboxypropyl)glutamine	HMDB0001199, HMDB0012161, HMDB0028766, HMDB0028873, HMDB0029062, HMDB0029123, HMDB0029393	1	1	1	1	1	1	1	1	7.92733e-06	8.21488e-06	8.65688e-06	7.28597e-06	3.56615e-06	3.53291e-06	7.26084e-06	8.61606e-06	8.63406e-06	6.83576e-06	2.96481e-06	2.58639e-06	0.0867302	0.0529061	Aspartyl-Valine	AA
C13H16N2O2	M+H	C13H16N2O2+H+	233.128	Melatonin	HMDB0001389	1	1	1	1	1	1	1	1	1.55321e-06	3.91312e-06	1.47772e-06	1.51122e-06	2.72843e-06	7.5013e-06	4.68875e-06	1.00169e-05	4.60161e-06	6.84332e-06	5.05457e-06	8.97723e-06	-1.10468	1.11409	Melatonin	PM
C10H20N2O4	M+H	C10H20N2O4+H+	233.15	Spermic acid 2, Isoleucyl-Threonine, Leucyl-Threonine, Threoninyl-Isoleucine, Threoninyl-Leucine	HMDB0013075, HMDB0028917, HMDB0028939, HMDB0029064, HMDB0029065	1	1	1	1	1	1	1	1	1.37967e-05	2.43634e-05	9.93229e-06	1.50153e-05	2.54107e-05	2.73884e-05	1.94263e-05	2.67262e-05	1.13969e-05	2.31271e-05	2.79189e-05	2.53909e-05	-0.209121	0.206559	Isoleucyl-Threonine	AA
C16H24O	M+H	C16H24O+H+	233.19	1-(2,6,6-Trimethyl-2-cyclohexen-1-yl)-1,6-heptadien-3-one	HMDB0029704	1	1	1	1	1	1	1	1	0.000102243	0.000102807	0.00012855	8.085e-05	4.92183e-05	4.51234e-05	6.80539e-05	5.10315e-05	0.000115388	6.13948e-05	5.55002e-05	5.20662e-05	0.334741	0.316072	1-(2,6,6-Trimethyl-2-cyclohexen-1-yl)-1,6-heptadien-3-one	PM
C11H20O4	M+NH4	C11H20O4+NH4+	234.17	Undecanedioic acid, Butyl butyryllactate	HMDB0000888, HMDB0037137	1	1	1	1	1	1	1	1	1.64451e-05	1.92478e-05	3.61115e-05	1.06609e-05	2.22453e-05	2.99361e-05	2.1275e-05	3.30405e-05	3.07943e-05	1.3855e-05	1.62705e-05	2.17233e-05	-0.0245613	0.010543	Undecanedioic acid	FA
C12H16N2O3	M+H	C12H16N2O3+H+	237.123	Alanyl-Phenylalanine, Phenylalanyl-Alanine, O-Desmethyl-lacosamide	HMDB0028694, HMDB0028988, HMDB0060855	1	1	1	1	1	1	1	1	1.69466e-05	2.84776e-05	2.24585e-05	2.48431e-05	2.56982e-05	3.33996e-05	4.24166e-05	5.21286e-05	3.52687e-05	4.72253e-05	3.44706e-05	4.04636e-05	-0.730874	1.60372	Alanyl-Phenylalanine	AA
C16H30O	M+H	C16H30O+H+	239.237	Hexadecenal	HMDB0060482	1	1	1	1	1	1	1	1	9.36781e-05	9.07639e-05	9.41423e-05	0.000104195	7.23568e-05	5.76111e-05	7.27331e-05	5.56132e-05	8.13991e-05	7.36208e-05	6.9431e-05	6.44636e-05	0.297297	0.777456	Hexadecenal	FA
C12H14O4	M+NH4	C12H14O4+NH4+	240.123	Isodillapiole, Monoisobutyl phthalic acid, Monobutylphthalate, 5'-(3'-Methoxy-4'-hydroxyphenyl)-gamma-valerolactone, Dihydrodeoxy-8-epiaustdiol, 5-[(3-hydroxy-4-methoxyphenyl)methyl]oxolan-2-one, ethyl (2E)-3-(2-hydroxy-4-methoxyphenyl)prop-2-enoate, ethyl 3-(4-methoxyphenyl)oxirane-2-carboxylate, 2-hydroxyethyl (2E)-3-(4-methoxyphenyl)prop-2-enoate, 4-(4-hydroxy-3,5-dimethoxyphenyl)but-3-en-2-on…	HMDB0029470, HMDB0002056, HMDB0013247, HMDB0029226, HMDB0031668, HMDB0127824, HMDB0131283, HMDB0131284, HMDB0131285, HMDB0135689, HMDB0135900, HMDB0135904, HMDB0135906	1	1	1	1	1	1	1	1	2.8558e-06	4.29292e-06	5.35379e-06	4.17275e-06	3.16491e-06	5.47743e-06	4.92914e-06	6.69621e-06	4.08689e-06	4.77079e-06	4.56864e-06	6.60415e-06	-0.32233	0.646452	Monobutylphthalate	PM
C5H12O7P2	M+H	C5H12O7P2+H+	247.013	Dimethylallyl pyrophosphate, Isopentenyl pyrophosphate	LMPR01010001, LMPR01010008	1	1	1	1	1	1	1	1	1.10178e-05	7.24036e-06	9.68175e-06	1.07035e-05	4.99707e-06	8.78053e-06	1.50098e-05	1.04071e-05	8.81215e-06	9.23803e-06	8.49372e-06	1.22199e-05	-0.291993	0.502884	Dimethylallyl pyrophosphate	PR
C10H17NO6	M+H	C10H17NO6+H+	248.113	Malonylcarnitine, O-malonylcarnitine	LMFA07070080, LMFA07070093	1	1	1	1	1	1	1	1	5.55958e-05	5.82363e-05	8.39218e-05	3.84693e-05	0.000309938	0.000154843	7.97465e-05	7.2322e-05	0.000100027	5.73808e-05	0.00026702	0.00014979	-0.0511162	0.010543	Malonylcarnitine	FA
C11H21NO5	M+H	C11H21NO5+H+	248.149	Hydroxybutyrylcarnitine, (R)-3-hydroxybutyrylcarnitine	HMDB0013127, HMDB0062735	1	1	1	1	1	1	1	1	5.83105e-05	7.6683e-05	0.000105239	6.42877e-05	7.25862e-05	9.54605e-05	7.64479e-05	0.000111195	9.48621e-05	8.09557e-05	7.61303e-05	8.50033e-05	-0.150683	0.263063	Hydroxybutyrylcarnitine	FA
C12H22O4	M+NH4	C12H22O4+NH4+	248.186	Dodecanedioic acid, Bis(1-methylethyl) hexanedioate, Dipropyl hexanedioate	HMDB0000623, HMDB0041613, HMDB0041614	1	1	1	1	1	1	1	1	3.3777e-05	2.86855e-05	3.42392e-05	2.8046e-05	3.36329e-05	3.21732e-05	4.55599e-05	4.18719e-05	4.02102e-05	3.40964e-05	2.72108e-05	2.24255e-05	-0.149605	0.245878	Dodecanedioic acid	FA
C13H18N2O3	M+H	C13H18N2O3+H+	251.139	Paucine, 3-Hydroxymelatonin, (2E)-N-(4-aminobutyl)-3-(3,4-dihydroxyphenyl)prop-2-enimidic acid, N-(4-aminobutyl)-3-(4-hydroxyphenyl)oxirane-2-carboximidic acid, N-(4-aminobutyl)-3-(3,4-dihydroxyphenyl)prop-2-enimidic acid, (2E)-N-(3-aminopropyl)-3-(4-hydroxy-3-methoxyphenyl)prop-2-enimidic acid	HMDB0029876, HMDB0060742, HMDB0139529, HMDB0139530, HMDB0139613, HMDB0139973	1	1	1	1	1	1	1	1	3.36593e-06	7.62224e-06	3.57024e-06	4.47358e-06	5.18533e-06	8.50425e-06	1.10898e-05	1.64156e-05	7.63869e-06	1.13961e-05	8.51803e-06	1.11596e-05	-1.01698	1.39691	3-Hydroxymelatonin	PM
C11H17NO6	M+H	C11H17NO6+H+	260.113	Fumarycarnitine, Osmaronin	HMDB0013134, HMDB0032769	1	1	1	1	1	1	1	1	5.60976e-06	9.83317e-06	9.40786e-06	9.09014e-06	4.83172e-06	6.63329e-06	4.85771e-06	6.67842e-06	5.64749e-06	5.97672e-06	3.27198e-06	5.1954e-06	0.521692	0.906045	Fumarycarnitine	FA
C12H20O6	M+H	C12H20O6+H+	261.133	Glycerol tripropanoate	HMDB0032857	1	1	1	1	1	1	1	1	5.99056e-05	4.83817e-05	3.63397e-05	4.05655e-05	3.01541e-05	2.64174e-05	3.33134e-05	2.33434e-05	1.93598e-05	2.44966e-05	1.34998e-05	8.24119e-06	0.983716	1.31163	Glycerol tripropanoate	PM
C14H20N2O3	M+H	C14H20N2O3+H+	265.155	Phenylalanyl-Valine, Valyl-Phenylalanine, (2E)-N-(4-aminobutyl)-3-(4-hydroxy-3-methoxyphenyl)prop-2-enimidic acid, N-(4-aminobutyl)-3-(4-hydroxy-3-methoxyphenyl)prop-2-enimidic acid	HMDB0029008, HMDB0029134, HMDB0139553, HMDB0139638	1	1	1	1	1	1	1	1	2.07191e-06	3.38496e-06	2.10287e-06	3.96709e-06	1.65144e-06	4.02117e-06	6.36457e-06	9.08072e-06	5.59161e-06	8.04367e-06	4.43312e-06	4.51379e-06	-1.14468	1.4106	Phenylalanyl-Valine	AA
C18H32O	M+H	C18H32O+H+	265.253	9Z,12Z-Octadecadienal, 11E,14E-Octadecadienal, 2E,13Z-Octadecadienal, 3Z,13Z-Octadecadienal, 6S,7R-Epoxy-3Z,9Z-octadecadiene, 3,4-Epoxy-6,9-octadecadiene, 5-(1-hydroxypropan-2-yl)isolongifolane, 9,12,15-Octadecatrien-1-ol, 9,12-octadecadienal, 3E,13Z-Octadecadienal, 11Z,13Z-Octadecadienal, 13Z,15Z-Octadecadienal, 9S,10R-Epoxy-6Z-octadecene	LMFA06000242, LMFA06000233, LMFA06000234, LMFA06000241, LMFA12000287, LMFA12000288, LMPR0103500010, LMFA05000216, LMFA06000101, LMFA06000235, LMFA06000239, LMFA06000240, LMFA12000284	1	1	1	1	1	1	1	1	0.000150214	0.00014574	0.000146261	0.000184152	0.000137665	0.000106771	0.000167628	0.000131203	0.000156681	0.000163134	0.000143224	0.00013239	-0.0383476	0.0658958	FA(18:2)	FA
C12H14O7	M+H	C12H14O7+H+	271.081	Phenylglucuronide, Phenol glucuronide, 3,4,5-trihydroxy-6-phenoxyoxane-2-carboxylic acid	HMDB0059806, HMDB0060014, HMDB0135168	1	1	1	1	1	1	1	1	6.05552e-05	5.66975e-05	5.91047e-05	6.23958e-05	2.89029e-05	2.87023e-05	4.56376e-05	3.83362e-05	4.69463e-05	4.2403e-05	2.09086e-05	1.6203e-05	0.49397	0.647735	Phenol glucuronide	PM
C18H33NO	M+H	C18H33NO+H+	280.263	Linoleamide	HMDB0062656	1	1	1	1	1	1	1	1	3.6196e-06	5.2213e-06	1.21522e-05	6.00878e-06	4.66383e-06	5.04129e-06	4.64482e-06	5.99026e-06	1.35477e-05	6.23314e-06	6.7517e-06	8.33699e-06	-0.309956	0.223252	Linoleamide	FA
C18H32O2	M+H	C18H32O2+H+	281.248	Linoleic acid, Bovinic acid, 9E,11E-Octadecadienoic acid, 10E,12Z-Octadecadienoic acid, Linoelaidic acid, Mangiferic acid, Linalyl caprylate, Ethyl 2E,4Z-hexadecadienoate, 5-Octadecynoic acid, Dihomolinoleic acid, 6Z,9Z-octadecadienoic acid, Octadecadienoate	HMDB0000673, HMDB0003797, HMDB0005047, HMDB0005048, HMDB0006270, HMDB0029800, HMDB0030430, HMDB0031051, HMDB0031097, HMDB0061864, HMDB0062238, HMDB0062784	1	1	1	1	1	1	1	1	0.000101713	9.74225e-05	7.74298e-05	9.16709e-05	3.78851e-05	3.56802e-05	3.65815e-05	3.12363e-05	4.14496e-05	3.57617e-05	3.38847e-05	3.16352e-05	1.06924	1.11409	Linoleic acid	FA
C18H35NO	M+H	C18H35NO+H+	282.279	Oleamide	HMDB0002117	1	1	1	1	1	1	1	1	4.00392e-05	4.46578e-05	4.4509e-05	5.33387e-05	4.57416e-05	3.23368e-05	5.73317e-05	5.18045e-05	6.26736e-05	6.15952e-05	5.448e-05	4.37125e-05	-0.347468	1.2428	Oleamide	FA
C18H34O2	M+H	C18H34O2+H+	283.263	trans-2-oleic acid, 3-octadecylenic acid, Petroselinic acid, Petroselaidic acid, 7E-octadecenoic acid, 17:1(12)(7Me), 18:1(14E), 18:1(14Z), 8E-Hexadecenyl acetate, 18-Octadecanolide, 6E-Hexadecenyl acetate, 11E-Hexadecenyl acetate, 5E-Hexadecenyl acetate, 9E-Hexadecenyl acetate, Oleic acid, cis-8-oleic acid, cis-10-oleic acid, 10E-octadecenoic acid, trans-vaccenic acid, cis-12-oleic acid, 16E-oct…	LMFA01030062, LMFA01030063, LMFA01030066, LMFA01030067, LMFA01030069, LMFA01020374, LMFA01030881, LMFA01030882, LMFA07010346, LMFA07040056, LMFA07010345, LMFA07010343, LMFA07010344, LMFA07010347, LMFA01030002, LMFA01030070, LMFA01030074, LMFA01030075, LMFA01030077, LMFA01030078, LMFA01030081, LMFA01030290, LMFA01030291, LMFA01030293, LMFA01030294, LMFA01030295, LMFA01030296, LMFA01030763, LMFA010…	1	1	1	1	1	1	1	1	0.000438504	0.000392854	0.000286289	0.000474531	0.000307069	0.000227947	0.000347691	0.000248487	0.000242554	0.000320518	0.000266967	0.000222886	0.36727	0.684259	Oleic acid	FA
C18H36O2	M+H	C18H36O2+H+	285.279	Stearic acid, Ethyl hexadecanoate, 16-Methylheptadecanoic acid, Hexyl dodecanoate	HMDB0000827, HMDB0029811, HMDB0031066, HMDB0061946	1	1	1	1	1	1	1	1	0.000110938	9.8425e-05	0.000108721	0.000122423	9.00635e-05	6.46913e-05	0.00010698	7.24528e-05	8.67144e-05	9.42365e-05	7.99001e-05	6.42454e-05	0.238585	0.526752	Stearic acid	FA
C20H30O	M+H	C20H30O+H+	287.237	Vitamin A, 11-cis-Retinol, 9-cis-Retinol, 13-cis Retinol, (x)-p-Menth-1-en-4-yl 5-isopropyl-2-methylphenyl ether, Abietinal, ent-16-Kauren-19-al, ent-19-Trachylobanal, 8,13-Abietadien-18-al	HMDB0000305, HMDB0006216, HMDB0006217, HMDB0006221, HMDB0030403, HMDB0034735, HMDB0036728, HMDB0036841, HMDB0038709	1	1	1	1	1	1	1	1	0.000235377	0.000208699	0.000159771	0.000284052	0.000201154	0.00013633	0.000222354	0.000150088	0.000147346	0.000197359	0.000173307	0.000125559	0.270315	0.459496	Vitamin A	PR
C15H22N2O3	M+NH4	C15H22N2O3+NH4+	296.197	Leucyl-phenylalanine, Isoleucyl-Phenylalanine, Phenylalanyl-Isoleucine, keratan sulfate I	HMDB0013243, HMDB0028914, HMDB0028998, HMDB0062483	1	1	1	1	1	1	1	1	3.53125e-07	2.51111e-06	1.2335e-06	1.1665e-06	2.58727e-06	4.36252e-06	3.18772e-06	7.11858e-06	2.20048e-06	4.57748e-06	4.67652e-06	7.30175e-06	-1.25062	1.12533	Phenylalanyl-Isoleucine	AA
C11H23O7P	M+H	C11H23O7P+H+	299.125	LysoPA(8:0/0:0)	HMDB0114740	1	1	1	1	1	1	1	1	9.96476e-06	1.06972e-05	1.57796e-05	6.72312e-06	1.01321e-05	8.96312e-06	1.1019e-05	8.67622e-06	1.57767e-05	9.56767e-06	1.03539e-05	5.18288e-06	0.0395488	0.0226957	LysoPA(8:0)	GP
C18H37NO2	M+H	C18H37NO2+H+	300.29	Sphingosine, 3-Dehydrosphinganine, Palmitoylethanolamide	HMDB0000252, HMDB0001480, HMDB0002100	1	1	1	1	1	1	1	1	8.41211e-06	7.82417e-06	8.45332e-06	1.00858e-05	8.55417e-06	5.6931e-06	1.14352e-05	9.57881e-06	8.29182e-06	8.18313e-06	7.38757e-06	7.22592e-06	-0.0878999	0.143949	Sphingosine	SP
C20H30O2	M+H	C20H30O2+H+	303.232	Methenolone, 17-Methyltestosterone, 4,8,12,15,18-eicosapentaenoic acid, 2E,5Z,8Z,11Z,14Z-eicosapentaenoic acid, 5Z,8Z,11E,14Z,17E-eicosapentaenoic acid, 5Z,11Z,14Z-Eicosatrien-8-ynoic acid, 8Z,1Z1,14Z-Eicosatrien-5-ynoic acid, EPA, Stenbolone, Abietic acid, Neoabietic acid, 8,13-Abietadien-18-oic acid, isopimaric acid, 9beta-pimara-7,15-dien-19-oic acid, ent-kaur-16-en-19-oic acid, 7,8-Epoxybasm-…	LMST02020028, LMST02020029, LMFA01030180, LMFA01030396, LMFA01031117, LMFA01030694, LMFA01030695, LMFA01030759, LMST02020044, LMPR0104050001, LMPR0104050004, LMPR0104050012, LMPR0104080010, LMPR0104080011, LMPR0104130004, LMPR0104200001, LMPR0104210001, LMPR0104400004, LMPR0104500001, LMFA01030397, LMFA01030693, LMFA01030760, LMFA01030761, LMFA01031033, LMFA01031116, LMFA01140004, LMPR0104100002,…	1	1	1	1	1	1	1	1	0.000105362	9.10746e-05	6.65643e-05	0.000104096	5.76995e-05	4.21649e-05	5.23815e-05	3.5247e-05	3.36004e-05	3.62292e-05	2.8519e-05	2.09085e-05	1.17447	1.36729	Eicosapentaenoic acid	FA
C20H32O2	M+H	C20H32O2+H+	305.248	(-)-Cladielline, (-)-Amijiol, (-)-Isoamijiol, Taxa-4(20),11(12)-dien-5alpha,13alpha-diol, Isotrinervidiol, Acutilol A, (-)-Reiswigin A, Methandriol, 18-methyl-5Z,8Z,11Z,14Z-nonadecatetraenoic acid, 5,11,14,17-Eicosatetraenoic acid, 4,7,10,13-Eicosatetraenoic acid, 4Z,7Z,10Z,13Z-eicosatetraenoic acid, 4Z,8Z,11Z,14Z-eicosatetraenoic acid, Juniperonic acid, 8,11-Eicosadiynoic acid, 5(E)-Arachidonic …	LMPR0104210003, LMPR0104250001, LMPR0104250002, LMPR0104390005, LMPR0104400003, LMPR0104470001, LMPR0104530002, LMST02020012, LMFA01020222, LMFA01030392, LMFA01030389, LMFA01030390, LMFA01030391, LMFA01030394, LMFA01030688, LMFA01030817, LMFA01030818, LMST02020027, LMST02020107, LMFA01030393, LMFA01030395, LMFA01030687, LMFA01030689, LMFA01030816, LMFA01030871, LMFA01030905, LMFA01030906, LMFA010…	1	1	1	1	1	1	1	1	0.00171006	0.0014298	0.000840812	0.00207622	0.00143059	0.000900458	0.00140282	0.000879802	0.000619651	0.00121684	0.00108239	0.000717088	0.503063	0.690065	Arachidonic acid	FA
C20H34O2	M+H	C20H34O2+H+	307.263	8,11,14-Eicosatrienoic acid, 5,8,11-Eicosatrienoic acid, Sciadonic acid, Sagittariol, 11,14,17-Eicosatrienoic acid	HMDB0002925, HMDB0010378, HMDB0031058, HMDB0036835, HMDB0060039	1	1	1	1	1	1	1	1	7.16721e-05	7.18544e-05	5.03424e-05	7.7712e-05	4.07753e-05	2.99109e-05	3.21301e-05	2.02715e-05	2.88515e-05	3.17788e-05	2.72251e-05	1.83972e-05	1.10924	1.30904	11,14,17-eicosatrienoic acid	FA
C20H34O	M+NH4	C20H34O+NH4+	308.295	Presphaerol, (-)-Dilophol, 8-[3]-ladderane-1-octanol, cis-9,10-Epoxy-1,3Z,6Z-eicosatriene, 5-(1-methoxybutan-2-yl)isolongifol-5-ene, Geranylgeraniol, aphidicolan-16beta-ol, Verrucosan-2b-ol, (+)-Verticillol, (+)-Tormesol, (Z,Z,Z)-geranylgeraniol, tuberculosinol	LMPR0104220002, LMPR0104450002, LMFA05000066, LMFA12000308, LMPR0103500014, LMPR0104010009, LMPR0104160002, LMPR0104280002, LMPR0104380001, LMPR0104530001, LMPR0104010018, LMPR0104030005	1	1	1	1	1	1	1	1	3.9363e-05	4.0215e-05	4.2708e-05	6.14054e-05	7.24877e-05	5.31684e-05	9.09662e-05	8.85259e-05	9.10086e-05	9.28568e-05	8.36674e-05	7.1402e-05	-0.744913	1.60372	FA(20:3)	FA
C20H36O	M+NH4	C20H36O+NH4+	310.31	9S,10R-Epoxy-3Z,6Z-eicosadiene, 6R,7S-Epoxy-3Z,9Z-eicosadiene, 6S,7R-Epoxy-3Z,9Z-eicosadiene, 3,4-Epoxy-6Z,9Z-eicosadiene, 3,7,11,15-Tetramethyl-6,10,14-hexadecatrien-1-ol, 9R,10S-Epoxy-3Z,6Z-eicosadiene	LMFA12000310, LMFA12000311, LMFA12000312, LMFA12000313, LMFA05000210, LMFA12000309	1	1	1	1	1	1	1	1	5.32555e-05	6.23353e-05	6.75807e-05	8.04755e-05	9.7775e-05	8.44492e-05	0.000126763	0.000121406	0.000120389	0.000129933	0.000129919	0.000112186	-0.732059	1.60372	FA(20:2)	FA
C22H30O	M+H	C22H30O+H+	311.237	14'-apo-beta-carotenal, (11Z)-8,18-ethanoretinal, Desogestrel	LMPR01070297, LMPR01090043, LMST02030104	1	1	1	1	1	1	1	1	6.32232e-05	5.60259e-05	4.05925e-05	7.83135e-05	6.28633e-05	4.15042e-05	8.08229e-05	5.08994e-05	4.95251e-05	7.17347e-05	6.44667e-05	4.31834e-05	-0.0743296	0.0660494	FA(22:7)	FA
C20H38O2	M+H	C20H38O2+H+	311.294	Eicosenoic acid, 11-Eicosenoic acid, Ethyl oleate, Paullinic acid, Oleyl acetate, 9Z-eicosenoic acid	HMDB0002231, HMDB0034296, HMDB0034451, HMDB0035159, HMDB0037127, HMDB0062436	1	1	1	1	1	1	1	1	2.10852e-05	1.63859e-05	1.28078e-05	2.18302e-05	1.69999e-05	1.10718e-05	2.38348e-05	1.40521e-05	1.50316e-05	1.94235e-05	1.92895e-05	1.33078e-05	-0.0669477	0.0658958	Ethyl oleate/Paulinic acid	FA
C19H37NO2	M+H	C19H37NO2+H+	312.29	(4E,8E,9Me-d19:2)sphingosine	LMSP01080012	1	1	1	1	1	1	1	1	6.62316e-06	9.45241e-06	8.21379e-06	9.34665e-06	7.72592e-06	5.95839e-06	8.82079e-06	9.95097e-06	1.16145e-05	8.02083e-06	7.53052e-06	5.73438e-06	-0.126923	0.185845	(4E,8E,9Me-d19:2)sphingosine	SP
C20H35NO2	M+H	C20H35NO2+H+	322.274	Anandamide (18:3,n-6), Anandamide (18:3,n-3)	LMFA08040003, LMFA08040007	1	1	1	1	1	1	1	1	0.000156976	0.000131966	0.000131043	0.000163262	0.000142217	0.000118514	0.000183296	0.000152488	0.000137952	0.000135074	0.00012922	0.000100097	0.0100377	0.010543	Anandamide (18:3,n-3)	FA
C21H36O	M+NH4	C21H36O+NH4+	322.31	pregnan-21-ol, 3-pentadecylphenol, 9S,10R-Epoxy-1,3Z,6Z-heneicosatriene	LMST02030174, LMPK15010004, LMFA12000319	1	1	1	1	1	1	1	1	5.77991e-05	5.69132e-05	6.5213e-05	9.56853e-05	0.00012465	8.71732e-05	0.000179628	0.000180341	0.000155532	0.000171304	0.000132764	0.000116923	-0.942058	1.60372	pregnan-21-ol	ST
C21H38O2	M+H	C21H38O2+H+	323.294	21:2(5Z,14Z), 21:2(5Z,16Z), 19-methyl-5E,9E-eicosadienoic acid, 12Z,15Z-heneicosadienoic acid, cis-6R,7S-cis-9R,10S-Diepoxy-3Z-heneicosene, (3S,4R)-(6S,7R)-Diepoxy-9Z-heneicosene, 6-Hydroxy-(E,E)-7,9-heneicosadien-11-one, (3R,4S)-(6S,7R)-Diepoxy-9Z-heneicosene, (3S,4R)-(6R,7S)-Diepoxy-9Z-heneicosene, 18-methyl-5Z,9Z-eicosadienoic acid, 19-methyl-5Z,9Z-eicosadienoic acid	LMFA01030862, LMFA01030868, LMFA01020224, LMFA01030399, LMFA12000314, LMFA12000318, LMFA12000219, LMFA12000316, LMFA12000317, LMFA01020225, LMFA01020226	1	1	1	1	1	1	1	1	5.55548e-06	6.95977e-06	9.0421e-06	1.28239e-05	1.65124e-05	1.31883e-05	1.92279e-05	1.50268e-05	1.79204e-05	2.3692e-05	2.29872e-05	2.37783e-05	-0.936354	1.50811	FA(21:2)	FA
C20H37NO2	M+H	C20H37NO2+H+	324.29	Linoleoyl ethanolamide	HMDB0012252	1	1	1	1	1	1	1	1	1.94359e-05	2.29245e-05	2.09925e-05	2.84071e-05	1.18e-05	1.15805e-05	1.10274e-05	1.02834e-05	1.59082e-05	1.10979e-05	1.00064e-05	8.44831e-06	0.786088	1.08741	Linoleoyl ethanolamide	FA
C20H39NO2	M+H	C20H39NO2+H+	326.305	N-Oleoylethanolamine	HMDB0002088	1	1	1	1	1	1	1	1	1.65988e-05	1.68063e-05	1.74445e-05	2.42997e-05	2.10414e-05	1.47944e-05	2.40714e-05	2.29086e-05	2.54069e-05	2.66458e-05	2.03681e-05	1.73895e-05	-0.301601	0.879388	N-Oleoylethanolamine	FA
C22H32O2	M+H	C22H32O2+H+	329.248	Docosahexaenoic acid, Neogrifolin, Grifolin, Retinol acetate	HMDB0002183, HMDB0030053, HMDB0030446, HMDB0035185	1	1	1	1	1	1	1	1	0.00094091	0.000813116	0.000429412	0.00110281	0.000860498	0.000540625	0.000962612	0.00060261	0.000399168	0.000865124	0.000761636	0.00052366	0.187951	0.18462	Docosahexaenoic acid	FA
C22H34O2	M+H	C22H34O2+H+	331.263	Docosapentaenoic acid (22n-6), Docosapentaenoic acid, Ethyl abietate, ent-16-Kauren-19-ol acetate, 4,8,12,15,19-Docosapentaenoic acid, Ethyl icosapentate	HMDB0001976, HMDB0006528, HMDB0032257, HMDB0035024, HMDB0039133, HMDB0039530	1	1	1	1	1	1	1	1	5.71259e-05	4.97615e-05	3.20997e-05	6.34761e-05	2.82905e-05	1.85057e-05	2.36705e-05	1.3533e-05	1.13211e-05	1.67424e-05	1.54804e-05	9.39645e-06	1.46735	1.25951	Docosapentaenoic acid	FA
C22H36O2	M+H	C22H36O2+H+	333.279	Adrenic acid, 1-Hydroxy-1-phenyl-3-hexadecanone, 3-Hydroxy-1-phenyl-1-hexadecanone, Ethyl Arachidonate	HMDB0002226, HMDB0035676, HMDB0035677, HMDB0062725	1	1	1	1	1	1	1	1	9.19384e-05	7.4556e-05	4.68466e-05	9.46467e-05	7.6832e-05	4.81911e-05	8.96485e-05	5.82689e-05	4.29245e-05	7.16866e-05	7.90836e-05	4.78422e-05	0.152949	0.163551	Adrenic acid	FA
C21H32O2	M+NH4	C21H32O2+NH4+	334.274	Pregnenolone, 20a-Dihydroprogesterone, 5a-Pregnane-3,20-dione, Ethyltestosterone, Bolasterone, (3beta,5alpha)-3-Hydroxypregn-16-en-20-one, Kaurenoic acid methyl ester, 5-alpha-Pregnan-3,20-dione	HMDB0000253, HMDB0003069, HMDB0003759, HMDB0006002, HMDB0006048, HMDB0034369, HMDB0036729, HMDB0059652	1	1	1	1	1	1	1	1	4.19246e-05	3.82267e-05	3.67849e-05	3.83823e-05	3.85817e-05	3.15135e-05	5.07155e-05	4.32223e-05	3.6552e-05	3.20987e-05	2.9767e-05	2.41722e-05	0.0580237	0.0658958	Pregnenolone	ST
C21H34O2	M+NH4	C21H34O2+NH4+	336.29	3alpha-hydroxy-5beta-pregnan-20-one, 3beta-hydroxy-5beta-pregnan-20-one, 3-(8Z-pentadecenyl)-catechol, 15-Phenylpentadecanoic acid, Bilobol, 3alpha-hydroxy-5alpha-pregnan-20-one, 3-hydroxy-5beta-pregnan-20-one, Allopregnanolone, 3-hydroxypregnan-20-one, 3beta-hydroxy-5alpha-pregnan-20-one, Pregn-5-ene-3beta,20alpha-diol, Pregn-5-ene-3beta,20beta-diol	LMST02030175, LMST02030185, LMPK15020002, LMFA01140030, LMPK15030001, LMST02030156, LMST02030157, LMST02030130, LMST02030155, LMST02030173, LMST02030205, LMST02030206	1	1	1	1	1	1	1	1	2.37406e-06	3.15738e-06	7.16984e-06	3.76851e-06	2.325e-06	3.58952e-06	4.07402e-06	4.49264e-06	8.37887e-06	3.38664e-06	2.08849e-06	2.45509e-06	-0.152253	0.0658958	Allopregnanolone	ST
C21H36O2	M+NH4	C21H36O2+NH4+	338.305	7a,17-dimethyl-5b-Androstane-3a,17b-diol, 3-(pentadecyl)-catechol, Pregnanediol, 1-Hydroxy-2,12,15-heneicosatrien-4-one, (E,E)-3,7,11-Trimethyl-2,6,10-dodecatrienyl hexanoate, 3a,20b-Pregnanediol, 21:3(5Z,14Z,17Z), 9(10),12(13),15(16)-trimethylene-octadecanoic acid, 7E,9E-Heneicosadien-6,11-one	LMST02020100, LMPK15020001, LMST02030202, LMFA05000600, LMFA07010545, LMST02030198, LMFA01030864, LMFA01140058, LMFA12000212	1	1	1	1	1	1	1	1	4.16356e-06	5.29309e-06	7.19152e-06	8.31647e-06	9.20483e-06	6.51316e-06	1.02313e-05	1.31385e-05	1.73405e-05	1.317e-05	9.80661e-06	9.09967e-06	-0.839258	1.38878	Pregnanediol	ST
C21H40O3	M+H	C21H40O3+H+	341.305	2-oxo-heneicosanoic acid, 3-oxo-heneicosanoic acid, 20-oxo-heneicosanoic acid, 5-oxo-heneicosanoic acid	LMFA01060135, LMFA01060137, LMFA01060136, LMFA01060138	1	1	1	1	1	1	1	1	3.25641e-05	4.30413e-05	4.15035e-05	4.87894e-05	5.39315e-05	5.3782e-05	6.59582e-05	6.67955e-05	5.62681e-05	6.94702e-05	7.25965e-05	6.78127e-05	-0.543901	1.60372	2-oxo-heneicosanoic acid	FA
C22H35NO2	M+H	C22H35NO2+H+	346.274	Anandamide (20:5,n-3)	LMFA08040008	1	1	1	1	1	1	1	1	0.000244286	0.000227484	0.000182603	0.000254586	0.000239428	0.000191511	0.000347136	0.000284363	0.000223068	0.000278982	0.000247357	0.00018995	-0.229427	0.540994	Anandamide (20:5,n-3)	FA
C22H37NO2	M+H	C22H37NO2+H+	348.29	Anandamide, O-Arachidonoyl Ethanolamine	HMDB0004080, HMDB0013655	1	1	1	1	1	1	1	1	1.27512e-05	1.2696e-05	1.34707e-05	1.30364e-05	1.02086e-05	8.13556e-06	1.22833e-05	1.14849e-05	1.00638e-05	9.03065e-06	6.59328e-06	6.70129e-06	0.324023	0.713687	Anandamide	FA
C22H39NO2	M+H	C22H39NO2+H+	350.305	Anandamide (20:3,n-3), Dihomo-gamma-linolenoyl-EA, Mead Acid-EA	LMFA08040005, LMFA08040011, LMFA08040037	1	1	1	1	1	1	1	1	1.9153e-05	1.86657e-05	1.67774e-05	1.99217e-05	1.87682e-05	1.70396e-05	3.18839e-05	2.6232e-05	2.72336e-05	2.02824e-05	2.22343e-05	1.54648e-05	-0.377582	0.833228	Anandamide (20:3,n-3)	FA
C22H41NO2	M+H	C22H41NO2+H+	352.321	Anandamide (20:2,n-6)	LMFA08040002	1	1	1	1	1	1	1	1	7.2882e-06	5.66854e-06	7.01664e-06	1.08044e-05	1.33091e-05	9.84438e-06	2.05579e-05	1.93898e-05	1.92367e-05	1.79557e-05	1.63896e-05	1.32152e-05	-0.984974	1.60372	Anandamide (20:2,n-6)	FA
C22H43NO2	M+H	C22H43NO2+H+	354.337	Anandamide (20:l,n-9)	LMFA08040010	1	1	1	1	1	1	1	1	6.55873e-06	4.41124e-06	4.6937e-06	8.91259e-06	1.24352e-05	6.43179e-06	1.48375e-05	1.37255e-05	1.46859e-05	1.55289e-05	1.28609e-05	9.02217e-06	-0.89274	1.46336	Anandamide (20:l,n-9)	FA
C21H41NO3	M+H	C21H41NO3+H+	356.316	N-palmitoyl valine, N-stearoyl alanine	LMFA08020120, LMFA08020125	1	1	1	1	1	1	1	1	1.13076e-06	3.32864e-06	4.78528e-06	4.70031e-06	4.34011e-06	5.588e-06	5.57254e-06	9.11614e-06	9.97337e-06	7.49012e-06	6.88293e-06	5.69898e-06	-0.905989	1.39691	N-palmitoyl valine	FA
C21H40O4	M+H	C21H40O4+H+	357.3	Japanic acid, MG(18:1(11E)/0:0/0:0)[rac], MG(18:1(9Z)/0:0/0:0)[rac], MG(0:0/18:1(9Z)/0:0), Stearoyllactic acid	LMFA01170036, LMGL01010004, LMGL01010005, LMGL01010024, LMFA07011021	1	1	1	1	1	1	1	1	5.49979e-05	4.88488e-05	3.82269e-05	7.06927e-05	5.65997e-05	3.86862e-05	0.000103622	7.57256e-05	6.2165e-05	9.1281e-05	6.2353e-05	5.4182e-05	-0.544597	1.0257	MG(18:1)	GL
C23H34O2	M+NH4	C23H34O2+NH4+	360.29	TrHA, 6Z,8E-tricosdien-4,19-diynoic acid	LMFA01030853, LMFA01031128	1	1	1	1	1	1	1	1	8.68699e-06	6.56683e-06	5.53885e-06	1.02417e-05	8.10927e-06	4.19241e-06	1.3493e-05	1.12674e-05	1.01048e-05	8.54232e-06	6.27675e-06	3.76986e-06	-0.302736	0.290286	TrHA	FA
C23H39NO	M+NH4	C23H39NO+NH4+	363.337	N-propyl arachidonoyl amine, N-isopropyl arachidonoyl amine, Macamide	LMFA08020009, LMFA08020010, LMFA08020155	1	1	1	1	1	1	1	1	1.93898e-05	1.71335e-05	9.75452e-06	2.53967e-05	3.90266e-05	1.711e-05	3.67003e-05	3.36124e-05	2.71701e-05	3.64457e-05	3.85636e-05	2.0768e-05	-0.596531	0.879807	Macamide	FA
C27H46O	M-H2O+H	C27H44-H2O+H+	369.352	Cholesterol	LMST01010001	1	1	1	1	1	1	1	1	0.00865381	0.00784049	0.00486745	0.0100001	0.00791625	0.00473231	0.00901266	0.0061988	0.00485269	0.00843668	0.00716766	0.00492372	0.116642	0.112477	Cholesterol	ST
C24H37NO2	M+H	C24H37NO2+H+	372.29	Anandamide (22:6,n-3)	LMFA08040009	1	1	1	1	1	1	1	1	2.27324e-06	2.87089e-06	1.56181e-06	1.74964e-06	2.88029e-06	3.40475e-06	7.32208e-06	6.53674e-06	3.29695e-06	4.78907e-06	4.90246e-06	4.34077e-06	-1.0812	1.4106	Anandamide (22:6,n-3)	FA
C24H41NO	M+NH4	C24H41NO+NH4+	377.353	N-butyl arachidonoyl amine, N-tert-butyl arachidonoyl amine, (-)N-(1R-methyl-propyl) arachidonoyl amine, (+)N-(1S-methyl-propyl) arachidonoyl amine, N,N-diethyl arachidonoyl amine, N-propyl alpha-methyl arachidonoyl amine, N-isopropyl alpha-methylarachidonoyl amine	LMFA08020011, LMFA08020012, LMFA08020016, LMFA08020017, LMFA08020024, LMFA08020033, LMFA08020035	1	1	1	1	1	1	1	1	1.10213e-05	1.03344e-05	9.31543e-06	1.64013e-05	3.65058e-05	1.88637e-05	4.23588e-05	4.24646e-05	2.48308e-05	3.714e-05	4.13125e-05	2.94325e-05	-1.08647	1.4106	N-butyl arachidonoyl amine	FA
C23H38O4	M+H	C23H38O4+H+	379.284	2-Arachidonylglycerol, MG(0:0/20:4(8Z,11Z,14Z,17Z)/0:0), MG(20:4(5Z,8Z,11Z,14Z)/0:0/0:0), MG(20:4(8Z,11Z,14Z,17Z)/0:0/0:0), 1-Acetoxy-2-hydroxy-5,12,15-heneicosatrien-4-one, Persenone A	HMDB0004666, HMDB0011549, HMDB0011578, HMDB0011579, HMDB0035273, HMDB0036568	1	1	1	1	1	1	1	1	4.91578e-05	4.24414e-05	9.66337e-06	3.92151e-05	3.48939e-05	2.0422e-05	8.41566e-05	5.53635e-05	2.69726e-05	6.33334e-05	3.76995e-05	2.14689e-05	-0.56171	0.463429	2-Arachidonylglycerol	GL
C23H44O4	M+H	C23H44O4+H+	385.331	MG(0:0/20:1(11Z)/0:0), MG(20:1(11Z)/0:0/0:0), Tetrahydropersin	HMDB0011543, HMDB0011573, HMDB0036344	1	1	1	1	1	1	1	1	2.18878e-06	2.23e-06	4.39487e-06	3.60303e-06	4.7563e-06	2.65335e-06	7.01687e-06	4.00654e-06	4.89266e-06	4.61098e-06	5.45009e-06	3.39808e-06	-0.567182	0.964085	MG(20:1)	GL
C27H44O	M+H	C27H44O+H+	385.346	7-Dehydrocholesterol, Vitamin D3, Cholestenone, 8-Dehydrocholesterol, Desmosterol, Zymosterol intermediate 2, Previtamin D3, Lumisterol 3, Tachysterol 3, 5,6-trans-Vitamin D3, 5a-Cholesta-7,24-dien-3b-ol, 5Alpha-cholesta-8-en-3-one, 5alpha-Cholest-7-en-3-one, 5-alpha-Cholesta-7,24-dien-3-beta-ol, 5alpha-cholest-8-en-3-one	HMDB0000032, HMDB0000876, HMDB0000921, HMDB0002027, HMDB0002719, HMDB0006271, HMDB0006500, HMDB0006505, HMDB0006560, HMDB0006719, HMDB0006842, HMDB0012178, HMDB0034399, HMDB0059615, HMDB0062414	1	1	1	1	1	1	1	1	3.17193e-05	3.01263e-05	6.22068e-05	2.50661e-05	1.78766e-05	1.2825e-05	1.83431e-05	1.19635e-05	4.83279e-05	1.85637e-05	1.75756e-05	1.43175e-05	0.478161	0.265832	7-Dehydrocholesterol	ST
C25H43NO	M+NH4	C25H43NO+NH4+	391.368	N-propyl alpha,alpha-dimethylarachidonoyl amine, N-isopropyl alpha,alpha-dimethylarachidonoyl amine, N-amyl arachidohoyl amine, N-(3-methyl-butyl) arachidonoyl amine, N-(1,1-dimethyl-propyl) arachidonoyl amine, Macamide	LMFA08020034, LMFA08020036, LMFA08020013, LMFA08020014, LMFA08020015, LMFA08020156	1	1	1	1	1	1	1	1	1.03806e-05	9.96188e-06	4.70254e-06	1.42871e-05	2.81836e-05	1.05613e-05	2.74531e-05	2.55455e-05	1.59145e-05	2.73284e-05	2.97547e-05	1.3964e-05	-0.842046	1.00513	Macamide (x2)	FA
C25H38O4	M+H	C25H38O4+H+	403.284	MG(0:0/22:6(4Z,7Z,10Z,13Z,16Z,19Z)/0:0), 1alpha-hydroxy-26,27-dinorvitamin D3 25-carboxylic acid / 1alpha-hydroxy-26,27-dinorcholecalciferol 25-carboxylic acid, (+)-Scalarin, 16-O-deacetyl-16-epi-scalarolbutenolide	LMGL01010027, LMST03020025, LMPR0105060001, LMPR0105060005	1	1	1	1	1	1	1	1	1.15802e-05	1.20041e-05	3.15823e-06	1.38591e-05	1.58781e-05	6.70161e-06	2.48809e-05	1.27995e-05	9.13225e-06	2.27482e-05	2.17112e-05	7.85317e-06	-0.649754	0.619177	MG(22:6)	GL
C23H31NO7	M+H	C23H31NO7+H+	434.217	Dextrorphan O-glucuronide	HMDB0010341	1	1	1	1	1	1	1	1	4.56255e-06	6.11327e-06	2.44525e-06	7.45424e-06	7.58361e-06	2.98882e-06	6.38526e-06	4.56164e-06	2.84268e-06	1.03728e-05	9.05687e-06	5.91435e-06	-0.329279	0.257163	Dextrorphan O-glucuronide	PM
C25H49NO4	M+NH4	C25H49NO4+NH4+	445.4	Stearoylcarnitine	HMDB0000848	1	1	1	1	1	1	1	1	1.59212e-05	1.71924e-05	1.8695e-05	2.55422e-05	2.04887e-05	1.75398e-05	3.31706e-05	3.79232e-05	3.64237e-05	3.54887e-05	2.57656e-05	2.62008e-05	-0.756889	1.60372	Stearoylcarnitine	FA
C27H44O4	M+NH4	C27H44O4+NH4+	450.358	24-Hydroxycalcitriol, 3beta,7alpha-Dihydroxy-5-cholestenoate, Neochlorogenin, Rockogenin, 23S,25,26-Trihydroxyvitamin D3, 4-cholesten-7α,12α,24-triol-3-one, 7alpha,12alpha,26-trihydroxycholest-4-en-3-one, 1alpha,23(S),25-trihydroxyvitamin D3, 3alpha,7beta-dihydroxy-5beta-cholest-24-en-26-oic Acid	HMDB0006228, HMDB0012454, HMDB0030702, HMDB0033769, HMDB0060134, HMDB0062399, HMDB0062400, HMDB0062686, HMDB0062712	1	1	1	1	1	1	1	1	5.47642e-06	5.35874e-06	6.47217e-06	9.09607e-06	7.76915e-06	5.12604e-06	1.49103e-05	1.34508e-05	1.39411e-05	1.2226e-05	7.19545e-06	9.0052e-06	-0.847823	1.38878	Calcitetrol	ST
C26H33NO6	M+H	C26H33NO6+H+	456.238	Erythroskyrin	HMDB0030464	1	1	1	1	1	1	1	1	1.20946e-05	1.85603e-05	2.46075e-05	1.99411e-05	2.537e-05	2.95116e-05	2.47367e-05	3.49304e-05	3.09135e-05	3.02206e-05	3.8722e-05	4.57054e-05	-0.657776	1.31515	Lacidipine	PM
C24H48NO6P	M+H	C24H48NO6P+H+	478.329	PE(P-19:1(12Z)/0:0)	LMGP02070003	1	1	1	1	1	1	1	1	3.72173e-06	4.95066e-06	1.96055e-06	6.38692e-06	9.29482e-06	5.07855e-06	8.50523e-06	1.22557e-05	5.41412e-06	1.29052e-05	9.20077e-06	4.30606e-06	-0.744256	0.804415	LPE(O-19:2)	GP
C29H48O4	M+NH4	C29H48O4+NH4+	478.389	13'-Carboxy-alpha-tocopherol, (3beta,5alpha,6beta,9alpha,22E,24R)-23-Methylergosta-7,22-diene-3,5,6,9-tetrol	HMDB0012555, HMDB0033634	0	0	1	1	1	1	1	1	2.68058e-06	4.22057e-06	5.42989e-06	5.09635e-06	2.50652e-06	1.48123e-06	7.35898e-06	1.18037e-05	1.6101e-05	1.05889e-05	3.05919e-06	4.06582e-06	-1.30675	0.929793	13'-Carboxy-alpha-tocopherol	PM
C3H8O2	M+H	C3H8O2+H+	77.0597	(S)-Propane-1,2-diol	HMDB0006213	1	1	1	1	0	1	1	1	0.000149807	0.00011177	9.10736e-05	8.34426e-05	9.35958e-05	8.13619e-05	9.67584e-05	7.95795e-05	7.66208e-05	6.58181e-05	7.01689e-05	5.66916e-05	0.455424	0.906045	(S)-Propane-1,2-diol	PM
C5H13NO	M+H	C5H13NO+H+	104.107	Neurine	HMDB0031259	1	1	1	1	0	1	1	1	6.01862e-05	9.48403e-05	5.29187e-05	8.56778e-05	7.76976e-05	9.41702e-05	8.4354e-05	0.000131503	6.11833e-05	0.000118491	8.68973e-05	0.000106143	-0.338465	0.604894	Neurine	PM
C7H13NO3S	M+H	C7H13NO3S+H+	192.069	N-Acetyl-L-methionine	HMDB0011745	1	1	1	1	0	1	1	1	1.18115e-06	3.77327e-06	1.4788e-06	2.69995e-06	4.58752e-06	8.01128e-06	3.95522e-06	8.56697e-06	2.12582e-06	5.45285e-06	7.44571e-06	8.99972e-06	-0.749907	0.619177	N-Acetyl-L-methionine	PM
C10H16N2O4	M+H	C10H16N2O4+H+	229.118	Prolylhydroxyproline, Hydroxyprolyl-Proline, Prolyl-Hydroxyproline	HMDB0006695, HMDB0028871, HMDB0029018	1	1	1	1	0	1	1	1	7.26943e-07	3.79336e-06	1.661e-06	1.54806e-06	2.20165e-06	4.72067e-06	3.05627e-06	9.26496e-06	3.78828e-06	4.41607e-06	5.33139e-06	6.73876e-06	-1.15362	1.09918	Prolylhydroxyproline	AA
C25H41NO4	M+H	C25H41NO4+H+	420.311	Stearidonyl carnitine	HMDB0006463	1	0	1	1	0	1	1	1	2.34999e-06	2.37434e-06	5.62652e-07	1.71109e-06	5.25414e-06	1.97642e-06	5.50863e-06	5.41216e-06	2.59422e-06	3.92538e-06	5.17578e-06	1.81321e-06	-0.779821	0.743105	Stearidonyl carnitine	FA
C11H19NO6	M+H	C11H19NO6+H+	262.129	Methylmalonylcarnitine, Epidermin, Succinylcarnitine, O-methylmalonyl-L-carnitine	HMDB0013133, HMDB0034777, HMDB0061717, HMDB0062785	1	1	0	1	1	0	1	1	6.68607e-06	8.7444e-06	1.5279e-05	4.69412e-06	6.41642e-05	3.64009e-05	1.11729e-05	1.16213e-05	1.98296e-05	7.94226e-06	6.08675e-05	3.80422e-05	-0.136636	0.0313694	Succinylcarnitine	PM
C11H8N2	M+H	C11H8N2+H+	169.076	Beta-Carboline	HMDB0012897	0	1	0	1	1	0	1	1	1.54631e-06	2.07047e-06	4.77277e-06	9.75001e-07	1.1265e-06	5.39007e-06	3.36223e-06	4.66058e-06	6.47186e-06	2.89912e-06	3.81037e-06	6.27291e-06	-0.790915	0.764894	Beta-Carboline	PM
C6H12N4	M+H	C6H12N4+H+	141.113	Metenamine	HMDB0029598	1	1	1	1	0	0	1	1	5.37435e-05	4.7564e-05	2.82521e-06	5.27241e-06	1.49912e-05	1.1171e-05	3.05498e-05	3.13062e-05	3.91576e-06	5.19966e-06	6.30476e-06	7.01558e-06	0.685545	0.21877	Metenamine	PM
C9H17NO3	M+H	C9H17NO3+H+	188.128	N-Heptanoylglycine	HMDB0013010	1	1	1	1	0	0	1	1	0.000345994	0.000292741	0.000148057	0.000118046	0.000165631	0.00017847	0.000259542	0.000267783	0.000144717	0.000109304	0.00013354	0.000124844	0.264497	0.194768	N-Heptanoylglycine	PM
C10H16O6	M+NH4	C10H16O6+NH4+	250.129	Glycerol 1-propanoate diacetate	HMDB0031640	1	1	0	1	0	0	1	1	3.38543e-06	5.16157e-06	1.52574e-05	3.06743e-06	3.38726e-05	2.2942e-05	7.51355e-06	6.98132e-06	1.70498e-05	8.90224e-06	3.6175e-05	2.46472e-05	-0.275129	0.0816892	Glycerol 1-propanoate diacetate	PM
C13H16N2O3	M+NH4	C13H16N2O3+NH4+	266.15	6-Hydroxymelatonin, 2-Oxomelatonin	HMDB0004081, HMDB0060721	1	1	0	1	0	0	1	1	6.21779e-07	2.0095e-06	8.51723e-07	2.15512e-06	2.41527e-06	5.50259e-06	2.60152e-06	6.58998e-06	2.28176e-06	2.67437e-06	4.33858e-06	6.64878e-06	-0.890766	0.690065	6-Hydroxymelatonin	PM
C9H14O6	M+NH4	C9H14O6+NH4+	236.113	Triacetin	HMDB0029592	1	1	0	0	0	0	1	1	0.000500901	0.000365439	0.00103025	0.000281697	0.00234589	0.00131737	0.000571316	0.000435988	0.000882959	0.000414795	0.00199779	0.00120032	0.0860889	0.0225208	Triacetin (check ion image)	GL
C16H32O2	M+H	C16H32O2+H+	257.248	Ethyl tetradecanoate, Palmitic acid, Trimethyltridecanoic acid, Isopalmitic acid, Butyl dodecanoate, Dodecyl butyrate, Hexyl decanoate, Octyl octanoate, Dodecyl 2-methylpropanoate	HMDB0034153, HMDB0000220, HMDB0002396, HMDB0031068, HMDB0032065, HMDB0032249, HMDB0032324, HMDB0033166, HMDB0036210	1	0	1	1	1	1	0	1	0.000228316	0.000200518	0.000236933	0.00023085	0.000121694	0.000105426	0.000135438	9.5988e-05	0.000147306	0.000127365	0.00010472	9.44048e-05	0.672154	1.0386	Palmitic acid	FA
C6H10O4	M+H	C6H10O4+H+	147.065	Methylglutaric acid, 2,2-Dimethylsuccinic acid, Adipic acid, 2-Methylglutaric acid, Monomethyl glutaric acid, (S)-2-Aceto-2-hydroxybutanoic acid, Dimethyl succinate, 4-Ethoxy-4-oxobutanoic acid	HMDB0000752, HMDB0002074, HMDB0000448, HMDB0000422, HMDB0000858, HMDB0006900, HMDB0033837, HMDB0061930	0	0	1	1	1	1	0	1	0.000104931	0.000113229	0.000182253	0.000104164	9.60892e-05	0.000107418	8.30221e-05	8.23505e-05	0.000148692	8.58114e-05	9.94642e-05	0.000101289	0.237445	0.32978	Methylglutaric acid	FA
C25H37NO2	M+H	C25H37NO2+H+	384.29	Macamide	LMFA08020160	1	0	1	1	0	0	0	1	4.90887e-06	3.24173e-06	1.5378e-06	5.56846e-06	4.6745e-06	2.05664e-06	1.13962e-05	5.73815e-06	2.36753e-06	6.55363e-06	2.60267e-06	7.53703e-07	-0.419681	0.185064	Macamide	FA
C12H24N2O3	M+H	C12H24N2O3+H+	245.186	Isoleucyl-Isoleucine, Isoleucyl-Leucine, Leucyl-Isoleucine, Leucyl-Leucine	HMDB0028910, HMDB0028911, HMDB0028932, HMDB0028933	0	0	1	1	0	0	0	1	6.86652e-06	5.18827e-06	2.18551e-06	3.48842e-06	4.41864e-06	3.31673e-06	1.48661e-05	1.08364e-05	6.96863e-06	4.87289e-06	2.31461e-06	1.77762e-06	-0.709377	0.383024	Isoleucyl-Isoleucine	AA
C10H18N2O5	M+H	C10H18N2O5+H+	247.129	L-beta-aspartyl-L-leucine, gamma-Glutamylvaline, Aspartyl-Isoleucine, Aspartyl-Leucine, Glutamylvaline, Isoleucyl-Aspartate, Leucyl-Aspartate	HMDB0011166, HMDB0011172, HMDB0028756, HMDB0028757, HMDB0028832, HMDB0028903, HMDB0028925	0	0	1	1	0	0	0	1	3.6772e-06	4.92078e-06	2.49563e-06	2.44148e-06	1.77832e-06	2.42567e-06	6.32675e-06	7.62672e-06	4.05949e-06	3.37582e-06	1.70429e-06	1.04861e-06	-0.444594	0.257163	Glutamylvaline	AA
C25H43NO4	M+H	C25H43NO4+H+	422.326	Gamma-linolenyl carnitine, Alpha-linolenyl carnitine	HMDB0006318, HMDB0006319	0	0	1	1	0	0	0	1	9.03784e-07	1.8685e-06	1.25536e-06	1.61114e-06	1.17179e-06	6.99651e-07	3.80606e-06	5.52274e-06	2.3178e-06	3.44512e-06	1.59086e-06	1.38922e-06	-1.26681	0.986526	Alpha-linolenyl carnitine	FA
C7H12O5	M+H	C7H12O5+H+	177.076	2-Isopropylmalic acid, 2,3-Dimethyl-3-hydroxyglutaric acid, 3-Isopropylmalate, (±)-Glycerol 1,2-diacetate	HMDB0000402, HMDB0002025, HMDB0012156, HMDB0031712	1	1	0	0	0	0	0	1	3.43364e-06	3.96893e-06	1.96868e-05	9.15356e-06	4.23482e-05	1.64961e-05	3.16006e-06	4.66819e-06	1.73884e-05	6.23046e-06	3.26155e-05	1.00094e-05	0.360322	0.0979061	2,3-Dimethyl-3-hydroxyglutaric acid	FA
C6H11O2	M[M]+	C6H11O2+	115.075	Caproate (6:0)	HMDB0061883	1	1	0	0	0	1	1	0	0.00456851	0.00408347	0.00449558	0.00347961	0.00396455	0.00433177	0.00346215	0.00326735	0.00377377	0.00273446	0.0030136	0.00292177	0.378421	1.50811	Caproate (6:0)	PM
C7H12O4	M+NH4	C7H12O4+NH4+	178.107	Pimelic acid, Dihydro-3-hydroxy-3-(1-hydroxyethyl)-4-methylfuran-2(3H)-one, 3-methyl-adipic acid, 3,3-dimethyl-glutaric acid	LMFA01170051, LMFA07040007, LMFA01170095, LMFA01170086	0	1	0	0	1	0	1	0	1.12331e-05	1.63577e-05	3.08881e-05	1.23264e-05	1.58537e-05	3.04513e-05	1.35933e-05	2.42315e-05	2.23702e-05	1.33872e-05	1.80624e-05	2.58286e-05	-0.00446555	0.00174817	Pimelic acid	FA
C7H12O	M+NH4	C7H12O+NH4+	130.123	2-Hepten-4-one, (Z)-4-Heptenal, 3-Hepten-2-one, 2-Methylcyclohexanone, 4-Methylcyclohexanone, 5-Methyl-3-hexen-2-one, 5-Methyl-5-hexen-2-one, trans-2-trans-4-Heptadien-1-ol, 2,5-Heptadien-1-ol	HMDB0031488, HMDB0031483, HMDB0031486, HMDB0031539, HMDB0031540, HMDB0031550, HMDB0031551, HMDB0032301, HMDB0040339	1	1	0	1	0	0	1	0	0.000135389	0.000183185	0.000186262	0.000158939	0.000173949	0.000238599	0.00016855	0.000246057	0.000208003	0.000203752	0.00022181	0.000317756	-0.34377	0.750488	2-Methylcyclohexanone	PM
C7H16N2O	M+H	C7H16N2O+H+	145.134	N-Acetylcadaverine, 1-(3-Aminopropyl)-4-aminobutanal	HMDB0002284, HMDB0012135	0	1	0	1	0	0	1	0	7.18528e-06	1.60968e-05	1.05488e-05	1.3325e-05	1.43508e-05	2.70083e-05	1.65689e-05	2.89732e-05	1.74213e-05	2.20379e-05	2.51837e-05	3.54817e-05	-0.718674	0.984338	N-Acetylcadaverine	PM
C8H11N3O3	M+H	C8H11N3O3+H+	198.087	N-Acetylhistidine	HMDB0032055	0	1	0	1	0	0	1	0	7.39635e-07	3.40284e-06	2.12305e-06	2.93836e-06	3.01977e-06	5.8562e-06	2.67361e-06	6.46257e-06	3.04808e-06	5.47634e-06	6.31331e-06	9.48511e-06	-0.888013	0.82937	N-Acetylhistidine	PM
C11H12N2O3	M+H	C11H12N2O3+H+	221.092	5-Hydroxy-L-tryptophan, p-Hydroxyl-ethotoin	HMDB0000472, HMDB0061174	0	1	0	1	0	0	1	0	4.28198e-07	2.28788e-06	1.67582e-06	1.08523e-06	1.05751e-06	2.70777e-06	3.04932e-06	4.07703e-06	3.27704e-06	3.24187e-06	2.29935e-06	3.00068e-06	-1.0355	1.41595	5-Hydroxy-L-tryptophan	PM
C8H6O3	M+H	C8H6O3+H+	151.039	Phenylglyoxylic acid, (E)-8-Hydroxy-2-octene-4,6-diynoic acid, 4-Hydroxyphthalide	HMDB0001587, HMDB0031515, HMDB0032598	0	1	1	1	1	1	0	0	2.43417e-05	2.74498e-05	3.23787e-05	2.3481e-05	1.74116e-05	2.0961e-05	1.66533e-05	1.82971e-05	2.03505e-05	1.66591e-05	1.60458e-05	1.8027e-05	0.461695	1.11409	Phenylglyoxylic acid	PM
C7H6O3	M+H	C7H6O3+H+	139.039	4-Hydroxybenzoic acid, Gentisate aldehyde, 2-Methoxy-1,4-benzoquinone, keratan sulfate II (core 2-linked),degradation product 1	HMDB0000500, HMDB0004062, HMDB0032576, HMDB0062484	0	0	1	1	1	1	0	0	0.000271627	0.000211617	0.000220579	0.000226348	0.000157405	0.000175999	0.000240163	0.000150962	0.000146633	0.000166875	0.000150701	0.000143351	0.339409	0.796521	4-Hydroxybenzoic acid	PM
C5H5N5O	M+H	C5H5N5O+H+	152.057	Guanine, 2-Hydroxyadenine, 8-Hydroxyadenine	HMDB0000132, HMDB0000403, HMDB0000542	0	0	1	1	1	1	0	0	3.85085e-05	3.6224e-05	1.34196e-05	3.1361e-05	2.61511e-05	1.98737e-05	1.69822e-05	1.53422e-05	6.40138e-06	1.65413e-05	1.62583e-05	6.4549e-06	1.08598	1.27682	2-Hydroxyadenine	PM
C9H8O3	M+H	C9H8O3+H+	165.055	m-Coumaric acid, 4-Hydroxycinnamic acid, Phenylpyruvic acid, 2-Hydroxycinnamic acid, Enol-phenylpyruvate, cis-p-Coumaric acid, 4-methoxy-1-benzofuran-6-ol, 3-(3-hydroxyphenyl)prop-2-enoic acid, 3-phenyloxirane-2-carboxylic acid, 3-(4-hydroxyphenyl)prop-2-enoic acid, 3-(2-hydroxyphenyl)prop-2-enoic acid, 3-(2,3-dihydroxyphenyl)prop-2-enal, 3-(2,5-dihydroxyphenyl)prop-2-enal, 3-(2-hydroxyphenyl)oxi…	HMDB0001713, HMDB0002035, HMDB0000205, HMDB0002641, HMDB0012225, HMDB0030677, HMDB0129375, HMDB0125104, HMDB0126545, HMDB0128076, HMDB0134028, HMDB0134029, HMDB0134030, HMDB0134031, HMDB0141767, HMDB0141768	0	0	1	1	1	1	0	0	2.93259e-05	3.58681e-05	4.00656e-05	2.65147e-05	1.39212e-05	2.33778e-05	2.08952e-05	1.93363e-05	2.40019e-05	1.93402e-05	1.50831e-05	1.85018e-05	0.529186	0.806735	Phenylpyruvic acid	PM
C10H10O3	M+H	C10H10O3+H+	179.07	9-oxo-2,4,5,7-decatetraenoic acid, 8S-hydroxy-2-Decene-4,6-diynoic acid, 10-hydroxy-8E-Decene-4,6-diynoic acid, 8S-hydroxy-2E-Decene-4,6-diynoic acid, 10-hydroxy-8Z-Decene-4,6-diynoic acid, Antibiotic LA-1	LMFA01060086, LMFA01030711, LMFA01030712, LMFA01030710, LMFA01030713, LMFA01031130	0	0	1	1	1	1	0	0	6.11374e-05	5.96426e-05	6.97053e-05	5.71543e-05	3.44246e-05	4.06756e-05	3.94123e-05	3.08e-05	3.97062e-05	3.42176e-05	2.98713e-05	3.54127e-05	0.623972	1.22639	9-oxo-2,4,5,7-decatetraenoic acid//4-Methoxycinnamic acid	FA
C14H28O2	M+H	C14H28O2+H+	229.216	Myristic acid, 2,6,10-Trimethylundecanoic acid, Decyl butanoate, 12-Methyltridecanoic acid, Hexanal octane-1,3-diol acetal, Undecanal propyleneglycol acetal, Ethyl dodecanoate, Heptyl heptanoate, Hexyl octanoate, 3-Methylbutyl nonanoate, Nonyl isovalerate, Dodecyl acetate, Isobutyl decanoate, 10-Methyltridecanoic acid	HMDB0000806, HMDB0002221, HMDB0037312, HMDB0031072, HMDB0032318, HMDB0032548, HMDB0033788, HMDB0034461, HMDB0036216, HMDB0037495, HMDB0038034, HMDB0038969, HMDB0059865, HMDB0061781	0	0	1	1	1	1	0	0	4.89998e-05	3.93312e-05	3.37704e-05	3.71584e-05	2.10458e-05	2.23225e-05	4.53952e-05	1.50929e-05	2.01933e-05	1.76075e-05	1.63969e-05	1.77444e-05	0.613604	0.713687	Myristic acid	FA
C16H30O2	M+H	C16H30O2+H+	255.232	8E-Tetradecenyl acetate, 2-hexyl-2-decenoic acid, Gaidic acid, 7Z-palmitoleic acid, 8Z-Hexadecenoic acid, 6E-Hexadecenoic acid, 9E-Tetradecenyl acetate, 12E-Tetradecenyl acetate, 3E-Tetradecenyl acetate, 6E-Tetradecenyl acetate, 8Z-Tetradecenyl acetate, 9Z-Tetradecenyl acetate, dodecyl 2E-butenoate, delta-hexadecalactone, Vittatalactone, 15R-Hexadecanolide, 16-Hexadecanolide, 10-hexadecenoic acid…	LMFA07010291, LMFA01020141, LMFA01030054, LMFA01030055, LMFA01031081, LMFA01031082, LMFA07010293, LMFA07010286, LMFA07010287, LMFA07010289, LMFA07010315, LMFA07010316, LMFA07010515, LMFA07040055, LMFA07040032, LMFA07040052, LMFA07040054, LMFA01030260, LMFA01030261, LMFA01030262, LMFA07010537, LMFA07010307, LMFA07010312, LMFA07010313, LMFA07010314, LMFA07010491, LMFA01030263, LMFA01030264, LMFA010…	0	0	1	1	1	1	0	0	0.000214056	0.000202828	0.000214253	0.000219097	0.000148323	0.000146003	0.000124567	0.000106942	0.000151117	0.00013319	0.000141061	0.000137106	0.527613	1.38878	cis-9-palmitoleic acid	FA
C18H30O2	M+H	C18H30O2+H+	279.232	Linolenelaidic acid, Calendic acid, Punicic acid	HMDB0030964, HMDB0030962, HMDB0030963	0	0	1	1	1	1	0	0	2.85457e-05	3.01531e-05	3.61129e-05	2.73741e-05	1.23376e-05	1.17036e-05	1.57414e-05	1.25115e-05	2.72365e-05	1.19117e-05	9.95275e-06	9.02356e-06	0.759484	0.804415	gamma-Linolenic acid	FA
C18H35NO2	M+H	C18H35NO2+H+	298.274	Palmitoleoyl Ethanolamide	HMDB0013648	0	0	1	1	1	1	0	0	5.60759e-06	4.99597e-06	6.58924e-06	4.20332e-06	1.3805e-06	1.4814e-06	2.70271e-06	1.96438e-06	4.1544e-06	1.44613e-06	1.65583e-06	1.46016e-06	0.857994	0.690065	Palmitoleoyl Ethanolamide	FA
C20H33NO2	M+H	C20H33NO2+H+	320.258	N-hydroxy arachidonoyl amine, Anandamide (18:4,n-3)	LMFA08020029, LMFA08040006	0	0	1	1	1	1	0	0	5.1485e-06	4.15673e-06	5.20494e-06	5.2705e-06	1.42347e-06	1.72695e-06	9.33978e-07	1.36586e-06	2.74829e-06	6.73461e-07	7.86629e-07	6.21056e-07	1.68548	1.25951	N-hydroxy arachidonoyl amine	FA
C21H42O3	M+H	C21H42O3+H+	343.321	21-hydroxy-heneicosanoic acid, 1-Oleylglycerol, 14-hydroxy-heneicosanoic acid, 15-hydroxy-heneicosanoic acid, 2-hydroxy-heneicosanoic acid, Propylene glycol stearate	LMFA01050076, LMGL01020031, LMFA01050207, LMFA01050208, LMFA01050209, LMFA07011008	0	0	1	1	1	1	0	0	6.13931e-06	4.95315e-06	1.27514e-06	4.25975e-06	5.44125e-07	2.24995e-07	8.92756e-08	1.82081e-07	0	1.03415e-07	2.17843e-07	0	4.87556	0.970752	1-Oleylglycerol	GL
C18H34O	M+H	C18H34O+H+	267.268	9-Octadecenal	HMDB0030965	1	0	1	0	1	1	0	0	3.4151e-05	3.59566e-05	3.23699e-05	4.09385e-05	3.17711e-05	2.1998e-05	3.82176e-05	2.39508e-05	3.14924e-05	3.25002e-05	3.40839e-05	2.25662e-05	0.109197	0.17601	9-Octadecenal	FA
C3H8O3	M+H	C3H8O3+H+	93.0546	Glycerol	HMDB0000131	0	0	1	1	0	1	0	0	1.45744e-05	9.77206e-06	6.36874e-06	7.25503e-06	4.42689e-06	5.75279e-06	1.11007e-05	3.45938e-06	1.18886e-06	2.91155e-06	2.73934e-06	2.35429e-06	1.01935	0.776895	Glycerol	PM
C9H14N2O6	M+H	C9H14N2O6+H+	247.092	L-alpha-Aspartyl-L-hydroxyproline, 5,6-Dihydrouridine	HMDB0011160, HMDB0000497	0	0	1	1	0	1	0	0	8.06522e-06	6.37135e-06	3.09445e-06	5.61233e-06	9.38323e-07	6.61287e-07	2.44534e-06	2.09889e-06	1.17718e-06	1.32371e-06	0	1.99333e-07	1.77207	0.83913	L-alpha-Aspartyl-L-hydroxyproline	AA
C6H5N5O	M+H	C6H5N5O+H+	164.057	Pterin	HMDB0000802	0	0	1	1	1	0	0	0	9.07566e-06	7.04405e-06	6.22721e-06	5.72153e-06	1.5008e-06	1.95819e-06	3.6016e-06	3.56049e-06	2.8376e-06	3.80765e-06	1.97873e-06	9.81489e-07	0.910936	0.701115	Pterin	PM
C9H10O4	M+H	C9H10O4+H+	183.065	Hydroxyphenyllactic acid, 2',6'-Dihydroxy-4'-methoxyacetophenone, Homovanillic acid, Isohomovanillic acid, 3-(3-Hydroxyphenyl)-3-hydroxypropanoic acid, 3-Methoxy-4-hydroxyphenylglycolaldehyde, 2,6-Dimethoxybenzoic acid, 3-(3,5-dihydroxyphenyl)propanoic acid, 3,5-dimethoxybenzoic acid, 4-ethenyl-6-methoxybenzene-1,2,3-triol, 5-ethenyl-3-methoxybenzene-1,2,4-triol, 2-hydroxy-2-(4-methoxyphenyl)acet…	HMDB0000755, HMDB0029646, HMDB0000118, HMDB0000333, HMDB0002643, HMDB0004061, HMDB0029273, HMDB0125533, HMDB0127495, HMDB0125591, HMDB0125595, HMDB0140294, HMDB0124923, HMDB0126386, HMDB0129348, HMDB0134042, HMDB0134043, HMDB0131428, HMDB0133494, HMDB0133788, HMDB0140892	0	0	0	1	1	0	0	0	2.97944e-05	3.03027e-05	5.34518e-05	2.64099e-05	1.92623e-05	2.74921e-05	2.09029e-05	2.08293e-05	4.00742e-05	2.2675e-05	2.13886e-05	2.25589e-05	0.331053	0.349253	Hydroxyphenyllactic acid	PM
C21H41NO4	M+H	C21H41NO4+H+	372.311	Tetradecanoylcarnitine	HMDB0005066	0	0	1	0	1	0	0	0	1.58679e-06	1.18133e-06	1.56045e-05	1.37431e-06	2.14696e-06	2.6869e-06	8.05246e-06	4.37163e-06	2.62845e-05	3.60991e-06	3.44147e-06	3.01656e-06	-0.988659	0.257163	Tetradecanoylcarnitine	FA
C19H35NO2	M+H	C19H35NO2+H+	310.274	(9Me,4E,8E,10E-d19:3)sphingosine	LMSP01080014	1	1	0	0	1	0	0	0	2.47831e-06	2.15258e-06	6.63316e-06	2.70621e-06	1.57634e-06	1.9678e-06	1.56693e-06	2.55303e-06	9.94981e-06	1.76186e-06	2.05934e-06	3.45024e-06	-0.2851	0.0816892	(9Me,4E,8E,10E-d19:3)sphingosine	SP
C21H36O2	M+H	C21H36O2+H+	321.279	3a,20b-Pregnanediol, Pregnanediol, 7a,17-dimethyl-5b-Androstane-3a,17b-diol, Adipostatin A, 1-Hydroxy-2,12,15-heneicosatrien-4-one, 5alpha-Pregnane-3alpha,20alpha-diol	HMDB0002156, HMDB0004025, HMDB0006013, HMDB0031009, HMDB0036741, HMDB0060409	1	1	0	0	1	0	0	0	1.9881e-06	2.39974e-06	5.36601e-06	4.15054e-06	3.96535e-06	4.614e-06	6.0289e-06	5.37747e-06	7.40777e-06	7.12334e-06	7.52144e-06	8.01095e-06	-0.883182	1.60372	Pregnanediol	ST
C2H5NO2	M+H	C2H5NO2+H+	76.0393	Glycine, Ethyl nitrite	HMDB0000123, HMDB0031239	0	0	0	0	1	0	0	0	5.56593e-05	3.51325e-05	0.000510018	6.95521e-05	3.341e-05	3.49576e-05	3.41818e-05	3.09851e-05	0.000708713	3.08616e-05	3.14701e-05	6.77102e-05	-0.291152	0.037294	Glycine	AA
C3H7NO3	M+H	C3H7NO3+H+	106.05	L-Serine, D-Serine	HMDB0000187, HMDB0003406	0	0	0	0	1	0	0	0	2.86228e-05	3.40331e-05	5.72799e-05	3.79613e-05	3.09141e-05	2.69203e-05	3.26964e-05	2.75112e-05	6.36544e-05	3.61954e-05	2.80546e-05	2.73925e-05	0.00151924	0.00174817	L-Serine	AA
C4H10N2O2	M+H	C4H10N2O2+H+	119.082	L-2,4-diaminobutyric acid	HMDB0006284	0	0	0	0	1	0	0	0	9.15406e-07	2.91901e-07	1.26827e-05	7.08189e-07	1.91128e-07	7.55271e-07	6.39958e-07	5.25699e-07	2.19936e-05	3.12194e-07	5.54163e-07	1.45957e-06	-0.713247	0.0772656	L-2,4-diaminobutyric acid	PM
C8H10O	M+H	C8H10O+H+	123.08	1-Phenylethanol, 2,3-Dimethylphenol, 2,6-Dimethylphenol, 3,4-Dimethylphenol, 4-Ethylphenol, 2,5-Dimethylphenol, 1-Methoxy-2-methylbenzene, 1-Methoxy-4-methylbenzene	HMDB0032619, HMDB0032148, HMDB0032150, HMDB0032151, HMDB0029306, HMDB0030540, HMDB0032074, HMDB0032076	0	0	0	0	1	0	0	0	0.000548414	0.000547239	0.00194867	0.000569363	0.000569184	0.00073935	0.000396492	0.000415117	0.0015878	0.00043249	0.000510266	0.000633225	0.308213	0.120167	1-Methoxy-4-methylbenzene	PM
C8H10O2	M+H	C8H10O2+H+	139.075	1-(2-Furyl)butan-3-one, 1,4-Dimethoxybenzene, 1,3-Dimethoxybenzene, Tyrosol, 3-Acetyl-2,5-dimethylfuran, 4-Ethoxyphenol, 2-Methoxy-4-methylphenol, 2,6-Dimethyl-1,4-benzenediol, 1,2-Dimethoxybenzene, 2-Acetyl-3,5-dimethylfuran, 5-ethylbenzene-1,3-diol, 4-ethylbenzene-1,3-diol	HMDB0032290, HMDB0029671, HMDB0029672, HMDB0004284, HMDB0029563, HMDB0032036, HMDB0032136, HMDB0032137, HMDB0032139, HMDB0032159, HMDB0125590, HMDB0126388	0	0	0	0	1	0	0	0	0.000412081	0.00042344	0.000649278	0.000403414	0.00034263	0.000418517	0.000277258	0.00027584	0.000502212	0.000292924	0.000340426	0.000390194	0.349855	0.647735	Tyrosol	PM
C10H8O	M+H	C10H8O+H+	145.065	Naphthalene epoxide, 1-Naphthol, 2-Naphthol, (Z)-2-Decene-4,6,8-triyn-1-ol	HMDB0006215, HMDB0012138, HMDB0012322, HMDB0031001	0	0	0	0	1	0	0	0	3.31219e-05	4.07221e-05	0.000181933	4.76305e-05	3.36648e-05	4.18966e-05	2.88202e-05	3.17516e-05	0.000138665	3.73575e-05	4.4711e-05	5.23267e-05	0.183822	0.0529061	1-Naphthol	PM
C10H10O	M+H	C10H10O+H+	147.08	3-(4-Methylphenyl)-2-propenal, 2-Methyl-3-phenyl-2-propenal, 4-Phenyl-2-butenal, Benzylideneacetone, 4-(1-Methylethenyl)benzaldehyde, 2-benzylprop-2-enal, (3E)-4-phenylbuta-1,3-dien-2-ol, 4-phenylbut-3-en-2-one	HMDB0029640, HMDB0031566, HMDB0029602, HMDB0031617, HMDB0035925, HMDB0133602, HMDB0133726, HMDB0141081	0	0	0	0	1	0	0	0	0.000110722	0.000125976	0.000474796	0.000128798	0.000105191	0.000129467	9.70278e-05	0.000105687	0.00039028	0.000108773	0.000118903	0.000149797	0.147518	0.0450102	4-Phenyl-2-butenal	PM
C8H10O4	M+H	C8H10O4+H+	171.065	3,4-Dihydroxyphenylglycol, 3,4-Methyleneadipic acid, 3,5-dimethoxybenzene-1,2-diol, 2,6-dimethoxybenzene-1,4-diol, 3,4-dimethoxybenzene-1,2-diol, 2,3-dimethoxybenzene-1,4-diol, 4,5-dimethoxybenzene-1,3-diol	HMDB0000318, HMDB0059756, HMDB0132906, HMDB0132907, HMDB0133971, HMDB0133972, HMDB0133982	0	0	0	0	1	0	0	0	7.60338e-05	8.55489e-05	0.000131334	8.47414e-05	8.26485e-05	9.77815e-05	8.87612e-05	9.03336e-05	0.000138646	9.26888e-05	9.33274e-05	0.000100156	-0.113847	0.17601	3,4-Dihydroxyphenylglycol	PM
C6H8N2O3	M+NH4	C6H8N2O3+NH4+	174.087	5-Hydroxymethyl-4-methyluracil, 4-Imidazolone-5-propionic acid, Imidazolelactic acid	HMDB0000544, HMDB0001014, HMDB0002320	0	0	0	0	1	0	0	0	0	0	1.09303e-06	1.23391e-07	0	1.7751e-07	8.60813e-08	0	1.24622e-06	8.32032e-08	0	1.99339e-07	-0.212237	0.0225208	Imidazolelactic acid	PM
C12H16O	M+H	C12H16O+H+	177.127	4-Methyl-1-phenyl-2-pentanone, (S)-4-(4-Methylphenyl)-2-pentanone, 3-(4-Isopropylphenyl)propanal	HMDB0031569, HMDB0034177, HMDB0036171	0	0	0	0	1	0	0	0	0.000127927	0.000129084	0.000372328	0.000127637	9.87342e-05	0.000110117	0.000105407	9.93793e-05	0.00031469	0.000104457	0.000110567	0.000123937	0.170052	0.0658958	3-(4-Isopropylphenyl)propanal	PM
C12H18O	M+H	C12H18O+H+	179.143	4-Methyl-1-phenyl-2-pentanol, Propofol, Tricycloekasantal, 3-Methyl-1-phenyl-3-pentanol, 2,5-Diisopropylphenol, 11-Methyl-7-oxatetracyclo[6.3.1.01,6.04,11]dodecane, 7-Isopropyl-5-methylbicyclo[2.2.2]oct-5-en-2-one, 2-Ethoxy-1-methyl-4-(1-methylethyl)benzene, Geijerone	HMDB0031568, HMDB0014956, HMDB0031194, HMDB0031731, HMDB0032579, HMDB0035055, HMDB0036681, HMDB0037272, HMDB0038194	0	0	0	0	1	0	0	0	0.000131706	0.000137506	0.00024362	0.000127369	8.96376e-05	9.71575e-05	9.51722e-05	8.41565e-05	0.000199508	9.77597e-05	9.97241e-05	0.000105251	0.279015	0.236465	3-Methyl-1-phenyl-3-pentanol	PM
C12H12O2	M+H	C12H12O2+H+	189.091	5,8,11-dodecatriynoic acid	LMFA01030465	0	0	0	0	1	0	0	0	2.52186e-05	2.7366e-05	5.86999e-05	2.32309e-05	1.74764e-05	2.34001e-05	1.83495e-05	1.53609e-05	4.67905e-05	1.74149e-05	1.85751e-05	2.47503e-05	0.312422	0.191905	5,8,11-dodecatriynoic acid	FA
C12H14O2	M+H	C12H14O2+H+	191.107	1-(4-Methoxyphenyl)-1-penten-3-one, 3-(2-Methylpropylidene)-3alpha,4-dihydro-1(3H)-isobenzofuranone, Benzyl trans-2-methyl-2-butenoate, Prenyl benzoate, 5-(4-methoxyphenyl)pent-1-en-3-one, 1-(4-hydroxyphenyl)-4-methylpent-1-en-3-one	HMDB0030905, HMDB0032027, HMDB0032177, HMDB0032488, HMDB0132983, HMDB0132934	0	0	0	0	1	0	0	0	9.00597e-05	9.23092e-05	0.000139994	8.8427e-05	6.54662e-05	7.01401e-05	7.00571e-05	6.59653e-05	0.000116098	6.8108e-05	7.0612e-05	7.33453e-05	0.235246	0.304273	Butylphthalide	PM
C10H18O4	M+H	C10H18O4+H+	203.128	Sebacic acid, R-2-Hydroxy-3-methylbutanoic acid 3-Methylbutanoyl, 2-Ethylsuberic acid, Heptylmalonic acid, 3-Methylazelaic acid	HMDB0000792, HMDB0031510, HMDB0059708, HMDB0059719, HMDB0059754	0	0	0	0	1	0	0	0	0.000106518	9.33237e-05	0.00069452	0.000127985	8.46794e-05	9.54138e-05	8.8422e-05	8.59456e-05	0.000817837	9.71973e-05	8.33714e-05	7.87432e-05	-0.0577131	0.00914928	Sebacic acid	FA
C8H14O5	M+NH4	C8H14O5+NH4+	208.118	3-Hydroxysuberic acid, 6-(2-Hydroxyethoxy)-6-oxohexanoic acid	HMDB0000325, HMDB0061681	0	0	0	0	1	0	0	0	6.76857e-06	1.0356e-05	4.56245e-05	6.69566e-06	1.76928e-05	3.21601e-05	4.02223e-06	2.31059e-05	1.93098e-05	2.73086e-06	3.41052e-06	8.06385e-06	0.976148	0.446229	3-Hydroxysuberic acid	FA
C10H18O5	M+H	C10H18O5+H+	219.123	3-Hydroxysebacic acid, 2-Hydroxydecanedioic acid	HMDB0000350, HMDB0000424	0	0	0	0	1	0	0	0	8.16603e-05	8.13409e-05	0.000237958	6.66569e-05	9.11366e-05	0.000126648	4.53491e-05	0.000101745	0.000128043	3.87466e-05	3.52314e-05	4.87426e-05	0.784696	0.576452	2-Hydroxydecanedioic acid	PM
C15H23NO	M+H	C15H23NO+H+	234.185	N,N-Didesmethyltramadol	HMDB0060849	0	0	0	0	1	0	0	0	5.21635e-06	8.98445e-06	3.51499e-05	6.06795e-06	7.06706e-06	9.89654e-06	8.81726e-06	1.40147e-05	4.45196e-05	1.1965e-05	1.10703e-05	1.60847e-05	-0.55676	0.213753	N,N-Didesmethyltramadol	PM
C16H20O2	M+H	C16H20O2+H+	245.154	6E,8E,12E,14E-Hexadecatetraen-10-ynoic acid, 6E,8E,12E-Hexadecatrien-10-ynoic acid	LMFA01030703, LMFA01030706	0	0	0	0	1	0	0	0	2.18292e-05	2.09393e-05	4.58906e-05	2.23411e-05	1.34599e-05	1.14681e-05	2.22031e-05	1.30034e-05	4.1189e-05	1.71399e-05	1.57512e-05	1.43279e-05	0.136997	0.064006	6E,8E,12E,14E-Hexadecatetraen-10-ynoic acid	FA
C17H28O	M+H	C17H28O+H+	249.221	Avocadenofuran, (all-Z)-8,11,14-Heptadecatrienal, Sterol	HMDB0030932, HMDB0041333, HMDB0060512	0	0	0	0	1	0	0	0	8.58125e-06	6.43388e-06	3.24511e-05	8.29507e-06	5.64871e-06	8.23889e-06	4.37714e-06	2.69697e-06	2.3715e-05	4.93502e-06	4.90764e-06	6.74836e-06	0.55582	0.183799	Sterol	ST
C17H24O2	M+H	C17H24O2+H+	261.185	Falcarindiol, Panaxydol, 1,8-Heptadecadiene-4,6-diyne-3,10-diol, 2-Polyprenyl-6-methoxyphenol	HMDB0033941, HMDB0034000, HMDB0038781, HMDB0060355	0	0	0	0	1	0	0	0	7.50936e-06	1.1796e-05	3.44627e-05	1.15413e-05	1.03134e-05	1.05463e-05	1.19665e-05	9.52771e-06	2.72237e-05	1.30572e-05	1.10898e-05	1.26382e-05	0.011194	0.00294276	Falcarindiol	FA
C19H28O	M+H	C19H28O+H+	273.221	5a-Androst-3-en-17-one, 5alpha-androst-16-en-3-one	LMST02020094, LMST02020079	0	0	0	0	1	0	0	0	1.1864e-05	1.43258e-05	5.52247e-05	1.69107e-05	1.4104e-05	1.40406e-05	1.62647e-05	1.27156e-05	5.47195e-05	1.54575e-05	1.67042e-05	1.83385e-05	-0.0855929	0.0225208	5alpha-androst-16-en-3-one	ST
C18H27NO	M+H	C18H27NO+H+	274.217	N-Isobutyl-2,4,8,10,12-tetradecapentaenamide	HMDB0031184	0	0	0	0	1	0	0	0	4.31205e-07	8.13948e-07	1.88686e-05	5.57214e-07	1.04912e-06	3.08026e-06	1.56557e-06	3.98219e-06	2.6713e-05	2.21955e-06	3.19408e-06	4.0446e-06	-0.750345	0.134764	N-Isobutyl-2,4,8,10,12-tetradecapentaenamide	FA
C19H30O	M+H	C19H30O+H+	275.237	Androstenol	HMDB0005935	0	0	0	0	1	0	0	0	1.15892e-05	1.05121e-05	2.64209e-05	1.34784e-05	7.14497e-06	6.72294e-06	9.24362e-06	7.76301e-06	2.34181e-05	1.09751e-05	9.018e-06	9.26612e-06	0.122676	0.0557267	Androstenol	ST
C13H25NO5	M+H	C13H25NO5+H+	276.181	Hydroxyhexanoycarnitine	HMDB0013131	0	0	0	0	1	0	0	0	1.01685e-05	1.28817e-05	3.05767e-05	1.06877e-05	1.46645e-05	2.1681e-05	1.26348e-05	2.78861e-05	2.89902e-05	1.2801e-05	1.19547e-05	1.408e-05	-0.106165	0.0557267	Hydroxyhexanoycarnitine	FA
C19H32O	M+H	C19H32O+H+	277.253	5a-Androstan-3b-ol	HMDB0005830	0	0	0	0	1	0	0	0	4.66877e-06	3.84896e-06	1.83253e-05	4.18976e-06	3.23575e-06	2.08532e-06	4.93936e-06	3.62501e-06	1.34021e-05	6.68508e-06	3.30668e-06	3.98408e-06	0.0164286	0.00294276	5a-Androstan-3b-ol	ST
C20H26O	M+H	C20H26O+H+	283.206	Vitamin A2 aldehyde, Juvocimene 1	HMDB0035695, HMDB0040643	0	0	0	0	1	0	0	0	1.29595e-06	1.75818e-06	2.02084e-05	3.58103e-06	1.55763e-06	2.13729e-06	2.11081e-06	1.97803e-06	1.8448e-05	1.86014e-06	2.24102e-06	2.20754e-06	0.0822839	0.010543	Vitamin A2 aldehyde	PR
C20H28O	M+H	C20H28O+H+	285.221	Retinal, 11-cis-Retinaldehyde, 9-cis-Retinal, 13-cis-Retinal, Vitamin A2, delta6-Dehydroferruginol	HMDB0001358, HMDB0002152, HMDB0006218, HMDB0006220, HMDB0013117, HMDB0035151	0	0	0	0	1	0	0	0	1.76845e-05	1.50933e-05	4.69058e-05	1.84003e-05	1.3984e-05	1.19428e-05	1.23415e-05	1.15794e-05	4.74146e-05	1.17362e-05	1.25091e-05	1.29943e-05	0.19177	0.0658958	Retinal	PR
C19H26O2	M+H	C19H26O2+H+	287.201	Androstenedione, Citronellyl cinnamate	HMDB0000053, HMDB0038957	0	0	0	0	1	0	0	0	8.16868e-06	7.04313e-06	1.7055e-05	8.85743e-06	5.33694e-06	4.90562e-06	7.16264e-06	3.85366e-06	1.43673e-05	6.46247e-06	5.04694e-06	4.72498e-06	0.30363	0.17601	Androstenedione	ST
C19H28O2	M+H	C19H28O2+H+	289.216	Dehydroepiandrosterone, Testosterone, Epitestosterone, Androstanedione, Etiocholanedione, Dehydroandrosterone, 4-Dihydroboldenone	HMDB0000077, HMDB0000234, HMDB0000628, HMDB0000899, HMDB0003769, HMDB0005962, HMDB0006035	0	0	0	0	1	0	0	0	3.7923e-06	3.77064e-06	1.6892e-05	3.49383e-06	2.06564e-06	1.97704e-06	1.54714e-06	1.53688e-06	1.29624e-05	2.36737e-06	2.46675e-06	2.52919e-06	0.45058	0.103303	Testosterone	ST
C14H25NO6	M+H	C14H25NO6+H+	304.175	Pimelylcarnitine	HMDB0013328	0	0	0	0	1	0	0	0	3.66911e-06	3.6113e-06	4.99082e-05	4.64502e-06	8.67959e-06	6.96753e-06	3.93742e-06	4.8666e-06	4.97772e-05	6.51216e-06	7.81561e-06	5.29117e-06	-0.0133324	0.00174817	Pimelylcarnitine	FA
C18H34O4	M+H	C18H34O4+H+	315.253	9,10-DHOME, Octadecanedioic acid, 12,13-DHOME, (9xi,10xi,12xi)-9,10-Dihydroxy-12-octadecenoic acid, Dibutyl decanedioate	HMDB0004704, HMDB0000782, HMDB0004705, HMDB0031679, HMDB0041220	0	0	0	0	1	0	0	0	2.18373e-05	1.74594e-05	0.00200693	9.33649e-05	9.58508e-06	1.94816e-05	3.35343e-05	5.26474e-05	0.00269621	9.51233e-05	1.11817e-05	7.67983e-06	-0.417445	0.04291	Octadecanedioic acid	FA
C22H34O	M+H	C22H34O+H+	315.268	13-HDoHE	HMDB0060043	0	0	0	0	1	0	0	0	2.22554e-06	2.34767e-06	9.5285e-06	3.53222e-06	2.40428e-06	2.31834e-06	3.56836e-06	1.9142e-06	9.79358e-06	3.60174e-06	3.86521e-06	3.33216e-06	-0.221983	0.0705322	13-HDoHE	FA
C19H36O4	M+H	C19H36O4+H+	329.269	MG(0:0/16:1(9Z)/0:0), MG(16:1(9Z)/0:0/0:0), Avocadene 1-acetate, Avocadene 2-acetate, Avocadene 4-acetate	HMDB0011534, HMDB0011565, HMDB0031043, HMDB0031044, HMDB0031045	0	0	0	0	1	0	0	0	3.69899e-06	4.18511e-06	1.50213e-05	5.06055e-06	2.15533e-06	1.20183e-06	3.74622e-06	2.64724e-06	1.19877e-05	3.30651e-06	1.67454e-06	1.38049e-06	0.340228	0.0816892	MG(16:1)	GL
C19H37NO4	M+H	C19H37NO4+H+	344.28	Dodecanoylcarnitine	HMDB0002250	0	0	0	0	1	0	0	0	1.24179e-06	1.57183e-06	1.02143e-05	2.02775e-06	9.88558e-07	1.83906e-06	1.47645e-06	1.96017e-06	1.90514e-05	2.68352e-06	2.57174e-06	3.02715e-06	-0.782934	0.17601	Dodecanoylcarnitine	FA
C21H38O4	M+H	C21H38O4+H+	355.284	MG(18:2(9Z,12Z)/0:0/0:0)[rac], PGF2alpha methyl ether, Ceriporic acid B	LMGL01010006, LMFA03010073, LMFA01170125	0	0	0	0	1	0	0	0	1.32401e-06	2.59899e-06	5.32229e-05	1.664e-06	1.51746e-06	1.32192e-06	3.07847e-06	2.05363e-06	3.1999e-05	2.95696e-06	1.74639e-06	1.18032e-06	0.519253	0.064006	MG(18:2)	GL
C20H39NO4	M+H	C20H39NO4+H+	358.295	N-palmitoyl threonine	LMFA08020107	0	0	0	0	1	0	0	0	1.7522e-06	1.90033e-06	0.000137757	3.45608e-06	5.6381e-07	3.21413e-06	7.39159e-06	6.74817e-06	0.000278185	9.45226e-06	1.82263e-06	1.99642e-06	-1.03977	0.112477	N-palmitoyl threonine	FA
C22H40O4	M+H	C22H40O4+H+	369.3	Octadecyl fumarate	LMFA07010979	0	0	0	0	1	0	0	0	4.89707e-07	4.93279e-07	3.3211e-05	2.29572e-07	3.13255e-07	3.63379e-07	2.45177e-07	8.86394e-08	1.9755e-05	4.01051e-07	1.18089e-07	3.59928e-07	0.743296	0.067761	Octadecyl fumarate	FA
C21H39NO4	M+H	C21H39NO4+H+	370.295	cis-5-Tetradecenoylcarnitine, trans-2-Tetradecenoylcarnitine, O-(2-tetradecenoyl)carnitine	HMDB0002014, HMDB0013329, HMDB0062588	0	0	0	0	1	0	0	0	4.89541e-07	8.49413e-07	1.4864e-05	6.63496e-07	9.45405e-07	4.48656e-07	1.01222e-06	1.50003e-06	2.98501e-05	1.07168e-06	5.64166e-07	1.23738e-06	-0.948305	0.116551	O-(2-tetradecenoyl)carnitine	FA
C22H41NO4	M+H	C22H41NO4+H+	384.311	N-oleoyl threonine	LMFA08020108	0	0	0	0	1	0	0	0	1.39382e-07	6.64418e-07	4.39581e-06	9.84396e-08	3.3875e-07	2.82316e-07	1.07409e-06	1.43683e-06	9.63819e-06	7.04368e-07	7.51539e-07	1.29207e-06	-1.33158	0.258546	N-oleoyl threonine	FA
C22H43NO4	M+H	C22H43NO4+H+	386.326	Pentadecanoylcarnitine	HMDB0062517	0	0	0	0	1	0	0	0	6.05818e-07	1.34479e-06	1.72784e-05	7.94105e-07	1.25292e-06	1.99738e-06	2.66314e-06	2.5421e-06	3.62023e-05	3.33123e-06	1.09749e-06	1.32839e-06	-1.01903	0.15895	Pentadecanoylcarnitine	FA
C23H43NO4	M+H	C23H43NO4+H+	398.326	trans-Hexadec-2-enoyl carnitine, 9-Hexadecenoylcarnitine	HMDB0006317, HMDB0013207	0	0	0	0	1	0	0	0	8.02196e-08	4.4267e-07	6.4242e-06	4.17509e-07	2.46622e-07	4.42029e-07	1.26255e-06	1.01137e-06	9.88705e-06	1.20112e-06	1.48517e-06	9.28293e-07	-0.970045	0.186856	9-Hexadecenoylcarnitine	FA
C23H45NO4	M+H	C23H45NO4+H+	400.342	L-Palmitoylcarnitine	HMDB0000222	0	0	0	0	1	0	0	0	2.9258e-07	9.72464e-07	1.80777e-05	1.61261e-06	1.22385e-06	1.52044e-06	2.25052e-06	4.58613e-06	3.99366e-05	2.78917e-06	2.09414e-06	1.95169e-06	-1.17759	0.186467	L-Palmitoylcarnitine	FA
C27H44O2	M+H	C27H44O2+H+	401.341	7-Ketocholesterol, 7a-Hydroxy-cholestene-3-one, Calcidiol, 5,6-trans-25-Hydroxyvitamin D3, 25-Hydroxytachysterol3, (3beta,5alpha,6a)-Cholesta-8,14-diene-3,6-diol, 5-Methyl-2,4-bis(3-methyl-2-butenyl)-6-(2-methyl-1-oxopropyl)-5-(4-methyl-3-pentenyl)cyclohexanone, 3beta-Hydroxy-5-cholestenal, 27alpha-Hydroxy-8-dehydrocholesterol	HMDB0000501, HMDB0001993, HMDB0003550, HMDB0006721, HMDB0006722, HMDB0034328, HMDB0036012, HMDB0060131, HMDB0060132	0	0	0	0	1	0	0	0	1.85952e-06	2.72289e-06	8.77233e-06	8.80009e-07	1.0821e-07	2.02781e-07	2.96361e-07	5.42254e-07	4.89702e-06	2.01478e-07	0	3.20981e-07	1.2168	0.249517	7-Ketocholesterol	ST
C26H50O4	M+H	C26H50O4+H+	427.378	Hexacosanedioic acid	LMFA01170040	0	0	0	0	1	0	0	0	6.05182e-05	3.06302e-05	0.0062815	0.000223812	1.59564e-05	2.06608e-05	1.94297e-05	1.2806e-05	0.00368518	7.10015e-05	1.12495e-05	1.22075e-05	0.799177	0.0726434	Hexacosanedioic acid	FA
C27H53NO4	M+H	C27H53NO4+H+	456.405	Arachidyl carnitine	LMFA07070052	0	0	0	0	1	0	0	0	1.25966e-06	2.95331e-07	9.95458e-05	2.64699e-06	2.3987e-07	6.03909e-07	5.23752e-06	6.21034e-07	8.16926e-05	2.38017e-06	6.04819e-07	1.08171e-06	0.191066	0.016281	Arachidyl carnitine	FA
C27H52O4	M+NH4	C27H52O4+NH4+	458.42	MG(0:0/24:1(15Z)/0:0), MG(24:1(15Z)/0:0/0:0)	HMDB0011559, HMDB0011589	0	0	0	0	1	0	0	0	2.74661e-07	2.98665e-07	4.80653e-05	6.23326e-07	0	2.54949e-07	1.13272e-07	8.14879e-08	4.765e-05	8.94596e-07	1.20628e-07	3.01245e-07	0.0103991	0.00174817	MG(24:1)	GL
C29H57NO4	M+H	C29H57NO4+H+	484.436	Docosanoylcarnitine	HMDB0062468	0	0	0	0	1	0	0	0	0	0	7.1482e-05	0	1.11807e-07	9.69063e-08	5.16319e-07	0	6.64152e-05	0	1.13464e-07	0	0.0966562	0.00914928	Docosanoylcarnitine	FA
C28H54O5	M+NH4	C28H54O5+NH4+	488.431	DG(10:0/0:0/15:0), DG(10:0/15:0/0:0), DG(10:0/i-15:0/0:0), DG(10:0/0:0/i-15:0), DG(10:0/a-15:0/0:0), DG(10:0/0:0/a-15:0), DG(15:0/10:0/0:0), DG(15:0/0:0/10:0), DG(12:0/13:0/0:0), DG(12:0/0:0/13:0), DG(i-12:0/13:0/0:0), DG(i-12:0/0:0/13:0), DG(i-12:0/a-13:0/0:0), DG(i-12:0/0:0/a-13:0), DG(i-12:0/i-13:0/0:0), DG(i-12:0/0:0/i-13:0), DG(12:0/i-13:0/0:0), DG(12:0/0:0/i-13:0), DG(12:0/a-13:0/0:0), DG(1…	HMDB0092978, HMDB0092977, HMDB0092979, HMDB0092980, HMDB0092981, HMDB0092982, HMDB0093433, HMDB0093434, HMDB0093035, HMDB0093036, HMDB0093037, HMDB0093038, HMDB0093039, HMDB0093040, HMDB0093041, HMDB0093042, HMDB0093043, HMDB0093044, HMDB0093045, HMDB0093046, HMDB0093435, HMDB0093436, HMDB0093437, HMDB0092927, HMDB0092928, HMDB0092929, HMDB0093438, HMDB0093706, HMDB0093707, HMDB0093708, HMDB00937…	0	0	0	0	1	0	0	0	0	0	1.37705e-05	0	0	0	0	9.15249e-08	9.70947e-06	0	0	0	0.490585	0.0452411	DG(25:0)	GL
C23H41NO4	M+H	C23H41NO4+H+	396.311	(7Z,10Z)-hexadecadienoylcarnitine	LMFA07070021	0	0	1	1	0	0	0	0	3.16502e-06	3.16906e-06	1.40665e-06	2.13324e-06	2.70177e-06	2.00184e-06	8.19301e-06	5.11575e-06	3.66509e-06	4.50387e-06	2.7836e-06	1.22432e-06	-0.805934	0.647735	(7Z,10Z)-hexadecadienoylcarnitine	FA
C16H31NO	M+H	C16H31NO+H+	254.248	Palmitoleamide	LMFA08010010	1	0	0	1	0	0	0	0	3.37873e-06	6.81615e-06	1.82365e-05	2.91517e-06	2.51772e-05	2.70481e-06	3.63589e-06	1.89487e-06	1.25522e-05	2.01847e-06	1.15879e-05	3.71355e-06	0.742428	0.252678	Palmitoleamide	FA
C12H23NO4	M+NH4	C12H23NO4+NH4+	263.197	2-Methylbutyroylcarnitine, Isovalerylcarnitine, Valerylcarnitine, Pivaloylcarnitine	HMDB0000378, HMDB0000688, HMDB0013128, HMDB0041993	0	0	1	0	0	0	0	0	1.42323e-06	1.2385e-06	5.77989e-07	7.71163e-07	1.05709e-06	7.442e-07	5.20711e-06	2.47077e-06	2.28928e-06	1.83345e-06	5.97049e-07	4.45083e-07	-1.1438	0.563713	2-Methylbutyroylcarnitine	FA
C18H35NO4	M+H	C18H35NO4+H+	330.264	4,8 Dimethylnonanoyl carnitine, Undecanoylcarnitine	HMDB0006202, HMDB0013321	0	0	1	0	0	0	0	0	1.41598e-05	9.001e-06	1.69967e-05	1.1542e-05	1.31433e-05	1.39731e-05	4.95732e-05	1.52107e-05	2.02705e-05	1.61933e-05	1.72529e-05	2.11698e-05	-0.825468	0.656642	Undecanoylcarnitine	FA
C5H10O4	M+H	C5H10O4+H+	135.065	(R)-2,3-Dihydroxy-isovalerate, 2,3-Dihydroxy-2-methylbutanoic acid, 2,3-dihydroxy-valeric acid	LMFA01050453, LMFA01050468, LMFA01050384	1	0	0	0	0	0	0	0	3.01324e-05	4.72684e-05	3.72729e-05	3.16209e-05	3.86293e-05	3.57859e-05	2.90014e-05	3.97724e-05	2.73845e-05	2.34665e-05	3.33211e-05	3.3265e-05	0.245213	0.647735	2,3-Dihydroxy-2-methylbutanoic acid	FA
Lipid Mass Range
						Replicate Detection								Lesion (TIC-Normalized Average Ion Abundance)						Healthy (TIC-Normalized Average Ion Abundance)
formula	adduct	ion	mz	moleculeNames	moleculeIds	C59M1R1	C59M1R2	C57M3R1	C57M3R2	C57M4R1	C57M4R2	C59M1R3	C59M1R4	C57M3R1	C57M3R2	C57M4R1	C57M4R2	C59M1R1	C59M1R2	C57M3R1	C57M3R2	C57M4R1	C57M4R2	C59M1R1	C59M1R2	log2(Fold Change) (Lesion/Healthy)	"-log10(BH-Adjusted P-Value)"	Selected Annotation	Category
C9H17NO4	M+H	C9H17NO4+H+	204.123	DL-Acetylcarnitine, Acetyl-D-carnitine, Acetyl-L-carnitine	LMFA07070060, LMFA07070049, LMFA07070050	1	1	1	1	1	1	1	1	0.000342654	0.000346346	0.000278141	0.000233881	0.000236418	0.000394146	0.000344247	0.00029259	0.000289458	0.00027876	0.000270791	0.000370549	-0.0116165	0.0209413	Acetyl-L-carnitine	FA
C9H16O4	M+NH4	C9H16O4+NH4+	206.139	Nonate, (+/-)-Ethyl 3-acetoxy-2-methylbutyrate, Azelaic acid, cis- and trans-Ethyl 2,4-dimethyl-1,3-dioxolane-2-acetate, (+/-)-Methyl 5-acetoxyhexanoate, 2,4-Dimethylpimelic acid, 3-Methylsuberic acid, Diethyl methylsuccinate, Diethyl glutarate	HMDB0011717, HMDB0032258, HMDB0000784, HMDB0032200, HMDB0032387, HMDB0059760, HMDB0059783, HMDB0059814, HMDB0059879	1	1	1	1	1	1	1	1	0.000329759	0.000341374	0.000252846	0.000213002	0.000234615	0.000304399	0.000310696	0.000251311	0.000253171	0.000232799	0.000247952	0.000280744	0.0881343	0.224	Azelaic acid	FA
C11H13NO3	M+H	C11H13NO3+H+	208.097	N-Acetyl-L-phenylalanine, 3-Phenylpropionylglycine, Phenylpropionylglycine, N-isopropylterephthalamic acid	HMDB0000512, HMDB0002042, HMDB0000860, HMDB0060608	1	1	1	1	1	1	1	1	0.00111653	0.00104566	0.000999452	0.000658257	0.000816052	0.001504	0.00132048	0.00124525	0.00107475	0.000928112	0.00117653	0.00152263	-0.243282	0.513625	N-Acetyl-L-phenylalanine	PM
C11H13NO2	M+NH4	C11H13NO2+NH4+	209.128	5-Methoxytryptophol	HMDB0001896	1	1	1	1	1	1	1	1	0.000668921	0.000619804	0.000563569	0.000369756	0.000387298	0.000824152	0.000923335	0.000848445	0.000731655	0.000596854	0.000685067	0.000952582	-0.46458	1.1219	5-Methoxytryptophol	PM
C11H15NO2	M+NH4	C11H15NO2+NH4+	211.144	(R)-N-Methylsalsolinol, (S)-N-Methylsalsolinol, (-)-Salsoline, (R)-1,2-dimethyl-5,6-dihydroxy-tetrahydroisoquinoline, 2-Isopropylphenyl methylcarbamate	HMDB0003626, HMDB0003892, HMDB0012469, HMDB0012484, HMDB0031797	1	1	1	1	1	1	1	1	0.00140957	0.0013076	0.0012494	0.000828155	0.000891886	0.00165282	0.00188228	0.00180388	0.00157276	0.00138493	0.00153908	0.00196809	-0.467886	1.39989	(R)-1,2-dimethyl-5,6-dihydroxy-tetrahydroisoquinoline	PM
C10H9N5O	M+H	C10H9N5O+H+	216.088	Kinetin	HMDB0012245	1	1	1	1	1	1	1	1	0.000665658	0.000731934	0.000793973	0.000824213	0.000380007	0.000307048	0.00022877	0.000244712	0.000332388	0.000304176	0.00024269	0.00022238	1.23317	1.48915	Kinetin	PM
C10H17NO4	M+H	C10H17NO4+H+	216.123	2-amino-8-oxo-9,10-epoxy-decanoic acid, Propenoylcarnitine	LMFA01060176, LMFA07070104	1	1	1	1	1	1	1	1	0.000297975	0.000286655	0.000235324	0.000189689	0.000196498	0.000378673	0.000322568	0.000303426	0.000257472	0.000230376	0.000268407	0.000371073	-0.145777	0.26117	Propenoylcarnitine	FA
C13H16N2O	M+H	C13H16N2O+H+	217.134	Nb-Acetyl-Nb-methyltryptamine	HMDB0029837	1	1	1	1	1	1	1	1	0.000443007	0.00040666	0.000423113	0.000263182	0.000294498	0.000542232	0.00060784	0.000583806	0.000543296	0.000475752	0.000506647	0.000651971	-0.505929	1.51226	Nb-Acetyl-Nb-methyltryptamine	PM
C10H19NO4	M+H	C10H19NO4+H+	218.139	O-propanoyl-carnitine, O-propanoyl-D-carnitine, Propionylcarnitine	LMFA07070005, LMFA07070099, LMFA07070105	1	1	1	1	1	1	1	1	0.000415093	0.000392052	0.000339476	0.000284238	0.000305201	0.00036253	0.000376394	0.000305019	0.00031195	0.000335991	0.000349142	0.000383519	0.0253647	0.0698982	O-propanoyl-carnitine	FA
C13H18N2O	M+H	C13H18N2O+H+	219.149	5-Methoxydimethyltryptamine, N-despropyl ropinirole	HMDB0002004, HMDB0060625	1	1	1	1	1	1	1	1	0.000307647	0.000285573	0.00030775	0.000195974	0.000210786	0.000384565	0.00042503	0.000412835	0.000411168	0.000350841	0.000378336	0.000469503	-0.532454	1.6406	5-Methoxydimethyltryptamine	PM
C10H18O4	M+NH4	C10H18O4+NH4+	220.154	Sebacic acid, 9,10-dihydroxy-2-decenoic acid, 2,6-Dimethyl-1,8-octanedioic acid, R-2-Hydroxy-3-methylbutanoic acid 3-Methylbutanoyl	LMFA01170006, LMFA01050428, LMFA01170129, LMFA07011009	1	1	1	1	1	1	1	1	9.35587e-05	0.000100998	6.06202e-05	4.25514e-05	5.68362e-05	9.58272e-05	9.0899e-05	5.28369e-05	6.54754e-05	5.17031e-05	5.95822e-05	7.62977e-05	0.182788	0.257639	Sebacic acid	FA
C11H19NO4	M+H	C11H19NO4+H+	230.139	Butenylcarnitine	LMFA07070053	1	1	1	1	1	1	1	1	0.000297175	0.000309628	0.00019198	0.000170136	0.000197576	0.000304028	0.000311161	0.000244163	0.000218794	0.00018113	0.000204048	0.000273929	0.0370638	0.0557596	Butenylcarnitine	FA
C11H21NO4	M+H	C11H21NO4+H+	232.154	Butyrylcarnitine, O-butanoyl-carnitine, Isobutyryl-L-carnitine	LMFA07070054, LMFA07070003, LMFA07070075	1	1	1	1	1	1	1	1	0.000195951	0.000189058	0.000138389	0.000104948	0.000134363	0.000187525	0.000194545	0.000147041	0.000141608	0.000124996	0.000152815	0.000190488	-0.00191003	0.00372371	Butyrylcarnitine	FA
C10H19NO5	M+H	C10H19NO5+H+	234.134	Hydroxypropionylcarnitine	LMFA07070074	1	1	1	1	1	1	1	1	0.000690427	0.000688201	0.000612604	0.000589945	0.000613035	0.000762746	0.00068524	0.00064605	0.000650067	0.000648096	0.000649575	0.00071705	-0.0141933	0.0636125	Hydroxypropionylcarnitine	FA
C11H20O4	M+NH4	C11H20O4+NH4+	234.17	Undecanedioic acid, Butyl butyryllactate	LMFA01170007, LMFA07010792	1	1	1	1	1	1	1	1	6.343e-05	6.69986e-05	3.02981e-05	2.49966e-05	2.97068e-05	5.55611e-05	6.48227e-05	3.10628e-05	3.04446e-05	2.60619e-05	2.7776e-05	3.93609e-05	0.303835	0.305072	Undecanedioic acid	FA
C16H30O	M+H	C16H30O+H+	239.237	Hexadecenal	HMDB0060482	1	1	1	1	1	1	1	1	0.000813314	0.00080342	0.000871196	0.000973909	0.00071978	0.00072783	0.000723406	0.00077614	0.000770251	0.000833781	0.000745268	0.000734581	0.0991345	0.491517	Hexadecenal	FA
C10H17NO6	M+H	C10H17NO6+H+	248.113	Malonylcarnitine, O-malonylcarnitine	LMFA07070080, LMFA07070093	1	1	1	1	1	1	1	1	0.000418024	0.000171755	0.000256561	0.000170565	0.000386672	0.000186603	0.000520735	0.000249029	0.000316732	0.000208615	0.000475992	0.00024976	-0.345782	0.375542	Malonylcarnitine	FA
C11H21NO5	M+H	C11H21NO5+H+	248.149	3-hydroxybutyrylcarnitine, Hydroxybutyrylcarnitine	LMFA07070037, LMFA07070071	1	1	1	1	1	1	1	1	0.000480568	0.000468872	0.00036001	0.000249509	0.000289635	0.000526536	0.000469532	0.000366038	0.000370722	0.000308472	0.000367939	0.000498998	-0.00398511	0.00471282	Hydroxybutyrylcarnitine	FA
C12H22O4	M+NH4	C12H22O4+NH4+	248.186	Bis(1-methylethyl) hexanedioate, Dodecanedioic acid, Dipropyl hexanedioate	LMFA07010790, LMFA01170009, LMFA07010841	1	1	1	1	1	1	1	1	7.40461e-05	7.83773e-05	7.3861e-05	6.93543e-05	7.15102e-05	6.53363e-05	7.32708e-05	5.36129e-05	7.91609e-05	9.7991e-05	6.91672e-05	7.08662e-05	-0.0381331	0.0878988	Dodecanedioic acid	FA
C16H30O2	M+H	C16H30O2+H+	255.232	8E-Tetradecenyl acetate, 2-hexyl-2-decenoic acid, Gaidic acid, 7Z-palmitoleic acid, 8Z-Hexadecenoic acid, 6E-Hexadecenoic acid, 9E-Tetradecenyl acetate, 12E-Tetradecenyl acetate, 3E-Tetradecenyl acetate, 6E-Tetradecenyl acetate, 8Z-Tetradecenyl acetate, 9Z-Tetradecenyl acetate, dodecyl 2E-butenoate, delta-hexadecalactone, Vittatalactone, 15R-Hexadecanolide, 16-Hexadecanolide, 10-hexadecenoic acid…	LMFA07010291, LMFA01020141, LMFA01030054, LMFA01030055, LMFA01031081, LMFA01031082, LMFA07010293, LMFA07010286, LMFA07010287, LMFA07010289, LMFA07010315, LMFA07010316, LMFA07010515, LMFA07040055, LMFA07040032, LMFA07040052, LMFA07040054, LMFA01030260, LMFA01030261, LMFA01030262, LMFA07010537, LMFA07010307, LMFA07010312, LMFA07010313, LMFA07010314, LMFA07010491, LMFA01030263, LMFA01030264, LMFA010…	1	1	1	1	1	1	1	1	0.000978167	0.00098379	0.000926109	0.00109278	0.000942752	0.000934516	0.000865975	0.000921009	0.000819827	0.000839278	0.000847112	0.000846131	0.188856	1.74973	cis-9-palmitoleic acid	FA
C16H32O2	M+H	C16H32O2+H+	257.248	Ethyl tetradecanoate, Palmitic acid, Trimethyltridecanoic acid, Isopalmitic acid, Butyl dodecanoate, Dodecyl butyrate, Hexyl decanoate, Octyl octanoate, Dodecyl 2-methylpropanoate	HMDB0034153, HMDB0000220, HMDB0002396, HMDB0031068, HMDB0032065, HMDB0032249, HMDB0032324, HMDB0033166, HMDB0036210	1	1	1	1	1	1	1	1	0.00142577	0.00142165	0.0015988	0.00201334	0.00119585	0.00099135	0.000931538	0.000979943	0.00108756	0.00124797	0.000982514	0.000886894	0.499476	1.21021	Palmitic acid	FA
C12H20O6	M+H	C12H20O6+H+	261.133	Glycerol tripropanoate	HMDB0032857	1	1	1	1	1	1	1	1	9.78418e-05	0.000118451	6.98697e-05	9.14647e-05	9.04618e-05	9.33138e-05	4.93052e-05	3.46633e-05	3.13705e-05	6.41274e-05	5.93439e-05	3.6139e-05	1.02987	2.2114	Glycerol tripropanoate	PM
C18H32O	M+H	C18H32O+H+	265.253	9Z,12Z-Octadecadienal, 11E,14E-Octadecadienal, 2E,13Z-Octadecadienal, 3Z,13Z-Octadecadienal, 6S,7R-Epoxy-3Z,9Z-octadecadiene, 3,4-Epoxy-6,9-octadecadiene, 5-(1-hydroxypropan-2-yl)isolongifolane, 9,12,15-Octadecatrien-1-ol, 9,12-octadecadienal, 3E,13Z-Octadecadienal, 11Z,13Z-Octadecadienal, 13Z,15Z-Octadecadienal, 9S,10R-Epoxy-6Z-octadecene	LMFA06000242, LMFA06000233, LMFA06000234, LMFA06000241, LMFA12000287, LMFA12000288, LMPR0103500010, LMFA05000216, LMFA06000101, LMFA06000235, LMFA06000239, LMFA06000240, LMFA12000284	1	1	1	1	1	1	1	1	0.00201072	0.00196016	0.00266011	0.00279876	0.00209699	0.00169004	0.00204611	0.00234442	0.00239038	0.00269374	0.00225859	0.00189451	-0.0441785	0.091264	(z)-9,17-octadecadienal	PM
C18H34O	M+H	C18H34O+H+	267.268	9-Octadecenal	HMDB0030965	1	1	1	1	1	1	1	1	0.000512421	0.000501319	0.000590515	0.000658626	0.000523212	0.000487022	0.000556952	0.000590809	0.000607636	0.000669948	0.000599165	0.00054798	-0.126266	0.636863	9-Octadecenal	FA
C12H14O7	M+H	C12H14O7+H+	271.081	Phenylglucuronide, Phenol glucuronide, 3,4,5-trihydroxy-6-phenoxyoxane-2-carboxylic acid	HMDB0059806, HMDB0060014, HMDB0135168	1	1	1	1	1	1	1	1	0.000257253	0.000302534	0.000247637	0.000315887	0.000225828	0.000257543	0.00013248	0.000166279	0.000170755	0.000278976	0.000193707	0.000188639	0.506694	1.48907	Phenylglucuronide	PM
C18H30O2	M+H	C18H30O2+H+	279.232	13-(2-Cyclopentenyl)-9Z-tridecenoic acid, Gorlic acid, Alvaradoic acid, 7E-Octadecen-9-ynoic acid, estrane-3alpha,17alpha-diol, 10E,12E,14E-Hexadecatrienyl acetate, 10,12,14-octadecatrienoic acid, gamma-Linolenic acid, alpha-calendic acid, Punicic acid, alpha-eleostearic acid, 9,12,14-octadecatrienoic acid, 5,9,12-octadecatrienoic acid, 5Z,9Z,12E-octadecatrienoic acid, 7E,9Z,12Z-octadecatrienoic …	LMFA01140042, LMFA01140020, LMFA01031029, LMFA01031047, LMST02010019, LMFA07010350, LMFA01030154, LMFA01030141, LMFA01030144, LMFA01030146, LMFA01030147, LMFA01030151, LMFA01030342, LMFA01030343, LMFA01030345, LMFA01030353, LMFA01140062, LMFA01030775, LMFA01030773, LMFA01030815, LMFA02000319, LMFA07010360, LMFA07010370, LMFA07010541, LMFA01030339, LMFA01030341, LMFA01030344, LMFA01030346, LMFA010…	0	0	1	1	1	1	0	0	0.000307649	0.000306201	0.000239403	0.000267232	0.000219649	0.000217804	0.000253027	0.00025623	0.000210978	0.000215575	0.000205089	0.000214551	0.200866	0.754133	gamma-Linolenic acid	FA
C18H33NO	M+H	C18H33NO+H+	280.263	Linoleamide	LMFA08010008	1	1	1	1	1	1	1	1	0.000163729	0.000156041	0.000156016	0.00011733	9.92237e-05	0.000140977	0.000149706	0.000151546	0.000151329	0.000136001	0.000140568	0.000156034	-0.0871093	0.261128	Linoleamide	FA
C18H32O2	M+H	C18H32O2+H+	281.248	Linoleic acid, Bovinic acid, 9E,11E-Octadecadienoic acid, 10E,12Z-Octadecadienoic acid, Linoelaidic acid, Mangiferic acid, Linalyl caprylate, Ethyl 2E,4Z-hexadecadienoate, 5-Octadecynoic acid, Dihomolinoleic acid, 6Z,9Z-octadecadienoic acid, Octadecadienoate	HMDB0000673, HMDB0003797, HMDB0005047, HMDB0005048, HMDB0006270, HMDB0029800, HMDB0030430, HMDB0031051, HMDB0031097, HMDB0061864, HMDB0062238, HMDB0062784	1	1	1	1	1	1	1	1	0.000613365	0.000595571	0.000520424	0.000655914	0.000437083	0.000387507	0.000387069	0.000418025	0.000343401	0.000354881	0.000346087	0.000352002	0.544048	1.48915	Linoleic acid	FA
C18H35NO	M+H	C18H35NO+H+	282.279	Oleamide	HMDB0002117	1	1	1	1	1	1	1	1	0.000503181	0.000475649	0.000600326	0.000528289	0.000402139	0.000434189	0.000422661	0.000476863	0.000585285	0.000623726	0.000546023	0.00057359	-0.133041	0.426308	Oleamide	FA
C18H34O2	M+H	C18H34O2+H+	283.263	Oleic acid, Elaidic acid, Vaccenic acid, (Z)-13-Octadecenoic acid, Ethyl 9-hexadecenoate, (E)-13-Octadecenoic acid, 7Z-octadecenoic acid, Octadec-9-enoic Acid	HMDB0000207, HMDB0000573, HMDB0003231, HMDB0041480, HMDB0059871, HMDB0062218, HMDB0062242, HMDB0062703	1	1	1	1	1	1	1	1	0.00219936	0.00218472	0.00274038	0.0032236	0.00221184	0.00166255	0.00183473	0.00202261	0.00216925	0.00254763	0.00197333	0.00167775	0.218301	0.514211	Oleic acid	FA
C20H28O	M+H	C20H28O+H+	285.221	9-cis retro-gamma-retinal, 11-cis-retinal, 9-cis-retinal, 13-cis-retinal, 11-cis retro-gamma-retinal, Sinulobatin B, Retinal, All-Trans-3,4-Didehydro Retinol, 11-cis-3,4-didehydroretinol, Lynestrenol, dehydroabietadienal	LMPR01090036, LMPR01090003, LMPR01090017, LMPR01090018, LMPR01090035, LMPR0104410002, LMPR01090002, LMPR01090008, LMPR01090010, LMST02030127, LMPR0104050011	1	1	1	1	1	1	1	1	0.000249606	0.000255967	0.000239427	0.000227111	0.00021076	0.000247327	0.000244787	0.000246026	0.000221848	0.000209384	0.000231638	0.000236616	0.0408203	0.256044	Retinal	PR
[truncated: 174 more rows]
